# Supplementary material for: A microbiota-epigenetic circuit controls systematic circadian programs in the gut epithelium
Source: Front Syst Biol. 2023 Aug 8;3:1175306. doi: 10.3389/fsysb.2023.1175306 (PMC12312700; doi:10.3389/fsysb.2023.1175306)
Supplement: Supplementary file 1 [file Table2.XLSX]

## Sheet: Sheet1
Names	CV8	CV20	Amp_CV	GF8	GF20	Amp_GF	KO8	KO20	Amp_KO
0610005C13Rik	68.4062	47.7159	0.302462	152.81	130.338	0.147057	191.727	65.5043	0.658346
0610007C21Rik	226.984	61.0764	0.730923	393.036	358.912	0.0868211	311.719	173.119	0.444633
0610007L01Rik	20.9883	20.995	0.000320397	352.998	394.225	0.104578	23.4768	16.3761	0.302456
0610007L01Rik	275.957	85.8886	0.688761	13.3459	15.4095	0.133917	466.927	339.219	0.273507
0610007N19Rik	183.453	55.3505	0.698285	292.275	292.138	0.000468154	119.992	149.724	0.198577
0610007P08Rik	286.062	68.7109	0.759804	399.041	387.805	0.0281593	331.283	374.31	0.114951
0610007P08Rik	286.84	66.8023	0.767109	398.374	386.521	0.0297548	336.5	374.31	0.101013
0610007P14Rik	177.234	57.2591	0.67693	254.906	288.927	0.11775	211.291	184.816	0.125301
0610007P22Rik	97.9453	47.7159	0.512831	154.812	165.01	0.0617998	190.423	159.082	0.164585
0610008F07Rik	83.1758	34.3555	0.586953	152.143	195.187	0.220525	169.554	145.045	0.14455
0610009B14Rik	23.3203	28.6295	0.185446	35.3666	57.1434	0.381091	58.6919	39.7705	0.322385
0610009B22Rik	247.195	55.3505	0.776086	313.628	444.948	0.295136	311.719	219.907	0.294534
0610009D07Rik	126.707	43.8986	0.653542	160.15	202.249	0.208153	116.08	149.724	0.224711
0610009L18Rik	1275.62	209.95	0.835413	1754.31	1523.61	0.131507	2103.78	1457.47	0.307213
0610009O20Rik	230.094	66.8023	0.709674	274.258	295.99	0.0734229	203.465	238.623	0.147336
0610010B08Rik	27.9844	20.995	0.24976	32.6974	46.8704	0.302388	15.6512	39.7705	0.606463
0610010B08Rik	15.5469	11.4518	0.2634	37.3684	45.5863	0.180271	24.781	37.431	0.337955
0610010B08Rik	22.543	11.4518	0.492	38.0357	43.0181	0.11582	23.4768	30.4127	0.228061
0610010B08Rik	23.3203	11.4518	0.508934	36.0338	35.3133	0.019995	22.1725	25.7338	0.138392
0610010B08Rik	27.9844	13.3605	0.522574	36.0338	33.3872	0.0734498	22.1725	25.7338	0.138392
0610010B08Rik	20.9883	9.54318	0.545309	36.0338	32.7451	0.0912681	26.0853	18.7155	0.282526
0610010F05Rik	90.1718	45.8073	0.492	150.141	170.146	0.117576	195.64	147.385	0.246652
0610010K14Rik	244.863	85.8886	0.649238	321.635	438.528	0.266556	384.758	262.017	0.319008
0610010O12Rik	379.344	110.701	0.708178	547.181	433.391	0.207956	1038.19	624.63	0.398349
0610011F06Rik	88.6172	45.8073	0.483088	92.7538	179.777	0.484062	159.12	98.2565	0.382502
0610011L14Rik	150.805	53.4418	0.645622	243.562	305.621	0.203058	161.729	152.064	0.0597616
0610012G03Rik	210.66	57.2591	0.728192	339.652	335.156	0.0132388	202.161	203.531	0.00673271
0610012H03Rik	24.0976	24.8123	0.0288013	49.3797	50.7228	0.0264791	70.4303	77.2015	0.0877088
0610030E20Rik	180.344	43.8986	0.756583	258.243	287.001	0.100204	452.58	266.696	0.41072
0610031J06Rik	107.273	28.6295	0.733116	187.509	194.544	0.0361613	122.601	105.275	0.141321
0610031O16Rik	33.4258	20.995	0.371892	40.7049	52.0069	0.217318	106.95	39.7705	0.628138
0610037L13Rik	92.5039	38.1727	0.587339	124.117	123.918	0.00160197	97.8198	74.8621	0.234694
0610037P05Rik	132.148	49.6245	0.624479	176.165	184.914	0.0473089	76.9516	102.935	0.252428
0610038B21Rik	19.4336	19.0864	0.0178671	22.0207	26.3245	0.163491	32.6066	18.7155	0.426021
0610038L08Rik	21.7656	17.1777	0.210786	18.6842	15.4095	0.175269	44.345	23.3944	0.472445
0610039K10Rik	481.953	112.61	0.766347	649.944	577.855	0.110916	914.289	687.795	0.247727
0610040B10Rik	192.004	40.0814	0.791247	320.968	342.218	0.0620957	198.248	254.999	0.222553
0610040F04Rik	20.2109	26.7209	0.243629	325.639	382.668	0.14903	7.82558	21.055	0.628326
0610040F04Rik	292.281	93.5232	0.680023	14.6805	10.915	0.256492	423.886	322.843	0.238374
0610040J01Rik	179.566	47.7159	0.734271	258.243	265.813	0.0284811	298.676	280.733	0.0600774
0610043K17Rik	15.5469	9.54318	0.386167	20.0188	21.8301	0.0829712	15.6512	28.0733	0.442489
0910001L09Rik	68.4062	51.5332	0.246659	109.436	127.77	0.143492	91.2985	86.5593	0.0519091
1100001G20Rik	15.5469	15.2691	0.0178671	16.6823	14.1253	0.153276	31.3023	30.4127	0.0284203
1110001A16Rik	111.937	45.8073	0.590778	126.786	136.117	0.0685525	108.254	53.8071	0.502955
1110001J03Rik	384.785	122.153	0.682543	464.436	572.718	0.189067	386.062	311.145	0.194053
1110002B05Rik	144.586	40.0814	0.722785	158.816	168.862	0.0594934	149.99	142.706	0.0485668
1110002L01Rik	380.898	82.0714	0.784532	517.82	504.018	0.0266539	423.886	346.237	0.183183
1110002N22Rik	117.379	51.5332	0.560967	160.818	192.618	0.165096	215.204	210.55	0.0216261
1110003E01Rik	311.715	85.8886	0.724464	420.395	421.834	0.00341159	523.01	437.475	0.163543
1110004E09Rik	116.602	45.8073	0.607147	166.823	167.578	0.00450255	189.118	131.009	0.307266
1110004F10Rik	148.473	34.3555	0.768607	231.551	230.5	0.00453883	170.859	131.009	0.233234
1110005A03Rik	352.914	133.605	0.621425	486.457	502.734	0.0323765	633.872	505.319	0.202806
1110006O24Rik	205.996	76.3455	0.629384	327.641	367.901	0.109431	496.925	486.603	0.0207701
1110007C09Rik	181.898	68.7109	0.622257	248.233	292.138	0.150287	255.636	173.119	0.322792
1110008F13Rik	328.039	78.2541	0.761449	480.451	505.944	0.0503864	526.923	350.916	0.334028
1110008J03Rik	250.305	80.1627	0.679739	413.722	468.704	0.117307	213.899	247.981	0.137435
1110008L16Rik	258.855	47.7159	0.815666	398.374	450.727	0.116151	211.291	226.926	0.0688986
1110008P14Rik	64.5195	34.3555	0.467518	58.7218	84.11	0.301845	54.7791	84.2198	0.34957
1110012J17Rik	19.4336	28.6295	0.321205	24.6899	39.1657	0.369605	22.1725	30.4127	0.270947
1110012L19Rik	40.4219	9.54318	0.76391	80.0752	82.1838	0.0256569	32.6066	79.541	0.590065
1110014N23Rik	109.605	45.8073	0.582071	152.81	229.858	0.335197	138.252	170.779	0.190463
1110015O18Rik	9.32812	17.1777	0.456964	8.67481	5.13649	0.407885	1.30426	28.0733	0.953541
1110017D15Rik	24.0976	20.995	0.128753	12.0113	17.9777	0.331879	14.3469	25.7338	0.442489
1110017D15Rik	32.6484	24.8123	0.240016	30.0282	32.7451	0.0829712	43.0407	23.3944	0.456459
1110017D15Rik	32.6484	24.8123	0.240016	30.0282	32.7451	0.0829712	43.0407	23.3944	0.456459
1110017F19Rik	162.465	55.3505	0.659308	218.205	245.267	0.110338	130.426	114.633	0.121094
1110018G07Rik	171.793	41.99	0.755578	299.615	356.344	0.159197	221.725	191.834	0.13481
1110018J18Rik	113.492	53.4418	0.529114	151.476	188.766	0.197548	179.988	138.027	0.233134
1110019D14Rik	111.16	34.3555	0.690937	198.853	250.404	0.205869	67.8217	107.614	0.36977
1110020A21Rik	638.199	152.691	0.760747	774.06	778.82	0.0061111	897.334	729.905	0.186584
1110020A21Rik	614.879	135.513	0.77961	767.387	753.137	0.0185696	944.287	690.135	0.269147
1110020G09Rik	117.379	59.1677	0.495925	118.111	154.095	0.233517	262.157	145.045	0.446724
1110021J02Rik	41.1992	22.9036	0.444076	40.7049	53.9331	0.245271	29.9981	119.311	0.748573
1110021J02Rik	41.1992	22.9036	0.444076	40.7049	53.9331	0.245271	29.9981	119.311	0.748573
1110021L09Rik	128.262	49.6245	0.613099	188.177	226.005	0.16738	200.857	152.064	0.242925
1110028C15Rik	176.457	36.2641	0.794488	123.449	168.22	0.266144	388.671	266.696	0.313825
1110028F11Rik	29.5391	20.995	0.289246	40.7049	44.3022	0.0811991	33.9109	28.0733	0.172145
1110028F18Rik	35.7578	13.3605	0.626363	45.376	60.9958	0.25608	80.8644	63.1649	0.218879
1110031I02Rik	76.1797	36.2641	0.523966	110.771	114.929	0.0361805	57.3876	102.935	0.442489
1110032A03Rik	240.976	59.1677	0.754467	373.684	428.255	0.127425	251.723	116.972	0.535315
1110032A04Rik	40.4219	34.3555	0.150077	63.3929	98.2353	0.354683	71.7345	93.5776	0.233422
1110032F04Rik	11.6602	15.2691	0.236356	20.0188	21.8301	0.0829712	19.564	28.0733	0.303111
1110034A24Rik	47.418	26.7209	0.436481	58.0545	87.9623	0.340007	31.3023	131.009	0.761067
1110034B05Rik	324.93	87.7973	0.729796	391.034	405.14	0.0348187	472.144	301.788	0.360814
1110034B05Rik	324.93	87.7973	0.729796	391.034	405.14	0.0348187	472.144	301.788	0.360814
1110034G24Rik	13.9922	19.0864	0.266902	18.0169	26.3245	0.315583	18.2597	9.35776	0.487518
1110035M17Rik	218.434	62.985	0.711651	265.583	324.883	0.182527	742.126	531.053	0.284417
1110036E04Rik	79.289	34.3555	0.566706	107.434	91.8147	0.145387	147.382	70.1832	0.5238
1110037F02Rik	116.602	36.2641	0.688991	195.517	209.312	0.0659058	255.636	91.2381	0.643093
1110038B12Rik	310.937	76.3455	0.754467	400.376	473.199	0.153895	356.064	287.751	0.191856
1110038B12Rik	313.269	76.3455	0.756295	401.043	473.199	0.152485	356.064	273.714	0.231278
1110038D17Rik	394.113	99.2491	0.748171	578.543	538.689	0.0688874	1014.72	439.815	0.566564
1110038F14Rik	105.719	34.3555	0.67503	157.481	225.363	0.301212	147.382	138.027	0.0634739
1110046J04Rik	331.148	68.7109	0.792507	582.547	484.114	0.16897	577.789	362.613	0.372413
1110049F12Rik	159.355	57.2591	0.640683	214.201	315.252	0.32054	246.506	292.43	0.157043
1110050K14Rik	20.9883	9.54318	0.545309	16.6823	21.188	0.212652	18.2597	44.4494	0.589202
1110051M20Rik	20.2109	11.4518	0.433385	28.0263	37.8816	0.26016	6.52132	14.0366	0.535407
1110054M08Rik	529.371	116.427	0.780066	623.252	691.5	0.0986949	1009.5	734.584	0.272329
1110054O05Rik	119.711	45.8073	0.617351	186.175	221.511	0.159523	164.337	123.99	0.245513
1110057K04Rik	152.359	57.2591	0.624184	232.885	281.865	0.173769	193.031	112.293	0.418264
1110057K04Rik	153.914	57.2591	0.62798	232.885	281.223	0.171882	193.031	112.293	0.418264
1110057K04Rik	154.691	57.2591	0.629849	232.885	277.37	0.160381	193.031	112.293	0.418264
1110058L19Rik	89.3945	51.5332	0.423531	141.466	195.187	0.275225	209.987	170.779	0.186714
1110059E24Rik	333.48	72.5282	0.782511	378.355	398.078	0.049544	778.646	470.227	0.396096
1110059G10Rik	282.176	72.5282	0.742968	399.709	403.214	0.00869379	316.936	229.265	0.276621
1110059M19Rik	2.33203	0	1	5.33835	0.642061	0.879727	0	9.35776	1
1110065P20Rik	325.707	78.2541	0.759741	407.716	433.391	0.0592416	626.047	549.768	0.121841
1110067D22Rik	319.488	82.0714	0.743116	445.752	368.543	0.173211	626.047	531.053	0.151736
1190002F15Rik	192.781	57.2591	0.702984	227.547	252.972	0.100505	181.293	187.155	0.0313241
1190002H23Rik	30.3164	20.995	0.30747	40.7049	32.103	0.211322	56.0834	53.8071	0.0405868
1190002N15Rik	203.664	61.0764	0.700112	233.553	309.473	0.245322	361.281	250.32	0.307132
1190003J15Rik	69.9609	47.7159	0.317963	70.7331	95.025	0.255637	86.0814	42.1099	0.510813
1190003K10Rik	10.8828	22.9036	0.524844	16.6823	7.06267	0.576638	23.4768	30.4127	0.228061
1190005F20Rik	367.683	103.066	0.719687	512.481	593.906	0.137101	743.431	556.787	0.251058
1190005I06Rik	41.9765	19.0864	0.545309	44.7087	50.7228	0.118569	65.2132	93.5776	0.303111
1190007F08Rik	27.9844	43.8986	0.362523	34.6993	43.6601	0.205242	35.2151	18.7155	0.468538
1190007I07Rik	161.687	47.7159	0.704888	222.876	247.835	0.10071	140.861	121.651	0.136374
1200009I06Rik	81.6211	36.2641	0.555702	120.113	137.401	0.125823	194.335	95.917	0.506436
1200011I18Rik	237.09	66.8023	0.718241	320.301	356.344	0.101147	263.461	238.623	0.0942776
1200011M11Rik	175.68	61.0764	0.652342	254.239	292.78	0.131638	191.727	299.448	0.359733
1200014J11Rik	183.453	59.1677	0.677478	234.887	288.927	0.187037	316.936	156.742	0.505445
1200016B10Rik	390.226	99.2491	0.745663	543.177	677.374	0.198114	779.95	566.144	0.274127
1300001I01Rik	202.109	112.61	0.442828	260.912	234.994	0.0993342	260.853	212.889	0.183873
1300002E11Rik	228.539	93.5232	0.590778	297.613	367.259	0.189637	269.983	217.568	0.194141
1300002E11Rik	228.539	93.5232	0.590778	297.613	367.259	0.189637	269.983	217.568	0.194141
1300002K09Rik	52.082	19.0864	0.633533	49.3797	66.1323	0.253319	44.345	42.1099	0.0504018
1300010F03Rik	165.574	72.5282	0.56196	198.186	204.817	0.0323765	384.758	276.054	0.282526
1300010F03Rik	165.574	72.5282	0.56196	198.186	204.817	0.0323765	384.758	276.054	0.282526
1300014I06Rik	81.6211	57.2591	0.298477	144.135	196.471	0.266377	298.676	194.173	0.349887
1300015D01Rik	16.3242	26.7209	0.389085	25.3572	19.9039	0.215058	23.4768	28.0733	0.163733
1300017J02Rik	19.4336	19.0864	0.0178671	16.6823	16.6936	0.000673714	15.6512	9.35776	0.402105
1300018I17Rik	228.539	74.4368	0.674293	342.989	449.443	0.236857	551.704	367.292	0.334259
1300018J18Rik	168.684	55.3505	0.671868	198.853	221.511	0.102286	289.547	257.338	0.111237
1500001M20Rik	73.0703	38.1727	0.477589	104.765	128.412	0.18415	83.4729	95.917	0.129738
1500002O10Rik	10.1055	15.2691	0.338175	7.34023	5.77855	0.212756	2.60853	2.33944	0.103157
1500002O20Rik	127.484	68.7109	0.461025	166.823	147.674	0.114788	146.078	147.385	0.00886877
1500003O03Rik	144.586	43.8986	0.696384	232.218	274.802	0.154962	220.421	304.127	0.275235
1500004A13Rik	26.4297	19.0864	0.277843	22.0207	35.9554	0.387556	29.9981	25.7338	0.14215
1500009C09Rik	20.9883	22.9036	0.083627	16.015	12.1992	0.238269	22.1725	25.7338	0.138392
1500009C09Rik	16.3242	28.6295	0.429812	19.3515	11.5571	0.402781	43.0407	18.7155	0.565167
1500009L16Rik	40.4219	22.9036	0.433385	44.0414	63.564	0.307134	63.9089	121.651	0.474653
1500010J02Rik	146.141	49.6245	0.660433	164.154	197.113	0.167206	138.252	70.1832	0.492353
1500011B03Rik	36.5351	34.3555	0.05966	48.0451	66.1323	0.273499	39.1279	74.8621	0.477333
1500011B03Rik	36.5351	34.3555	0.05966	48.0451	66.1323	0.273499	39.1279	74.8621	0.477333
1500011H22Rik	91.7265	40.0814	0.563034	152.143	197.113	0.228143	186.51	170.779	0.0843423
1500011K16Rik	65.2969	41.99	0.356937	109.436	132.907	0.176594	83.4729	51.4677	0.383421
1500012F01Rik	310.937	106.884	0.656254	421.062	545.11	0.227564	541.27	509.998	0.0577748
1500012K07Rik	21.7656	19.0864	0.123096	16.6823	10.915	0.345713	15.6512	11.6972	0.252631
1500012K07Rik	21.7656	17.1777	0.210786	17.3496	10.915	0.370878	15.6512	11.6972	0.252631
1500015A07Rik	201.332	55.3505	0.725079	234.22	386.521	0.39403	348.239	226.926	0.348361
1500015L24Rik	17.1016	15.2691	0.107152	14.6805	7.70473	0.475171	9.12985	14.0366	0.34957
1500015O10Rik	17.8789	22.9036	0.219386	17.3496	12.1992	0.296864	39.1279	14.0366	0.641263
1500016L03Rik	19.4336	11.4518	0.41072	23.3553	39.1657	0.403681	43.0407	58.486	0.264085
1500017E21Rik	17.1016	11.4518	0.330364	10.0094	7.70473	0.230251	11.7384	70.1832	0.832747
1500031L02Rik	151.582	47.7159	0.685214	183.506	255.54	0.281891	221.725	245.641	0.0973626
1500032L24Rik	125.93	45.8073	0.636247	171.494	188.766	0.0914968	307.806	121.651	0.604781
1520402A15Rik	39.6445	20.995	0.470419	51.3816	87.3203	0.411573	41.7365	44.4494	0.0610336
1600002D24Rik	13.9922	19.0864	0.266902	26.0244	29.5348	0.118855	23.4768	32.7522	0.2832
1600002D24Rik	18.6562	32.4468	0.425021	15.3477	9.63091	0.372487	58.6919	23.3944	0.601403
1600002H07Rik	64.5195	30.5382	0.526683	82.0771	118.139	0.305251	136.948	93.5776	0.316691
1600002K03Rik	131.371	32.4468	0.753014	145.47	181.061	0.19657	96.5155	107.614	0.103134
1600010M07Rik	19.4336	24.8123	0.216775	21.3534	12.1992	0.428702	5.21706	23.3944	0.776995
1600012F09Rik	118.934	32.4468	0.727185	172.829	202.249	0.145465	155.207	135.688	0.125767
1600012H06Rik	162.465	55.3505	0.659308	221.541	242.057	0.084755	303.894	149.724	0.507314
1600014C10Rik	115.047	49.6245	0.568658	146.137	208.028	0.297511	161.729	133.348	0.175483
1600014C10Rik	94.8359	40.0814	0.577361	191.513	242.057	0.208809	253.027	156.742	0.380531
1600014C23Rik	30.3164	34.3555	0.117567	41.3722	55.8593	0.25935	29.9981	37.431	0.198577
1600014K23Rik	12.4375	11.4518	0.0792504	4.67105	7.70473	0.393742	7.82558	35.0916	0.776995
1600015I10Rik	11.6602	20.995	0.444622	10.6767	14.1253	0.244146	20.8682	2.33944	0.887895
1600016N20Rik	62.1875	43.8986	0.294092	67.3966	113.645	0.406953	127.818	105.275	0.176369
1600019K03Rik	24.0976	15.2691	0.366366	14.0132	6.42061	0.541816	0	39.7705	1
1600020E01Rik	738.476	162.234	0.780312	900.179	902.738	0.00283442	945.591	764.997	0.190986
1600020E01Rik	767.238	164.143	0.78606	928.872	929.704	0.00089456	969.068	783.712	0.191272
1600021P15Rik	111.16	36.2641	0.673767	165.489	194.544	0.149352	247.81	210.55	0.150359
1600025M17Rik	6.21875	5.72591	0.0792504	13.3459	5.13649	0.615125	14.3469	2.33944	0.836938
1600027N09Rik	20.9883	15.2691	0.272494	37.3684	60.9958	0.38736	52.1706	44.4494	0.147999
1600029D21Rik	22.543	22.9036	0.0157476	12.0113	17.9777	0.331879	24.781	30.4127	0.185176
1600029I14Rik	37.3125	43.8986	0.150031	62.7256	100.161	0.373756	24.781	30.4127	0.185176
1600029O15Rik	17.1016	17.1777	0.00443431	14.0132	17.9777	0.220525	5.21706	32.7522	0.840711
1700001C02Rik	19.4336	13.3605	0.312507	16.015	10.915	0.318451	22.1725	16.3761	0.261424
1700001C19Rik	14.7695	20.995	0.296522	289.605	325.525	0.110343	9.12985	14.0366	0.34957
1700001C19Rik	216.879	64.8936	0.700784	18.6842	14.7674	0.209632	440.841	311.145	0.294201
1700001D01Rik	19.4336	22.9036	0.151507	16.015	14.7674	0.0779044	14.3469	21.055	0.318597
1700001F09Rik	37.3125	24.8123	0.335014	21.3534	8.98885	0.579043	24.781	11.6972	0.527977
1700001G11Rik	35.7578	26.7209	0.252725	32.0301	41.734	0.232517	28.6938	35.0916	0.182317
1700001G17Rik	76.1797	20.995	0.724401	93.4211	127.128	0.265142	80.8644	81.8804	0.0124085
1700001J03Rik	17.8789	15.2691	0.145971	13.3459	8.98885	0.326469	19.564	7.01832	0.641263
1700001J11Rik	11.6602	13.3605	0.127264	10.6767	2.56824	0.759453	13.0426	14.0366	0.0708145
1700001K19Rik	10.8828	26.7209	0.592723	10.0094	18.6198	0.462431	18.2597	16.3761	0.103157
1700001K23Rik	13.9922	28.6295	0.511268	16.015	17.3356	0.0761784	32.6066	9.35776	0.71301
1700001L05Rik	62.1875	38.1727	0.386167	89.4173	65.4902	0.267589	91.2985	28.0733	0.692511
1700001L19Rik	24.0976	19.0864	0.207957	21.3534	19.9039	0.0678816	52.1706	25.7338	0.506736
1700001O22Rik	27.9844	19.0864	0.317963	35.3666	48.7966	0.275225	16.9554	46.7888	0.637618
1700001O22Rik	21.7656	11.4518	0.473857	14.0132	18.6198	0.247404	61.3004	30.4127	0.503874
1700001P01Rik	15.5469	24.8123	0.37342	24.0226	35.9554	0.331879	35.2151	18.7155	0.468538
1700003C15Rik	13.2148	11.4518	0.133412	8.67481	9.63091	0.0992739	11.7384	16.3761	0.2832
1700003D09Rik	146.141	59.1677	0.595131	220.874	302.411	0.269622	329.979	266.696	0.191778
1700003E16Rik	26.4297	32.4468	0.185446	34.032	33.3872	0.0189469	65.2132	56.1466	0.139031
1700003F12Rik	30.3164	20.995	0.30747	24.0226	18.6198	0.224905	26.0853	7.01832	0.730947
1700003F17Rik	14.7695	15.2691	0.0327174	15.3477	8.34679	0.456155	19.564	23.3944	0.163733
1700003G13Rik	24.0976	19.0864	0.207957	18.6842	10.915	0.415815	10.4341	58.486	0.821596
1700003G18Rik	153.137	30.5382	0.800582	250.902	270.308	0.0717897	176.076	140.366	0.202806
1700003H04Rik	13.2148	11.4518	0.133412	16.015	11.5571	0.27836	10.4341	14.0366	0.256652
1700003L19Rik	11.6602	11.4518	0.0178671	12.0113	11.5571	0.0378133	22.1725	2.33944	0.894489
1700003M02Rik	25.6523	28.6295	0.103991	25.3572	20.5459	0.189738	15.6512	16.3761	0.0442663
1700003M07Rik	24.0976	34.3555	0.298579	22.0207	25.6824	0.142578	27.3895	51.4677	0.46783
1700003M07Rik	21.7656	34.3555	0.366458	22.688	25.6824	0.116596	39.1279	49.1282	0.203555
1700003P14Rik	11.6602	11.4518	0.0178671	9.34211	5.13649	0.450179	5.21706	16.3761	0.681422
1700006A11Rik	14.7695	11.4518	0.224632	11.344	5.77855	0.490607	0	18.7155	1
1700006E09Rik	13.9922	15.2691	0.083627	14.0132	28.2507	0.503971	31.3023	53.8071	0.418249
1700006F04Rik	16.3242	13.3605	0.181556	9.34211	3.85237	0.587634	3.91279	16.3761	0.761067
1700006H21Rik	21.7656	13.3605	0.386167	14.0132	8.98885	0.358542	14.3469	2.33944	0.836938
1700007B14Rik	14.7695	15.2691	0.0327174	12.0113	5.13649	0.572361	0	11.6972	1
1700007F19Rik	14.7695	20.995	0.296522	21.3534	12.8412	0.398633	0	14.0366	1
1700007G11Rik	22.543	19.0864	0.153334	29.3609	39.1657	0.250341	31.3023	60.8254	0.485374
1700007I08Rik	17.1016	15.2691	0.107152	18.0169	19.2618	0.0646306	35.2151	30.4127	0.136374
1700007J10Rik	23.3203	28.6295	0.185446	20.0188	19.2618	0.0378133	13.0426	23.3944	0.442489
1700007K09Rik	20.2109	17.1777	0.150077	13.3459	12.1992	0.0859226	26.0853	16.3761	0.37221
1700007K13Rik	23.3203	22.9036	0.0178671	30.6955	39.8078	0.228907	36.5194	21.055	0.423458
1700007L15Rik	366.129	108.792	0.702858	399.709	453.295	0.118215	717.345	633.988	0.116202
1700007P06Rik	20.9883	17.1777	0.181556	14.0132	7.06267	0.495997	0	49.1282	1
1700008A04Rik	13.9922	26.7209	0.476358	9.34211	5.77855	0.381451	9.12985	2.33944	0.743759
1700008F21Rik	11.6602	13.3605	0.127264	12.0113	7.70473	0.358542	3.91279	4.67888	0.163733
1700008I05Rik	7.77344	5.72591	0.2634	7.34023	1.92618	0.737585	3.91279	2.33944	0.402105
1700008J07Rik	203.664	41.99	0.793827	250.902	306.263	0.180762	545.182	219.907	0.596635
1700008K24Rik	15.5469	17.1777	0.0949403	14.6805	5.77855	0.606378	10.4341	16.3761	0.362844
1700008O03Rik	22.543	22.9036	0.0157476	26.6917	31.461	0.151592	29.9981	37.431	0.198577
1700008P02Rik	7.77344	22.9036	0.660603	10.0094	7.70473	0.230251	7.82558	7.01832	0.103157
1700008P20Rik	18.6562	11.4518	0.386167	14.0132	9.63091	0.312724	7.82558	42.1099	0.814163
1700009C05Rik	18.6562	15.2691	0.181556	8.67481	6.42061	0.259856	24.781	11.6972	0.527977
1700009J07Rik	15.5469	20.995	0.259497	14.6805	12.1992	0.169021	19.564	14.0366	0.282526
1700009N14Rik	13.9922	13.3605	0.0451486	10.6767	5.13649	0.518907	0	9.35776	1
1700009P17Rik	20.2109	15.2691	0.244513	22.688	23.1142	0.0184395	19.564	30.4127	0.356718
1700010B08Rik	18.6562	34.3555	0.456964	12.0113	10.273	0.144723	22.1725	14.0366	0.366935
1700010D01Rik	9.32812	17.1777	0.456964	5.33835	6.42061	0.168561	6.52132	4.67888	0.282526
1700010I02Rik	11.6602	11.4518	0.0178671	12.6786	1.92618	0.848076	6.52132	4.67888	0.282526
1700010I14Rik	21.7656	5.72591	0.736929	25.3572	39.8078	0.36301	27.3895	44.4494	0.383803
1700010J16Rik	13.9922	11.4518	0.181556	8.00752	9.63091	0.168561	9.12985	44.4494	0.794601
1700010K23Rik	19.4336	11.4518	0.41072	11.344	10.915	0.0378133	14.3469	7.01832	0.510813
1700010M22Rik	10.1055	19.0864	0.47054	13.3459	4.49443	0.663235	6.52132	21.055	0.690271
1700011A15Rik	19.4336	17.1777	0.11608	23.3553	22.4721	0.0378133	2.60853	21.055	0.876109
1700011B04Rik	17.8789	9.54318	0.466232	17.3496	7.70473	0.555914	11.7384	25.7338	0.543854
1700011E24Rik	8.55078	19.0864	0.551995	14.6805	8.98885	0.387699	26.0853	11.6972	0.551579
1700011F03Rik	20.2109	9.54318	0.527821	17.3496	17.9777	0.0349363	15.6512	16.3761	0.0442663
1700011F14Rik	20.2109	20.995	0.0373456	22.0207	5.77855	0.737585	9.12985	7.01832	0.231278
1700011H14Rik	17.1016	15.2691	0.107152	24.0226	19.9039	0.17145	24.781	11.6972	0.527977
1700011I03Rik	13.9922	17.1777	0.185446	11.344	16.6936	0.320458	40.4322	28.0733	0.30567
1700011J10Rik	296.945	64.8936	0.781463	384.361	469.346	0.181072	942.983	486.603	0.483974
1700011L22Rik	15.5469	26.7209	0.418176	17.3496	19.2618	0.0992739	9.12985	46.7888	0.804871
1700011M02Rik	4.66406	9.54318	0.511268	7.34023	1.28412	0.825057	5.21706	9.35776	0.442489
1700012A03Rik	15.5469	15.2691	0.0178671	5.33835	4.49443	0.158087	28.6938	7.01832	0.755407
1700012A16Rik	34.2031	26.7209	0.218758	26.0244	43.6601	0.403931	23.4768	30.4127	0.228061
1700012B07Rik	15.5469	26.7209	0.418176	8.00752	9.63091	0.168561	22.1725	14.0366	0.366935
1700012B07Rik	15.5469	26.7209	0.418176	8.00752	9.63091	0.168561	22.1725	14.0366	0.366935
1700012B09Rik	13.9922	17.1777	0.185446	14.0132	18.6198	0.247404	28.6938	32.7522	0.123911
1700012B15Rik	181.121	51.5332	0.715477	222.209	197.113	0.112939	170.859	170.779	0.000465302
1700012D01Rik	64.5195	26.7209	0.585848	168.158	217.659	0.227424	190.423	231.605	0.177812
1700012D14Rik	186.562	47.7159	0.744236	244.229	300.484	0.187215	289.547	250.32	0.135476
1700012I11Rik	19.4336	11.4518	0.41072	16.015	14.1253	0.117996	16.9554	39.7705	0.573668
1700012L04Rik	6.99609	5.72591	0.181556	5.33835	5.13649	0.0378133	5.21706	21.055	0.752217
1700012P22Rik	13.9922	9.54318	0.317963	10.6767	7.70473	0.27836	14.3469	25.7338	0.442489
1700013D24Rik	11.6602	11.4518	0.0178671	16.6823	9.63091	0.422688	14.3469	44.4494	0.67723
1700013F07Rik	35.7578	19.0864	0.466232	33.3647	37.8816	0.119238	13.0426	70.1832	0.814163
1700013G23Rik	155.469	38.1727	0.754467	211.532	237.563	0.109573	149.99	191.834	0.218124
1700013G24Rik	10.1055	9.54318	0.0556415	12.0113	16.0515	0.251704	0	23.3944	1
1700013H16Rik	9.32812	7.63455	0.181556	8.00752	3.2103	0.599089	22.1725	2.33944	0.894489
1700013N18Rik	16.3242	15.2691	0.0646354	14.0132	16.0515	0.126989	32.6066	4.67888	0.856505
1700014N06Rik	6.21875	5.72591	0.0792504	4.67105	2.56824	0.450179	5.21706	7.01832	0.256652
1700015E13Rik	19.4336	22.9036	0.151507	15.3477	13.4833	0.121482	6.52132	25.7338	0.746586
1700015F17Rik	13.9922	15.2691	0.083627	6.00564	9.63091	0.37642	0	9.35776	1
1700015G11Rik	16.3242	24.8123	0.342091	16.6823	7.70473	0.53815	5.21706	0	1
1700016C15Rik	24.875	30.5382	0.185446	32.0301	28.2507	0.117996	27.3895	4.67888	0.829173
1700016D06Rik	17.1016	19.0864	0.103991	16.015	7.70473	0.518907	35.2151	9.35776	0.734269
1700016G22Rik	11.6602	11.4518	0.0178671	18.0169	7.06267	0.607998	10.4341	21.055	0.504434
1700016H13Rik	52.8594	55.3505	0.0450059	72.0677	74.4791	0.0323765	59.9962	77.2015	0.222863
1700016H13Rik	52.8594	55.3505	0.0450059	72.0677	73.837	0.0239624	59.9962	77.2015	0.222863
1700016K19Rik	29.5391	30.5382	0.0327174	32.6974	43.6601	0.251093	56.0834	63.1649	0.112112
1700016L04Rik	137.59	34.3555	0.750305	245.564	283.149	0.132739	186.51	177.797	0.0467126
1700016L21Rik	17.8789	15.2691	0.145971	10.6767	7.06267	0.338497	5.21706	9.35776	0.442489
1700016M24Rik	17.1016	28.6295	0.402661	22.688	13.4833	0.405708	7.82558	30.4127	0.742687
1700016P04Rik	13.9922	9.54318	0.317963	8.67481	7.06267	0.185842	10.4341	11.6972	0.107982
1700017B05Rik	139.922	70.6196	0.495293	153.477	190.05	0.192436	343.021	294.769	0.140668
1700017D01Rik	18.6562	13.3605	0.283861	13.3459	8.98885	0.326469	22.1725	14.0366	0.366935
1700017G19Rik	24.0976	22.9036	0.0495489	38.703	39.1657	0.0118137	3.91279	11.6972	0.665493
1700017J07Rik	10.1055	15.2691	0.338175	13.3459	10.915	0.182141	13.0426	39.7705	0.672052
1700017N19Rik	18.6562	3.81727	0.795389	16.015	13.4833	0.158087	6.52132	16.3761	0.601778
1700018A04Rik	20.9883	9.54318	0.545309	13.3459	7.06267	0.470797	39.1279	4.67888	0.880421
1700018B08Rik	7.77344	22.9036	0.660603	16.6823	8.34679	0.499663	31.3023	9.35776	0.701052
1700018B24Rik	10.8828	9.54318	0.123096	8.67481	5.13649	0.407885	7.82558	30.4127	0.742687
1700018C11Rik	25.6523	15.2691	0.404768	27.359	27.6086	0.00904017	10.4341	35.0916	0.702661
1700018F24Rik	17.1016	15.2691	0.107152	10.6767	11.5571	0.0761784	19.564	14.0366	0.282526
1700018G05Rik	4.66406	9.54318	0.511268	6.00564	4.49443	0.251633	5.21706	16.3761	0.681422
1700018L02Rik	246.418	87.7973	0.643706	336.316	339.65	0.00981689	477.361	421.099	0.11786
1700018L24Rik	18.6562	19.0864	0.0225355	12.0113	13.4833	0.109172	9.12985	9.35776	0.0243552
1700019A02Rik	18.6562	1.90864	0.897694	15.3477	10.273	0.330653	5.21706	14.0366	0.628326
1700019B03Rik	19.4336	13.3605	0.312507	13.3459	18.6198	0.283242	0	30.4127	1
1700019B21Rik	7.77344	7.63455	0.0178671	6.00564	0.642061	0.89309	3.91279	7.01832	0.442489
1700019B21Rik	8.55078	5.72591	0.330364	6.67293	0.642061	0.903781	5.21706	4.67888	0.103157
1700019D03Rik	108.051	24.8123	0.770365	116.109	140.611	0.174255	104.341	74.8621	0.282526
1700019E08Rik	21.7656	11.4518	0.473857	14.6805	9.63091	0.343964	15.6512	14.0366	0.103157
1700019E19Rik	61.4101	26.7209	0.564878	104.765	109.15	0.0401765	56.0834	88.8987	0.369132
1700019G17Rik	47.418	30.5382	0.355978	106.1	136.759	0.224185	99.1241	58.486	0.409972
1700019G17Rik	73.8476	28.6295	0.612316	110.771	97.5933	0.118962	149.99	100.596	0.329318
1700019G24Rik	11.6602	11.4518	0.0178671	14.0132	5.77855	0.587634	5.21706	7.01832	0.256652
1700019L03Rik	19.4336	17.1777	0.11608	14.6805	27.6086	0.468265	20.8682	14.0366	0.327368
1700019M22Rik	19.4336	15.2691	0.214294	8.67481	5.77855	0.333871	7.82558	7.01832	0.103157
1700019N12Rik	28.7617	19.0864	0.336397	30.6955	50.7228	0.394838	29.9981	30.4127	0.0136338
1700019N19Rik	14.7695	30.5382	0.516359	14.6805	12.1992	0.169021	6.52132	25.7338	0.746586
1700019O17Rik	15.5469	28.6295	0.456964	16.6823	22.4721	0.257643	23.4768	7.01832	0.701052
1700020A23Rik	17.8789	22.9036	0.219386	7.34023	17.3356	0.576582	6.52132	18.7155	0.651555
1700020A23Rik	17.8789	24.8123	0.279433	7.34023	16.0515	0.542708	6.52132	18.7155	0.651555
1700020D05Rik	13.2148	24.8123	0.467407	16.6823	16.0515	0.0378133	14.3469	16.3761	0.123911
1700020G17Rik	19.4336	9.54318	0.508934	13.3459	8.34679	0.374579	22.1725	28.0733	0.210192
1700020I14Rik	174.125	70.6196	0.594432	284.267	294.706	0.0354215	211.291	308.806	0.315782
1700020L24Rik	17.1016	15.2691	0.107152	9.34211	14.7674	0.367383	3.91279	30.4127	0.871344
1700020M21Rik	16.3242	22.9036	0.287265	22.0207	15.4095	0.300228	11.7384	18.7155	0.3728
1700020N01Rik	12.4375	19.0864	0.348357	11.344	13.4833	0.158662	6.52132	21.055	0.690271
1700020N15Rik	3.88672	5.72591	0.321205	5.33835	3.2103	0.398633	5.21706	2.33944	0.551579
1700020N18Rik	26.4297	22.9036	0.133412	12.6786	13.4833	0.0596816	33.9109	32.7522	0.0341693
1700020O03Rik	139.922	59.1677	0.577137	188.844	229.858	0.178431	200.857	203.531	0.0131409
1700021C14Rik	202.887	64.8936	0.680148	250.235	293.422	0.147183	209.987	142.706	0.320405
1700021F05Rik	146.918	40.0814	0.727185	158.149	161.799	0.0225637	219.116	208.21	0.0497737
1700021F07Rik	17.8789	47.7159	0.625305	18.6842	14.7674	0.209632	13.0426	11.6972	0.103157
1700021K19Rik	79.289	32.4468	0.590778	122.782	149.6	0.179266	172.163	126.33	0.26622
1700021N21Rik	11.6602	15.2691	0.236356	18.6842	16.0515	0.140905	61.3004	16.3761	0.732855
1700022A21Rik	31.0937	17.1777	0.44755	16.015	11.5571	0.27836	16.9554	25.7338	0.341123
1700022A22Rik	18.6562	15.2691	0.181556	9.34211	8.34679	0.106541	19.564	9.35776	0.521684
1700022E09Rik	8.55078	9.54318	0.103991	12.0113	8.34679	0.305087	10.4341	11.6972	0.107982
1700022H16Rik	20.2109	15.2691	0.244513	23.3553	39.1657	0.403681	24.781	35.0916	0.293819
1700022I11Rik	19.4336	20.995	0.0743707	18.6842	8.34679	0.55327	13.0426	30.4127	0.571145
1700022P22Rik	17.8789	24.8123	0.279433	32.0301	46.8704	0.316625	74.3431	14.0366	0.811191
1700023A16Rik	20.2109	17.1777	0.150077	16.6823	12.8412	0.230251	16.9554	39.7705	0.573668
1700023C21Rik	12.4375	15.2691	0.185446	14.6805	5.13649	0.650114	36.5194	30.4127	0.167217
1700023E05Rik	19.4336	19.0864	0.0178671	22.688	25.0404	0.0939442	40.4322	49.1282	0.177007
1700023F02Rik	9.32812	5.72591	0.386167	8.67481	1.28412	0.851971	11.7384	18.7155	0.3728
1700023F06Rik	23.3203	24.8123	0.0601303	18.6842	10.273	0.450179	35.2151	11.6972	0.667836
1700023F06Rik	22.543	24.8123	0.0914593	18.6842	10.273	0.450179	35.2151	11.6972	0.667836
1700023L04Rik	43.5312	26.7209	0.386167	52.0489	47.5125	0.0871562	37.8237	11.6972	0.690744
1700024B18Rik	13.9922	15.2691	0.083627	15.3477	3.2103	0.790829	1.30426	25.7338	0.949317
1700024F13Rik	17.1016	13.3605	0.218758	12.0113	12.8412	0.0646306	6.52132	16.3761	0.601778
1700024G13Rik	17.8789	19.0864	0.0632632	20.6861	11.5571	0.441311	5.21706	14.0366	0.628326
1700024P03Rik	20.2109	24.8123	0.185446	16.6823	12.1992	0.268738	7.82558	7.01832	0.103157
1700024P04Rik	13.2148	20.995	0.370572	18.0169	11.5571	0.358542	11.7384	4.67888	0.601403
1700024P16Rik	40.4219	26.7209	0.338949	52.0489	64.8481	0.197373	76.9516	51.4677	0.331168
1700025B11Rik	13.2148	20.995	0.370572	12.6786	19.9039	0.36301	13.0426	9.35776	0.282526
1700025C18Rik	16.3242	17.1777	0.0496873	12.6786	12.1992	0.0378133	18.2597	9.35776	0.487518
1700025E21Rik	18.6562	11.4518	0.386167	14.0132	13.4833	0.0378133	10.4341	16.3761	0.362844
1700025E21Rik	118.934	45.8073	0.61485	180.169	177.209	0.0164314	91.2985	72.5226	0.205654
1700025F22Rik	24.875	9.54318	0.616354	14.6805	4.49443	0.69385	10.4341	14.0366	0.256652
1700025F24Rik	31.8711	19.0864	0.401139	20.0188	10.273	0.486834	16.9554	11.6972	0.310121
1700025G04Rik	108.051	41.99	0.611386	148.139	206.744	0.283464	393.888	294.769	0.251641
1700025K23Rik	48.1953	30.5382	0.366366	68.0639	82.1838	0.171808	74.3431	74.8621	0.00693296
1700025K24Rik	13.9922	11.4518	0.181556	12.6786	10.915	0.139096	9.12985	18.7155	0.512178
1700025M24Rik	15.5469	13.3605	0.140634	12.0113	12.1992	0.0154006	15.6512	37.431	0.581867
1700025N23Rik	10.1055	15.2691	0.338175	22.0207	14.7674	0.329385	14.3469	25.7338	0.442489
1700026D08Rik	19.4336	22.9036	0.151507	20.6861	11.5571	0.441311	5.21706	2.33944	0.551579
1700026D11Rik	13.9922	22.9036	0.389085	16.6823	11.5571	0.307226	16.9554	11.6972	0.310121
1700026F02Rik	17.8789	15.2691	0.145971	8.67481	9.63091	0.0992739	3.91279	11.6972	0.665493
1700026J04Rik	17.1016	26.7209	0.359993	14.0132	10.273	0.266905	10.4341	25.7338	0.594537
1700026L06Rik	22.543	28.6295	0.212598	25.3572	31.461	0.194013	50.8663	51.4677	0.0116845
1700027A15Rik	13.9922	13.3605	0.0451486	8.67481	5.77855	0.333871	11.7384	21.055	0.442489
1700027A15Rik	9.32812	11.4518	0.185446	11.344	3.2103	0.717004	3.91279	2.33944	0.402105
1700027A23Rik	17.1016	15.2691	0.107152	21.3534	21.8301	0.0218359	15.6512	16.3761	0.0442663
1700027A23Rik	15.5469	9.54318	0.386167	21.3534	12.8412	0.398633	9.12985	4.67888	0.487518
1700027D21Rik	18.6562	19.0864	0.0225355	11.344	14.1253	0.196905	5.21706	30.4127	0.828458
1700027F09Rik	15.5469	19.0864	0.185446	20.0188	32.7451	0.388647	15.6512	53.8071	0.709125
1700027H10Rik	10.8828	19.0864	0.429812	12.0113	7.06267	0.411997	0	2.33944	1
1700027I24Rik	11.6602	11.4518	0.0178671	10.6767	8.98885	0.158087	24.781	11.6972	0.527977
1700027J07Rik	15.5469	20.995	0.259497	10.0094	7.70473	0.230251	5.21706	18.7155	0.721244
1700028B04Rik	10.8828	19.0864	0.429812	14.0132	14.7674	0.0510745	14.3469	18.7155	0.233422
1700028D13Rik	16.3242	11.4518	0.298477	13.3459	13.4833	0.0101911	7.82558	21.055	0.628326
1700028E10Rik	174.125	36.2641	0.791735	210.865	228.574	0.0774759	163.033	126.33	0.225128
1700028E10Rik	174.125	36.2641	0.791735	210.865	228.574	0.0774759	163.033	126.33	0.225128
1700028I16Rik	34.2031	22.9036	0.330364	46.7105	58.4275	0.200539	78.2558	98.2565	0.203555
1700028J19Rik	20.2109	24.8123	0.185446	15.3477	15.4095	0.0040048	16.9554	4.67888	0.724048
1700028K03Rik	13.2148	11.4518	0.133412	16.015	12.1992	0.238269	16.9554	35.0916	0.516824
1700028K03Rik	13.2148	11.4518	0.133412	16.015	12.1992	0.238269	16.9554	35.0916	0.516824
1700028M03Rik	14.7695	17.1777	0.140193	13.3459	4.49443	0.663235	1.30426	16.3761	0.920356
1700028P14Rik	18.6562	19.0864	0.0225355	16.6823	7.06267	0.576638	13.0426	18.7155	0.303111
1700028P15Rik	13.2148	20.995	0.370572	14.0132	10.273	0.266905	5.21706	25.7338	0.797269
1700029B22Rik	14.7695	13.3605	0.095404	11.344	7.70473	0.320809	33.9109	2.33944	0.931012
1700029F09Rik	129.039	55.3505	0.571056	155.479	176.567	0.11943	198.248	152.064	0.232963
1700029F12Rik	10.1055	1.90864	0.811128	20.0188	10.915	0.454761	19.564	23.3944	0.163733
1700029F12Rik	10.1055	1.90864	0.811128	20.0188	10.915	0.454761	19.564	23.3944	0.163733
1700029G01Rik	134.48	45.8073	0.659376	226.88	266.455	0.148526	202.161	187.155	0.0742268
1700029G01Rik	153.914	45.8073	0.702384	211.532	242.699	0.128418	164.337	147.385	0.103157
1700029H14Rik	20.2109	11.4518	0.433385	16.015	8.98885	0.438724	39.1279	4.67888	0.880421
1700029I01Rik	35.7578	36.2641	0.0139612	32.6974	14.7674	0.548361	13.0426	25.7338	0.493172
1700029I15Rik	12.4375	19.0864	0.348357	21.3534	21.8301	0.0218359	5.21706	9.35776	0.442489
1700029J03Rik	10.1055	26.7209	0.621814	17.3496	13.4833	0.222849	16.9554	16.3761	0.0341693
1700029J07Rik	105.719	43.8986	0.58476	174.164	193.902	0.101798	134.339	138.027	0.0267175
1700029J11Rik	7.77344	13.3605	0.418176	8.67481	13.4833	0.356624	44.345	28.0733	0.366935
1700029M20Rik	18.6562	24.8123	0.248104	12.6786	8.34679	0.341662	5.21706	0	1
1700029N11Rik	13.2148	32.4468	0.592723	15.3477	10.915	0.288819	31.3023	35.0916	0.107982
1700029P11Rik	12.4375	22.9036	0.456964	14.0132	3.2103	0.770908	32.6066	0	1
1700030A11Rik	17.8789	20.995	0.148421	28.6936	26.3245	0.0825662	29.9981	16.3761	0.454096
1700030C10Rik	52.8594	19.0864	0.638922	53.3835	41.0919	0.230251	83.4729	49.1282	0.411447
1700030F04Rik	17.1016	28.6295	0.402661	16.015	6.42061	0.599089	19.564	16.3761	0.162947
1700030F18Rik	15.5469	7.63455	0.508934	15.3477	12.8412	0.163316	16.9554	0	1
1700030J22Rik	36.5351	43.8986	0.167739	59.3891	71.9108	0.174128	54.7791	46.7888	0.145864
1700030K09Rik	24.875	40.0814	0.379388	38.703	55.2172	0.299077	70.4303	70.1832	0.00350803
1700030L20Rik	11.6602	13.3605	0.127264	12.6786	4.49443	0.64551	11.7384	2.33944	0.800702
1700030M09Rik	16.3242	26.7209	0.389085	18.0169	12.8412	0.287269	28.6938	23.3944	0.184688
1700030N03Rik	20.2109	3.81727	0.811128	12.6786	14.7674	0.141448	22.1725	23.3944	0.0522308
1700030O20Rik	19.4336	13.3605	0.312507	17.3496	4.49443	0.74095	22.1725	14.0366	0.366935
1700031A10Rik	24.0976	17.1777	0.287162	22.0207	16.0515	0.271071	19.564	4.67888	0.760842
1700031F05Rik	7.77344	9.54318	0.185446	4.67105	1.92618	0.587634	2.60853	7.01832	0.628326
1700031M16Rik	18.6562	5.72591	0.693083	11.344	10.915	0.0378133	0	4.67888	1
1700031P21Rik	446.195	70.6196	0.841729	744.032	760.842	0.0220939	479.969	313.485	0.346864
1700034E13Rik	16.3242	15.2691	0.0646354	10.0094	5.77855	0.422688	10.4341	9.35776	0.103157
1700034F02Rik	279.066	43.8986	0.842695	410.385	383.952	0.0644103	221.725	182.476	0.177015
1700034G24Rik	20.9883	15.2691	0.272494	10.6767	8.98885	0.158087	3.91279	18.7155	0.790933
1700034H14Rik	120.488	24.8123	0.794069	198.853	211.88	0.0614812	126.514	98.2565	0.223353
1700034H15Rik	150.027	78.2541	0.478401	151.476	228.574	0.337301	269.983	198.852	0.263462
1700034I23Rik	13.2148	19.0864	0.307629	19.3515	23.7563	0.185414	13.0426	23.3944	0.442489
1700034J05Rik	10.8828	38.1727	0.714906	18.0169	14.7674	0.180359	20.8682	7.01832	0.663684
1700034K08Rik	10.8828	26.7209	0.592723	14.6805	1.28412	0.912528	1.30426	28.0733	0.953541
1700034O15Rik	16.3242	19.0864	0.144719	12.0113	5.13649	0.572361	9.12985	25.7338	0.64522
1700034P13Rik	239.422	83.98	0.649238	303.619	346.071	0.122669	337.804	308.806	0.0858437
1700036G14Rik	22.543	24.8123	0.0914593	8.00752	11.5571	0.307134	20.8682	23.3944	0.107982
1700037C18Rik	143.031	38.1727	0.733116	184.84	245.267	0.246372	131.731	119.311	0.0942776
1700037H04Rik	72.2929	51.5332	0.287162	97.4248	125.202	0.221858	82.1686	135.688	0.394427
1700039E15Rik	17.8789	13.3605	0.252725	16.015	11.5571	0.27836	26.0853	18.7155	0.282526
1700039E22Rik	23.3203	9.54318	0.590778	13.3459	16.0515	0.168561	16.9554	32.7522	0.482311
1700040I03Rik	297.723	72.5282	0.75639	335.649	389.089	0.137347	451.275	257.338	0.429753
1700040I03Rik	272.07	62.985	0.768497	320.968	356.986	0.100894	367.802	166.1	0.548398
1700040L02Rik	94.0586	38.1727	0.59416	112.773	91.8147	0.185842	95.2113	37.431	0.606863
1700040N02Rik	19.4336	13.3605	0.312507	23.3553	22.4721	0.0378133	10.4341	9.35776	0.103157
1700041C23Rik	12.4375	13.3605	0.0690814	20.6861	11.5571	0.441311	18.2597	25.7338	0.29044
1700041M19Rik	17.8789	19.0864	0.0632632	18.0169	10.273	0.429815	1.30426	23.3944	0.944249
1700042B14Rik	7.77344	3.81727	0.508934	11.344	5.13649	0.547206	1.30426	2.33944	0.442489
1700042G07Rik	20.2109	22.9036	0.117567	23.3553	18.6198	0.20276	10.4341	18.7155	0.442489
1700042G15Rik	16.3242	26.7209	0.389085	14.6805	21.188	0.307134	18.2597	7.01832	0.615639
1700042O10Rik	11.6602	20.995	0.444622	17.3496	14.1253	0.185842	16.9554	0	1
1700044C05Rik	13.9922	26.7209	0.476358	12.6786	5.77855	0.544227	6.52132	9.35776	0.303111
1700044K03Rik	13.9922	17.1777	0.185446	8.00752	8.34679	0.0406468	15.6512	11.6972	0.252631
1700045H11Rik	298.5	68.7109	0.769813	687.312	580.423	0.155518	965.155	477.246	0.505525
1700045I19Rik	5.4414	11.4518	0.524844	10.6767	9.63091	0.09795	3.91279	0	1
1700046C09Rik	15.5469	22.9036	0.321205	11.344	11.5571	0.0184395	9.12985	4.67888	0.487518
1700047G03Rik	18.6562	15.2691	0.181556	14.0132	14.7674	0.0510745	1.30426	7.01832	0.814163
1700047I17Rik2	118.156	57.2591	0.515395	158.816	184.914	0.141135	110.862	135.688	0.182958
1700047I17Rik2	111.937	45.8073	0.590778	162.152	178.493	0.0915477	133.035	123.99	0.0679869
1700047L14Rik	17.1016	22.9036	0.253326	8.67481	7.70473	0.111828	2.60853	25.7338	0.898634
1700047M11Rik	15.5469	3.81727	0.754467	14.6805	7.70473	0.475171	39.1279	16.3761	0.581473
1700048M11Rik	18.6562	17.1777	0.0792504	14.6805	9.63091	0.343964	35.2151	23.3944	0.335672
1700048O20Rik	13.2148	22.9036	0.423024	16.6823	11.5571	0.307226	22.1725	18.7155	0.155913
1700049E15Rik	14.7695	19.0864	0.226174	14.0132	9.63091	0.312724	10.4341	2.33944	0.775789
1700049E22Rik	29.5391	28.6295	0.0307899	18.6842	17.3356	0.0721771	31.3023	39.7705	0.212925
1700049G17Rik	90.9492	34.3555	0.622257	137.462	155.379	0.115307	136.948	112.293	0.180029
1700049L16Rik	12.4375	15.2691	0.185446	16.6823	0.642061	0.961513	0	9.35776	1
1700051A21Rik	21.7656	26.7209	0.185446	21.3534	30.1769	0.292392	16.9554	18.7155	0.0940441
1700052I22Rik	33.4258	22.9036	0.314791	24.0226	34.6713	0.307134	44.345	28.0733	0.366935
1700052K11Rik	644.418	181.32	0.718629	790.743	791.019	0.000349258	1267.74	1057.43	0.165899
1700052N19Rik	191.227	59.1677	0.690588	244.897	318.462	0.231002	220.421	123.99	0.437483
1700054A03Rik	31.8711	38.1727	0.165082	29.3609	38.5237	0.237847	45.6492	23.3944	0.487518
1700054K19Rik	14.7695	17.1777	0.140193	15.3477	19.2618	0.203204	40.4322	4.67888	0.884278
1700054M17Rik	23.3203	20.995	0.0997115	19.3515	17.9777	0.0709922	7.82558	0	1
1700054N08Rik	30.3164	32.4468	0.0656589	68.7312	84.752	0.189032	134.339	74.8621	0.442738
1700054O13Rik	6.99609	11.4518	0.389085	7.34023	7.70473	0.0473089	0	4.67888	1
1700055C04Rik	17.1016	24.8123	0.310762	15.3477	14.1253	0.0796475	37.8237	28.0733	0.257785
1700055N04Rik	17.1016	22.9036	0.253326	20.6861	26.9666	0.232898	40.4322	86.5593	0.532896
1700056E22Rik	237.867	116.427	0.510538	266.917	327.451	0.184863	349.543	224.586	0.357486
1700057G04Rik	6.99609	13.3605	0.476358	16.6823	8.98885	0.461175	10.4341	39.7705	0.737642
1700057H15Rik	14.7695	19.0864	0.226174	12.0113	12.1992	0.0154006	13.0426	23.3944	0.442489
1700057K13Rik	14.7695	22.9036	0.355145	16.6823	7.70473	0.53815	9.12985	25.7338	0.64522
1700058G18Rik	17.1016	17.1777	0.00443431	10.6767	9.63091	0.09795	23.4768	7.01832	0.701052
1700060C16Rik	10.8828	11.4518	0.0496873	8.67481	4.49443	0.481899	44.345	9.35776	0.788978
1700060C20Rik	24.875	11.4518	0.539625	21.3534	30.1769	0.292392	28.6938	14.0366	0.510813
1700061F12Rik	10.1055	15.2691	0.338175	9.34211	6.42061	0.312724	31.3023	9.35776	0.701052
1700061G19Rik	21.7656	22.9036	0.0496873	21.3534	16.0515	0.248292	14.3469	35.0916	0.591158
1700061I17Rik	20.9883	13.3605	0.363432	13.3459	5.13649	0.615125	13.0426	7.01832	0.461894
1700061J05Rik	18.6562	19.0864	0.0225355	14.6805	12.1992	0.169021	2.60853	16.3761	0.840711
1700061J05Rik	16.3242	19.0864	0.144719	24.0226	15.4095	0.358542	20.8682	7.01832	0.663684
1700063A18Rik	8.55078	24.8123	0.655381	10.6767	5.77855	0.45877	5.21706	7.01832	0.256652
1700063D05Rik	18.6562	19.0864	0.0225355	17.3496	12.1992	0.296864	33.9109	14.0366	0.586073
1700063O14Rik	14.7695	17.1777	0.140193	20.6861	16.6936	0.193005	22.1725	21.055	0.0504018
1700064J06Rik	20.2109	28.6295	0.294053	10.0094	12.1992	0.179501	13.0426	16.3761	0.203555
1700064M15Rik	13.9922	19.0864	0.266902	28.0263	24.3983	0.12945	39.1279	77.2015	0.493172
1700065D16Rik	113.492	36.2641	0.68047	141.466	143.18	0.0119665	142.165	126.33	0.111385
1700065I16Rik	20.2109	19.0864	0.0556415	10.6767	9.63091	0.09795	22.1725	28.0733	0.210192
1700065I17Rik	11.6602	19.0864	0.389085	12.0113	7.06267	0.411997	27.3895	37.431	0.268266
1700065J11Rik	13.2148	19.0864	0.307629	16.6823	20.5459	0.188047	6.52132	21.055	0.690271
1700065J18Rik	14.7695	24.8123	0.404749	14.0132	14.1253	0.00794154	46.9535	21.055	0.551579
1700065O20Rik	18.6562	11.4518	0.386167	24.6899	10.273	0.583919	3.91279	18.7155	0.790933
1700066B17Rik	16.3242	17.1777	0.0496873	13.3459	14.1253	0.0551824	16.9554	35.0916	0.516824
1700066B19Rik	59.0781	49.6245	0.160018	70.7331	80.2576	0.118674	93.907	98.2565	0.0442663
1700066J24Rik	25.6523	22.9036	0.107152	14.0132	12.1992	0.12945	11.7384	25.7338	0.543854
1700066M21Rik	114.269	38.1727	0.665941	165.489	167.578	0.0124665	151.295	191.834	0.211325
1700066N21Rik	18.6562	13.3605	0.283861	12.6786	12.1992	0.0378133	7.82558	18.7155	0.581867
1700066O22Rik	19.4336	13.3605	0.312507	11.344	15.4095	0.26383	26.0853	7.01832	0.730947
1700067G17Rik	74.625	24.8123	0.667507	99.4267	113.645	0.12511	39.1279	35.0916	0.103157
1700067K01Rik	16.3242	28.6295	0.429812	14.6805	25.0404	0.413729	23.4768	46.7888	0.49824
1700067P10Rik	20.9883	15.2691	0.272494	10.0094	10.915	0.0829712	24.781	28.0733	0.117274
1700069L16Rik	13.9922	17.1777	0.185446	17.3496	17.9777	0.0349363	18.2597	9.35776	0.487518
1700069P05Rik	13.2148	17.1777	0.230699	13.3459	9.63091	0.27836	16.9554	14.0366	0.172145
1700071K01Rik	14.7695	3.81727	0.741544	10.6767	5.77855	0.45877	15.6512	37.431	0.581867
1700071M16Rik	13.2148	11.4518	0.133412	12.6786	11.5571	0.0884547	10.4341	21.055	0.504434
1700072B07Rik	15.5469	32.4468	0.520851	13.3459	19.9039	0.329484	7.82558	16.3761	0.522133
1700072O05Rik	21.7656	15.2691	0.298477	17.3496	12.8412	0.259856	10.4341	14.0366	0.256652
1700073E17Rik	20.9883	15.2691	0.272494	16.6823	9.63091	0.422688	19.564	21.055	0.0708145
1700074H08Rik	21.7656	9.54318	0.561548	19.3515	14.7674	0.236886	10.4341	11.6972	0.107982
1700074P13Rik	12.4375	32.4468	0.616681	14.0132	5.13649	0.633453	7.82558	30.4127	0.742687
1700080E11Rik	10.8828	20.995	0.481648	10.6767	7.06267	0.338497	15.6512	35.0916	0.553991
1700080N15Rik	17.8789	13.3605	0.252725	14.6805	10.273	0.300228	29.9981	7.01832	0.766041
1700080O16Rik	6.21875	5.72591	0.0792504	3.33647	3.2103	0.0378133	22.1725	7.01832	0.683467
1700081H04Rik	17.1016	22.9036	0.253326	14.6805	8.98885	0.387699	32.6066	51.4677	0.366464
1700081H22Rik	10.1055	15.2691	0.338175	11.344	1.28412	0.886802	7.82558	0	1
1700081L11Rik	517.711	131.696	0.745619	633.929	653.618	0.0301234	1167.32	881.969	0.244448
1700084C01Rik	14.7695	19.0864	0.226174	20.0188	16.0515	0.198178	15.6512	11.6972	0.252631
1700084E18Rik	237.867	83.98	0.646946	336.983	403.856	0.165586	524.314	386.008	0.263786
1700084F23Rik	20.9883	19.0864	0.0906177	10.0094	8.98885	0.101959	10.4341	9.35776	0.103157
1700084J12Rik	14.7695	24.8123	0.404749	14.6805	7.06267	0.518907	11.7384	4.67888	0.601403
1700085B03Rik	16.3242	15.2691	0.0646354	14.6805	16.0515	0.0854166	32.6066	16.3761	0.497768
1700085C21Rik	11.6602	20.995	0.444622	12.6786	9.63091	0.240379	15.6512	4.67888	0.701052
1700086L19Rik	11.6602	11.4518	0.0178671	15.3477	20.5459	0.253004	28.6938	16.3761	0.429282
1700086O06Rik	219.988	72.5282	0.670309	267.585	297.274	0.0998725	170.859	208.21	0.179393
1700086O06Rik	186.562	61.0764	0.672622	212.867	231.142	0.0790653	144.773	170.779	0.152277
1700088E04Rik	101.832	57.2591	0.43771	177.5	182.987	0.0299873	159.12	107.614	0.323692
1700090G07Rik	20.2109	20.995	0.0373456	16.015	10.915	0.318451	9.12985	35.0916	0.739828
1700091E21Rik	10.8828	22.9036	0.524844	8.67481	13.4833	0.356624	20.8682	9.35776	0.551579
1700092C02Rik	15.5469	9.54318	0.386167	16.6823	8.34679	0.499663	22.1725	16.3761	0.261424
1700092C10Rik	15.5469	11.4518	0.2634	12.6786	8.34679	0.341662	16.9554	7.01832	0.586073
1700092E19Rik	11.6602	13.3605	0.127264	12.6786	5.13649	0.594869	14.3469	7.01832	0.510813
1700092K14Rik	7.77344	19.0864	0.592723	12.6786	17.9777	0.294761	9.12985	21.055	0.56638
1700092M07Rik	31.0937	38.1727	0.185446	37.3684	67.4164	0.445707	54.7791	44.4494	0.188571
1700093K21Rik	20.9883	13.3605	0.363432	14.0132	10.273	0.266905	18.2597	21.055	0.13276
1700093K21Rik	25.6523	13.3605	0.479172	14.6805	8.34679	0.431435	18.2597	11.6972	0.359398
1700094D03Rik	17.8789	15.2691	0.145971	15.3477	19.9039	0.228907	10.4341	35.0916	0.702661
1700094J05Rik	17.1016	11.4518	0.330364	19.3515	15.4095	0.203708	23.4768	23.3944	0.00350803
1700094M24Rik	16.3242	19.0864	0.144719	12.6786	5.13649	0.594869	19.564	16.3761	0.162947
1700095A21Rik	24.0976	30.5382	0.210901	16.6823	7.06267	0.576638	13.0426	18.7155	0.303111
1700095B10Rik	20.9883	22.9036	0.083627	10.6767	8.98885	0.158087	11.7384	25.7338	0.543854
1700095B22Rik	27.9844	17.1777	0.386167	20.6861	19.2618	0.0688516	32.6066	32.7522	0.00444407
1700096J18Rik	31.8711	24.8123	0.22148	22.0207	50.0807	0.560296	58.6919	46.7888	0.202806
1700096K18Rik	328.039	97.3405	0.703266	388.365	482.83	0.195649	456.492	299.448	0.344024
1700097N02Rik	44.3086	40.0814	0.095404	28.6936	43.0181	0.332987	15.6512	30.4127	0.485374
1700100L14Rik	20.9883	17.1777	0.181556	14.0132	8.98885	0.358542	13.0426	0	1
1700101E01Rik	39.6445	20.995	0.470419	72.735	82.8259	0.121832	75.6473	39.7705	0.474265
1700101E01Rik	39.6445	20.995	0.470419	72.735	82.8259	0.121832	75.6473	39.7705	0.474265
1700101I11Rik	80.8437	11.4518	0.858346	150.141	186.198	0.193647	133.035	60.8254	0.542786
1700101O22Rik	15.5469	3.81727	0.754467	8.67481	4.49443	0.481899	9.12985	25.7338	0.64522
1700102H20Rik	108.828	43.8986	0.596624	134.793	121.992	0.0949729	63.9089	67.8438	0.0579981
1700102P08Rik	13.9922	24.8123	0.436078	17.3496	15.4095	0.111828	6.52132	11.6972	0.442489
1700104A03Rik	26.4297	5.72591	0.783353	12.0113	9.63091	0.198178	2.60853	28.0733	0.907081
1700105P06Rik	208.328	59.1677	0.715988	288.938	318.462	0.0927084	341.717	339.219	0.00731143
1700106J16Rik	13.9922	15.2691	0.083627	12.0113	17.3356	0.307134	13.0426	21.055	0.380543
1700106N22Rik	212.215	61.0764	0.712196	270.254	344.787	0.216171	275.2	166.1	0.396438
1700108F19Rik	17.1016	3.81727	0.776788	20.0188	16.6936	0.166105	41.7365	16.3761	0.607631
1700108J01Rik	16.3242	22.9036	0.287265	13.3459	12.1992	0.0859226	33.9109	32.7522	0.0341693
1700108M19Rik	14.7695	13.3605	0.095404	17.3496	11.5571	0.333871	6.52132	32.7522	0.800889
1700108M19Rik	13.2148	15.2691	0.134537	18.0169	7.70473	0.572361	9.12985	21.055	0.56638
1700109F18Rik	14.7695	22.9036	0.355145	19.3515	21.188	0.0866763	24.781	23.3944	0.055955
1700109G14Rik	19.4336	13.3605	0.312507	17.3496	9.63091	0.444892	0	30.4127	1
1700109G15Rik	17.1016	20.995	0.185446	11.344	3.85237	0.660405	18.2597	18.7155	0.0243552
1700109H08Rik	12.4375	19.0864	0.348357	14.6805	10.915	0.256492	26.0853	4.67888	0.820631
1700109I08Rik	17.1016	19.0864	0.103991	10.0094	3.2103	0.679271	10.4341	0	1
1700110C19Rik	10.1055	11.4518	0.117567	8.67481	1.28412	0.851971	7.82558	9.35776	0.163733
1700110I01Rik	17.8789	19.0864	0.0632632	10.0094	7.70473	0.230251	10.4341	25.7338	0.594537
1700110I01Rik	13.2148	9.54318	0.277843	14.0132	7.06267	0.495997	13.0426	23.3944	0.442489
1700110I01Rik	7.77344	22.9036	0.660603	15.3477	3.2103	0.790829	9.12985	16.3761	0.442489
1700110K17Rik	17.1016	30.5382	0.439994	31.3628	53.2911	0.411481	40.4322	23.3944	0.421392
1700110M21Rik	14.7695	15.2691	0.0327174	13.3459	5.77855	0.567016	31.3023	14.0366	0.551579
1700111N16Rik	3.88672	15.2691	0.745452	10.6767	5.13649	0.518907	6.52132	0	1
1700112E06Rik	28.7617	40.0814	0.282417	39.3703	44.3022	0.111324	32.6066	44.4494	0.266432
1700112H15Rik	10.1055	17.1777	0.411711	11.344	10.273	0.0944125	11.7384	4.67888	0.601403
1700113A16Rik	173.348	51.5332	0.702718	264.915	304.337	0.129532	221.725	159.082	0.282526
1700113H08Rik	17.8789	15.2691	0.145971	16.6823	10.273	0.384201	6.52132	21.055	0.690271
1700113I22Rik	108.828	53.4418	0.508934	195.517	229.216	0.147018	185.206	95.917	0.482105
1700119H24Rik	41.1992	30.5382	0.258768	81.4098	136.117	0.401913	122.601	112.293	0.0840755
1700120C14Rik	135.258	45.8073	0.661333	218.205	275.444	0.207807	262.157	145.045	0.446724
1700120E14Rik	23.3203	19.0864	0.181556	26.0244	15.4095	0.407885	26.0853	16.3761	0.37221
1700120G07Rik	6.21875	7.63455	0.185446	8.00752	11.5571	0.307134	16.9554	11.6972	0.310121
1700120K04Rik	15.5469	17.1777	0.0949403	12.0113	16.0515	0.251704	39.1279	7.01832	0.820631
1700121L16Rik	6.99609	13.3605	0.476358	4.67105	5.13649	0.0906131	20.8682	2.33944	0.887895
1700121N20Rik	12.4375	15.2691	0.185446	13.3459	4.49443	0.663235	35.2151	23.3944	0.335672
1700122O11Rik	19.4336	19.0864	0.0178671	20.6861	26.3245	0.214188	27.3895	39.7705	0.31131
1700123I01Rik	11.6602	13.3605	0.127264	18.0169	17.9777	0.00217675	41.7365	35.0916	0.15921
1700123K08Rik	20.2109	15.2691	0.244513	14.0132	6.42061	0.541816	14.3469	4.67888	0.673875
1700123L14Rik	13.2148	13.3605	0.010899	12.0113	7.06267	0.411997	14.3469	0	1
1700123M08Rik	126.707	61.0764	0.517972	144.803	144.464	0.00234098	216.508	138.027	0.362485
1700123O12Rik	14.7695	11.4518	0.224632	14.0132	10.915	0.221087	1.30426	9.35776	0.860622
1700123O20Rik	295.391	80.1627	0.728621	399.709	364.049	0.0892156	451.275	283.072	0.372728
1700123O21Rik	17.1016	9.54318	0.44197	16.6823	6.42061	0.615125	7.82558	11.6972	0.330986
1700125D06Rik	32.6484	38.1727	0.144719	24.6899	17.9777	0.271859	32.6066	23.3944	0.282526
1700125G02Rik	16.3242	19.0864	0.144719	16.015	14.1253	0.117996	43.0407	4.67888	0.891292
1700125G22Rik	172.57	30.5382	0.823039	204.859	184.271	0.100496	204.769	208.21	0.016525
1700125H03Rik	12.4375	34.3555	0.637976	15.3477	25.6824	0.402403	1.30426	23.3944	0.944249
1700125H03Rik	12.4375	34.3555	0.637976	15.3477	25.6824	0.402403	1.30426	23.3944	0.944249
1700125H20Rik	23.3203	20.995	0.0997115	22.688	25.6824	0.116596	27.3895	44.4494	0.383803
1700126H18Rik	16.3242	26.7209	0.389085	10.6767	10.915	0.0218359	36.5194	9.35776	0.743759
1700128A07Rik	16.3242	15.2691	0.0646354	9.34211	10.273	0.0906131	0	28.0733	1
1700128F08Rik	14.7695	20.995	0.296522	7.34023	6.42061	0.125285	13.0426	11.6972	0.103157
1700129C05Rik	18.6562	19.0864	0.0225355	9.34211	8.34679	0.106541	15.6512	7.01832	0.551579
1810006J02Rik	20.9883	19.0864	0.0906177	17.3496	14.7674	0.148835	9.12985	23.3944	0.609742
1810006K21Rik	43.5312	19.0864	0.561548	343.656	389.731	0.118222	44.345	67.8438	0.346366
1810006K21Rik	235.535	72.5282	0.692071	68.0639	69.3426	0.0184395	276.504	264.357	0.0439318
1810007C17Rik	14.7695	7.63455	0.483088	8.67481	4.49443	0.481899	15.6512	7.01832	0.551579
1810007D17Rik	13.9922	20.995	0.333547	10.6767	0.642061	0.939863	7.82558	18.7155	0.581867
1810007I06Rik	41.1992	20.995	0.490403	34.032	41.734	0.18455	53.4748	49.1282	0.081283
1810008A18Rik	162.465	53.4418	0.671056	232.218	329.377	0.294978	264.766	247.981	0.0633957
1810008I18Rik	22.543	17.1777	0.238	25.3572	21.8301	0.139096	31.3023	21.055	0.327368
1810009A15Rik	198.223	47.7159	0.759281	308.957	334.514	0.0764	238.68	170.779	0.284486
1810009J06Rik	13.2148	19.0864	0.307629	22.688	8.34679	0.632105	14.3469	28.0733	0.488948
1810010D01Rik	24.875	24.8123	0.00252132	23.3553	21.188	0.0927954	26.0853	39.7705	0.344104
1810010H24Rik	125.93	43.8986	0.651403	186.175	221.511	0.159523	224.333	72.5226	0.676719
1810011H11Rik	11.6602	17.1777	0.321205	19.3515	14.1253	0.270065	46.9535	35.0916	0.252631
1810011O10Rik	293.059	80.1627	0.726462	435.075	420.55	0.0333861	262.157	292.43	0.103522
1810012K16Rik	272.848	74.4368	0.727185	447.087	426.97	0.0449938	742.126	517.016	0.303331
1810012P15Rik	73.8476	26.7209	0.638162	104.098	121.35	0.142166	136.948	98.2565	0.282526
1810013A23Rik	129.039	66.8023	0.482309	150.808	193.902	0.222246	153.903	156.742	0.0181144
1810013D10Rik	184.23	72.5282	0.606318	269.587	272.234	0.00972422	297.372	238.623	0.197562
1810013L24Rik	323.375	120.244	0.628159	458.431	380.1	0.170867	766.907	533.392	0.304489
1810014B01Rik	134.48	41.99	0.687761	134.793	165.652	0.186285	110.862	145.045	0.23567
1810014F10Rik	55.9687	24.8123	0.556676	64.7275	78.3314	0.173672	118.688	114.633	0.0341693
1810018F18Rik	15.5469	17.1777	0.0949403	14.0132	10.273	0.266905	29.9981	2.33944	0.922014
1810019D21Rik	69.9609	57.2591	0.181556	130.79	157.947	0.17194	109.558	100.596	0.0818038
1810019J16Rik	203.664	70.6196	0.653255	309.624	346.713	0.106972	490.403	428.117	0.127009
1810020D17Rik	245.641	82.0714	0.665888	350.996	481.546	0.271105	635.177	540.411	0.149196
1810020O05Rik	14.7695	30.5382	0.516359	12.0113	8.34679	0.305087	10.4341	18.7155	0.442489
1810021B22Rik	451.637	112.61	0.750663	611.241	570.15	0.0672251	996.458	624.63	0.373149
1810022K09Rik	161.687	34.3555	0.787519	236.222	215.09	0.0894561	101.733	123.99	0.179512
1810024B03Rik	124.375	59.1677	0.524279	180.837	234.994	0.230464	100.428	109.954	0.0866304
1810026B05Rik	720.597	206.133	0.713942	894.84	896.317	0.00164727	2009.87	1359.21	0.32373
1810026J23Rik	149.25	55.3505	0.629143	222.876	264.529	0.157461	271.287	173.119	0.361862
1810027O10Rik	96.3906	36.2641	0.62378	101.429	159.231	0.36301	130.426	88.8987	0.318399
1810029B16Rik	92.5039	40.0814	0.566706	134.793	158.589	0.150047	122.601	86.5593	0.293975
1810030J14Rik	6.21875	13.3605	0.534541	18.6842	8.98885	0.518907	7.82558	7.01832	0.103157
1810030N24Rik	94.0586	24.8123	0.736204	133.459	191.334	0.302484	131.731	95.917	0.27187
1810030O07Rik	100.277	26.7209	0.73353	134.793	147.674	0.0872241	110.862	63.1649	0.430241
1810031K17Rik	231.648	70.6196	0.695143	342.989	423.118	0.189378	356.064	269.036	0.244418
1810032O08Rik	115.047	17.1777	0.850689	163.487	191.334	0.145542	169.554	128.669	0.241133
1810033B17Rik	17.8789	7.63455	0.572986	16.015	13.4833	0.158087	1.30426	18.7155	0.930311
1810034E14Rik	106.496	36.2641	0.659479	150.808	161.157	0.0642165	119.992	84.2198	0.298123
1810035I16Rik	21.7656	19.0864	0.123096	12.6786	23.7563	0.466306	23.4768	7.01832	0.701052
1810035L17Rik	171.016	40.0814	0.765627	314.295	324.883	0.032589	318.24	224.586	0.294288
1810037I17Rik	107.273	28.6295	0.733116	138.13	232.426	0.405705	147.382	98.2565	0.33332
1810041L15Rik	15.5469	15.2691	0.0178671	10.6767	3.2103	0.699317	5.21706	39.7705	0.868821
1810043G02Rik	31.0937	36.2641	0.142575	33.3647	45.5863	0.268099	54.7791	60.8254	0.0994048
1810043H04Rik	301.609	80.1627	0.734217	407.716	439.17	0.07162	433.016	327.522	0.243627
1810044D09Rik	104.164	22.9036	0.78012	191.513	224.079	0.145333	112.167	107.614	0.0405868
1810046J19Rik	86.2851	38.1727	0.557598	139.464	157.305	0.113414	149.99	88.8987	0.407304
1810046K07Rik	14.7695	15.2691	0.0327174	17.3496	12.8412	0.259856	3.91279	14.0366	0.721244
1810048J11Rik	36.5351	36.2641	0.00741892	36.7011	46.2284	0.206091	26.0853	21.055	0.192842
1810049H13Rik	160.133	62.985	0.60667	206.194	326.167	0.367828	225.638	264.357	0.146465
1810053B23Rik	16.3242	19.0864	0.144719	11.344	14.1253	0.196905	10.4341	16.3761	0.362844
1810053B23Rik	16.3242	19.0864	0.144719	14.0132	13.4833	0.0378133	10.4341	16.3761	0.362844
1810053B23Rik	20.9883	28.6295	0.266902	14.6805	13.4833	0.0815491	11.7384	16.3761	0.2832
1810053B23Rik	16.3242	22.9036	0.287265	16.015	14.7674	0.0779044	14.3469	16.3761	0.123911
1810053B23Rik	20.9883	30.5382	0.31272	16.015	14.7674	0.0779044	14.3469	16.3761	0.123911
1810053B23Rik	20.2109	34.3555	0.411711	17.3496	9.63091	0.444892	16.9554	9.35776	0.448097
1810055G02Rik	136.035	45.8073	0.663269	258.91	153.453	0.407313	279.113	208.21	0.254028
1810058I24Rik	84.7304	36.2641	0.572006	124.117	157.305	0.210981	67.8217	161.421	0.579847
1810058I24Rik	87.0625	36.2641	0.58347	123.449	154.095	0.198873	67.8217	161.421	0.579847
1810062G17Rik	70.7383	38.1727	0.460367	50.047	66.7743	0.250505	37.8237	58.486	0.353287
1810062O18Rik	293.836	78.2541	0.733681	371.682	428.255	0.132099	466.927	435.136	0.0680852
1810063B05Rik	120.488	47.7159	0.603979	182.171	204.817	0.110568	116.08	81.8804	0.294618
1810063B07Rik	138.367	53.4418	0.613768	197.519	229.858	0.140691	186.51	91.2381	0.510813
1810064F22Rik	23.3203	26.7209	0.127264	30.6955	41.0919	0.253004	31.3023	23.3944	0.252631
1810065E05Rik	20.9883	17.1777	0.181556	16.015	12.8412	0.198178	29.9981	37.431	0.198577
1810074P20Rik	140.699	34.3555	0.755823	208.863	177.209	0.151554	233.463	86.5593	0.629238
2010001E11Rik	64.5195	36.2641	0.437936	104.765	104.656	0.00104183	97.8198	109.954	0.110354
2010001M06Rik	115.047	36.2641	0.684788	127.453	145.748	0.125523	249.114	140.366	0.436539
2010001M09Rik	20.2109	22.9036	0.117567	14.0132	14.1253	0.00794154	3.91279	7.01832	0.442489
2010002M12Rik	35.7578	36.2641	0.0139612	66.7293	116.213	0.425801	84.7772	86.5593	0.0205882
2010002N04Rik	93.2812	28.6295	0.693083	120.113	130.98	0.0829712	89.9942	98.2565	0.0840885
2010003K11Rik	238.644	64.8936	0.728074	509.812	333.23	0.346368	882.987	346.237	0.60788
2010003K15Rik	56.7461	45.8073	0.192768	120.113	123.276	0.0256569	156.512	74.8621	0.521684
2010003O02Rik	300.055	93.5232	0.688313	465.104	481.546	0.0341445	396.496	402.384	0.0146312
2010005H15Rik	18.6562	13.3605	0.283861	21.3534	12.8412	0.398633	3.91279	21.055	0.814163
2010009K17Rik	34.2031	40.0814	0.146658	27.359	31.461	0.130382	37.8237	18.7155	0.50519
2010010A06Rik	95.6133	41.99	0.560835	150.141	150.242	0.000673714	439.537	175.458	0.600812
2010010A06Rik	96.3906	41.99	0.564377	150.808	150.242	0.00375359	439.537	175.458	0.600812
2010011I20Rik	68.4062	26.7209	0.609379	90.7519	134.191	0.32371	178.684	119.311	0.332278
2010012O05Rik	62.9648	26.7209	0.575622	78.7406	86.0362	0.0847961	61.3004	74.8621	0.181155
2010015L04Rik	17.8789	22.9036	0.219386	26.6917	14.7674	0.446743	7.82558	14.0366	0.442489
2010015L04Rik	17.8789	22.9036	0.219386	26.6917	14.7674	0.446743	7.82558	14.0366	0.442489
2010016I18Rik	75.4023	24.8123	0.670935	66.7293	78.9735	0.155041	89.9942	128.669	0.300577
2010106C02Rik	45.0859	36.2641	0.195667	72.0677	109.792	0.3436	76.9516	91.2381	0.156585
2010106E10Rik	20.9883	15.2691	0.272494	77.406	93.7409	0.174255	62.6047	16.3761	0.738421
2010106G01Rik	184.23	55.3505	0.699559	231.551	290.212	0.202131	313.023	224.586	0.282526
2010107E04Rik	225.43	68.7109	0.6952	285.602	267.739	0.0625424	332.587	180.137	0.458377
2010107G12Rik	21.7656	17.1777	0.210786	13.3459	21.188	0.370122	20.8682	30.4127	0.313832
2010107G23Rik	77.7344	57.2591	0.2634	116.776	132.907	0.121365	122.601	140.366	0.126566
2010107H07Rik	115.047	40.0814	0.651608	152.143	176.567	0.138326	170.859	121.651	0.288003
2010109A12Rik	457.855	114.518	0.749881	641.936	633.072	0.0138086	858.206	535.732	0.375754
2010109I03Rik	28.7617	26.7209	0.0709554	29.3609	72.5529	0.595317	49.562	49.1282	0.00875272
2010109K11Rik	303.164	93.5232	0.69151	367.011	270.308	0.26349	590.832	276.054	0.532771
2010110P09Rik	70.7383	66.8023	0.0556415	129.455	147.032	0.119546	259.549	81.8804	0.684528
2010111I01Rik	15.5469	22.9036	0.321205	23.3553	14.7674	0.367706	24.781	16.3761	0.339168
2010204K13Rik	14.7695	7.63455	0.483088	7.34023	13.4833	0.455605	9.12985	14.0366	0.34957
2010204K13Rik	14.7695	5.72591	0.612316	24.6899	28.2507	0.126044	9.12985	11.6972	0.219484
2010300C02Rik	81.6211	43.8986	0.462165	99.4267	147.674	0.326715	155.207	212.889	0.270947
2010305A19Rik	154.691	76.3455	0.506466	202.857	215.09	0.0568746	149.99	79.541	0.469693
2010308F09Rik	10.1055	11.4518	0.117567	11.344	23.1142	0.50922	40.4322	32.7522	0.189948
2010308F09Rik	17.8789	13.3605	0.252725	16.6823	26.9666	0.381369	56.0834	11.6972	0.791432
2010310C07Rik	44.3086	20.995	0.526164	118.111	86.0362	0.271565	58.6919	53.8071	0.0832274
2010315B03Rik	154.691	34.3555	0.77791	188.844	202.249	0.0662803	148.686	138.027	0.0716891
2010317E24Rik	68.4062	34.3555	0.497773	66.7293	118.781	0.438217	96.5155	93.5776	0.0304402
2010320M18Rik	276.734	93.5232	0.662047	367.011	375.606	0.022881	320.849	383.668	0.163733
2010321M09Rik	142.254	38.1727	0.731658	200.188	217.659	0.0802661	161.729	154.403	0.0452964
2010321M09Rik	135.258	36.2641	0.731889	217.538	232.426	0.0640564	181.293	173.119	0.0450883
2200002D01Rik	761.797	124.061	0.837146	1016.29	834.037	0.17933	1083.84	706.511	0.348143
2200002J24Rik	25.6523	20.995	0.181556	17.3496	43.6601	0.602621	19.564	21.055	0.0708145
2200002K05Rik	132.926	57.2591	0.56924	132.124	151.526	0.128045	130.426	140.366	0.0708145
2210009G21Rik	293.059	55.3505	0.811128	418.393	506.586	0.174093	15.6512	14.0366	0.103157
2210009G21Rik	241.754	41.99	0.826311	323.637	343.503	0.0578314	286.938	159.082	0.445588
2210009G21Rik	16.3242	1.90864	0.883079	20.0188	9.63091	0.518907	366.498	163.761	0.553174
2210010C04Rik	14.7695	19.0864	0.226174	9.34211	6.42061	0.312724	32.6066	21.055	0.354273
2210010C17Rik	172.57	61.0764	0.646078	258.243	333.23	0.225031	654.741	407.063	0.378284
2210012G02Rik	279.844	93.5232	0.665802	390.367	503.376	0.224502	525.618	449.172	0.14544
2210013O21Rik	45.8633	26.7209	0.417379	76.0715	79.6155	0.0445151	31.3023	28.0733	0.103157
2210015D19Rik	143.809	57.2591	0.601838	224.211	248.478	0.0976626	298.676	177.797	0.404716
2210016F16Rik	237.867	85.8886	0.638922	284.934	331.303	0.13996	370.411	245.641	0.336842
2210016L21Rik	70.7383	32.4468	0.541312	118.778	167.578	0.291206	140.861	98.2565	0.302456
2210018M11Rik	178.012	43.8986	0.753395	250.235	335.156	0.253377	238.68	191.834	0.196272
2210019I11Rik	22.543	24.8123	0.0914593	13.3459	14.1253	0.0551824	15.6512	14.0366	0.103157
2210020M01Rik	34.9805	17.1777	0.508934	41.3722	54.5752	0.241923	40.4322	51.4677	0.214416
2210021J22Rik	135.258	41.99	0.689556	182.171	215.732	0.155569	169.554	109.954	0.351514
2210039B01Rik	62.1875	22.9036	0.6317	72.735	109.792	0.337523	97.8198	46.7888	0.521684
2210403K04Rik	317.156	53.4418	0.831497	425.733	518.143	0.178348	716.041	362.613	0.493586
2210404J11Rik	19.4336	20.995	0.0743707	252.237	285.717	0.117179	32.6066	30.4127	0.0672835
2210404J11Rik	156.246	51.5332	0.670179	19.3515	20.5459	0.058135	134.339	126.33	0.0596212
2210404O07Rik	258.855	76.3455	0.705065	294.276	286.359	0.0269042	496.925	273.714	0.449183
2210404O09Rik	75.4023	24.8123	0.670935	103.43	136.759	0.243702	75.6473	46.7888	0.381488
2210407C18Rik	31.8711	28.6295	0.101708	25.3572	23.1142	0.0884547	43.0407	67.8438	0.365591
2210408F21Rik	29.5391	24.8123	0.160018	19.3515	28.2507	0.315007	15.6512	35.0916	0.553991
2210408I21Rik	124.375	49.6245	0.601009	218.872	269.666	0.188357	242.593	184.816	0.238166
2210408I21Rik	124.375	49.6245	0.601009	218.872	269.666	0.188357	242.593	184.816	0.238166
2210409D07Rik	17.1016	22.9036	0.253326	16.015	10.915	0.318451	31.3023	11.6972	0.626316
2210409E12Rik	21.7656	13.3605	0.386167	16.015	16.6936	0.0406468	9.12985	11.6972	0.219484
2210411K11Rik	205.996	68.7109	0.666445	274.925	249.12	0.093863	357.368	226.926	0.365009
2210414B05Rik	17.1016	13.3605	0.218758	15.3477	10.273	0.330653	10.4341	16.3761	0.362844
2210415F13Rik	112.715	41.99	0.627467	79.4079	107.224	0.259421	258.244	212.889	0.175629
2210416O15Rik	13.2148	30.5382	0.567268	16.015	19.9039	0.195381	13.0426	9.35776	0.282526
2210417A02Rik	43.5312	38.1727	0.123096	57.3872	78.9735	0.273335	53.4748	72.5226	0.262646
2210417K05Rik	51.3047	28.6295	0.44197	67.3966	75.7632	0.11043	49.562	44.4494	0.103157
2210420H20Rik	16.3242	17.1777	0.0496873	17.3496	11.5571	0.333871	6.52132	23.3944	0.721244
2300002M23Rik	13.9922	17.1777	0.185446	22.0207	16.0515	0.271071	9.12985	18.7155	0.512178
2300003K06Rik	18.6562	30.5382	0.389085	11.344	9.63091	0.151012	6.52132	0	1
2300005B03Rik	20.2109	22.9036	0.117567	16.6823	10.273	0.384201	40.4322	4.67888	0.884278
2300009A05Rik	185.008	76.3455	0.587339	208.863	220.227	0.0516015	258.244	240.962	0.0669212
2310001A20Rik	82.3984	43.8986	0.467239	136.128	163.083	0.165287	84.7772	42.1099	0.503287
2310001H17Rik	122.82	28.6295	0.766899	190.179	190.692	0.00269256	223.029	173.119	0.223785
2310001H17Rik	247.195	47.7159	0.806971	298.28	283.149	0.0507286	426.494	240.962	0.435016
2310001H18Rik	17.1016	13.3605	0.218758	12.0113	5.77855	0.518907	10.4341	0	1
2310001K24Rik	73.0703	53.4418	0.268624	107.434	165.01	0.348921	135.643	91.2381	0.327368
2310002D06Rik	22.543	17.1777	0.238	18.6842	11.5571	0.381451	35.2151	7.01832	0.800702
2310002J15Rik	36.5351	19.0864	0.477589	56.0526	53.9331	0.0378133	66.5175	58.486	0.120742
2310002L09Rik	17.1016	19.0864	0.103991	12.6786	3.2103	0.746793	18.2597	0	1
2310002L09Rik	17.1016	19.0864	0.103991	12.6786	3.2103	0.746793	18.2597	0	1
2310002L13Rik	17.8789	20.995	0.148421	16.015	5.77855	0.63918	11.7384	9.35776	0.202806
2310003C23Rik	33.4258	24.8123	0.25769	57.3872	69.3426	0.17241	37.8237	46.7888	0.191609
2310003F16Rik	96.3906	43.8986	0.544575	162.152	190.05	0.146791	110.862	116.972	0.0522308
2310003H01Rik	92.5039	45.8073	0.504807	107.434	125.844	0.14629	189.118	112.293	0.406228
2310003L22Rik	141.477	53.4418	0.622257	258.243	321.03	0.195582	186.51	154.403	0.172145
2310004I24Rik	263.519	61.0764	0.768228	343.656	350.565	0.0197085	493.012	416.42	0.155354
2310004N24Rik	442.308	104.975	0.762666	609.239	611.242	0.003277	812.557	498.301	0.38675
2310005A03Rik	85.5078	30.5382	0.642861	112.105	163.726	0.315285	153.903	95.917	0.37677
2310005E17Rik	14.7695	22.9036	0.355145	14.6805	13.4833	0.0815491	1.30426	0	1
2310005G13Rik	17.8789	9.54318	0.466232	16.6823	19.2618	0.133917	2.60853	2.33944	0.103157
2310007B03Rik	52.082	40.0814	0.230418	82.7444	100.804	0.179152	48.2578	51.4677	0.0623673
2310007B03Rik	52.082	38.1727	0.267065	81.4098	96.3091	0.154703	48.2578	51.4677	0.0623673
2310007L24Rik	22.543	19.0864	0.153334	18.6842	21.8301	0.144106	24.781	28.0733	0.117274
2310008H04Rik	76.1797	26.7209	0.649238	111.438	111.077	0.00324372	113.471	98.2565	0.134083
2310008H09Rik	71.5156	36.2641	0.492921	154.145	155.379	0.00794154	140.861	107.614	0.236023
2310008H09Rik	94.0586	38.1727	0.59416	116.109	110.434	0.0488729	169.554	121.651	0.282526
2310008N11Rik	12.4375	20.995	0.407597	18.6842	7.70473	0.587634	7.82558	14.0366	0.442489
2310009A05Rik	133.703	43.8986	0.671671	216.87	258.108	0.15977	100.428	126.33	0.20503
2310009B15Rik	51.3047	26.7209	0.479172	62.0583	55.8593	0.0998899	76.9516	70.1832	0.0879565
2310010J17Rik	501.387	101.158	0.798244	869.483	877.055	0.00863321	1126.88	877.29	0.221491
2310010J17Rik	562.797	108.792	0.806693	762.716	752.495	0.0134009	1250.79	921.739	0.263074
2310010M20Rik	19.4336	20.995	0.0743707	20.0188	19.9039	0.00574041	16.9554	9.35776	0.448097
2310011J03Rik	135.258	55.3505	0.590778	192.848	209.954	0.0814755	213.899	161.421	0.24534
2310014F07Rik	19.4336	20.995	0.0743707	15.3477	12.1992	0.20515	10.4341	16.3761	0.362844
2310014L17Rik	20.9883	11.4518	0.454371	24.6899	28.8927	0.145465	24.781	25.7338	0.0370259
2310015A10Rik	122.043	43.8986	0.640302	177.5	231.142	0.232073	271.287	187.155	0.310121
2310015B20Rik	19.4336	19.0864	0.0178671	26.0244	25.0404	0.0378133	14.3469	9.35776	0.347751
2310015D24Rik	17.1016	19.0864	0.103991	14.6805	14.1253	0.0378133	5.21706	23.3944	0.776995
2310016D03Rik	10.8828	19.0864	0.429812	17.3496	5.13649	0.703943	20.8682	9.35776	0.551579
2310016M24Rik	198.223	72.5282	0.634107	255.573	299.2	0.145812	472.144	269.036	0.430183
2310020H05Rik	10.8828	13.3605	0.185446	16.015	8.98885	0.438724	15.6512	21.055	0.256652
2310021P13Rik	164.019	53.4418	0.674174	223.543	270.95	0.174964	350.847	280.733	0.199843
2310022A10Rik	21.7656	22.9036	0.0496873	150.141	186.198	0.193647	7.82558	39.7705	0.803231
2310022A10Rik	122.82	53.4418	0.564878	18.0169	21.8301	0.174674	151.295	145.045	0.041306
2310022B05Rik	63.7422	34.3555	0.461025	101.429	124.56	0.185704	113.471	105.275	0.0722316
2310028H24Rik	43.5312	38.1727	0.123096	48.0451	58.4275	0.177697	84.7772	42.1099	0.503287
2310030A07Rik	15.5469	15.2691	0.0178671	12.0113	7.06267	0.411997	10.4341	0	1
2310030G06Rik	135.258	30.5382	0.774222	190.846	248.478	0.231939	187.814	168.44	0.103157
2310030N02Rik	53.6367	47.7159	0.110387	60.7237	87.9623	0.309662	116.08	116.972	0.00762985
2310033E01Rik	105.719	43.8986	0.58476	110.771	134.833	0.178459	131.731	46.7888	0.644815
2310033P09Rik	174.902	53.4418	0.694448	236.222	222.795	0.0568396	259.549	205.871	0.206812
2310034C09Rik	13.9922	17.1777	0.185446	18.0169	11.5571	0.358542	7.82558	11.6972	0.330986
2310034G01Rik	115.824	47.7159	0.588032	146.805	138.043	0.0596812	181.293	116.972	0.354789
2310034O05Rik	19.4336	17.1777	0.11608	7.34023	14.7674	0.502944	16.9554	18.7155	0.0940441
2310035C23Rik	189.672	76.3455	0.597487	316.297	360.838	0.123438	350.847	212.889	0.393214
2310035K24Rik	265.851	51.5332	0.806158	385.028	469.989	0.180771	397.801	287.751	0.276645
2310036O22Rik	316.379	101.158	0.680264	526.495	515.575	0.0207403	530.836	341.558	0.356565
2310037I24Rik	144.586	45.8073	0.683183	198.853	196.471	0.0119828	225.638	168.44	0.253495
2310039H08Rik	87.0625	49.6245	0.430012	118.111	149.6	0.210489	133.035	138.027	0.0361669
2310039L15Rik	9.32812	15.2691	0.389085	20.0188	11.5571	0.422688	3.91279	39.7705	0.901616
2310040G24Rik	46.6406	26.7209	0.427089	54.7181	80.2576	0.31822	41.7365	67.8438	0.384815
2310042D19Rik	19.4336	22.9036	0.151507	15.3477	18.6198	0.175728	24.781	49.1282	0.495585
2310042E22Rik	20.9883	15.2691	0.272494	22.0207	13.4833	0.387699	15.6512	4.67888	0.701052
2310043J07Rik	20.9883	36.2641	0.421238	14.0132	16.6936	0.160566	23.4768	14.0366	0.402105
2310043L19Rik	20.9883	24.8123	0.154117	24.0226	30.1769	0.203941	52.1706	23.3944	0.551579
2310043O21Rik	13.2148	17.1777	0.230699	20.6861	23.7563	0.129236	14.3469	37.431	0.616711
2310044G17Rik	233.98	51.5332	0.779754	350.996	309.473	0.1183	234.768	112.293	0.521684
2310044G17Rik	318.711	62.985	0.802376	479.784	391.657	0.18368	378.237	177.797	0.529931
2310044H10Rik	86.2851	59.1677	0.314277	143.468	162.441	0.116801	100.428	159.082	0.3687
2310045N01Rik	140.699	40.0814	0.715127	230.216	325.525	0.292784	275.2	152.064	0.447443
2310046A06Rik	13.9922	11.4518	0.181556	15.3477	10.915	0.288819	7.82558	2.33944	0.701052
2310046O06Rik	122.82	34.3555	0.720279	153.477	165.652	0.0734928	125.209	93.5776	0.252631
2310047B19Rik	102.609	28.6295	0.720985	117.444	121.35	0.0321869	125.209	133.348	0.0610336
2310047M10Rik	316.379	104.975	0.668198	452.425	564.372	0.198356	476.056	423.439	0.110529
2310050B05Rik	37.3125	34.3555	0.0792504	49.3797	57.7855	0.145465	116.08	70.1832	0.395387
2310050C09Rik	12.4375	11.4518	0.0792504	15.3477	7.06267	0.539824	2.60853	7.01832	0.628326
2310057J18Rik	13.2148	5.72591	0.566706	15.3477	2.56824	0.832663	2.60853	11.6972	0.776995
2310057M21Rik	164.019	62.985	0.615991	266.917	333.23	0.198999	286.938	236.283	0.176535
2310057N15Rik	14.7695	22.9036	0.355145	12.6786	4.49443	0.64551	11.7384	25.7338	0.543854
2310061C15Rik	186.562	45.8073	0.754467	305.62	359.554	0.150002	176.076	145.045	0.176233
2310061I04Rik	209.883	83.98	0.599872	228.882	269.666	0.151239	502.142	407.063	0.189347
2310061J03Rik	286.84	66.8023	0.767109	400.376	455.221	0.12048	388.671	262.017	0.325863
2310061N02Rik	20.2109	13.3605	0.338949	18.6842	17.9777	0.0378133	29.9981	14.0366	0.532082
2310065F04Rik	18.6562	19.0864	0.0225355	20.0188	12.8412	0.358542	20.8682	30.4127	0.313832
2310067B10Rik	314.824	80.1627	0.745373	453.76	498.239	0.0892738	515.184	353.255	0.314313
2310068J16Rik	289.949	68.7109	0.763024	377.688	448.158	0.157244	537.357	350.916	0.346959
2310069B03Rik	29.5391	28.6295	0.0307899	20.0188	31.461	0.363694	22.1725	9.35776	0.577956
2310069G16Rik	17.8789	20.995	0.148421	12.6786	15.4095	0.177221	10.4341	18.7155	0.442489
2310079F23Rik	188.117	41.99	0.776788	240.226	309.473	0.22376	199.552	112.293	0.437275
2310079G19Rik	11.6602	17.1777	0.321205	16.6823	13.4833	0.191763	16.9554	4.67888	0.724048
2310081J21Rik	15.5469	9.54318	0.386167	8.67481	10.273	0.155569	11.7384	14.0366	0.163733
2310081J21Rik	16.3242	9.54318	0.415397	16.015	4.49443	0.719362	15.6512	7.01832	0.551579
2400001E08Rik	209.105	80.1627	0.61664	377.021	456.505	0.174115	453.884	306.467	0.324791
2400003C14Rik	366.906	74.4368	0.797123	429.737	449.443	0.0438446	483.882	341.558	0.294129
2400009B08Rik	35.7578	22.9036	0.359479	48.0451	73.837	0.349308	27.3895	51.4677	0.46783
2410001C21Rik	135.258	15.2691	0.887111	202.857	236.92	0.143775	139.556	107.614	0.228883
2410002F23Rik	267.406	66.8023	0.750184	391.701	446.874	0.123464	422.582	266.696	0.368888
2410002I01Rik	321.043	82.0714	0.74436	433.741	484.756	0.105239	473.448	355.595	0.248925
2410002O22Rik	129.039	55.3505	0.571056	216.203	282.507	0.234698	178.684	152.064	0.148981
2410002O22Rik	129.039	55.3505	0.571056	216.203	282.507	0.234698	178.684	152.064	0.148981
2410003K15Rik	173.348	70.6196	0.592613	244.897	260.677	0.0605348	378.237	257.338	0.319637
2410003L11Rik	23.3203	19.0864	0.181556	8.00752	8.34679	0.0406468	24.781	18.7155	0.244764
2410004A20Rik	18.6562	26.7209	0.301811	15.3477	16.6936	0.0806198	39.1279	9.35776	0.760842
2410004B18Rik	135.258	45.8073	0.661333	205.526	217.659	0.0557398	378.237	313.485	0.171194
2410004I01Rik	20.9883	22.9036	0.083627	9.34211	14.1253	0.338628	14.3469	11.6972	0.184688
2410004N09Rik	182.676	78.2541	0.571623	266.25	258.751	0.0281673	284.33	140.366	0.506325
2410004P03Rik	29.5391	24.8123	0.160018	30.0282	21.8301	0.273014	31.3023	23.3944	0.252631
2410006H16Rik	164.019	53.4418	0.674174	272.256	276.086	0.0138741	183.901	170.779	0.0713543
2410007B07Rik	17.8789	9.54318	0.466232	16.015	7.06267	0.558998	20.8682	30.4127	0.313832
2410012E07Rik	14.7695	19.0864	0.226174	16.6823	10.915	0.345713	29.9981	16.3761	0.454096
2410012M07Rik	12.4375	19.0864	0.348357	15.3477	12.1992	0.20515	3.91279	30.4127	0.871344
2410015M20Rik	145.363	53.4418	0.632357	162.152	256.824	0.368626	172.163	175.458	0.0187801
2410016O06Rik	132.148	49.6245	0.624479	143.468	201.607	0.288378	333.892	257.338	0.229276
2410017I17Rik	46.6406	38.1727	0.181556	96.7575	137.401	0.295802	117.384	58.486	0.501754
2410017P09Rik	240.976	49.6245	0.794069	314.295	344.145	0.0867351	251.723	123.99	0.507434
2410018L13Rik	24.0976	20.995	0.128753	18.6842	15.4095	0.175269	35.2151	32.7522	0.0699408
2410018M08Rik	27.207	26.7209	0.0178671	25.3572	32.103	0.210133	48.2578	25.7338	0.466742
2410021H03Rik	18.6562	20.995	0.111396	20.6861	16.0515	0.224043	2.60853	14.0366	0.814163
2410022L05Rik	73.8476	30.5382	0.58647	108.769	117.497	0.0742853	195.64	88.8987	0.5456
2410042D21Rik	115.047	57.2591	0.502298	170.16	191.976	0.113641	224.333	163.761	0.270012
2410057H14Rik	22.543	28.6295	0.212598	21.3534	25.0404	0.147242	20.8682	42.1099	0.504434
2410066E13Rik	41.1992	22.9036	0.444076	48.0451	78.3314	0.386643	79.5601	77.2015	0.0296455
2410075B13Rik	63.7422	28.6295	0.550854	66.7293	67.4164	0.0101911	74.3431	35.0916	0.527977
2410076I21Rik	17.1016	22.9036	0.253326	12.6786	10.273	0.189738	14.3469	21.055	0.318597
2410088K16Rik	17.8789	17.1777	0.0392179	13.3459	5.77855	0.567016	0	9.35776	1
2410089E03Rik	62.1875	22.9036	0.6317	78.7406	116.855	0.326169	93.907	116.972	0.197184
2410091C18Rik	141.477	38.1727	0.730183	198.186	233.068	0.149664	155.207	79.541	0.487518
2410114N07Rik	14.7695	19.0864	0.226174	16.6823	14.1253	0.153276	5.21706	37.431	0.860622
2410124H12Rik	13.2148	15.2691	0.134537	17.3496	21.188	0.181158	28.6938	16.3761	0.429282
2410127L17Rik	87.0625	61.0764	0.298477	98.0921	96.3091	0.0181768	156.512	63.1649	0.596421
2410131K14Rik	110.383	59.1677	0.463977	132.124	173.356	0.237847	125.209	159.082	0.212925
2410137F16Rik	13.9922	19.0864	0.266902	7.34023	4.49443	0.387699	19.564	7.01832	0.641263
2410137M14Rik	26.4297	19.0864	0.277843	18.0169	22.4721	0.198255	16.9554	18.7155	0.0940441
2410141K09Rik	13.9922	15.2691	0.083627	11.344	3.85237	0.660405	3.91279	25.7338	0.847951
2500003M10Rik	271.293	89.7059	0.669339	365.677	351.849	0.0378133	305.198	320.503	0.0477544
2500004C02Rik	289.172	59.1677	0.795389	302.951	362.122	0.163401	731.692	505.319	0.309383
2510002D24Rik	113.492	32.4468	0.714105	165.489	190.692	0.132168	195.64	168.44	0.139031
2510003D18Rik	13.9922	24.8123	0.436078	16.015	5.77855	0.63918	11.7384	14.0366	0.163733
2510003E04Rik	63.7422	51.5332	0.191537	76.0715	91.1726	0.165633	119.992	109.954	0.0836606
2510006D16Rik	196.668	70.6196	0.64092	302.951	389.731	0.222666	275.2	196.513	0.285926
2510009E07Rik	66.8515	30.5382	0.543194	75.4042	101.446	0.256704	41.7365	42.1099	0.00886877
2510012J08Rik	223.875	66.8023	0.701609	320.301	403.856	0.206894	361.281	283.072	0.216477
2510039O18Rik	185.785	82.0714	0.558246	209.53	199.681	0.0470062	425.19	313.485	0.262718
2510049J12Rik	137.59	55.3505	0.597714	209.53	202.249	0.034749	126.514	72.5226	0.42676
2600006L11Rik	21.7656	26.7209	0.185446	18.0169	26.9666	0.331879	35.2151	11.6972	0.667836
2610001J05Rik	104.164	24.8123	0.761796	196.852	243.983	0.193176	66.5175	100.596	0.338766
2610002D18Rik	51.3047	36.2641	0.293162	51.3816	81.5417	0.369874	43.0407	56.1466	0.233422
2610002I17Rik	80.8437	38.1727	0.527821	110.103	150.242	0.267161	87.3857	67.8438	0.223629
2610002J02Rik	107.273	41.99	0.60857	178.167	199.039	0.104862	223.029	140.366	0.370637
2610002M06Rik	62.1875	11.4518	0.81585	77.406	98.8774	0.217151	78.2558	35.0916	0.551579
2610005L07Rik	326.484	118.335	0.637546	407.049	426.97	0.0466578	721.258	626.97	0.130727
2610008E11Rik	98.7226	40.0814	0.594	134.793	148.316	0.0911755	76.9516	60.8254	0.209562
2610015P09Rik	167.129	36.2641	0.783017	253.572	243.983	0.0378133	136.948	152.064	0.0994048
2610016A17Rik	20.2109	20.995	0.0373456	24.0226	16.6936	0.305087	5.21706	39.7705	0.868821
2610017I09Rik	17.1016	20.995	0.185446	10.6767	8.34679	0.218223	6.52132	28.0733	0.767704
2610018G03Rik	16.3242	13.3605	0.181556	18.6842	28.8927	0.353325	15.6512	42.1099	0.628326
2610019E17Rik	204.441	53.4418	0.738596	308.29	360.838	0.145629	255.636	187.155	0.267883
2610019F03Rik	20.9883	15.2691	0.272494	26.0244	33.3872	0.220525	28.6938	25.7338	0.103157
2610020C07Rik	152.359	30.5382	0.799565	266.25	244.625	0.0812202	233.463	238.623	0.0216223
2610020H08Rik	119.711	28.6295	0.760844	214.868	243.983	0.119331	165.642	184.816	0.103748
2610020H08Rik	120.488	28.6295	0.762387	218.205	245.909	0.112661	166.946	184.816	0.0966905
2610021K21Rik	108.828	45.8073	0.579086	116.776	168.22	0.305812	134.339	105.275	0.216351
2610027L16Rik	101.055	43.8986	0.565595	218.205	273.518	0.202228	289.547	175.458	0.394025
2610028E06Rik	12.4375	28.6295	0.565571	9.34211	5.13649	0.450179	37.8237	35.0916	0.0722316
2610028H24Rik	16.3242	15.2691	0.0646354	12.6786	19.2618	0.341777	10.4341	25.7338	0.594537
2610029G23Rik	30.3164	20.995	0.30747	59.3891	80.8997	0.265892	45.6492	53.8071	0.151613
2610029I01Rik	74.625	28.6295	0.616354	99.4267	131.622	0.244607	100.428	77.2015	0.231278
2610034B18Rik	333.48	64.8936	0.805405	379.69	408.351	0.0701866	247.81	210.55	0.150359
2610034M16Rik	13.9922	11.4518	0.181556	16.6823	7.06267	0.576638	23.4768	4.67888	0.800702
2610035D17Rik	82.3984	38.1727	0.53673	100.761	121.992	0.174031	99.1241	60.8254	0.386371
2610035F20Rik	16.3242	13.3605	0.181556	18.6842	21.188	0.11817	45.6492	46.7888	0.0243552
2610037D02Rik	16.3242	19.0864	0.144719	16.015	21.188	0.244146	2.60853	21.055	0.876109
2610039C10Rik	116.602	45.8073	0.607147	152.143	204.175	0.254842	135.643	140.366	0.033647
2610044O15Rik	101.055	30.5382	0.697805	154.812	223.437	0.307134	109.558	93.5776	0.145864
2610100L16Rik	14.7695	13.3605	0.095404	11.344	8.34679	0.26421	0	2.33944	1
2610101N10Rik	237.867	57.2591	0.759281	304.953	337.724	0.0970346	383.454	269.036	0.298388
2610109H07Rik	17.8789	11.4518	0.359479	20.6861	15.4095	0.255081	19.564	28.0733	0.303111
2610203C20Rik	14.7695	7.63455	0.483088	12.0113	14.1253	0.149664	15.6512	4.67888	0.701052
2610203C22Rik	16.3242	20.995	0.222471	20.6861	13.4833	0.348196	16.9554	11.6972	0.310121
2610204G22Rik	163.242	53.4418	0.672622	265.583	306.263	0.132828	263.461	238.623	0.0942776
2610204G22Rik	163.242	53.4418	0.672622	265.583	306.263	0.132828	263.461	238.623	0.0942776
2610206C17Rik	258.855	72.5282	0.719812	384.361	403.214	0.0467573	644.306	580.181	0.0995263
2610301B20Rik	102.609	24.8123	0.758187	118.778	146.39	0.188617	88.69	105.275	0.157538
2610301G19Rik	103.387	47.7159	0.538471	198.186	219.585	0.0974506	301.285	163.761	0.456459
2610305D13Rik	55.9687	51.5332	0.0792504	43.3741	17.3356	0.600322	41.7365	25.7338	0.383421
2610306M01Rik	320.266	61.0764	0.809295	501.805	593.264	0.154163	502.142	325.182	0.35241
2610307P16Rik	16.3242	22.9036	0.287265	16.6823	4.49443	0.730588	18.2597	9.35776	0.487518
2610316D01Rik	10.1055	5.72591	0.433385	14.0132	16.6936	0.160566	16.9554	11.6972	0.310121
2610318N02Rik	31.0937	22.9036	0.2634	54.7181	55.8593	0.0204305	9.12985	37.431	0.756089
2610507B11Rik	111.16	34.3555	0.690937	115.442	158.589	0.27207	178.684	159.082	0.109704
2610507I01Rik	123.598	24.8123	0.79925	168.158	223.437	0.247404	160.424	114.633	0.285442
2610524H06Rik	20.2109	11.4518	0.433385	24.0226	29.5348	0.186635	45.6492	32.7522	0.282526
2610528A11Rik	28.7617	30.5382	0.0581722	23.3553	36.5975	0.361834	7.82558	18.7155	0.581867
2610528E23Rik	99.5	22.9036	0.769813	180.837	190.692	0.0516831	88.69	86.5593	0.024024
2610528J11Rik	122.82	55.3505	0.549338	171.494	226.647	0.243343	224.333	175.458	0.21787
2700007P21Rik	16.3242	26.7209	0.389085	160.818	162.441	0.00999549	87.3857	114.633	0.237689
2700007P21Rik	92.5039	24.8123	0.73177	22.688	11.5571	0.490607	5.21706	28.0733	0.814163
2700023E23Rik	173.348	59.1677	0.658676	224.211	239.489	0.0637947	232.159	262.017	0.113955
2700029M09Rik	54.414	38.1727	0.298477	72.735	62.922	0.134915	99.1241	84.2198	0.150359
2700038G22Rik	121.266	36.2641	0.700953	128.788	154.737	0.167698	140.861	95.917	0.319064
2700046A07Rik	17.8789	15.2691	0.145971	20.0188	10.273	0.486834	1.30426	11.6972	0.888498
2700046G09Rik	279.066	80.1627	0.712747	315.63	361.48	0.126841	627.351	414.081	0.339954
2700049A03Rik	153.914	41.99	0.727185	236.889	256.182	0.0753101	219.116	271.375	0.19257
2700050L05Rik	170.238	53.4418	0.686076	254.906	274.16	0.0702287	301.285	191.834	0.36328
2700054A10Rik	119.711	49.6245	0.585463	162.82	247.193	0.341327	80.8644	91.2381	0.1137
2700060E02Rik	136.812	43.8986	0.679133	184.173	246.551	0.253004	213.899	266.696	0.197966
2700062C07Rik	66.0742	15.2691	0.76891	92.0865	112.361	0.180438	74.3431	107.614	0.309171
2700069I18Rik	15.5469	17.1777	0.0949403	8.00752	5.13649	0.358542	9.12985	4.67888	0.487518
2700070H01Rik	17.8789	22.9036	0.219386	12.6786	13.4833	0.0596816	27.3895	4.67888	0.829173
2700078E11Rik	248.75	62.985	0.746794	343.656	410.919	0.163689	386.062	320.503	0.169814
2700081L22Rik	164.019	40.0814	0.75563	254.906	349.281	0.270198	203.465	126.33	0.379109
2700081O15Rik	66.8515	13.3605	0.800147	67.3966	87.9623	0.233801	174.771	121.651	0.303943
2700086A05Rik	27.9844	26.7209	0.0451486	30.0282	28.2507	0.0591952	73.0388	42.1099	0.423458
2700089E24Rik	173.348	53.4418	0.691707	278.261	245.909	0.116265	249.114	262.017	0.0492441
2700089I24Rik	18.6562	32.4468	0.425021	16.015	8.34679	0.478816	15.6512	23.3944	0.330986
2700090O03Rik	13.2148	13.3605	0.010899	13.3459	11.5571	0.134032	14.3469	18.7155	0.233422
2700094K13Rik	115.824	22.9036	0.802255	128.788	171.43	0.248746	93.907	70.1832	0.252631
2700097O09Rik	394.113	78.2541	0.801443	575.874	574.644	0.00213546	517.793	269.036	0.480419
2700099C18Rik	145.363	45.8073	0.684877	214.868	251.688	0.14629	108.254	119.311	0.0926777
2810001G20Rik	215.324	80.1627	0.627711	268.919	279.939	0.0393632	169.554	205.871	0.176404
2810002D19Rik	264.297	78.2541	0.703916	379.023	446.874	0.151836	639.089	423.439	0.337435
2810002N01Rik	198.223	62.985	0.682251	280.263	328.735	0.14745	485.186	245.641	0.493718
2810002N01Rik	198.223	62.985	0.682251	280.263	328.735	0.14745	485.186	245.641	0.493718
2810004N23Rik	200.555	57.2591	0.714496	357.669	365.333	0.0209764	315.632	233.944	0.258808
2810006K23Rik	101.055	49.6245	0.508934	130.79	141.895	0.0782685	118.688	95.917	0.191856
2810006K23Rik	101.055	49.6245	0.508934	130.79	141.895	0.0782685	118.688	95.917	0.191856
2810007J24Rik	17.1016	19.0864	0.103991	12.0113	6.42061	0.465452	22.1725	16.3761	0.261424
2810007J24Rik	6.21875	9.54318	0.348357	11.344	2.56824	0.773603	16.9554	0	1
2810008D09Rik	153.137	47.7159	0.68841	202.19	220.227	0.0819018	237.376	166.1	0.300266
2810008M24Rik	251.082	64.8936	0.741544	365.677	355.702	0.0272784	378.237	194.173	0.486635
2810011L19Rik	17.1016	22.9036	0.253326	12.6786	10.915	0.139096	15.6512	23.3944	0.330986
2810013P06Rik	770.347	192.772	0.749759	850.132	791.019	0.0695337	2017.7	1499.58	0.256786
2810021B07Rik	463.297	114.518	0.752819	645.273	719.108	0.102676	583.006	418.76	0.281723
2810021J22Rik	66.0742	30.5382	0.53782	95.423	123.276	0.225939	67.8217	67.8438	0.000324531
2810025M15Rik	83.9531	47.7159	0.431636	144.803	183.629	0.211441	207.378	163.761	0.210327
2810029C07Rik	208.328	89.7059	0.569401	288.938	358.912	0.194961	463.014	297.109	0.358315
2810030E01Rik	20.2109	22.9036	0.117567	26.6917	23.1142	0.134032	22.1725	7.01832	0.683467
2810032G03Rik	8.55078	13.3605	0.359993	22.688	16.6936	0.26421	24.781	28.0733	0.117274
2810046L04Rik	264.297	38.1727	0.855569	457.096	443.022	0.03079	320.849	276.054	0.139614
2810047C21Rik1	20.9883	13.3605	0.363432	6.67293	16.6936	0.600269	15.6512	9.35776	0.402105
2810049E08Rik	13.2148	15.2691	0.134537	14.0132	3.85237	0.72509	6.52132	2.33944	0.641263
2810055F11Rik	208.328	64.8936	0.688503	301.617	344.145	0.123576	234.768	173.119	0.262596
2810055G20Rik	23.3203	19.0864	0.181556	30.6955	46.2284	0.336003	23.4768	9.35776	0.601403
2810403A07Rik	265.851	64.8936	0.755903	328.976	346.713	0.0511582	486.491	294.769	0.39409
2810403D21Rik	200.555	40.0814	0.800147	222.209	301.769	0.263645	289.547	198.852	0.313229
2810404M03Rik	20.2109	19.0864	0.0556415	17.3496	12.8412	0.259856	1.30426	18.7155	0.930311
2810405F15Rik	24.0976	17.1777	0.287162	16.015	23.7563	0.32586	56.0834	21.055	0.624577
2810405K02Rik	97.1679	49.6245	0.489291	123.449	121.35	0.0170093	130.426	100.596	0.228715
2810407C02Rik	268.184	83.98	0.686856	334.314	333.872	0.00132318	652.132	430.457	0.339924
2810408A11Rik	276.734	89.7059	0.675841	414.389	510.438	0.18817	526.923	308.806	0.413944
2810408I11Rik	154.691	70.6196	0.543481	245.564	309.473	0.20651	393.888	329.861	0.162551
2810408M09Rik	108.051	57.2591	0.470072	133.459	190.692	0.300135	166.946	102.935	0.383421
2810410L24Rik	179.566	78.2541	0.564205	220.207	265.813	0.171573	296.068	283.072	0.0438945
2810417H13Rik	55.9687	28.6295	0.488472	54.0508	69.9846	0.227677	50.8663	63.1649	0.194706
2810422J05Rik	135.258	38.1727	0.717778	217.538	256.182	0.150848	259.549	161.421	0.378069
2810422O20Rik	139.144	47.7159	0.657077	202.19	239.489	0.155743	187.814	126.33	0.327368
2810428I15Rik	73.0703	45.8073	0.373107	93.4211	104.656	0.10735	87.3857	177.797	0.50851
2810429I04Rik	25.6523	15.2691	0.404768	28.0263	21.8301	0.221087	7.82558	30.4127	0.742687
2810432D09Rik	142.254	57.2591	0.597487	206.861	229.858	0.100048	194.335	173.119	0.109176
2810432L12Rik	140.699	51.5332	0.633735	149.474	160.515	0.0687878	247.81	152.064	0.386371
2810433D01Rik	22.543	22.9036	0.0157476	18.0169	21.8301	0.174674	29.9981	18.7155	0.376109
2810442I21Rik	97.1679	40.0814	0.587504	125.451	132.907	0.0560953	130.426	81.8804	0.37221
2810442N19Rik	15.5469	32.4468	0.520851	30.0282	37.2395	0.193647	43.0407	11.6972	0.728229
2810453I06Rik	69.9609	40.0814	0.427089	108.102	143.822	0.248364	147.382	133.348	0.0952206
2810454H06Rik	199	57.2591	0.712266	310.291	301.769	0.0274672	203.465	142.706	0.298623
2810459M11Rik	83.9531	36.2641	0.568043	88.75	121.35	0.268641	117.384	219.907	0.466213
2810468N07Rik	15.5469	24.8123	0.37342	15.3477	24.3983	0.37095	33.9109	35.0916	0.033647
2810471M01Rik	6.21875	13.3605	0.534541	11.344	1.28412	0.886802	0	11.6972	1
2810474O19Rik	209.883	53.4418	0.745373	291.607	331.945	0.121521	474.752	425.778	0.103157
2900002K06Rik	130.594	28.6295	0.780774	220.874	224.079	0.0143035	125.209	63.1649	0.495526
2900005J15Rik	150.027	38.1727	0.745561	228.214	251.688	0.0932644	215.204	208.21	0.0324969
2900006K08Rik	125.152	55.3505	0.557735	178.835	199.681	0.104398	306.502	269.036	0.122239
2900008C10Rik	16.3242	15.2691	0.0646354	14.6805	38.5237	0.618924	13.0426	11.6972	0.103157
2900009J06Rik	298.5	76.3455	0.744236	501.137	507.228	0.0120078	431.711	273.714	0.365978
2900010M23Rik	42.7539	26.7209	0.375006	60.0564	99.5194	0.396536	65.2132	93.5776	0.303111
2900011O08Rik	19.4336	7.63455	0.607147	14.6805	14.7674	0.00588759	28.6938	11.6972	0.592344
2900026A02Rik	20.9883	19.0864	0.0906177	20.0188	22.4721	0.109172	56.0834	42.1099	0.249155
2900041M22Rik	14.7695	26.7209	0.447267	18.0169	10.915	0.394179	24.781	28.0733	0.117274
2900052N01Rik	16.3242	20.995	0.222471	11.344	9.63091	0.151012	18.2597	18.7155	0.0243552
2900053A13Rik	134.48	47.7159	0.645183	202.857	236.92	0.143775	79.5601	123.99	0.358336
2900055J20Rik	18.6562	9.54318	0.488472	13.3459	21.8301	0.388647	40.4322	0	1
2900056M20Rik	17.8789	11.4518	0.359479	35.3666	51.3649	0.311464	14.3469	28.0733	0.488948
2900057B20Rik	24.875	30.5382	0.185446	16.015	8.98885	0.438724	5.21706	0	1
2900060B14Rik	179.566	49.6245	0.723642	268.252	249.762	0.0689288	183.901	145.045	0.211287
2900064A13Rik	169.461	76.3455	0.54948	268.252	306.263	0.124113	221.725	152.064	0.314179
2900076A07Rik	108.051	51.5332	0.523065	178.167	197.113	0.0961143	129.122	105.275	0.184688
2900079G21Rik	17.8789	17.1777	0.0392179	8.00752	10.915	0.266377	10.4341	18.7155	0.442489
2900079G21Rik	8.55078	9.54318	0.103991	8.00752	10.915	0.266377	10.4341	18.7155	0.442489
2900079G21Rik	8.55078	9.54318	0.103991	8.00752	10.915	0.266377	10.4341	18.7155	0.442489
2900079G21Rik	8.55078	9.54318	0.103991	18.0169	10.915	0.394179	0	7.01832	1
2900092C05Rik	13.2148	11.4518	0.133412	10.0094	4.49443	0.55098	28.6938	7.01832	0.755407
2900092D14Rik	13.2148	20.995	0.370572	12.0113	7.06267	0.411997	13.0426	35.0916	0.628326
2900092E17Rik	62.1875	28.6295	0.539625	83.4117	100.161	0.167228	125.209	84.2198	0.327368
2900093L17Rik	20.2109	7.63455	0.622257	12.0113	10.915	0.0912681	15.6512	14.0366	0.103157
2900097C17Rik	166.352	78.2541	0.529586	208.196	208.028	0.000806119	410.843	198.852	0.51599
3000002C10Rik	79.289	34.3555	0.566706	102.096	125.202	0.18455	134.339	56.1466	0.582054
3010001F23Rik	6.99609	13.3605	0.476358	5.33835	6.42061	0.168561	15.6512	7.01832	0.551579
3010001F23Rik	6.99609	15.2691	0.541814	5.33835	3.85237	0.27836	11.7384	0	1
3010026O09Rik	78.5117	26.7209	0.659657	100.761	125.202	0.195209	62.6047	81.8804	0.235413
3100003L05Rik	10.8828	19.0864	0.429812	10.0094	4.49443	0.55098	13.0426	4.67888	0.641263
3110001D03Rik	106.496	43.8986	0.587791	188.844	181.703	0.0378133	112.167	194.173	0.422338
3110001I22Rik	184.23	74.4368	0.595958	363.675	331.303	0.0890122	350.847	233.944	0.333202
3110002H16Rik	98.7226	36.2641	0.632667	156.147	184.271	0.152627	125.209	152.064	0.176599
3110003A17Rik	195.113	43.8986	0.775009	202.19	216.375	0.0655558	243.897	91.2381	0.625916
3110007F17Rik	17.1016	5.72591	0.665182	13.3459	14.7674	0.0962614	3.91279	7.01832	0.442489
3110009E18Rik	262.742	99.2491	0.622257	338.985	409.635	0.17247	498.229	308.806	0.380192
3110009F21Rik	15.5469	24.8123	0.37342	19.3515	8.98885	0.535496	18.2597	11.6972	0.359398
3110015C05Rik	16.3242	22.9036	0.287265	14.6805	4.49443	0.69385	16.9554	9.35776	0.448097
3110021A11Rik	167.129	80.1627	0.520354	282.932	311.4	0.0914167	288.242	243.302	0.155913
3110021N24Rik	16.3242	22.9036	0.287265	20.0188	16.0515	0.198178	18.2597	23.3944	0.219484
3110035E14Rik	20.2109	22.9036	0.117567	10.6767	5.77855	0.45877	24.781	11.6972	0.527977
3110039I08Rik	10.8828	17.1777	0.366458	9.34211	8.34679	0.106541	0	11.6972	1
3110039M20Rik	9.32812	7.63455	0.181556	11.344	7.70473	0.320809	24.781	9.35776	0.622382
3110040N11Rik	89.3945	36.2641	0.594336	140.799	162.441	0.133233	118.688	116.972	0.0144585
3110043O21Rik	114.269	38.1727	0.665941	132.124	200.323	0.340445	206.074	156.742	0.239387
3110045C21Rik	144.586	45.8073	0.683183	164.154	241.415	0.320033	100.428	102.935	0.0243552
3110047P20Rik	11.6602	15.2691	0.236356	11.344	16.6936	0.320458	14.3469	35.0916	0.591158
3110052M02Rik	78.5117	38.1727	0.513796	104.098	135.475	0.231608	106.95	79.541	0.256277
3110056K07Rik	455.523	118.335	0.740221	522.491	527.774	0.0100105	704.303	465.549	0.338994
3110056K07Rik	455.523	118.335	0.740221	522.491	527.774	0.0100105	704.303	465.549	0.338994
3110056O03Rik	115.824	51.5332	0.555074	150.141	184.914	0.188047	204.769	166.1	0.188843
3110057O12Rik	185.785	57.2591	0.691799	340.987	396.152	0.139251	404.322	254.999	0.369317
3110062M04Rik	86.2851	47.7159	0.446997	113.44	148.316	0.235148	129.122	170.779	0.243923
3110070M22Rik	162.465	116.427	0.283372	158.816	261.961	0.393742	292.155	285.412	0.023082
3110079O15Rik	25.6523	28.6295	0.103991	22.0207	14.1253	0.358542	19.564	4.67888	0.760842
3110082D06Rik	15.5469	13.3605	0.140634	4.67105	7.70473	0.393742	2.60853	21.055	0.876109
3110082I17Rik	65.2969	36.2641	0.444627	78.7406	90.5306	0.130232	109.558	79.541	0.273984
3110082J24Rik	20.9883	24.8123	0.154117	22.0207	14.1253	0.358542	37.8237	30.4127	0.195934
3110099E03Rik	13.2148	15.2691	0.134537	20.0188	20.5459	0.0256569	50.8663	0	1
3200001D21Rik	17.1016	22.9036	0.253326	18.0169	12.1992	0.322906	18.2597	16.3761	0.103157
3200002M19Rik	157.023	51.5332	0.671812	169.493	195.187	0.131638	146.078	102.935	0.295338
3230401D17Rik	284.508	59.1677	0.792035	388.365	440.454	0.118262	479.969	322.843	0.327368
3300002I08Rik	73.8476	34.3555	0.534779	104.098	149.6	0.30416	63.9089	42.1099	0.341095
3300005D01Rik	33.4258	26.7209	0.20059	43.3741	65.4902	0.337701	75.6473	46.7888	0.381488
3300005D01Rik	52.082	20.995	0.596886	43.3741	65.4902	0.337701	95.2113	56.1466	0.410295
3300005D01Rik	52.082	20.995	0.596886	30.0282	34.0292	0.117576	95.2113	56.1466	0.410295
3425401B19Rik	17.8789	20.995	0.148421	12.0113	14.7674	0.186635	1.30426	0	1
3632451O06Rik	27.207	13.3605	0.508934	38.703	39.1657	0.0118137	14.3469	18.7155	0.233422
3632454L22Rik	7.77344	20.995	0.629748	6.00564	8.34679	0.280485	0	14.0366	1
3632454L22Rik	7.77344	1.90864	0.754467	6.00564	8.34679	0.280485	27.3895	23.3944	0.145864
3632454L22Rik	7.77344	1.90864	0.754467	6.00564	7.06267	0.149664	27.3895	23.3944	0.145864
3830403N18Rik	8.55078	3.81727	0.553576	8.67481	7.70473	0.111828	6.52132	11.6972	0.442489
3830406C13Rik	255.746	51.5332	0.798499	346.993	316.536	0.087773	255.636	262.017	0.0243552
3830408C21Rik	210.66	57.2591	0.728192	246.231	301.127	0.1823	549.095	444.494	0.190498
3830417A13Rik	6.21875	3.81727	0.386167	4.00376	1.92618	0.518907	7.82558	14.0366	0.442489
3830431G21Rik	23.3203	22.9036	0.0178671	34.032	60.3537	0.436125	39.1279	44.4494	0.119719
3930402G23Rik	22.543	20.995	0.0686671	12.6786	10.915	0.139096	16.9554	21.055	0.194706
4430402I18Rik	217.656	78.2541	0.640469	238.224	289.569	0.177317	393.888	332.2	0.156611
4632411B12Rik	199.777	66.8023	0.665616	232.218	246.551	0.058135	550.399	376.65	0.315679
4632415K11Rik	108.051	36.2641	0.664379	146.805	219.585	0.331445	144.773	105.275	0.27283
4632415L05Rik	96.3906	38.1727	0.603979	136.795	148.316	0.0776781	106.95	56.1466	0.475019
4632427E13Rik	419.765	74.4368	0.82267	698.656	642.703	0.080087	567.355	404.723	0.286649
4632428C04Rik	73.0703	36.2641	0.503709	52.7162	68.7005	0.232667	100.428	65.5043	0.347751
4632428N05Rik	27.9844	34.3555	0.185446	27.359	48.7966	0.439325	27.3895	37.431	0.268266
4632434I11Rik	258.855	66.8023	0.741932	428.402	513.649	0.165962	349.543	294.769	0.1567
4732415M23Rik	267.406	85.8886	0.678808	411.053	392.941	0.0440613	476.056	397.705	0.164585
4732416N19Rik	499.832	133.605	0.732701	806.758	850.731	0.0516884	1121.67	809.446	0.278354
4732418C07Rik	216.879	55.3505	0.744786	270.921	283.149	0.0431847	326.066	236.283	0.275351
4732456N10Rik	18.6562	26.7209	0.301811	14.0132	12.1992	0.12945	32.6066	4.67888	0.856505
4732471D19Rik	59.0781	28.6295	0.515395	90.7519	130.98	0.307134	279.113	156.742	0.438426
4732471J01Rik	94.8359	34.3555	0.637738	144.803	172.714	0.161606	211.291	194.173	0.081013
4732490B19Rik	63.7422	22.9036	0.640683	71.4004	102.088	0.300597	59.9962	56.1466	0.0641641
4732491K20Rik	136.812	45.8073	0.665182	175.498	215.09	0.184072	135.643	250.32	0.45812
4831426I19Rik	20.2109	17.1777	0.150077	53.3835	55.8593	0.0443224	24.781	44.4494	0.442489
4831426I19Rik	60.6328	20.995	0.653735	18.0169	19.2618	0.0646306	113.471	63.1649	0.443339
4831440E17Rik	427.539	116.427	0.727681	514.483	531.626	0.0322466	888.204	570.823	0.357329
4832428D23Rik	9.32812	19.0864	0.511268	9.34211	5.77855	0.381451	18.2597	44.4494	0.589202
4833403I15Rik	10.1055	15.2691	0.338175	14.0132	17.9777	0.220525	22.1725	9.35776	0.577956
4833412C05Rik	23.3203	19.0864	0.181556	18.0169	12.1992	0.322906	29.9981	18.7155	0.376109
4833417C18Rik	94.0586	38.1727	0.59416	111.438	163.726	0.319361	96.5155	72.5226	0.248591
4833418N02Rik	303.941	101.158	0.66718	403.045	452.653	0.109593	691.26	386.008	0.441588
4833419F23Rik	59.8555	24.8123	0.585463	54.0508	87.9623	0.385524	103.037	65.5043	0.364263
4833420G17Rik	149.25	45.8073	0.693083	264.248	337.724	0.217562	161.729	142.706	0.117622
4833422C13Rik	48.9726	41.99	0.142582	84.7463	131.622	0.356141	160.424	177.797	0.0977119
4833422C13Rik	48.9726	41.99	0.142582	84.7463	131.622	0.356141	160.424	177.797	0.0977119
4833422C13Rik	48.9726	41.99	0.142582	84.7463	131.622	0.356141	160.424	177.797	0.0977119
4833423E24Rik	13.9922	17.1777	0.185446	11.344	10.915	0.0378133	13.0426	18.7155	0.303111
4833424O15Rik	14.7695	24.8123	0.404749	14.0132	12.8412	0.0836317	7.82558	25.7338	0.695903
4833427F10Rik	14.7695	15.2691	0.0327174	16.015	22.4721	0.287338	22.1725	49.1282	0.548681
4833427G06Rik	21.7656	17.1777	0.210786	13.3459	26.9666	0.505096	26.0853	18.7155	0.282526
4833428L15Rik	13.2148	20.995	0.370572	10.0094	5.77855	0.422688	48.2578	44.4494	0.0789182
4833439L19Rik	244.863	80.1627	0.672622	311.626	310.757	0.00278723	506.054	280.733	0.445252
4833442J19Rik	202.887	34.3555	0.830667	313.628	236.92	0.244581	251.723	194.173	0.228622
4921501E09Rik	14.7695	19.0864	0.226174	13.3459	17.9777	0.257643	19.564	0	1
4921504E06Rik	23.3203	15.2691	0.345245	21.3534	31.461	0.321274	19.564	16.3761	0.162947
4921506M07Rik	13.9922	11.4518	0.181556	10.0094	9.63091	0.0378133	9.12985	32.7522	0.721244
4921507L20Rik	19.4336	11.4518	0.41072	15.3477	16.6936	0.0806198	16.9554	7.01832	0.586073
4921507P07Rik	47.418	41.99	0.11447	86.0809	91.1726	0.0558478	79.5601	49.1282	0.382502
4921508A21Rik	15.5469	17.1777	0.0949403	16.6823	12.8412	0.230251	39.1279	9.35776	0.760842
4921508D12Rik	11.6602	13.3605	0.127264	12.0113	10.915	0.0912681	0	16.3761	1
4921509C19Rik	20.9883	11.4518	0.454371	11.344	10.915	0.0378133	11.7384	7.01832	0.402105
4921509O07Rik	14.7695	17.1777	0.140193	10.6767	8.34679	0.218223	15.6512	9.35776	0.402105
4921510H08Rik	10.1055	24.8123	0.592723	11.344	12.8412	0.116596	0	32.7522	1
4921511C10Rik	12.4375	19.0864	0.348357	23.3553	10.915	0.532652	6.52132	4.67888	0.282526
4921511C20Rik	6.21875	3.81727	0.386167	5.33835	4.49443	0.158087	1.30426	2.33944	0.442489
4921511H03Rik	11.6602	7.63455	0.345245	13.3459	5.13649	0.615125	10.4341	2.33944	0.775789
4921511I17Rik	18.6562	26.7209	0.301811	10.6767	7.06267	0.338497	3.91279	7.01832	0.442489
4921511M17Rik	8.55078	9.54318	0.103991	4.67105	3.85237	0.175269	7.82558	9.35776	0.163733
4921511M17Rik	5.4414	11.4518	0.524844	7.34023	5.13649	0.300228	3.91279	4.67888	0.163733
4921511M17Rik	6.99609	15.2691	0.541814	5.33835	1.28412	0.759453	5.21706	4.67888	0.103157
4921511M17Rik	3.88672	11.4518	0.660603	8.67481	0.642061	0.925986	3.91279	2.33944	0.402105
4921513D23Rik	146.141	34.3555	0.764915	206.861	224.721	0.0794777	168.25	189.495	0.112112
4921513I03Rik	14.7695	26.7209	0.447267	14.0132	13.4833	0.0378133	2.60853	9.35776	0.721244
4921513I03Rik	14.7695	26.7209	0.447267	14.0132	13.4833	0.0378133	2.60853	9.35776	0.721244
4921515E04Rik	17.1016	13.3605	0.218758	10.6767	3.85237	0.63918	3.91279	7.01832	0.442489
4921515J06Rik	21.7656	19.0864	0.123096	13.3459	16.6936	0.200539	3.91279	4.67888	0.163733
4921515J06Rik	23.3203	26.7209	0.127264	12.6786	14.1253	0.102423	18.2597	7.01832	0.615639
4921517D21Rik	25.6523	15.2691	0.404768	24.6899	25.0404	0.0139981	33.9109	30.4127	0.103157
4921517D22Rik	12.4375	26.7209	0.534541	15.3477	6.42061	0.581658	13.0426	21.055	0.380543
4921517L17Rik	282.176	72.5282	0.742968	375.686	457.789	0.179347	696.477	402.384	0.422259
4921523A10Rik	10.1055	15.2691	0.338175	8.67481	9.63091	0.0992739	14.3469	16.3761	0.123911
4921524J17Rik	144.586	32.4468	0.775588	150.141	188.766	0.204618	127.818	161.421	0.208172
4921524L21Rik	13.2148	11.4518	0.133412	12.0113	5.13649	0.572361	20.8682	9.35776	0.551579
4921525B02Rik	13.9922	13.3605	0.0451486	14.0132	7.70473	0.450179	9.12985	32.7522	0.721244
4921525O09Rik	17.1016	24.8123	0.310762	16.6823	9.63091	0.422688	14.3469	16.3761	0.123911
4921528I01Rik	20.2109	17.1777	0.150077	9.34211	5.77855	0.381451	6.52132	0	1
4921528O07Rik	17.8789	26.7209	0.330902	15.3477	14.1253	0.0796475	9.12985	21.055	0.56638
4921530D09Rik	13.2148	32.4468	0.592723	14.0132	14.7674	0.0510745	7.82558	18.7155	0.581867
4921530L18Rik	371.57	76.3455	0.794533	720.677	653.618	0.0930499	599.962	463.209	0.227935
4921530L21Rik	18.6562	17.1777	0.0792504	6.67293	3.85237	0.422688	6.52132	11.6972	0.442489
4921531C22Rik	310.937	76.3455	0.754467	325.639	448.158	0.273384	993.849	650.364	0.345611
4921531P14Rik	11.6602	7.63455	0.345245	11.344	5.13649	0.547206	18.2597	0	1
4921533I20Rik	18.6562	15.2691	0.181556	16.015	0.642061	0.959909	0	0	0
4921536K21Rik	116.602	30.5382	0.738098	151.476	147.674	0.0250972	86.0814	58.486	0.320574
4921539E11Rik	17.1016	9.54318	0.44197	13.3459	7.70473	0.422688	3.91279	0	1
4922501C03Rik	91.7265	22.9036	0.750305	120.78	137.401	0.120966	58.6919	88.8987	0.339789
4922501L14Rik	17.1016	15.2691	0.107152	9.34211	7.06267	0.243996	18.2597	2.33944	0.87188
4922502D21Rik	20.2109	22.9036	0.117567	16.015	8.34679	0.478816	1.30426	18.7155	0.930311
4922502H24Rik	17.1016	3.81727	0.776788	16.6823	9.63091	0.422688	9.12985	4.67888	0.487518
4922502N22Rik	11.6602	19.0864	0.389085	10.6767	7.06267	0.338497	13.0426	28.0733	0.535407
4922505E12Rik	17.1016	13.3605	0.218758	9.34211	2.56824	0.72509	0	7.01832	1
4922505G16Rik	397.223	89.7059	0.774167	496.466	536.763	0.0750733	662.566	509.998	0.230269
4930401C15Rik	15.5469	11.4518	0.2634	16.015	8.98885	0.438724	41.7365	7.01832	0.831842
4930401O10Rik	13.9922	13.3605	0.0451486	7.34023	3.85237	0.475171	22.1725	4.67888	0.788978
4930401O12Rik	10.8828	7.63455	0.298477	21.3534	6.42061	0.699317	39.1279	16.3761	0.581473
4930402F06Rik	23.3203	20.995	0.0997115	21.3534	16.6936	0.218223	7.82558	7.01832	0.103157
4930402F11Rik	9.32812	13.3605	0.301811	12.0113	4.49443	0.625816	14.3469	23.3944	0.386738
4930402H24Rik	106.496	49.6245	0.534025	97.4248	111.719	0.127944	168.25	119.311	0.290869
4930403N07Rik	17.8789	19.0864	0.0632632	12.0113	7.70473	0.358542	15.6512	28.0733	0.442489
4930404A05Rik	13.9922	11.4518	0.181556	8.67481	5.77855	0.333871	10.4341	14.0366	0.256652
4930404A10Rik	14.7695	15.2691	0.0327174	8.67481	5.13649	0.407885	10.4341	16.3761	0.362844
4930404H11Rik	8.55078	5.72591	0.330364	12.0113	8.34679	0.305087	14.3469	11.6972	0.184688
4930404H21Rik	24.875	11.4518	0.539625	17.3496	16.6936	0.0378133	28.6938	30.4127	0.0565193
4930404I05Rik	270.516	68.7109	0.746	398.374	417.982	0.0469098	508.663	357.934	0.296323
4930404N11Rik	35.7578	34.3555	0.0392179	48.0451	61.6378	0.220525	50.8663	109.954	0.537384
4930405A10Rik	12.4375	11.4518	0.0792504	16.6823	4.49443	0.730588	11.7384	9.35776	0.202806
4930405A21Rik	222.32	108.792	0.510651	314.963	411.561	0.234713	525.618	390.686	0.256711
4930405D11Rik	13.9922	9.54318	0.317963	11.344	7.06267	0.377409	11.7384	7.01832	0.402105
4930405J17Rik	47.418	36.2641	0.235224	60.0564	102.73	0.415394	57.3876	84.2198	0.318597
4930405P13Rik	18.6562	19.0864	0.0225355	20.6861	16.0515	0.224043	6.52132	18.7155	0.651555
4930406D18Rik	13.9922	28.6295	0.511268	16.015	17.9777	0.109172	19.564	39.7705	0.508078
4930407I10Rik	20.2109	15.2691	0.244513	20.6861	12.1992	0.410273	37.8237	14.0366	0.628893
4930408F14Rik	10.1055	3.81727	0.622257	8.00752	5.77855	0.27836	9.12985	11.6972	0.219484
4930412B13Rik	21.7656	20.995	0.0354052	12.6786	10.915	0.139096	32.6066	11.6972	0.641263
4930412C18Rik	48.1953	30.5382	0.366366	73.4023	82.1838	0.106852	57.3876	9.35776	0.836938
4930412F15Rik	73.8476	28.6295	0.612316	92.7538	113.645	0.183827	123.905	149.724	0.172444
4930412O13Rik	24.875	28.6295	0.131143	17.3496	12.1992	0.296864	18.2597	30.4127	0.399603
4930413E15Rik	20.9883	17.1777	0.181556	12.6786	11.5571	0.0884547	15.6512	7.01832	0.551579
4930413F20Rik	17.1016	24.8123	0.310762	16.6823	6.42061	0.615125	1.30426	16.3761	0.920356
4930413G21Rik	565.906	179.412	0.682965	715.339	755.064	0.0526115	1107.32	856.235	0.22675
4930413M19Rik	14.7695	17.1777	0.140193	12.6786	8.34679	0.341662	6.52132	9.35776	0.303111
4930414L22Rik	162.465	34.3555	0.788536	207.528	198.397	0.044001	332.587	229.265	0.310662
4930414N06Rik	20.2109	20.995	0.0373456	34.6993	32.7451	0.0563169	14.3469	32.7522	0.561955
4930415F15Rik	17.8789	7.63455	0.572986	12.0113	7.06267	0.411997	0	4.67888	1
4930415L06Rik	4.66406	5.72591	0.185446	8.00752	1.28412	0.839636	0	0	0
4930415O20Rik	20.2109	13.3605	0.338949	21.3534	32.7451	0.347891	15.6512	18.7155	0.163733
4930417G10Rik	17.1016	11.4518	0.330364	15.3477	7.06267	0.539824	9.12985	32.7522	0.721244
4930417O13Rik	20.2109	17.1777	0.150077	21.3534	26.3245	0.18884	9.12985	18.7155	0.512178
4930417O22Rik	26.4297	28.6295	0.0768391	15.3477	17.9777	0.14629	3.91279	11.6972	0.665493
4930419G24Rik	8.55078	11.4518	0.253326	6.00564	7.06267	0.149664	0	2.33944	1
4930420K17Rik	238.644	62.985	0.736072	324.305	338.366	0.041557	539.965	383.668	0.289458
4930422G04Rik	146.141	38.1727	0.738794	210.865	261.319	0.193075	113.471	145.045	0.217686
4930423M02Rik	10.8828	5.72591	0.473857	11.344	5.77855	0.490607	19.564	14.0366	0.282526
4930425K10Rik	10.8828	22.9036	0.524844	20.0188	8.98885	0.55098	52.1706	16.3761	0.686105
4930425O10Rik	17.8789	7.63455	0.572986	12.6786	9.63091	0.240379	9.12985	25.7338	0.64522
4930426L09Rik	26.4297	9.54318	0.638922	25.3572	16.0515	0.366982	49.562	58.486	0.152583
4930427A07Rik	187.34	66.8023	0.643416	277.594	276.728	0.00311907	249.114	168.44	0.323846
4930428D18Rik	4.66406	7.63455	0.389085	6.67293	4.49443	0.326469	0	0	0
4930428E07Rik	13.2148	11.4518	0.133412	16.6823	4.49443	0.730588	6.52132	9.35776	0.303111
4930428E23Rik	6.21875	3.81727	0.386167	8.00752	7.70473	0.0378133	11.7384	32.7522	0.6416
4930428G15Rik	17.8789	15.2691	0.145971	26.0244	10.915	0.580585	41.7365	9.35776	0.775789
4930428O21Rik	16.3242	20.995	0.222471	9.34211	8.98885	0.0378133	26.0853	7.01832	0.730947
4930429B21Rik	108.828	49.6245	0.54401	185.508	251.688	0.262946	237.376	250.32	0.0517097
4930429D17Rik	19.4336	20.995	0.0743707	10.6767	6.42061	0.398633	43.0407	35.0916	0.184688
4930429F11Rik	17.8789	15.2691	0.145971	14.0132	9.63091	0.312724	5.21706	9.35776	0.442489
4930429F24Rik	165.574	55.3505	0.665706	247.566	264.529	0.0641261	254.332	308.806	0.176404
4930430A15Rik	14.7695	13.3605	0.095404	13.3459	5.13649	0.615125	9.12985	11.6972	0.219484
4930430D24Rik	7.77344	13.3605	0.418176	5.33835	1.28412	0.759453	18.2597	2.33944	0.87188
4930430F08Rik	37.3125	15.2691	0.590778	60.0564	71.2688	0.157325	24.781	53.8071	0.539447
4930430F21Rik	16.3242	22.9036	0.287265	10.6767	7.06267	0.338497	6.52132	23.3944	0.721244
4930430J02Rik	17.8789	24.8123	0.279433	18.6842	9.63091	0.484543	0	39.7705	1
4930431A04Rik	11.6602	13.3605	0.127264	12.0113	9.63091	0.198178	3.91279	21.055	0.814163
4930431P03Rik	17.8789	19.0864	0.0632632	11.344	8.98885	0.207611	6.52132	16.3761	0.601778
4930432J09Rik	20.2109	22.9036	0.117567	21.3534	15.4095	0.27836	35.2151	37.431	0.0591996
4930432K09Rik	15.5469	15.2691	0.0178671	13.3459	3.85237	0.711344	14.3469	7.01832	0.510813
4930432K21Rik	217.656	70.6196	0.675545	224.211	271.592	0.174457	196.944	236.283	0.166493
4930432M17Rik	13.9922	22.9036	0.389085	18.6842	7.06267	0.621998	15.6512	16.3761	0.0442663
4930433B08Rik	8.55078	7.63455	0.107152	12.6786	5.13649	0.594869	6.52132	37.431	0.825778
4930433I11Rik	9.32812	15.2691	0.389085	10.0094	5.77855	0.422688	1.30426	35.0916	0.962833
4930433N12Rik	21.7656	22.9036	0.0496873	14.6805	8.34679	0.431435	22.1725	7.01832	0.683467
4930434J06Rik	10.1055	17.1777	0.411711	11.344	8.98885	0.207611	9.12985	4.67888	0.487518
4930435E12Rik	20.2109	13.3605	0.338949	16.015	8.34679	0.478816	11.7384	9.35776	0.202806
4930438E09Rik	16.3242	15.2691	0.0646354	8.67481	7.06267	0.185842	3.91279	23.3944	0.832747
4930440C22Rik	17.1016	5.72591	0.665182	13.3459	10.915	0.182141	10.4341	25.7338	0.594537
4930441J16Rik	13.9922	13.3605	0.0451486	16.6823	12.8412	0.230251	19.564	7.01832	0.641263
4930441O14Rik	62.9648	30.5382	0.514996	98.7594	136.759	0.277858	69.126	67.8438	0.0185494
4930442J19Rik	18.6562	9.54318	0.488472	16.015	8.34679	0.478816	14.3469	18.7155	0.233422
4930442L01Rik	51.3047	53.4418	0.0399902	76.0715	122.634	0.379685	146.078	123.99	0.151202
4930443G12Rik	13.9922	20.995	0.333547	12.6786	10.273	0.189738	31.3023	11.6972	0.626316
4930443O20Rik	13.9922	17.1777	0.185446	25.3572	35.3133	0.281939	14.3469	37.431	0.616711
4930444A02Rik	69.9609	40.0814	0.427089	104.098	121.992	0.146681	110.862	102.935	0.0715039
4930444F02Rik	19.4336	15.2691	0.214294	18.0169	18.6198	0.0323765	19.564	21.055	0.0708145
4930444F02Rik	19.4336	15.2691	0.214294	18.0169	18.6198	0.0323765	19.564	21.055	0.0708145
4930444G20Rik	13.9922	17.1777	0.185446	12.0113	8.98885	0.251633	13.0426	21.055	0.380543
4930444M15Rik	19.4336	19.0864	0.0178671	26.0244	24.3983	0.0624848	43.0407	23.3944	0.456459
4930444P10Rik	22.543	24.8123	0.0914593	29.3609	30.1769	0.0270389	43.0407	16.3761	0.619521
4930447A16Rik	16.3242	24.8123	0.342091	19.3515	8.34679	0.568675	14.3469	9.35776	0.347751
4930447C04Rik	16.3242	5.72591	0.649238	12.0113	10.273	0.144723	16.9554	18.7155	0.0940441
4930447J18Rik	14.7695	19.0864	0.226174	14.0132	5.13649	0.633453	2.60853	14.0366	0.814163
4930447K03Rik	20.9883	38.1727	0.450176	33.3647	28.8927	0.134032	13.0426	14.0366	0.0708145
4930447N08Rik	11.6602	26.7209	0.563632	18.6842	5.77855	0.690726	14.3469	23.3944	0.386738
4930448C13Rik	13.2148	11.4518	0.133412	10.6767	4.49443	0.579043	7.82558	11.6972	0.330986
4930448F12Rik	16.3242	13.3605	0.181556	16.015	14.7674	0.0779044	20.8682	11.6972	0.439473
4930448H16Rik	17.1016	24.8123	0.310762	16.6823	9.63091	0.422688	0	16.3761	1
4930448I06Rik	10.8828	17.1777	0.366458	10.0094	1.92618	0.807563	5.21706	9.35776	0.442489
4930448I18Rik	15.5469	11.4518	0.2634	14.0132	7.70473	0.450179	22.1725	9.35776	0.577956
4930448K20Rik	14.7695	13.3605	0.095404	10.6767	5.77855	0.45877	10.4341	9.35776	0.103157
4930449E01Rik	10.1055	22.9036	0.558783	11.344	17.9777	0.368997	11.7384	23.3944	0.49824
4930449E18Rik	38.0898	28.6295	0.248368	38.703	55.2172	0.299077	35.2151	37.431	0.0591996
4930449I24Rik	13.9922	24.8123	0.436078	13.3459	7.70473	0.422688	11.7384	21.055	0.442489
4930451C15Rik	29.5391	41.99	0.296522	18.0169	43.6601	0.587337	22.1725	37.431	0.407644
4930451I11Rik	16.3242	22.9036	0.287265	18.6842	26.9666	0.307134	10.4341	23.3944	0.553991
4930452A19Rik	13.2148	5.72591	0.566706	6.00564	1.92618	0.679271	19.564	4.67888	0.760842
4930452B06Rik	13.9922	11.4518	0.181556	23.3553	20.5459	0.120286	31.3023	23.3944	0.252631
4930452G13Rik	19.4336	9.54318	0.508934	16.015	10.273	0.358542	31.3023	56.1466	0.442489
4930452N14Rik	17.1016	17.1777	0.00443431	12.6786	8.34679	0.341662	6.52132	2.33944	0.641263
4930453H23Rik	5.4414	11.4518	0.524844	5.33835	4.49443	0.158087	15.6512	4.67888	0.701052
4930453N24Rik	149.25	43.8986	0.705872	254.906	270.95	0.0592124	294.764	156.742	0.468244
4930455B14Rik	16.3242	13.3605	0.181556	24.0226	19.9039	0.17145	32.6066	18.7155	0.426021
4930455C13Rik	19.4336	11.4518	0.41072	10.6767	10.915	0.0218359	10.4341	2.33944	0.775789
4930455C21Rik	197.445	53.4418	0.729333	303.619	366.617	0.171837	249.114	184.816	0.258109
4930455D15Rik	135.258	43.8986	0.675445	164.154	190.05	0.136258	53.4748	91.2381	0.413898
4930455F16Rik	18.6562	19.0864	0.0225355	15.3477	14.1253	0.0796475	15.6512	21.055	0.256652
4930455F16Rik	17.8789	22.9036	0.219386	19.3515	11.5571	0.402781	28.6938	21.055	0.26622
4930455F23Rik	38.0898	13.3605	0.649238	54.0508	55.2172	0.021125	57.3876	11.6972	0.796172
4930455H04Rik	17.1016	22.9036	0.253326	10.0094	10.273	0.0256569	20.8682	9.35776	0.551579
4930455J16Rik	17.1016	13.3605	0.218758	20.0188	4.49443	0.77549	3.91279	23.3944	0.832747
4930456L15Rik	14.7695	15.2691	0.0327174	12.0113	10.273	0.144723	5.21706	11.6972	0.553991
4930458L03Rik	14.7695	17.1777	0.140193	17.3496	3.85237	0.777957	1.30426	14.0366	0.907081
4930459L07Rik	13.2148	11.4518	0.133412	13.3459	4.49443	0.663235	5.21706	11.6972	0.553991
4930461G14Rik	19.4336	9.54318	0.508934	22.0207	14.1253	0.358542	37.8237	21.055	0.443339
4930465A12Rik	17.1016	32.4468	0.472936	11.344	7.70473	0.320809	11.7384	9.35776	0.202806
4930465K10Rik	336.59	104.975	0.688122	413.722	432.107	0.0425474	713.432	535.732	0.249079
4930465M20Rik	22.543	19.0864	0.153334	18.0169	7.06267	0.607998	3.91279	28.0733	0.860622
4930467D21Rik	13.9922	24.8123	0.436078	14.6805	3.2103	0.781321	14.3469	14.0366	0.0216261
4930467E23Rik	74.625	70.6196	0.0536741	54.0508	22.4721	0.58424	70.4303	56.1466	0.202806
4930467K11Rik	87.0625	30.5382	0.649238	126.118	134.191	0.0601551	114.775	98.2565	0.143923
4930468A15Rik	6.21875	5.72591	0.0792504	5.33835	2.56824	0.518907	0	0	0
4930469G21Rik	18.6562	13.3605	0.283861	14.0132	15.4095	0.0906131	15.6512	11.6972	0.252631
4930470H14Rik	21.7656	11.4518	0.473857	8.67481	3.85237	0.555914	10.4341	9.35776	0.103157
4930470P17Rik	11.6602	17.1777	0.321205	8.67481	5.77855	0.333871	0	4.67888	1
4930471C04Rik	17.1016	20.995	0.185446	14.6805	13.4833	0.0815491	14.3469	21.055	0.318597
4930471G03Rik	18.6562	24.8123	0.248104	14.6805	8.34679	0.431435	9.12985	39.7705	0.770437
4930471I20Rik	15.5469	17.1777	0.0949403	22.688	16.0515	0.29251	23.4768	44.4494	0.471831
4930471M09Rik	112.715	19.0864	0.830667	196.184	240.131	0.183011	110.862	105.275	0.0504018
4930471M23Rik	82.3984	47.7159	0.420912	123.449	180.419	0.315764	122.601	81.8804	0.332138
4930473A02Rik	120.488	38.1727	0.683183	194.85	226.647	0.140296	211.291	212.889	0.00750732
4930473A06Rik	94.8359	28.6295	0.698115	120.113	152.168	0.210659	122.601	128.669	0.0471625
4930473O22Rik	15.5469	11.4518	0.2634	18.0169	6.42061	0.643635	5.21706	0	1
4930474G06Rik	10.1055	5.72591	0.433385	11.344	4.49443	0.603805	10.4341	0	1
4930474H20Rik	15.5469	15.2691	0.0178671	12.6786	5.13649	0.594869	5.21706	11.6972	0.553991
4930474M22Rik	20.9883	19.0864	0.0906177	15.3477	16.0515	0.0438446	11.7384	28.0733	0.581867
4930474N05Rik	11.6602	15.2691	0.236356	15.3477	5.13649	0.665326	3.91279	9.35776	0.581867
4930474N09Rik	14.7695	20.995	0.296522	8.67481	12.1992	0.2889	15.6512	18.7155	0.163733
4930478L05Rik	9.32812	9.54318	0.0225355	16.015	1.92618	0.879727	5.21706	9.35776	0.442489
4930478P22Rik	18.6562	19.0864	0.0225355	16.6823	6.42061	0.615125	33.9109	14.0366	0.586073
4930479D17Rik	14.7695	15.2691	0.0327174	14.0132	12.8412	0.0836317	15.6512	39.7705	0.606463
4930479M11Rik	24.0976	22.9036	0.0495489	16.015	14.1253	0.117996	16.9554	23.3944	0.275235
4930480E11Rik	6.21875	7.63455	0.185446	3.33647	1.28412	0.615125	0	0	0
4930480G23Rik	10.1055	19.0864	0.47054	12.6786	5.13649	0.594869	7.82558	18.7155	0.581867
4930480K15Rik	13.9922	13.3605	0.0451486	18.0169	6.42061	0.643635	18.2597	32.7522	0.442489
4930480M12Rik	12.4375	13.3605	0.0690814	11.344	5.13649	0.547206	0	18.7155	1
4930481A15Rik	159.355	43.8986	0.724524	212.867	254.898	0.164895	114.775	44.4494	0.612727
4930481A15Rik	159.355	43.8986	0.724524	212.867	254.898	0.164895	114.775	44.4494	0.612727
4930483J18Rik	171.793	38.1727	0.777798	226.88	249.762	0.091615	313.023	308.806	0.0134729
4930483K19Rik	14.7695	17.1777	0.140193	13.3459	8.34679	0.374579	14.3469	28.0733	0.488948
4930483O08Rik	16.3242	17.1777	0.0496873	12.0113	15.4095	0.220525	10.4341	7.01832	0.327368
4930486F22Rik	15.5469	13.3605	0.140634	10.6767	10.915	0.0218359	22.1725	16.3761	0.261424
4930486I03Rik	12.4375	28.6295	0.565571	12.0113	6.42061	0.465452	15.6512	14.0366	0.103157
4930486L24Rik	15.5469	19.0864	0.185446	18.6842	0.642061	0.965636	9.12985	11.6972	0.219484
4930487D11Rik	9.32812	26.7209	0.650906	12.0113	4.49443	0.625816	5.21706	11.6972	0.553991
4930487H11Rik	17.1016	20.995	0.185446	11.344	7.06267	0.377409	20.8682	23.3944	0.107982
4930488B22Rik	18.6562	15.2691	0.181556	12.0113	8.98885	0.251633	39.1279	23.3944	0.402105
4930488L21Rik	27.9844	15.2691	0.454371	30.6955	17.3356	0.435238	1.30426	7.01832	0.814163
4930500F04Rik	22.543	17.1777	0.238	12.6786	16.0515	0.210133	15.6512	11.6972	0.252631
4930500J02Rik	21.7656	22.9036	0.0496873	15.3477	12.8412	0.163316	6.52132	23.3944	0.721244
4930500J02Rik	21.7656	17.1777	0.210786	18.0169	14.1253	0.215996	6.52132	21.055	0.690271
4930500L23Rik	17.8789	26.7209	0.330902	19.3515	12.8412	0.336423	49.562	25.7338	0.480775
4930502A04Rik	15.5469	20.995	0.259497	12.0113	6.42061	0.465452	37.8237	7.01832	0.814446
4930502E09Rik	300.832	83.98	0.720841	469.775	404.498	0.138952	575.18	416.42	0.276018
4930502E18Rik	6.99609	7.63455	0.083627	8.00752	3.85237	0.518907	11.7384	0	1
4930503B20Rik	20.9883	13.3605	0.363432	14.0132	16.0515	0.126989	1.30426	28.0733	0.953541
4930503E14Rik	23.3203	17.1777	0.2634	16.015	4.49443	0.719362	7.82558	14.0366	0.442489
4930503E24Rik	14.7695	17.1777	0.140193	7.34023	3.85237	0.475171	15.6512	11.6972	0.252631
4930503H13Rik	10.1055	9.54318	0.0556415	6.00564	7.70473	0.220525	1.30426	21.055	0.938054
4930503L19Rik	26.4297	26.7209	0.010899	27.359	34.0292	0.196014	26.0853	49.1282	0.469037
4930503O07Rik	19.4336	15.2691	0.214294	24.6899	15.4095	0.375879	14.3469	16.3761	0.123911
4930504O13Rik	12.4375	28.6295	0.565571	6.67293	5.13649	0.230251	2.60853	30.4127	0.914229
4930505A04Rik	12.4375	11.4518	0.0792504	19.3515	17.9777	0.0709922	7.82558	16.3761	0.522133
4930505G20Rik	24.875	17.1777	0.309438	13.3459	7.70473	0.422688	6.52132	4.67888	0.282526
4930506M07Rik	38.8672	22.9036	0.41072	35.3666	39.1657	0.0970022	67.8217	42.1099	0.379109
4930507D05Rik	226.207	45.8073	0.797498	325.639	331.945	0.0189979	275.2	269.036	0.0223989
4930509E16Rik	309.383	74.4368	0.759402	385.696	461.642	0.164513	679.522	587.199	0.135864
4930509J09Rik	17.1016	19.0864	0.103991	10.6767	5.13649	0.518907	1.30426	16.3761	0.920356
4930509K18Rik	14.7695	15.2691	0.0327174	16.6823	11.5571	0.307226	29.9981	35.0916	0.145149
4930511A02Rik	13.2148	7.63455	0.422275	10.6767	3.85237	0.63918	0	2.33944	1
4930511E03Rik	12.4375	17.1777	0.275952	13.3459	9.63091	0.27836	27.3895	21.055	0.231278
4930511I11Rik	16.3242	11.4518	0.298477	23.3553	16.6936	0.285233	22.1725	16.3761	0.261424
4930511M06Rik	16.3242	17.1777	0.0496873	26.0244	46.2284	0.437046	13.0426	16.3761	0.203555
4930511M06Rik	16.3242	17.1777	0.0496873	26.0244	46.2284	0.437046	13.0426	16.3761	0.203555
4930511M06Rik	15.5469	20.995	0.259497	32.0301	48.1546	0.334848	15.6512	16.3761	0.0442663
4930511M11Rik	17.1016	13.3605	0.218758	12.6786	7.06267	0.442945	19.564	39.7705	0.508078
4930512B01Rik	27.207	15.2691	0.438781	38.703	35.3133	0.0875816	28.6938	25.7338	0.103157
4930513D17Rik	17.1016	15.2691	0.107152	12.0113	10.273	0.144723	10.4341	7.01832	0.327368
4930513N10Rik	296.168	104.975	0.645556	377.021	445.59	0.153885	633.872	538.071	0.151136
4930513O06Rik	10.1055	9.54318	0.0556415	5.33835	5.77855	0.0761784	5.21706	7.01832	0.256652
4930515B02Rik	18.6562	34.3555	0.456964	8.67481	16.0515	0.459564	27.3895	14.0366	0.487518
4930515G01Rik	297.723	59.1677	0.801266	357.669	465.494	0.231635	575.18	481.925	0.162133
4930515G16Rik	8.55078	11.4518	0.253326	16.015	8.98885	0.438724	5.21706	11.6972	0.553991
4930515L03Rik	13.2148	20.995	0.370572	16.015	3.2103	0.799544	13.0426	9.35776	0.282526
4930515L19Rik	9.32812	5.72591	0.386167	2.66917	3.2103	0.168561	10.4341	9.35776	0.103157
4930517E11Rik	14.7695	11.4518	0.224632	10.6767	5.77855	0.45877	15.6512	16.3761	0.0442663
4930518P08Rik	17.8789	13.3605	0.252725	8.67481	5.13649	0.407885	6.52132	28.0733	0.767704
4930519D14Rik	14.7695	7.63455	0.483088	16.015	4.49443	0.719362	9.12985	2.33944	0.743759
4930519F09Rik	17.8789	1.90864	0.893246	12.0113	6.42061	0.465452	6.52132	11.6972	0.442489
4930519F16Rik	9.32812	5.72591	0.386167	13.3459	8.34679	0.374579	3.91279	11.6972	0.665493
4930519F24Rik	10.1055	7.63455	0.244513	8.00752	1.92618	0.759453	14.3469	2.33944	0.836938
4930519G04Rik	15.5469	17.1777	0.0949403	14.6805	10.915	0.256492	14.3469	23.3944	0.386738
4930519H02Rik	15.5469	26.7209	0.418176	14.6805	6.42061	0.562642	33.9109	9.35776	0.724048
4930520O04Rik	45.0859	26.7209	0.407334	68.7312	90.5306	0.240796	43.0407	49.1282	0.123911
4930520O04Rik	46.6406	26.7209	0.427089	60.7237	73.1949	0.170384	45.6492	49.1282	0.0708145
4930520P13Rik	10.1055	26.7209	0.621814	8.67481	0.642061	0.925986	35.2151	21.055	0.402105
4930521A18Rik	10.8828	17.1777	0.366458	12.6786	7.06267	0.442945	14.3469	9.35776	0.347751
4930521E06Rik	16.3242	13.3605	0.181556	15.3477	10.915	0.288819	22.1725	16.3761	0.261424
4930522H14Rik	13.2148	9.54318	0.277843	12.6786	7.70473	0.392303	33.9109	16.3761	0.517085
4930522H14Rik	11.6602	5.72591	0.508934	13.3459	7.70473	0.422688	35.2151	16.3761	0.53497
4930522O17Rik	20.2109	13.3605	0.338949	12.0113	12.8412	0.0646306	29.9981	18.7155	0.376109
4930523C07Rik	63.7422	41.99	0.341252	78.0733	91.8147	0.149664	74.3431	86.5593	0.141131
4930523C07Rik	63.7422	41.99	0.341252	78.0733	91.8147	0.149664	74.3431	86.5593	0.141131
4930523O13Rik	13.2148	9.54318	0.277843	8.00752	3.85237	0.518907	0	7.01832	1
4930524B15Rik	16.3242	30.5382	0.465449	15.3477	2.56824	0.832663	23.4768	14.0366	0.402105
4930524C18Rik	15.5469	24.8123	0.37342	13.3459	4.49443	0.663235	11.7384	16.3761	0.2832
4930524E20Rik	6.21875	9.54318	0.348357	10.6767	4.49443	0.579043	16.9554	0	1
4930524L23Rik	71.5156	30.5382	0.572986	98.7594	109.792	0.100489	151.295	184.816	0.181376
4930524N10Rik	6.99609	7.63455	0.083627	10.6767	2.56824	0.759453	2.60853	2.33944	0.103157
4930524O05Rik	13.9922	20.995	0.333547	12.0113	17.3356	0.307134	3.91279	14.0366	0.721244
4930524O08Rik	17.1016	15.2691	0.107152	14.0132	21.188	0.338628	0	11.6972	1
4930525D18Rik	12.4375	19.0864	0.348357	15.3477	9.63091	0.372487	19.564	11.6972	0.402105
4930525F21Rik	13.2148	17.1777	0.230699	19.3515	6.42061	0.668211	7.82558	30.4127	0.742687
4930525G20Rik	51.3047	30.5382	0.404768	92.0865	134.191	0.313764	74.3431	53.8071	0.276232
4930525M21Rik	7.77344	5.72591	0.2634	4.67105	3.2103	0.312724	2.60853	2.33944	0.103157
4930526D03Rik	16.3242	13.3605	0.181556	11.344	5.77855	0.490607	28.6938	35.0916	0.182317
4930526I15Rik	279.066	55.3505	0.801658	352.998	358.912	0.016477	323.458	329.861	0.0194127
4930526I15Rik	457.855	89.7059	0.804074	547.181	540.615	0.0119985	490.403	453.851	0.0745346
4930526L06Rik	10.1055	20.995	0.518673	16.6823	7.06267	0.576638	27.3895	30.4127	0.0994048
4930527F14Rik	20.9883	17.1777	0.181556	10.0094	10.915	0.0829712	10.4341	23.3944	0.553991
4930527G23Rik	9.32812	7.63455	0.181556	14.0132	4.49443	0.679271	2.60853	7.01832	0.628326
4930528A17Rik	181.898	51.5332	0.716692	274.925	276.728	0.00651664	356.064	198.852	0.441526
4930528D03Rik	13.9922	36.2641	0.614159	16.6823	13.4833	0.191763	20.8682	37.431	0.442489
4930528F23Rik	34.2031	38.1727	0.103991	56.7199	74.4791	0.238444	83.4729	56.1466	0.327368
4930528P14Rik	12.4375	5.72591	0.539625	16.6823	12.1992	0.268738	14.3469	4.67888	0.673875
4930529C04Rik	14.7695	17.1777	0.140193	10.6767	8.98885	0.158087	18.2597	14.0366	0.231278
4930529F22Rik	24.0976	20.995	0.128753	14.0132	13.4833	0.0378133	29.9981	21.055	0.298123
4930529F24Rik	17.8789	13.3605	0.252725	15.3477	2.56824	0.832663	0	7.01832	1
4930529K09Rik	10.1055	22.9036	0.558783	14.0132	8.98885	0.358542	3.91279	51.4677	0.923976
4930529L06Rik	10.8828	11.4518	0.0496873	14.0132	8.98885	0.358542	28.6938	21.055	0.26622
4930529M08Rik	92.5039	41.99	0.546073	154.812	207.386	0.253506	202.161	121.651	0.398247
4930533B01Rik	23.3203	20.995	0.0997115	10.6767	10.273	0.0378133	18.2597	25.7338	0.29044
4930533P14Rik	17.8789	15.2691	0.145971	16.6823	3.85237	0.769075	9.12985	4.67888	0.487518
4930534B04Rik	46.6406	32.4468	0.304323	80.7425	107.866	0.251457	76.9516	74.8621	0.0271536
4930538K18Rik	16.3242	15.2691	0.0646354	20.6861	15.4095	0.255081	1.30426	28.0733	0.953541
4930539C22Rik	17.1016	20.995	0.185446	20.6861	8.34679	0.596502	23.4768	39.7705	0.409694
4930539E08Rik	98.7226	41.99	0.574667	112.773	205.459	0.45112	89.9942	72.5226	0.194141
4930539J05Rik	763.351	150.782	0.802473	940.216	1004.18	0.0637003	1734.67	1139.31	0.343214
4930539M17Rik	16.3242	20.995	0.222471	15.3477	12.1992	0.20515	27.3895	49.1282	0.442489
4930539N22Rik	4.66406	22.9036	0.796362	11.344	3.85237	0.660405	24.781	21.055	0.150359
4930540M03Rik	22.543	20.995	0.0686671	12.6786	8.34679	0.341662	10.4341	32.7522	0.681422
4930542C21Rik	17.1016	17.1777	0.00443431	19.3515	10.273	0.469138	15.6512	28.0733	0.442489
4930542D17Rik	13.9922	15.2691	0.083627	12.0113	10.915	0.0912681	27.3895	21.055	0.231278
4930542H20Rik	20.2109	17.1777	0.150077	20.6861	17.3356	0.161966	3.91279	7.01832	0.442489
4930543E12Rik	17.1016	17.1777	0.00443431	14.0132	14.1253	0.00794154	32.6066	18.7155	0.426021
4930544D05Rik	32.6484	36.2641	0.0997037	40.0376	49.4387	0.190156	29.9981	44.4494	0.325118
4930544G11Rik	12.4375	7.63455	0.386167	11.344	5.77855	0.490607	2.60853	23.3944	0.888498
4930544M13Rik	17.8789	13.3605	0.252725	18.6842	8.98885	0.518907	15.6512	14.0366	0.103157
4930544O15Rik	21.7656	17.1777	0.210786	14.6805	11.5571	0.212756	18.2597	28.0733	0.34957
4930545E07Rik	10.8828	15.2691	0.287265	11.344	7.70473	0.320809	3.91279	11.6972	0.665493
4930545H06Rik	14.7695	19.0864	0.226174	17.3496	10.273	0.407885	6.52132	25.7338	0.746586
4930545L23Rik	15.5469	5.72591	0.6317	14.6805	12.8412	0.125285	5.21706	4.67888	0.103157
4930546C10Rik	20.2109	13.3605	0.338949	10.6767	11.5571	0.0761784	27.3895	7.01832	0.743759
4930546K05Rik	17.1016	24.8123	0.310762	13.3459	17.3356	0.230149	0	16.3761	1
4930547C10Rik	17.8789	20.995	0.148421	12.6786	6.42061	0.493586	16.9554	4.67888	0.724048
4930547E08Rik	21.7656	15.2691	0.298477	18.0169	21.8301	0.174674	15.6512	25.7338	0.391806
4930547E14Rik	9.32812	3.81727	0.590778	16.015	8.98885	0.438724	0	23.3944	1
4930547N16Rik	144.586	57.2591	0.603979	188.844	257.466	0.266529	151.295	128.669	0.149546
4930548G14Rik	20.9883	13.3605	0.363432	20.0188	10.915	0.454761	18.2597	30.4127	0.399603
4930548H24Rik	29.5391	15.2691	0.483088	17.3496	16.0515	0.0748205	26.0853	25.7338	0.0134729
4930548J01Rik	15.5469	19.0864	0.185446	13.3459	4.49443	0.663235	10.4341	4.67888	0.551579
4930548K13Rik	16.3242	13.3605	0.181556	15.3477	6.42061	0.581658	6.52132	4.67888	0.282526
4930549C01Rik	17.1016	13.3605	0.218758	20.6861	22.4721	0.0794777	19.564	39.7705	0.508078
4930549G23Rik	117.379	28.6295	0.756093	141.466	217.017	0.348132	174.771	156.742	0.103157
4930550C14Rik	24.875	11.4518	0.539625	24.6899	14.1253	0.427889	7.82558	11.6972	0.330986
4930550L24Rik	5.4414	7.63455	0.287265	5.33835	2.56824	0.518907	7.82558	7.01832	0.103157
4930552N02Rik	15.5469	9.54318	0.386167	10.6767	3.2103	0.699317	6.52132	16.3761	0.601778
4930552P12Rik	22.543	34.3555	0.343832	22.0207	29.5348	0.254416	59.9962	14.0366	0.766041
4930553E22Rik	13.2148	9.54318	0.277843	8.67481	2.56824	0.703943	11.7384	28.0733	0.581867
4930554C24Rik	12.4375	13.3605	0.0690814	12.6786	7.70473	0.392303	16.9554	11.6972	0.310121
4930555B11Rik	54.414	45.8073	0.158172	104.098	157.947	0.340932	49.562	63.1649	0.215354
4930555G01Rik	13.2148	13.3605	0.010899	10.0094	4.49443	0.55098	9.12985	16.3761	0.442489
4930555I21Rik	62.1875	38.1727	0.386167	79.4079	137.401	0.422072	89.9942	116.972	0.230634
4930556C24Rik	14.7695	11.4518	0.224632	13.3459	10.915	0.182141	23.4768	18.7155	0.202806
4930556G01Rik	10.8828	7.63455	0.298477	14.6805	2.56824	0.825057	13.0426	2.33944	0.820631
4930556J02Rik	17.1016	19.0864	0.103991	16.6823	9.63091	0.422688	10.4341	23.3944	0.553991
4930556M19Rik	108.828	38.1727	0.649238	174.164	242.699	0.282389	258.244	266.696	0.0316909
4930556M19Rik	110.383	38.1727	0.654179	178.167	242.699	0.265892	258.244	266.696	0.0316909
4930556M19Rik	110.383	38.1727	0.654179	178.167	242.699	0.265892	263.461	262.017	0.00548128
4930556N09Rik	11.6602	17.1777	0.321205	12.6786	3.85237	0.696152	11.7384	9.35776	0.202806
4930557A04Rik	6.99609	1.90864	0.727185	5.33835	5.13649	0.0378133	3.91279	7.01832	0.442489
4930557J02Rik	16.3242	13.3605	0.181556	15.3477	10.273	0.330653	3.91279	7.01832	0.442489
4930558C23Rik	14.7695	30.5382	0.516359	20.6861	18.6198	0.0998899	9.12985	0	1
4930558G05Rik	12.4375	7.63455	0.386167	7.34023	1.92618	0.737585	14.3469	2.33944	0.836938
4930558J18Rik	121.266	47.7159	0.606517	168.158	200.965	0.163248	143.469	226.926	0.367771
4930558K02Rik	17.8789	15.2691	0.145971	273.59	353.133	0.22525	31.3023	28.0733	0.103157
4930558K02Rik	145.363	47.7159	0.671747	15.3477	14.1253	0.0796475	380.845	292.43	0.232155
4930562C15Rik	19.4336	17.1777	0.11608	10.6767	12.1992	0.124801	16.9554	23.3944	0.275235
4930562F07Rik	21.7656	13.3605	0.386167	24.6899	22.4721	0.0898234	13.0426	39.7705	0.672052
4930562F07Rik	21.7656	13.3605	0.386167	24.6899	22.4721	0.0898234	13.0426	37.431	0.651555
4930563D23Rik	16.3242	30.5382	0.465449	11.344	10.915	0.0378133	11.7384	9.35776	0.202806
4930563E18Rik	127.484	41.99	0.670626	142.801	166.936	0.144577	224.333	222.247	0.00930158
4930563E22Rik	119.711	36.2641	0.697069	215.536	202.891	0.0586656	160.424	168.44	0.0475848
4930563F08Rik	10.1055	15.2691	0.338175	14.0132	16.6936	0.160566	6.52132	35.0916	0.814163
4930563M20Rik	18.6562	9.54318	0.488472	15.3477	3.85237	0.748995	0	23.3944	1
4930564B18Rik	19.4336	20.995	0.0743707	12.0113	5.77855	0.518907	14.3469	23.3944	0.386738
4930564D02Rik	12.4375	13.3605	0.0690814	15.3477	10.915	0.288819	0	7.01832	1
4930564G21Rik	20.2109	11.4518	0.433385	9.34211	5.13649	0.450179	14.3469	4.67888	0.673875
4930564K09Rik	14.7695	20.995	0.296522	24.6899	12.8412	0.479899	10.4341	51.4677	0.797269
4930564K09Rik	82.3984	41.99	0.490403	191.513	151.526	0.208794	69.126	53.8071	0.221608
4930565A17	13.9922	15.2691	0.083627	14.6805	14.7674	0.00588759	36.5194	16.3761	0.551579
4930565D16Rik	17.1016	26.7209	0.359993	14.0132	7.06267	0.495997	16.9554	14.0366	0.172145
4930565N06Rik	14.7695	17.1777	0.140193	17.3496	8.34679	0.518907	0	2.33944	1
4930567H12Rik	13.9922	19.0864	0.266902	18.0169	7.70473	0.572361	14.3469	23.3944	0.386738
4930567H17Rik	5.4414	11.4518	0.524844	4.00376	7.70473	0.48035	10.4341	18.7155	0.442489
4930567J20Rik	5.4414	11.4518	0.524844	16.6823	6.42061	0.615125	18.2597	21.055	0.13276
4930567K20Rik	12.4375	15.2691	0.185446	13.3459	4.49443	0.663235	7.82558	23.3944	0.665493
4930568D16Rik	10.8828	19.0864	0.429812	15.3477	14.1253	0.0796475	41.7365	11.6972	0.719737
4930568E12Rik	16.3242	17.1777	0.0496873	15.3477	13.4833	0.121482	0	7.01832	1
4930568G15Rik	18.6562	22.9036	0.185446	14.0132	17.3356	0.191656	33.9109	7.01832	0.793036
4930568K20Rik	10.8828	22.9036	0.524844	14.6805	22.4721	0.346726	3.91279	18.7155	0.790933
4930570G19Rik	15.5469	11.4518	0.2634	5.33835	4.49443	0.158087	26.0853	37.431	0.303111
4930570G19Rik	15.5469	11.4518	0.2634	5.33835	4.49443	0.158087	26.0853	37.431	0.303111
4930570G19Rik	16.3242	11.4518	0.298477	6.00564	4.49443	0.251633	26.0853	37.431	0.303111
4930571K23Rik	13.9922	28.6295	0.511268	13.3459	4.49443	0.663235	0	23.3944	1
4930572J05Rik	40.4219	36.2641	0.102859	46.7105	48.7966	0.0427506	36.5194	74.8621	0.512178
4930572K03Rik	10.8828	15.2691	0.287265	10.0094	2.56824	0.743417	1.30426	11.6972	0.888498
4930572O13Rik	15.5469	41.99	0.629748	18.6842	10.915	0.415815	23.4768	9.35776	0.601403
4930573O16Rik	16.3242	19.0864	0.144719	8.00752	12.1992	0.3436	20.8682	2.33944	0.887895
4930578C19Rik	6.21875	19.0864	0.674179	4.67105	1.28412	0.72509	11.7384	2.33944	0.800702
4930578E11Rik	16.3242	28.6295	0.429812	5.33835	5.77855	0.0761784	23.4768	7.01832	0.701052
4930578I06Rik	20.2109	11.4518	0.433385	13.3459	3.85237	0.711344	5.21706	25.7338	0.797269
4930578M01Rik	88.6172	28.6295	0.67693	136.128	204.817	0.33537	121.297	42.1099	0.652835
4930578N16Rik	93.2812	38.1727	0.590778	158.816	196.471	0.191656	202.161	145.045	0.282526
4930578N18Rik	15.5469	19.0864	0.185446	9.34211	8.98885	0.0378133	19.564	7.01832	0.641263
4930579C15Rik	17.1016	7.63455	0.553576	12.6786	7.06267	0.442945	16.9554	4.67888	0.724048
4930579F01Rik	12.4375	19.0864	0.348357	21.3534	8.98885	0.579043	24.781	25.7338	0.0370259
4930579G18Rik	20.9883	20.995	0.000320397	22.0207	20.5459	0.0669705	24.781	18.7155	0.244764
4930579G22Rik	46.6406	41.99	0.0997115	64.0602	78.3314	0.182191	62.6047	102.935	0.391806
4930579G24Rik	216.879	82.0714	0.62158	267.585	339.008	0.210684	346.934	159.082	0.541464
4930579K19Rik	254.969	112.61	0.55834	391.701	368.543	0.0591224	340.413	229.265	0.326509
4930581F22Rik	97.9453	43.8986	0.551804	113.44	170.788	0.335786	469.535	367.292	0.217754
4930583H14Rik	23.3203	20.995	0.0997115	18.6842	26.9666	0.307134	31.3023	51.4677	0.391806
4930583K01Rik	374.68	97.3405	0.740203	559.192	633.072	0.116701	903.855	704.171	0.220924
4930583P06Rik	16.3242	9.54318	0.415397	13.3459	6.42061	0.518907	22.1725	14.0366	0.366935
4930584F24Rik	16.3242	19.0864	0.144719	7.34023	7.70473	0.0473089	13.0426	2.33944	0.820631
4930588N13Rik	16.3242	11.4518	0.298477	23.3553	16.6936	0.285233	2.60853	4.67888	0.442489
4930590J08Rik	19.4336	15.2691	0.214294	18.0169	25.6824	0.298473	14.3469	4.67888	0.673875
4930590L20Rik	13.2148	11.4518	0.133412	10.0094	4.49443	0.55098	11.7384	4.67888	0.601403
4930591A17Rik	12.4375	22.9036	0.456964	8.67481	1.92618	0.777957	11.7384	16.3761	0.2832
4930592A05Rik	12.4375	7.63455	0.386167	22.0207	6.42061	0.708428	18.2597	25.7338	0.29044
4930592I03Rik	66.8515	24.8123	0.628845	70.7331	81.5417	0.132553	86.0814	37.431	0.565167
4930593A02Rik	282.953	95.4318	0.662729	402.378	339.008	0.157488	695.173	559.126	0.195702
4930593C16Rik	14.7695	15.2691	0.0327174	16.6823	12.8412	0.230251	43.0407	4.67888	0.891292
4930594C11Rik	17.1016	32.4468	0.472936	14.0132	22.4721	0.37642	22.1725	30.4127	0.270947
4930595M18Rik	7.77344	3.81727	0.508934	2.00188	4.49443	0.554586	0	0	0
4930596D02Rik	13.9922	11.4518	0.181556	8.00752	3.2103	0.599089	3.91279	9.35776	0.581867
4930596M17Rik	17.8789	17.1777	0.0392179	17.3496	18.6198	0.0682144	27.3895	16.3761	0.402105
4930597G03Rik	10.8828	19.0864	0.429812	16.015	7.06267	0.558998	9.12985	7.01832	0.231278
4930598F16Rik	7.77344	19.0864	0.592723	11.344	6.42061	0.434008	14.3469	2.33944	0.836938
4930599N23Rik	179.566	62.985	0.649238	252.904	374.964	0.325523	414.756	388.347	0.0636736
4931402G19Rik	17.1016	30.5382	0.439994	16.015	8.98885	0.438724	41.7365	28.0733	0.327368
4931403E22Rik	12.4375	13.3605	0.0690814	14.0132	4.49443	0.679271	9.12985	14.0366	0.34957
4931403G20Rik	20.2109	13.3605	0.338949	16.6823	16.0515	0.0378133	14.3469	7.01832	0.510813
4931406B18Rik	17.1016	15.2691	0.107152	10.6767	5.13649	0.518907	10.4341	0	1
4931406C07Rik	122.82	30.5382	0.751359	361.673	360.838	0.00230825	350.847	304.127	0.133163
4931406C07Rik	257.301	62.985	0.755209	362.34	349.923	0.0342693	361.281	313.485	0.132297
4931406C07Rik	260.41	59.1677	0.77279	159.483	141.895	0.110279	238.68	119.311	0.50012
4931406H21Rik	17.1016	30.5382	0.439994	18.6842	19.9039	0.061278	11.7384	0	1
4931406P16Rik	12.4375	11.4518	0.0792504	18.0169	12.8412	0.287269	24.781	7.01832	0.716786
4931407G18Rik	24.0976	11.4518	0.524774	11.344	7.06267	0.377409	6.52132	18.7155	0.651555
4931408A02Rik	59.0781	20.995	0.644623	102.763	122.634	0.162031	105.645	100.596	0.0477966
4931408C20Rik	79.289	87.7973	0.0969078	68.0639	38.5237	0.434008	48.2578	133.348	0.638107
4931408D14Rik	30.3164	43.8986	0.3094	15.3477	29.5348	0.48035	18.2597	7.01832	0.615639
4931409K22Rik	13.9922	13.3605	0.0451486	12.0113	12.1992	0.0154006	22.1725	2.33944	0.894489
4931414P19Rik	48.1953	26.7209	0.44557	59.3891	83.4679	0.28848	97.8198	93.5776	0.0433677
4931417E11Rik	15.5469	11.4518	0.2634	13.3459	5.77855	0.567016	27.3895	0	1
4931417G12Rik	21.7656	19.0864	0.123096	22.0207	25.0404	0.120593	18.2597	35.0916	0.479656
4931419H13Rik	35.7578	30.5382	0.145971	23.3553	35.9554	0.350438	7.82558	42.1099	0.814163
4931420L22Rik	11.6602	9.54318	0.181556	10.6767	10.915	0.0218359	14.3469	23.3944	0.386738
4931423N10Rik	10.8828	19.0864	0.429812	12.0113	5.77855	0.518907	15.6512	0	1
4931428F04Rik	52.8594	36.2641	0.313951	62.7256	90.5306	0.307134	40.4322	49.1282	0.177007
4931428L18Rik	12.4375	20.995	0.407597	12.0113	4.49443	0.625816	11.7384	9.35776	0.202806
4931429I11Rik	9.32812	11.4518	0.185446	13.3459	10.273	0.230251	31.3023	39.7705	0.212925
4931429L15Rik	15.5469	15.2691	0.0178671	16.6823	7.70473	0.53815	18.2597	23.3944	0.219484
4931429P17Rik	16.3242	17.1777	0.0496873	7.34023	7.06267	0.0378133	13.0426	21.055	0.380543
4931430N09Rik	19.4336	41.99	0.537185	12.0113	8.98885	0.251633	28.6938	25.7338	0.103157
4931431B13Rik	22.543	22.9036	0.0157476	16.6823	16.0515	0.0378133	22.1725	9.35776	0.577956
4931431C16Rik	11.6602	17.1777	0.321205	14.0132	19.2618	0.27249	3.91279	30.4127	0.871344
4931431F19Rik	14.7695	13.3605	0.095404	12.6786	7.06267	0.442945	5.21706	16.3761	0.681422
4931440F15Rik	26.4297	19.0864	0.277843	38.703	31.461	0.187118	35.2151	21.055	0.402105
4931440J10Rik	415.101	143.148	0.65515	585.884	699.846	0.16284	1219.49	802.428	0.341996
4931440L10Rik	24.875	24.8123	0.00252132	20.6861	12.8412	0.379234	49.562	9.35776	0.811191
4931440P22Rik	146.918	43.8986	0.701203	231.551	234.994	0.0146534	404.322	233.944	0.421392
4932411E22Rik	21.7656	19.0864	0.123096	17.3496	10.915	0.370878	3.91279	7.01832	0.442489
4932411G14Rik	20.2109	19.0864	0.0556415	13.3459	11.5571	0.134032	36.5194	39.7705	0.0817461
4932411L15	17.1016	20.995	0.185446	14.6805	5.13649	0.650114	5.21706	18.7155	0.721244
4932411N23Rik	6.99609	5.72591	0.181556	4.67105	0.642061	0.862545	1.30426	0	1
4932412D23Rik	151.582	55.3505	0.634848	218.872	243.341	0.100554	263.461	226.926	0.138676
4932412D23Rik	174.125	62.985	0.638277	195.517	218.301	0.104369	236.072	187.155	0.207211
4932412H11Rik	12.4375	9.54318	0.232709	17.3496	2.56824	0.851971	3.91279	25.7338	0.847951
4932413F04Rik	13.2148	13.3605	0.010899	16.015	7.06267	0.558998	26.0853	9.35776	0.641263
4932414J04Rik	10.8828	7.63455	0.298477	14.0132	8.98885	0.358542	18.2597	23.3944	0.219484
4932414N04Rik	16.3242	11.4518	0.298477	11.344	9.63091	0.151012	33.9109	18.7155	0.448097
4932415G12Rik	297.723	66.8023	0.775622	373.684	459.074	0.186003	380.845	320.503	0.158442
4932415M13Rik	17.1016	11.4518	0.330364	8.67481	5.77855	0.333871	14.3469	18.7155	0.233422
4932416H05Rik	223.875	80.1627	0.641931	371.015	358.27	0.0343522	413.452	395.365	0.0437449
4932416K20Rik	14.7695	17.1777	0.140193	8.67481	12.1992	0.2889	14.3469	44.4494	0.67723
4932418E24Rik	19.4336	26.7209	0.27272	15.3477	17.9777	0.14629	2.60853	25.7338	0.898634
4932425I24Rik	33.4258	22.9036	0.314791	38.0357	39.1657	0.0288514	13.0426	25.7338	0.493172
4932429P05Rik	12.4375	7.63455	0.386167	9.34211	1.28412	0.862545	3.91279	14.0366	0.721244
4932435O22Rik	13.2148	22.9036	0.423024	15.3477	22.4721	0.317032	11.7384	18.7155	0.3728
4932438A13Rik	158.578	61.0764	0.61485	195.517	236.92	0.174757	319.545	217.568	0.319132
4932438H23Rik	17.8789	22.9036	0.219386	18.6842	30.1769	0.380843	20.8682	18.7155	0.103157
4932441B19Rik	17.8789	19.0864	0.0632632	16.6823	10.273	0.384201	41.7365	4.67888	0.887895
4932441J04Rik	16.3242	19.0864	0.144719	12.0113	11.5571	0.0378133	16.9554	18.7155	0.0940441
4932443I19Rik	17.8789	19.0864	0.0632632	14.6805	16.6936	0.120593	7.82558	21.055	0.628326
4932702P03Rik	22.543	28.6295	0.212598	15.3477	15.4095	0.0040048	23.4768	0	1
4933400A11Rik	4.66406	19.0864	0.755634	9.34211	5.13649	0.450179	3.91279	0	1
4933400B14Rik	17.8789	19.0864	0.0632632	11.344	2.56824	0.773603	7.82558	35.0916	0.776995
4933400C05Rik	38.0898	22.9036	0.398694	49.3797	71.9108	0.31332	15.6512	63.1649	0.752217
4933400C23	14.7695	13.3605	0.095404	17.3496	1.92618	0.888978	14.3469	14.0366	0.0216261
4933400F21Rik	16.3242	19.0864	0.144719	13.3459	8.34679	0.374579	11.7384	25.7338	0.543854
4933400L20Rik	13.9922	9.54318	0.317963	14.0132	7.06267	0.495997	14.3469	16.3761	0.123911
4933401B06Rik	6.21875	9.54318	0.348357	3.33647	0.642061	0.807563	3.91279	0	1
4933401D09Rik	16.3242	13.3605	0.181556	18.0169	24.3983	0.26155	18.2597	14.0366	0.231278
4933401H06Rik	13.2148	20.995	0.370572	19.3515	15.4095	0.203708	19.564	11.6972	0.402105
4933401P06Rik	17.8789	34.3555	0.479591	10.0094	7.06267	0.294396	14.3469	53.8071	0.733364
4933402C06Rik	11.6602	11.4518	0.0178671	10.0094	5.77855	0.422688	0	2.33944	1
4933402D24Rik	15.5469	20.995	0.259497	18.6842	6.42061	0.656362	13.0426	14.0366	0.0708145
4933402E13Rik	7.77344	9.54318	0.185446	5.33835	1.28412	0.759453	13.0426	2.33944	0.820631
4933402E13Rik	5.4414	1.90864	0.649238	6.67293	2.56824	0.615125	15.6512	2.33944	0.850526
4933402J07Rik	20.9883	15.2691	0.272494	13.3459	9.63091	0.27836	18.2597	0	1
4933402J10Rik	9.32812	13.3605	0.301811	10.0094	3.85237	0.615125	10.4341	0	1
4933402J15Rik	16.3242	9.54318	0.415397	10.6767	4.49443	0.579043	1.30426	30.4127	0.957115
4933402N03Rik	13.9922	17.1777	0.185446	10.6767	9.63091	0.09795	15.6512	2.33944	0.850526
4933402N22Rik	10.1055	9.54318	0.0556415	10.0094	1.28412	0.871708	15.6512	9.35776	0.402105
4933402P03Rik	13.9922	24.8123	0.436078	18.0169	17.3356	0.0378133	9.12985	18.7155	0.512178
4933403F05Rik	262.742	61.0764	0.767543	341.654	353.133	0.0325068	349.543	245.641	0.29725
4933403G14Rik	45.8633	36.2641	0.2093	48.7124	72.5529	0.328594	49.562	84.2198	0.411516
4933403O08Rik	7.77344	11.4518	0.321205	6.67293	1.92618	0.711344	2.60853	0	1
4933404G15Rik	10.1055	13.3605	0.243629	16.6823	6.42061	0.615125	6.52132	11.6972	0.442489
4933404K08Rik	16.3242	20.995	0.222471	6.00564	8.98885	0.331879	9.12985	4.67888	0.487518
4933404M02Rik	27.9844	19.0864	0.317963	36.7011	48.1546	0.237847	96.5155	70.1832	0.27283
4933404O12Rik	73.0703	32.4468	0.555951	90.7519	102.73	0.116596	198.248	119.311	0.398171
4933405D12Rik	139.144	26.7209	0.807963	180.169	302.411	0.404223	151.295	105.275	0.304174
4933405E24Rik	19.4336	13.3605	0.312507	10.6767	16.6936	0.360431	39.1279	14.0366	0.641263
4933405L10Rik	31.0937	30.5382	0.0178671	57.3872	64.2061	0.106203	40.4322	116.972	0.654343
4933405O20Rik	14.7695	5.72591	0.612316	15.3477	2.56824	0.832663	11.7384	18.7155	0.3728
4933406C10Rik	233.98	76.3455	0.67371	367.011	345.429	0.0588065	322.153	280.733	0.128574
4933406D12Rik	13.9922	22.9036	0.389085	18.6842	9.63091	0.484543	35.2151	11.6972	0.667836
4933406F09Rik	13.9922	13.3605	0.0451486	13.3459	5.77855	0.567016	22.1725	18.7155	0.155913
4933406G16Rik	10.8828	17.1777	0.366458	12.6786	8.34679	0.341662	13.0426	4.67888	0.641263
4933406I18Rik	118.934	61.0764	0.486466	102.763	129.054	0.203721	69.126	81.8804	0.155769
4933406I18Rik	118.934	61.0764	0.486466	102.763	129.054	0.203721	69.126	81.8804	0.155769
4933406J08Rik	20.9883	17.1777	0.181556	16.6823	14.7674	0.114788	7.82558	21.055	0.628326
4933406J10Rik	13.2148	11.4518	0.133412	16.6823	4.49443	0.730588	16.9554	25.7338	0.341123
4933406K04Rik	12.4375	19.0864	0.348357	12.0113	6.42061	0.465452	7.82558	0	1
4933406M09Rik	17.1016	20.995	0.185446	12.6786	8.34679	0.341662	26.0853	4.67888	0.820631
4933407C03Rik	26.4297	34.3555	0.230699	38.0357	51.3649	0.259499	36.5194	35.0916	0.039097
4933407C03Rik	308.605	78.2541	0.746427	352.998	351.207	0.00507349	798.21	704.171	0.117812
4933407E24Rik	13.9922	17.1777	0.185446	16.015	4.49443	0.719362	13.0426	28.0733	0.535407
4933407G14Rik	11.6602	38.1727	0.694542	14.6805	13.4833	0.0815491	52.1706	21.055	0.596421
4933407H18Rik	195.113	76.3455	0.608712	315.63	375.606	0.159678	310.415	313.485	0.00979333
4933407I05Rik	14.7695	15.2691	0.0327174	14.6805	3.85237	0.737585	5.21706	11.6972	0.553991
4933407K13Rik	38.8672	11.4518	0.70536	56.7199	66.1323	0.142326	33.9109	28.0733	0.172145
4933407L21Rik	13.2148	20.995	0.370572	11.344	19.9039	0.430062	16.9554	9.35776	0.448097
4933407P14Rik	15.5469	19.0864	0.185446	12.6786	13.4833	0.0596816	19.564	30.4127	0.356718
4933407P14Rik	15.5469	19.0864	0.185446	12.6786	13.4833	0.0596816	19.564	30.4127	0.356718
4933408B17Rik	13.2148	20.995	0.370572	26.6917	15.4095	0.422688	16.9554	7.01832	0.586073
4933408J17Rik	121.266	49.6245	0.590778	141.466	165.652	0.146002	163.033	107.614	0.339924
4933408N05Rik	13.9922	20.995	0.333547	12.6786	5.13649	0.594869	14.3469	18.7155	0.233422
4933409G03Rik	13.2148	17.1777	0.230699	12.0113	6.42061	0.465452	18.2597	23.3944	0.219484
4933409K07Rik	13.9922	11.4518	0.181556	6.67293	10.273	0.350438	7.82558	9.35776	0.163733
4933409K07Rik	10.1055	13.3605	0.243629	8.67481	8.34679	0.0378133	9.12985	9.35776	0.0243552
4933409K07Rik	10.1055	15.2691	0.338175	10.0094	7.70473	0.230251	13.0426	4.67888	0.641263
4933409K07Rik	6.21875	9.54318	0.348357	13.3459	4.49443	0.663235	14.3469	2.33944	0.836938
4933411E08Rik	17.1016	26.7209	0.359993	12.6786	7.70473	0.392303	13.0426	2.33944	0.820631
4933411G06Rik	17.1016	11.4518	0.330364	12.6786	14.1253	0.102423	18.2597	16.3761	0.103157
4933411G11Rik	73.0703	28.6295	0.608192	118.778	150.242	0.209422	109.558	149.724	0.268266
4933411K16Rik	20.2109	17.1777	0.150077	17.3496	10.915	0.370878	6.52132	28.0733	0.767704
4933411K20Rik	18.6562	20.995	0.111396	24.6899	37.8816	0.348236	10.4341	11.6972	0.107982
4933412E12Rik	193.559	55.3505	0.714038	230.884	267.097	0.135583	455.188	325.182	0.285609
4933412E24Rik	13.9922	15.2691	0.083627	18.0169	8.34679	0.536725	9.12985	35.0916	0.739828
4933412O06Rik	10.8828	9.54318	0.123096	10.0094	5.13649	0.486834	0	11.6972	1
4933413G19Rik	16.3242	22.9036	0.287265	17.3496	23.1142	0.249395	29.9981	44.4494	0.325118
4933413J09Rik	13.9922	17.1777	0.185446	8.67481	10.273	0.155569	7.82558	11.6972	0.330986
4933413L06Rik	11.6602	13.3605	0.127264	12.0113	2.56824	0.786181	14.3469	14.0366	0.0216261
4933415F23Rik	17.1016	19.0864	0.103991	8.67481	3.85237	0.555914	16.9554	9.35776	0.448097
4933416C03Rik	16.3242	15.2691	0.0646354	17.3496	10.273	0.407885	23.4768	14.0366	0.402105
4933416E03Rik	15.5469	15.2691	0.0178671	8.67481	6.42061	0.259856	16.9554	28.0733	0.396029
4933416I08Rik	10.1055	9.54318	0.0556415	6.00564	5.13649	0.144723	22.1725	2.33944	0.894489
4933416M06Rik	12.4375	15.2691	0.185446	18.0169	11.5571	0.358542	0	28.0733	1
4933416M07Rik	19.4336	17.1777	0.11608	20.0188	20.5459	0.0256569	3.91279	67.8438	0.942326
4933417A18Rik	13.2148	17.1777	0.230699	16.015	9.63091	0.398633	0	32.7522	1
4933417D19Rik	20.9883	28.6295	0.266902	27.359	44.3022	0.382445	19.564	37.431	0.477333
4933417E11Rik	13.9922	19.0864	0.266902	14.0132	5.77855	0.587634	16.9554	18.7155	0.0940441
4933417G07Rik	13.9922	9.54318	0.317963	15.3477	8.98885	0.414321	0	14.0366	1
4933417O13Rik	10.8828	22.9036	0.524844	27.359	9.63091	0.64798	11.7384	25.7338	0.543854
4933421E11Rik	16.3242	17.1777	0.0496873	22.0207	20.5459	0.0669705	83.4729	98.2565	0.150459
4933421E11Rik	89.3945	32.4468	0.637038	126.786	125.202	0.0124926	5.21706	18.7155	0.721244
4933421I07Rik	15.5469	15.2691	0.0178671	14.6805	4.49443	0.69385	19.564	0	1
4933421O10Rik	402.664	80.1627	0.800919	525.16	546.394	0.0388618	843.859	605.915	0.281971
4933422A05Rik	19.4336	20.995	0.0743707	17.3496	15.4095	0.111828	26.0853	25.7338	0.0134729
4933422H20Rik	17.1016	30.5382	0.439994	16.015	19.2618	0.168561	32.6066	11.6972	0.641263
4933424B01Rik	370.793	99.2491	0.732333	573.205	600.327	0.0451785	545.182	393.026	0.279093
4933424G05Rik	17.8789	9.54318	0.466232	11.344	10.273	0.0944125	2.60853	2.33944	0.103157
4933424G06Rik	15.5469	17.1777	0.0949403	14.6805	15.4095	0.0473089	31.3023	11.6972	0.626316
4933425B07Rik	13.9922	13.3605	0.0451486	9.34211	6.42061	0.312724	36.5194	9.35776	0.743759
4933425H06Rik	14.7695	26.7209	0.447267	17.3496	10.273	0.407885	52.1706	16.3761	0.686105
4933425L06Rik	11.6602	19.0864	0.389085	13.3459	8.34679	0.374579	6.52132	2.33944	0.641263
4933425O20Rik	17.1016	30.5382	0.439994	13.3459	17.3356	0.230149	5.21706	14.0366	0.628326
4933426D04Rik	18.6562	17.1777	0.0792504	17.3496	26.9666	0.356624	48.2578	21.055	0.563698
4933426M11Rik	161.687	40.0814	0.752106	200.855	215.09	0.0661818	609.091	414.081	0.320166
4933427D06Rik	10.1055	11.4518	0.117567	15.3477	5.13649	0.665326	5.21706	16.3761	0.681422
4933427D14Rik	20.9883	34.3555	0.389085	22.688	12.8412	0.434008	40.4322	18.7155	0.537113
4933427E11Rik	112.715	28.6295	0.746	186.175	266.455	0.30129	156.512	131.009	0.162947
4933427E13Rik	12.4375	7.63455	0.386167	17.3496	8.98885	0.481899	13.0426	14.0366	0.0708145
4933427G17Rik	152.359	51.5332	0.661765	293.609	305.621	0.0393031	871.248	423.439	0.513986
4933427I22Rik	12.4375	17.1777	0.275952	10.0094	7.70473	0.230251	24.781	30.4127	0.185176
4933427I22Rik	22.543	11.4518	0.492	13.3459	8.34679	0.374579	13.0426	16.3761	0.203555
4933428C19Rik	6.99609	15.2691	0.541814	16.015	5.13649	0.679271	7.82558	9.35776	0.163733
4933429K18Rik	15.5469	9.54318	0.386167	14.6805	16.0515	0.0854166	11.7384	7.01832	0.402105
4933429O19Rik	11.6602	7.63455	0.345245	14.0132	7.06267	0.495997	19.564	21.055	0.0708145
4933430H15Rik	27.207	28.6295	0.0496873	18.6842	34.6713	0.461104	57.3876	49.1282	0.143923
4933430H16Rik	19.4336	17.1777	0.11608	10.6767	3.85237	0.63918	19.564	9.35776	0.521684
4933430I17Rik	118.156	45.8073	0.612316	123.449	199.681	0.381767	223.029	161.421	0.276232
4933430M04Rik	20.2109	13.3605	0.338949	14.6805	7.70473	0.475171	20.8682	42.1099	0.504434
4933430N04Rik	17.1016	15.2691	0.107152	10.0094	5.13649	0.486834	2.60853	21.055	0.876109
4933431E20Rik	36.5351	47.7159	0.234319	52.7162	109.15	0.517031	46.9535	44.4494	0.0533326
4933431G14Rik	12.4375	15.2691	0.185446	15.3477	10.273	0.330653	15.6512	25.7338	0.391806
4933431G14Rik	12.4375	15.2691	0.185446	15.3477	8.34679	0.456155	18.2597	25.7338	0.29044
4933432B09Rik	124.375	43.8986	0.647046	185.508	234.352	0.208424	155.207	112.293	0.276497
4933432G23Rik	13.9922	15.2691	0.083627	13.3459	7.06267	0.470797	5.21706	0	1
4933432I03Rik	21.7656	19.0864	0.123096	12.0113	15.4095	0.220525	5.21706	25.7338	0.797269
4933432I09Rik	16.3242	15.2691	0.0646354	19.3515	17.3356	0.104171	10.4341	9.35776	0.103157
4933432I09Rik	17.1016	13.3605	0.218758	20.6861	13.4833	0.348196	18.2597	4.67888	0.743759
4933433C11Rik	21.7656	15.2691	0.298477	16.015	16.0515	0.00227264	24.781	42.1099	0.411516
4933433F19Rik	13.2148	13.3605	0.010899	15.3477	5.77855	0.623492	1.30426	16.3761	0.920356
4933433G15Rik	624.984	114.518	0.816766	975.583	695.994	0.286587	1636.85	762.657	0.534071
4933433G19Rik	17.8789	19.0864	0.0632632	14.6805	7.70473	0.475171	20.8682	2.33944	0.887895
4933433H22Rik	19.4336	22.9036	0.151507	12.6786	10.915	0.139096	14.3469	25.7338	0.442489
4933433P14Rik	389.449	99.2491	0.745155	489.793	429.539	0.123021	918.202	542.75	0.408899
4933434E20Rik	386.34	104.975	0.728283	494.464	579.781	0.147153	704.303	470.227	0.33235
4933434E20Rik	386.34	104.975	0.728283	494.464	579.781	0.147153	704.303	470.227	0.33235
4933434I20Rik	12.4375	20.995	0.407597	12.6786	10.273	0.189738	14.3469	23.3944	0.386738
4933436C20Rik	33.4258	41.99	0.203959	37.3684	47.5125	0.213503	45.6492	44.4494	0.026285
4933436E23Rik	13.2148	13.3605	0.010899	8.00752	7.06267	0.117996	19.564	30.4127	0.356718
4933436H12Rik	17.1016	22.9036	0.253326	16.6823	5.77855	0.653613	23.4768	7.01832	0.701052
4933436I01Rik	8.55078	3.81727	0.553576	4.67105	1.28412	0.72509	0	18.7155	1
4933437F05Rik	20.2109	20.995	0.0373456	16.015	8.98885	0.438724	10.4341	32.7522	0.681422
4933438B17Rik	20.2109	20.995	0.0373456	20.6861	3.2103	0.844809	6.52132	9.35776	0.303111
4933438K21Rik	16.3242	22.9036	0.287265	10.0094	8.98885	0.101959	2.60853	18.7155	0.860622
4933439C10Rik	97.1679	28.6295	0.70536	120.78	117.497	0.0271814	99.1241	116.972	0.152583
4933439F18Rik	128.262	62.985	0.508934	184.173	206.744	0.109172	181.293	180.137	0.00637563
4933439K11Rik	41.1992	22.9036	0.444076	50.047	89.8885	0.443232	40.4322	32.7522	0.189948
4933440J02Rik	31.8711	24.8123	0.22148	40.7049	62.922	0.353089	89.9942	67.8438	0.246132
4933440M02Rik	20.2109	26.7209	0.243629	14.0132	8.98885	0.358542	24.781	7.01832	0.716786
5031410I06Rik	22.543	22.9036	0.0157476	15.3477	9.63091	0.372487	18.2597	16.3761	0.103157
5031414D18Rik	24.875	30.5382	0.185446	37.3684	39.8078	0.061278	15.6512	11.6972	0.252631
5031425E22Rik	779.676	177.503	0.772337	1093.03	1106.27	0.011972	1476.43	1087.84	0.263195
5031425F14Rik	13.9922	9.54318	0.317963	12.0113	16.0515	0.251704	32.6066	21.055	0.354273
5031426D15Rik	14.7695	19.0864	0.226174	14.0132	5.13649	0.633453	6.52132	11.6972	0.442489
5031434C07Rik	16.3242	22.9036	0.287265	11.344	10.273	0.0944125	9.12985	16.3761	0.442489
5031434O11Rik	93.2812	28.6295	0.693083	142.801	168.862	0.154334	122.601	98.2565	0.198566
5031439G07Rik	94.8359	57.2591	0.39623	150.808	171.43	0.120293	220.421	194.173	0.119078
5033403H07Rik	22.543	19.0864	0.153334	34.6993	18.6198	0.463396	20.8682	4.67888	0.775789
5033404E19Rik	19.4336	20.995	0.0743707	23.3553	21.188	0.0927954	20.8682	46.7888	0.553991
5033406O09Rik	45.8633	36.2641	0.2093	88.75	121.35	0.268641	83.4729	138.027	0.395242
5033411D12Rik	488.172	110.701	0.773234	700.658	776.894	0.0981287	614.308	442.154	0.280241
5033414D02Rik	67.6289	36.2641	0.463778	86.0809	105.298	0.182502	62.6047	88.8987	0.295775
5133401N09Rik	66.8515	38.1727	0.428993	76.0715	93.0988	0.182896	87.3857	91.2381	0.0422241
5330411J11Rik	17.8789	28.6295	0.375509	20.0188	11.5571	0.422688	2.60853	7.01832	0.628326
5330413P13Rik	19.4336	17.1777	0.11608	14.6805	21.8301	0.327512	22.1725	11.6972	0.472445
5330417C22Rik	35.7578	17.1777	0.519609	38.0357	37.8816	0.00405236	13.0426	72.5226	0.820158
5330426P16Rik	27.9844	38.1727	0.266902	34.6993	31.461	0.0933241	36.5194	28.0733	0.231278
5330434G04Rik	6.99609	11.4518	0.389085	5.33835	8.34679	0.360431	7.82558	7.01832	0.103157
5330437I02Rik	17.1016	24.8123	0.310762	20.6861	11.5571	0.441311	16.9554	2.33944	0.862024
5330439B14Rik	17.1016	11.4518	0.330364	13.3459	11.5571	0.134032	10.4341	25.7338	0.594537
5430401F13Rik	13.2148	3.81727	0.711137	17.3496	8.98885	0.481899	28.6938	4.67888	0.836938
5430402E10Rik	8.55078	5.72591	0.330364	6.00564	3.2103	0.465452	5.21706	4.67888	0.103157
5430402O13Rik	385.562	83.98	0.782188	450.423	444.306	0.0135804	532.14	467.888	0.120742
5430403N17	21.7656	15.2691	0.298477	18.0169	13.4833	0.251633	11.7384	4.67888	0.601403
5430405G05Rik	33.4258	17.1777	0.486093	26.6917	46.2284	0.422611	89.9942	63.1649	0.298123
5430405H02Rik	364.574	83.98	0.769649	528.496	541.899	0.0247333	598.657	376.65	0.370842
5430407P10Rik	79.289	47.7159	0.398203	81.4098	86.0362	0.0537722	112.167	49.1282	0.562007
5430411K18Rik	132.926	53.4418	0.597957	216.87	246.551	0.120385	219.116	114.633	0.476842
5430416N02Rik	203.664	55.3505	0.728227	308.29	319.746	0.0358307	230.855	217.568	0.057555
5430416O09Rik	15.5469	15.2691	0.0178671	12.0113	8.34679	0.305087	13.0426	16.3761	0.203555
5430417L22Rik	143.031	43.8986	0.693083	142.801	224.721	0.364543	340.413	226.926	0.333381
5430419D17Rik	13.9922	19.0864	0.266902	10.6767	9.63091	0.09795	2.60853	44.4494	0.941315
5430421F17Rik	13.9922	20.995	0.333547	14.0132	8.98885	0.358542	13.0426	7.01832	0.461894
5430421N21Rik	28.7617	22.9036	0.203676	19.3515	31.461	0.384904	24.781	23.3944	0.055955
5430425J12Rik	185.785	83.98	0.547972	533.835	346.071	0.351727	1013.41	334.54	0.669888
5430427M07Rik	13.2148	17.1777	0.230699	17.3496	16.0515	0.0748205	26.0853	42.1099	0.380543
5430427O19Rik	6.99609	7.63455	0.083627	8.67481	9.63091	0.0992739	18.2597	0	1
5430428K19Rik	5.4414	7.63455	0.287265	3.33647	3.2103	0.0378133	5.21706	4.67888	0.103157
5430434I15Rik	18.6562	19.0864	0.0225355	7.34023	1.92618	0.737585	0	25.7338	1
5430435G22Rik	17.8789	38.1727	0.531632	11.344	10.273	0.0944125	32.6066	2.33944	0.928253
5430437J10Rik	25.6523	22.9036	0.107152	27.359	37.8816	0.277775	14.3469	35.0916	0.591158
5430437P03Rik	61.4101	41.99	0.316237	91.4192	128.412	0.28808	101.733	86.5593	0.149149
5430440P10Rik	33.4258	13.3605	0.600295	54.7181	54.5752	0.00261135	40.4322	25.7338	0.363531
5530400C23Rik	18.6562	11.4518	0.386167	18.0169	12.1992	0.322906	7.82558	28.0733	0.721244
5530401A14Rik	17.1016	19.0864	0.103991	9.34211	5.13649	0.450179	18.2597	9.35776	0.487518
5530601H04Rik	24.0976	5.72591	0.762387	40.7049	59.0696	0.310899	35.2151	18.7155	0.468538
5730403B10Rik	287.617	82.0714	0.714651	384.361	475.767	0.192124	533.444	400.044	0.250073
5730403I07Rik	18.6562	11.4518	0.386167	19.3515	10.273	0.469138	7.82558	16.3761	0.522133
5730405O15Rik	55.9687	3.81727	0.931796	91.4192	110.434	0.172186	88.69	28.0733	0.683467
5730408K05Rik	178.789	53.4418	0.70109	284.934	303.695	0.0617742	255.636	128.669	0.49667
5730409E04Rik	42.7539	13.3605	0.687503	33.3647	62.922	0.469745	54.7791	21.055	0.615639
5730412P04Rik	3.88672	9.54318	0.592723	8.67481	6.42061	0.259856	0	16.3761	1
5730412P04Rik	3.10937	9.54318	0.674179	9.34211	7.06267	0.243996	0	16.3761	1
5730416F02Rik	7.77344	9.54318	0.185446	8.00752	4.49443	0.438724	9.12985	14.0366	0.34957
5730419I09Rik	185.785	51.5332	0.722619	191.513	191.976	0.00241167	320.849	170.779	0.467727
5730420D15Rik	198.223	61.0764	0.69188	194.85	234.352	0.168561	613.004	437.475	0.286342
5730422E09Rik	32.6484	17.1777	0.473857	37.3684	55.2172	0.323247	33.9109	37.431	0.0940441
5730435O14Rik	11.6602	13.3605	0.127264	17.3496	16.0515	0.0748205	24.781	2.33944	0.905595
5730437N04Rik	155.469	34.3555	0.77902	238.224	283.791	0.160566	134.339	119.311	0.111864
5730455O13Rik	86.2851	30.5382	0.646078	122.782	154.095	0.203204	112.167	88.8987	0.207441
5730455P16Rik	100.277	43.8986	0.562228	138.13	170.146	0.18817	127.818	135.688	0.0579981
5730457N03Rik	21.7656	22.9036	0.0496873	15.3477	8.34679	0.456155	35.2151	44.4494	0.207747
5730460C07Rik	13.9922	17.1777	0.185446	20.6861	13.4833	0.348196	22.1725	7.01832	0.683467
5730469M10Rik	74.625	34.3555	0.539625	121.447	186.84	0.349991	159.12	60.8254	0.617739
5730480H06Rik	10.8828	15.2691	0.287265	8.67481	6.42061	0.259856	3.91279	23.3944	0.832747
5730494M16Rik	10.1055	13.3605	0.243629	145.47	176.567	0.176119	133.035	145.045	0.082804
5730494M16Rik	117.379	43.8986	0.626009	145.47	176.567	0.176119	133.035	145.045	0.082804
5730494M16Rik	117.379	43.8986	0.626009	16.015	15.4095	0.0378133	10.4341	9.35776	0.103157
5730494N06Rik	105.719	24.8123	0.765299	146.805	176.567	0.168561	131.731	133.348	0.0121291
5730507C01Rik	44.3086	20.995	0.526164	34.6993	28.8927	0.167338	103.037	44.4494	0.568607
5730508B09Rik	113.492	45.8073	0.596384	114.107	136.759	0.165633	125.209	128.669	0.0268893
5730522E02Rik	90.1718	30.5382	0.661333	117.444	151.526	0.224929	91.2985	149.724	0.390222
5730528L13Rik	27.9844	26.7209	0.0451486	54.0508	53.2911	0.0140556	88.69	126.33	0.297949
5730528L13Rik	36.5351	28.6295	0.216383	40.0376	33.3872	0.166105	86.0814	81.8804	0.0488031
5730528L13Rik	59.0781	24.8123	0.580009	39.3703	28.2507	0.282437	66.5175	44.4494	0.331764
5730559C18Rik	76.1797	36.2641	0.523966	106.767	139.969	0.237211	133.035	154.403	0.138392
5730577I03Rik	196.668	49.6245	0.747673	289.605	283.149	0.0222942	179.988	210.55	0.145149
5730590G19Rik	115.047	61.0764	0.469117	106.1	125.202	0.152571	118.688	126.33	0.0604902
5830403L16Rik	12.4375	24.8123	0.498736	14.0132	7.70473	0.450179	15.6512	18.7155	0.163733
5830403M04Rik	19.4336	17.1777	0.11608	12.6786	19.9039	0.36301	1.30426	4.67888	0.721244
5830411N06Rik	17.1016	19.0864	0.103991	15.3477	7.06267	0.539824	10.4341	16.3761	0.362844
5830411N06Rik	17.1016	19.0864	0.103991	15.3477	7.06267	0.539824	10.4341	16.3761	0.362844
5830411N06Rik	16.3242	19.0864	0.144719	16.015	7.06267	0.558998	10.4341	16.3761	0.362844
5830415F09Rik	227.762	49.6245	0.782121	299.615	332.588	0.0991401	241.289	177.797	0.263135
5830416I19Rik	20.2109	30.5382	0.338175	12.6786	14.7674	0.141448	1.30426	23.3944	0.944249
5830416P10Rik	15.5469	22.9036	0.321205	20.0188	17.9777	0.101959	16.9554	11.6972	0.310121
5830417I10Rik	59.8555	24.8123	0.585463	78.7406	100.161	0.213863	49.562	81.8804	0.394702
5830418K08Rik	118.156	28.6295	0.757697	156.814	173.998	0.0987626	134.339	116.972	0.129279
5830418P13Rik	7.77344	11.4518	0.321205	13.3459	9.63091	0.27836	24.781	14.0366	0.433573
5830428M24Rik	25.6523	19.0864	0.25596	24.0226	17.9777	0.251633	41.7365	9.35776	0.775789
5830432E09Rik	20.9883	24.8123	0.154117	23.3553	21.8301	0.0653043	31.3023	39.7705	0.212925
5830433M19Rik	125.93	40.0814	0.681716	209.53	220.227	0.0485715	239.985	154.403	0.356613
5830473C10Rik	8.55078	13.3605	0.359993	12.0113	8.98885	0.251633	18.2597	2.33944	0.87188
5930403L14Rik	56.7461	41.99	0.260037	82.0771	125.844	0.347787	92.6028	100.596	0.0794581
5930412G12Rik	23.3203	19.0864	0.181556	24.6899	14.1253	0.427889	27.3895	74.8621	0.634133
5930416I19Rik	225.43	83.98	0.627467	296.278	378.174	0.216555	367.802	388.347	0.0529025
5930416I19Rik	223.098	82.0714	0.632128	287.603	366.617	0.21552	361.281	371.971	0.0287381
5930434B04Rik	205.996	41.99	0.796161	278.929	269.024	0.0355114	221.725	252.659	0.122436
5930434B04Rik	205.996	41.99	0.796161	278.929	269.024	0.0355114	221.725	252.659	0.122436
5930434B04Rik	205.996	41.99	0.796161	278.929	269.024	0.0355114	221.725	252.659	0.122436
5930438M14	12.4375	17.1777	0.275952	12.6786	10.915	0.139096	27.3895	18.7155	0.316691
6030405A18Rik	15.5469	22.9036	0.321205	10.6767	7.06267	0.338497	27.3895	23.3944	0.145864
6030407O03Rik	15.5469	17.1777	0.0949403	11.344	11.5571	0.0184395	14.3469	25.7338	0.442489
6030408B16Rik	17.1016	26.7209	0.359993	16.6823	15.4095	0.0763008	6.52132	18.7155	0.651555
6030419C18Rik	22.543	26.7209	0.156355	28.6936	26.9666	0.0601897	29.9981	23.3944	0.220137
6030422M02Rik	12.4375	11.4518	0.0792504	11.344	16.6936	0.320458	7.82558	4.67888	0.402105
6030429G01Rik	20.2109	11.4518	0.433385	29.3609	19.9039	0.322096	33.9109	23.3944	0.310121
6030440G07Rik	30.3164	17.1777	0.433385	28.6936	33.3872	0.140579	16.9554	65.5043	0.741155
6030446N20Rik	107.273	45.8073	0.572986	161.485	168.22	0.0400365	144.773	121.651	0.159715
6030458C11Rik	195.113	53.4418	0.726098	280.263	254.256	0.0927954	194.335	212.889	0.0871518
6030458C11Rik	195.113	53.4418	0.726098	280.263	254.256	0.0927954	194.335	212.889	0.0871518
6030466F02Rik	20.2109	26.7209	0.243629	24.6899	25.0404	0.0139981	27.3895	21.055	0.231278
6030468B19Rik	21.7656	19.0864	0.123096	15.3477	23.1142	0.336003	29.9981	37.431	0.198577
6030498E09Rik	5.4414	7.63455	0.287265	3.33647	3.2103	0.0378133	3.91279	4.67888	0.163733
6230400D17Rik	130.594	41.99	0.678468	213.534	211.88	0.00774497	238.68	159.082	0.333494
6230409E13Rik	26.4297	20.995	0.205628	16.015	28.2507	0.433109	22.1725	32.7522	0.323022
6230427J02Rik	30.3164	19.0864	0.370428	37.3684	47.5125	0.213503	41.7365	35.0916	0.15921
6330403A02Rik	17.1016	20.995	0.185446	22.0207	30.1769	0.270279	18.2597	14.0366	0.231278
6330403K07Rik	18.6562	13.3605	0.283861	14.6805	9.63091	0.343964	22.1725	11.6972	0.472445
6330406I15Rik	25.6523	17.1777	0.330364	20.0188	15.4095	0.230251	29.9981	7.01832	0.766041
6330407A03Rik	19.4336	17.1777	0.11608	9.34211	12.8412	0.27249	15.6512	21.055	0.256652
6330407J23Rik	17.1016	19.0864	0.103991	15.3477	8.34679	0.456155	10.4341	2.33944	0.775789
6330408A02Rik	87.8398	34.3555	0.608885	120.78	126.486	0.0451108	129.122	170.779	0.243923
6330409D20Rik	24.875	20.995	0.15598	17.3496	14.1253	0.185842	27.3895	21.055	0.231278
6330409N04Rik	171.793	66.8023	0.611146	202.19	273.518	0.26078	256.94	217.568	0.153235
6330410L21Rik	20.2109	20.995	0.0373456	14.6805	15.4095	0.0473089	29.9981	28.0733	0.0641641
6330415B21Rik	13.2148	11.4518	0.133412	12.6786	2.56824	0.797434	5.21706	2.33944	0.551579
6330416G13Rik	122.043	51.5332	0.577745	121.447	177.851	0.317139	179.988	133.348	0.25913
6330418K02Rik	178.012	80.1627	0.549677	250.902	280.581	0.105774	449.971	374.31	0.168146
6330439K17Rik	97.9453	32.4468	0.668725	172.162	223.437	0.229485	109.558	100.596	0.0818038
6330503K22Rik	29.5391	24.8123	0.160018	43.3741	52.0069	0.165994	46.9535	65.5043	0.2832
6330512M04Rik	15.5469	15.2691	0.0178671	16.6823	12.1992	0.268738	2.60853	4.67888	0.442489
6330527O06Rik	10.8828	13.3605	0.185446	10.0094	10.273	0.0256569	0	7.01832	1
6330545A04Rik	27.9844	20.995	0.24976	32.6974	56.5014	0.421299	24.781	49.1282	0.495585
6330549D23Rik	196.668	34.3555	0.825312	281.598	337.082	0.164601	268.678	119.311	0.555932
6330578E17Rik	251.082	78.2541	0.688332	367.679	403.214	0.0881307	438.233	257.338	0.412782
6430411K18Rik	10.8828	17.1777	0.366458	13.3459	5.77855	0.567016	6.52132	23.3944	0.721244
6430527G18Rik	171.793	49.6245	0.711137	215.536	248.478	0.132574	253.027	236.283	0.066174
6430531B16Rik	32.6484	28.6295	0.123096	26.0244	23.1142	0.111828	28.6938	30.4127	0.0565193
6430548G04	12.4375	20.995	0.407597	11.344	11.5571	0.0184395	22.1725	30.4127	0.270947
6430548M08Rik	13.9922	19.0864	0.266902	164.821	221.511	0.255922	23.4768	18.7155	0.202806
6430548M08Rik	111.16	55.3505	0.502066	164.821	221.511	0.255922	193.031	177.797	0.0789182
6430548M08Rik	111.16	55.3505	0.502066	14.6805	9.63091	0.343964	193.031	177.797	0.0789182
6430550D23Rik	13.9922	17.1777	0.185446	187.509	201.607	0.0699264	170.859	156.742	0.0826188
6430550D23Rik	129.816	51.5332	0.60303	19.3515	11.5571	0.402781	53.4748	0	1
6430562O15Rik	20.9883	26.7209	0.214537	21.3534	16.6936	0.218223	11.7384	23.3944	0.49824
6430571L13Rik	46.6406	26.7209	0.427089	48.7124	64.2061	0.241311	49.562	72.5226	0.316599
6430573F11Rik	14.7695	24.8123	0.404749	13.3459	10.915	0.182141	18.2597	11.6972	0.359398
6430584L05	10.1055	13.3605	0.243629	15.3477	12.8412	0.163316	28.6938	11.6972	0.592344
6430598A04Rik	62.1875	53.4418	0.140634	96.0903	165.652	0.419926	138.252	170.779	0.190463
6430704M03Rik	18.6562	30.5382	0.389085	16.6823	25.6824	0.350438	37.8237	21.055	0.443339
6430706D22Rik	66.8515	76.3455	0.124355	56.7199	60.9958	0.0701006	58.6919	56.1466	0.0433677
6530401N04Rik	86.2851	36.2641	0.579718	134.793	169.504	0.204779	169.554	67.8438	0.59987
6530402F18Rik	22.543	19.0864	0.153334	26.6917	30.8189	0.133917	61.3004	11.6972	0.809182
6530411M01Rik	13.9922	15.2691	0.083627	10.0094	12.1992	0.179501	13.0426	23.3944	0.442489
6530418L21Rik	31.0937	30.5382	0.0178671	38.703	47.5125	0.185414	53.4748	23.3944	0.562516
6530418L21Rik	34.2031	19.0864	0.44197	34.6993	29.5348	0.148835	35.2151	2.33944	0.933567
6530439I21	123.598	59.1677	0.521287	209.53	252.972	0.171726	279.113	287.751	0.030021
6720401G13Rik	87.8398	9.54318	0.891357	104.765	128.412	0.18415	86.0814	51.4677	0.402105
6720401G13Rik	87.8398	9.54318	0.891357	104.765	128.412	0.18415	86.0814	51.4677	0.402105
6720456B07Rik	111.937	45.8073	0.590778	132.791	188.766	0.296529	198.248	205.871	0.0370259
6720456H20Rik	216.101	55.3505	0.743868	310.291	358.27	0.133917	359.977	224.586	0.376109
6720463M24Rik	200.555	62.985	0.685946	255.573	292.138	0.125161	328.675	294.769	0.103157
6720468P15Rik	17.1016	28.6295	0.402661	11.344	6.42061	0.434008	33.9109	16.3761	0.517085
6720468P15Rik	15.5469	30.5382	0.490904	12.0113	4.49443	0.625816	33.9109	16.3761	0.517085
6720483E21Rik	59.0781	22.9036	0.612316	66.0621	73.1949	0.0974506	127.818	60.8254	0.524124
6720489N17Rik	29.5391	28.6295	0.0307899	54.0508	62.2799	0.132131	29.9981	65.5043	0.542044
6820408C15Rik	34.9805	26.7209	0.236119	38.703	32.103	0.170529	16.9554	49.1282	0.654874
6820431F20Rik	346.695	124.061	0.64216	465.771	469.346	0.00761842	755.169	676.098	0.104706
7420426K07Rik	14.7695	22.9036	0.355145	14.6805	12.8412	0.125285	29.9981	23.3944	0.220137
7420461P10Rik	13.2148	19.0864	0.307629	15.3477	9.63091	0.372487	23.4768	14.0366	0.402105
7420700N18Rik	15.5469	3.81727	0.754467	7.34023	4.49443	0.387699	15.6512	14.0366	0.103157
7420701I03Rik	15.5469	13.3605	0.140634	10.6767	7.70473	0.27836	3.91279	4.67888	0.163733
7530416G11Rik	13.9922	22.9036	0.389085	13.3459	3.85237	0.711344	26.0853	23.3944	0.103157
7530420F21Rik	12.4375	9.54318	0.232709	14.0132	10.915	0.221087	27.3895	7.01832	0.743759
7630403G23Rik	13.2148	13.3605	0.010899	10.0094	7.70473	0.230251	3.91279	11.6972	0.665493
8030411F24Rik	21.7656	34.3555	0.366458	8.67481	5.77855	0.333871	14.3469	21.055	0.318597
8030423F21Rik	19.4336	26.7209	0.27272	22.0207	19.9039	0.0961276	32.6066	9.35776	0.71301
8030423J24Rik	12.4375	11.4518	0.0792504	17.3496	6.42061	0.629928	10.4341	7.01832	0.327368
8030442B05Rik	58.3008	26.7209	0.541671	62.7256	96.3091	0.348706	33.9109	39.7705	0.147336
8030443G20Rik	21.7656	22.9036	0.0496873	15.3477	14.7674	0.0378133	10.4341	14.0366	0.256652
8030462N17Rik	258.855	80.1627	0.690318	304.286	349.281	0.128823	533.444	386.008	0.276386
8430403D17Rik	18.6562	17.1777	0.0792504	20.0188	7.06267	0.647198	14.3469	14.0366	0.0216261
8430406I07Rik	339.699	108.792	0.679739	479.117	493.745	0.0296269	628.655	327.522	0.479012
8430408G22Rik	17.1016	26.7209	0.359993	18.6842	26.3245	0.290235	20.8682	32.7522	0.362844
8430410A17Rik	86.2851	51.5332	0.402757	128.788	143.18	0.100517	191.727	159.082	0.170268
8430410K20Rik	13.9922	9.54318	0.317963	15.3477	13.4833	0.121482	26.0853	14.0366	0.461894
8430419L09Rik	146.918	61.0764	0.584282	128.788	177.851	0.275867	190.423	128.669	0.324297
8430422H06Rik	14.7695	5.72591	0.612316	11.344	7.06267	0.377409	2.60853	7.01832	0.628326
8430423G03Rik	17.8789	13.3605	0.252725	17.3496	11.5571	0.333871	7.82558	16.3761	0.522133
8430427H17Rik	23.3203	28.6295	0.185446	276.927	393.583	0.296396	35.2151	51.4677	0.315782
8430427H17Rik	237.09	101.158	0.573336	34.032	47.5125	0.283726	483.882	495.961	0.0243552
8430429K09Rik	254.191	64.8936	0.744706	336.983	404.498	0.166911	412.147	425.778	0.0320133
8430429K09Rik	254.969	64.8936	0.745484	337.65	404.498	0.165261	414.756	425.778	0.0258868
8430429K09Rik	252.637	61.0764	0.758244	335.649	401.93	0.164908	412.147	421.099	0.0212579
8430431K14Rik	19.4336	13.3605	0.312507	12.6786	4.49443	0.64551	16.9554	11.6972	0.310121
8430436N08Rik	13.9922	19.0864	0.266902	12.0113	3.2103	0.732726	7.82558	16.3761	0.522133
8430437L04Rik	14.7695	20.995	0.296522	12.6786	7.70473	0.392303	10.4341	4.67888	0.551579
9030025P20Rik	141.477	40.0814	0.716692	265.583	284.433	0.0662728	118.688	98.2565	0.172145
9030204H09Rik	13.9922	30.5382	0.541814	18.0169	30.1769	0.402956	28.6938	30.4127	0.0565193
9030224M15Rik	39.6445	30.5382	0.2297	40.0376	38.5237	0.0378133	29.9981	46.7888	0.358862
9030404E10Rik	25.6523	32.4468	0.209404	25.3572	34.0292	0.254842	37.8237	44.4494	0.149062
9030418K01Rik	34.2031	19.0864	0.44197	34.6993	50.7228	0.315904	31.3023	49.1282	0.362844
9030425E11Rik	10.1055	15.2691	0.338175	15.3477	5.77855	0.623492	27.3895	9.35776	0.658346
9030612E09Rik	28.7617	26.7209	0.0709554	40.0376	64.8481	0.382594	54.7791	49.1282	0.103157
9030617O03Rik	129.039	41.99	0.674595	178.835	212.522	0.158513	193.031	245.641	0.214175
9030619P08Rik	14.7695	22.9036	0.355145	12.6786	16.6936	0.240512	26.0853	32.7522	0.203555
9030624G23Rik	39.6445	22.9036	0.422275	25.3572	28.8927	0.122369	31.3023	28.0733	0.103157
9030624J02Rik	31.8711	26.7209	0.161594	34.032	43.6601	0.220525	31.3023	35.0916	0.107982
9030625A04Rik	164.019	61.0764	0.627627	200.855	241.415	0.168008	289.547	212.889	0.264751
9130008F23Rik	184.23	45.8073	0.751359	212.867	197.113	0.0740084	242.593	240.962	0.00672252
9130011E15Rik	229.316	64.8936	0.717013	332.979	328.093	0.0146745	491.708	311.145	0.367214
9130011J15Rik	192.781	38.1727	0.801989	311.626	361.48	0.137917	255.636	243.302	0.0482485
9130014G24Rik	9.32812	13.3605	0.301811	22.688	10.915	0.518907	18.2597	18.7155	0.0243552
9130015A21Rik	12.4375	13.3605	0.0690814	12.6786	14.7674	0.141448	14.3469	4.67888	0.673875
9130015A21Rik	19.4336	20.995	0.0743707	12.6786	5.77855	0.544227	24.781	4.67888	0.811191
9130015L21Rik	15.5469	17.1777	0.0949403	13.3459	10.273	0.230251	14.3469	16.3761	0.123911
9130017N09Rik	184.23	55.3505	0.699559	244.897	330.019	0.257932	276.504	236.283	0.145461
9130019O22Rik	112.715	41.99	0.627467	159.483	161.157	0.0103883	153.903	159.082	0.0325539
9130019P16Rik	64.5195	36.2641	0.437936	130.122	159.873	0.186091	159.12	79.541	0.50012
9130023H24Rik	305.496	61.0764	0.800075	456.429	474.483	0.0380504	575.18	308.806	0.463115
9130024F11Rik	107.273	41.99	0.60857	168.825	199.681	0.154525	164.337	166.1	0.0106137
9130204L05Rik	13.2148	17.1777	0.230699	15.3477	6.42061	0.581658	24.781	0	1
9130206I24Rik	30.3164	28.6295	0.0556415	50.047	71.9108	0.304041	97.8198	84.2198	0.139031
9130209A04Rik	16.3242	11.4518	0.298477	18.6842	17.9777	0.0378133	0	4.67888	1
9130221F21Rik	24.0976	13.3605	0.44557	19.3515	11.5571	0.402781	2.60853	18.7155	0.860622
9130221H12Rik	17.8789	19.0864	0.0632632	28.0263	23.7563	0.152359	40.4322	58.486	0.308686
9130227L01Rik	12.4375	5.72591	0.539625	17.3496	18.6198	0.0682144	7.82558	14.0366	0.442489
9130230L23Rik	209.105	51.5332	0.753554	373.684	387.163	0.0348132	440.841	198.852	0.548925
9130401M01Rik	55.9687	20.995	0.62488	64.7275	77.6894	0.166843	95.2113	86.5593	0.0908717
9130404H23Rik	246.418	45.8073	0.814107	375.019	351.849	0.0617824	382.149	224.586	0.412308
9130409I23Rik	12.4375	19.0864	0.348357	12.0113	20.5459	0.415394	19.564	28.0733	0.303111
9230009I02Rik	22.543	13.3605	0.407334	22.0207	14.1253	0.358542	11.7384	25.7338	0.543854
9230102K24Rik	23.3203	22.9036	0.0178671	24.0226	28.2507	0.149664	20.8682	37.431	0.442489
9230102O04Rik	24.0976	17.1777	0.287162	17.3496	20.5459	0.155569	7.82558	18.7155	0.581867
9230104L09Rik	13.9922	15.2691	0.083627	20.6861	10.273	0.503388	14.3469	9.35776	0.347751
9230105E05Rik	23.3203	17.1777	0.2634	22.688	23.1142	0.0184395	13.0426	9.35776	0.282526
9230110C19Rik	35.7578	15.2691	0.572986	44.0414	41.734	0.0523919	35.2151	30.4127	0.136374
9230110F15Rik	9.32812	15.2691	0.389085	6.67293	8.98885	0.257643	2.60853	11.6972	0.776995
9230112D13Rik	23.3203	28.6295	0.185446	16.015	21.188	0.244146	18.2597	16.3761	0.103157
9230112J17Rik	25.6523	20.995	0.181556	18.6842	31.461	0.406115	29.9981	39.7705	0.24572
9230114K14Rik	276.734	68.7109	0.751708	374.352	416.055	0.100236	485.186	437.475	0.0983355
9230115E21Rik	14.7695	22.9036	0.355145	18.0169	17.9777	0.00217675	0	14.0366	1
9230116N13Rik	101.055	43.8986	0.565595	128.788	118.781	0.0776967	134.339	53.8071	0.599468
9330020H09Rik	219.988	55.3505	0.748394	357.002	390.373	0.085485	262.157	294.769	0.110637
9330111N05Rik	59.8555	28.6295	0.521689	72.0677	78.3314	0.0799645	108.254	105.275	0.0275199
9330117O12	13.9922	22.9036	0.389085	12.6786	13.4833	0.0596816	15.6512	9.35776	0.402105
9330133O14Rik	131.371	59.1677	0.549614	179.502	262.603	0.316451	177.38	114.633	0.353746
9330151L19Rik	154.691	64.8936	0.580496	218.872	287.643	0.239084	294.764	259.678	0.119031
9330158H04Rik	17.8789	17.1777	0.0392179	12.0113	10.915	0.0912681	11.7384	2.33944	0.800702
9330159F19Rik	15.5469	13.3605	0.140634	12.6786	5.13649	0.594869	20.8682	14.0366	0.327368
9330159M07Rik	43.5312	28.6295	0.342322	51.3816	64.2061	0.19974	40.4322	79.541	0.491681
9330159M07Rik	43.5312	28.6295	0.342322	51.3816	63.564	0.191656	41.7365	79.541	0.475283
9330162B11Rik	26.4297	22.9036	0.133412	22.0207	8.34679	0.620957	13.0426	4.67888	0.641263
9330175E14Rik	50.5273	32.4468	0.357836	32.6974	28.8927	0.116359	20.8682	14.0366	0.327368
9330175M20Rik	14.7695	9.54318	0.35386	20.0188	19.9039	0.00574041	28.6938	0	1
9330178D15Rik	11.6602	11.4518	0.0178671	14.0132	1.92618	0.862545	10.4341	2.33944	0.775789
9330179D12Rik	185.785	64.8936	0.650706	252.237	186.198	0.261814	299.981	269.036	0.103157
9330179D12Rik	213.769	70.6196	0.669646	286.269	206.102	0.280042	341.717	280.733	0.178465
9330182L06Rik	24.875	19.0864	0.232709	42.7068	34.6713	0.188155	37.8237	21.055	0.443339
9330182O14Rik	10.1055	9.54318	0.0556415	17.3496	16.6936	0.0378133	5.21706	9.35776	0.442489
9430007A20Rik	14.7695	7.63455	0.483088	12.0113	5.13649	0.572361	18.2597	16.3761	0.103157
9430008C03Rik	76.957	26.7209	0.652781	110.103	120.065	0.0829712	78.2558	84.2198	0.0708145
9430008C03Rik	79.289	26.7209	0.662994	109.436	116.213	0.0583144	83.4729	84.2198	0.00886877
[truncated: 24,995 more rows]
