# Supplementary material for: A microbiota-epigenetic circuit controls systematic circadian programs in the gut epithelium
Source: Front Syst Biol. 2023 Aug 8;3:1175306. doi: 10.3389/fsysb.2023.1175306 (PMC12312700; doi:10.3389/fsysb.2023.1175306)
Supplement: Supplementary file 6 [file Table1.XLSX]

## Sheet: WT
Names	BH.Q	ADJ.P	PER	LAG	AMP	ZT2	ZT8	ZT14	ZT20
Zg16	0.0773691	0.0208333	24	12	7539.82	7071.87	17893.9	18907	8403.21
Apoa1	0.0773691	0.0208333	24	12	4373.42	13083	19275.1	22921.9	16744.1
Mir1982	0.0773691	0.0208333	24	9	1820.93	881.814	3829.58	2202.59	0
Actb	0.0773691	0.0208333	24	12	1136.79	2460.62	4338.03	4462.2	3124.29
Anpep	0.0773691	0.0208333	24	12	1055.71	3322.3	4942.19	6261.17	4895.06
Guca2b	0.0773691	0.0208333	24	12	1046.15	1722.87	2959.17	3883.58	2160.93
Guca2a	0.0773691	0.0208333	24	12	1045.09	2061.18	3569.13	3951.39	2503.37
Rpl41	0.0773691	0.0208333	24	9	930.379	2763.72	5254.84	3303.37	2426.2
2210404O07Rik	0.0773691	0.0208333	24	12	866.061	2381.96	3337.26	4114.09	2619.8
Gpx2	0.0773691	0.0208333	24	9	730.687	1008.28	2289.75	1601.29	816.065
Tmsb4x	0.0773691	0.0208333	24	12	604.81	2429.94	3366.65	3393.44	2619.49
Krt8	0.0773691	0.0208333	24	12	603.109	3592.49	4651.59	5170.41	4523.66
Fau	0.0773691	0.0208333	24	9	600.397	1682.7	3373.13	2225.97	1659.91
Gm9846	0.0773691	0.0208333	24	6	600.079	2131.13	3342.64	2054.03	1565.37
Lgals2	0.0773691	0.0208333	24	6	590.639	2486.55	2639.27	1862.46	1592.78
Prap1	0.0773691	0.0208333	24	6	589.692	3596.6	3841	3233.61	2536.09
Slc25a5	0.0773691	0.0208333	24	15	589.642	1489.75	1822.9	3016.47	2045.67
Rps29	0.0773691	0.0208333	24	9	584.084	1845.54	3263.38	2075.21	1524.53
Rplp1	0.0773691	0.0208333	24	9	551.713	1860.78	3145.89	1998.91	1478.75
Naaladl1	0.0773691	0.0208333	24	15	550.656	1114.77	1157.79	1917.31	1912.74
Atp5k	0.0773691	0.0208333	24	9	531.03	1279.19	2835.86	1623.06	1122.4
Mir678	0.0773691	0.0208333	24	6	499.228	1380.19	1627.84	975.193	620.808
Rps12	0.0773691	0.0208333	24	6	494.706	1396.87	2098.29	1203.95	891.97
Lgals4	0.0773691	0.0208333	24	9	491.552	2695.17	3905.02	3144.57	2681.13
Pmp22	0.0773691	0.0208333	24	12	461.098	589.303	1024.03	1906.11	766.818
Rpl28	0.0773691	0.0208333	24	9	453.549	1199.52	2488.89	1612.18	1184.57
Cox6b1	0.0773691	0.0208333	24	9	451.311	1329.48	2191.86	1596.34	1170.84
Anxa2	0.0773691	0.0208333	24	12	443.151	1355.61	2052.68	2334.51	1778.16
Rpl38	0.0773691	0.0208333	24	9	436.483	1651.01	3168.82	1804.49	1392.97
Cox8a	0.0773691	0.0208333	24	9	411.048	1231.67	1843.59	1607.47	1056.77
Tmigd1	0.0773691	0.0208333	24	15	397.573	639.134	1023.94	1604.34	1183.24
Plb1	0.0773691	0.0208333	24	9	396.99	274.249	951.386	474.774	29.0536
Lgals3	0.0773691	0.0208333	24	12	388.395	520.827	887.009	1625.9	787.621
Slc9a3r1	0.0773691	0.0208333	24	12	386.211	824.589	1340.4	1866.15	1289.59
2010107E04Rik	0.0773691	0.0208333	24	9	379.962	999.955	1784.29	1236.08	877.848
Atp1a1	0.0773691	0.0208333	24	12	359.264	651.023	1108.16	1410.99	851.974
Uqcrh	0.0773691	0.0208333	24	9	356.736	1003.91	1617.69	1178.58	783.357
Atp5e	0.0773691	0.0208333	24	9	355.263	750.43	1751.04	1073	738.055
Mir215	0.0773691	0.0208333	24	6	346.311	342.584	743.894	106.963	0
Cox6c	0.0773691	0.0208333	24	9	341.521	984.731	1604.82	1185.4	839.521
Gm5480	0.0773691	0.0208333	24	9	341.389	465.287	1241.67	755.797	433.932
Usmg5	0.0773691	0.0208333	24	9	328.39	1267.06	1733.63	1448.77	986.514
Ndufa4	0.0773691	0.0208333	24	6	325.538	902.971	1233.65	611.182	596.051
Actg1	0.0773691	0.0208333	24	12	320.213	1174.2	1476.1	1987.2	1229.02
Atp5g3	0.0773691	0.0208333	24	9	316.806	990.756	1523.69	1286.37	923.241
Spink4	0.0773691	0.0208333	24	9	312.608	2980.71	3275.44	3028.28	2171.02
Atp5j2	0.0773691	0.0208333	24	9	308.116	751.719	1459.62	928.329	637.834
Uqcrq	0.0773691	0.0208333	24	9	297.935	941.439	1532.56	1143.66	862.764
Rps18	0.0773691	0.0208333	24	6	287.806	923.117	1200.2	701.002	608.277
Rps14	0.0773691	0.0208333	24	6	281.41	965.896	1411.88	877.359	700.58
Rps20	0.0773691	0.0208333	24	9	271.442	916.863	1513.81	946.869	690.951
Clca3	0.0773691	0.0208333	24	12	264.054	790.872	1159.39	1430.27	1051.93
Cox5a	0.0773691	0.0208333	24	9	261.72	677.665	1179.94	881.801	635.049
Rps15	0.0773691	0.0208333	24	6	256.969	949.203	1524.72	890.216	706.93
Ndufa3	0.0773691	0.0208333	24	9	251.784	709.811	1558.53	928.469	691.085
Gm15772	0.0773691	0.0208333	24	6	251.066	868.139	1260.48	741.412	631.432
Serpinb6a	0.0773691	0.0208333	24	12	250.244	507.414	846.399	897.437	528.625
Atp5l	0.0773691	0.0208333	24	9	248.112	868.397	1372.06	945.693	711.771
2210407C18Rik	0.0773691	0.0208333	24	0	246.887	422.91	83.9012	36.5433	395.835
Rpl35	0.0773691	0.0208333	24	6	243.77	777.674	1159.59	677.03	547.845
Uqcr11	0.0773691	0.0208333	24	9	242.905	666.227	1210.84	776.991	547.978
Rps21	0.0773691	0.0208333	24	6	240.347	672.448	1048.98	634.439	407.184
S100a11	0.0773691	0.0208333	24	12	229.271	235.264	577.445	729.101	422.807
Uqcrb	0.0773691	0.0208333	24	9	228.073	833.136	1221.38	983.087	726.242
Myo1a	0.0773691	0.0208333	24	12	223.402	494.846	879.124	967.129	719.53
Rps17	0.0773691	0.0208333	24	6	223.401	728.207	1015.23	610.176	501.387
Rpl19	0.0773691	0.0208333	24	6	220.939	823.116	1120.8	715.588	603.418
Mgst3	0.0773691	0.0208333	24	9	219.89	704.523	1027.92	942.443	643.896
Cox7c	0.0773691	0.0208333	24	9	219.854	584.958	971.779	745.877	510.857
Atp5o	0.0773691	0.0208333	24	9	218.457	746.952	1316.3	917.821	711.858
Ezr	0.0773691	0.0208333	24	15	218.013	554.533	589.216	1070.22	760.078
Fcgbp	0.0773691	0.0208333	24	12	217.749	486.305	824.795	915.186	637.789
Dpep1	0.0773691	0.0208333	24	12	208.428	458.716	769.484	922.738	643.982
Vil1	0.0773691	0.0208333	24	12	203.318	1086.51	1433.4	1589.53	1361.35
Ggt1	0.0773691	0.0208333	24	12	201.863	433.609	743.405	799.249	538.09
Slc13a2	0.0773691	0.0208333	24	15	201.485	189.297	355.714	842.562	379.259
Atpif1	0.0773691	0.0208333	24	9	199.654	780.426	1296.23	919.011	730.775
Rpl10	0.0773691	0.0208333	24	6	196.682	940.702	1290.63	929.661	745.369
Rps28	0.0773691	0.0208333	24	9	196.057	960.89	1791.82	990.361	805.517
Dbi	0.0773691	0.0208333	24	6	193.751	1482.5	2066.07	1379.96	1299.83
2010109I03Rik	0.0773691	0.0208333	24	12	193.679	234.224	440.698	751.888	410.555
Rpl39	0.0773691	0.0208333	24	6	190.908	728.677	1009.74	696.762	501.687
Rpl23a	0.0773691	0.0208333	24	6	190.726	882.78	1263.93	847.665	702.962
Gm12191	0.0773691	0.0208333	24	6	190.195	641.333	934.129	573.664	462.015
Rpl11	0.0773691	0.0208333	24	6	188.615	669.992	892.922	538.895	490.534
Uqcr10	0.0773691	0.0208333	24	9	187.998	568.024	902.104	609.707	412.049
Ceacam1	0.0773691	0.0208333	24	21	187.376	513.732	319.829	429.117	765.192
Rpl35a	0.0773691	0.0208333	24	6	184.112	626.908	872.803	545.613	433.351
Gpx4	0.0773691	0.0208333	24	9	180.38	447.81	715.288	614.409	371.695
Car4	0.0773691	0.0208333	24	12	180.208	216.647	424.816	619.6	318.064
Eef1a1	0.0773691	0.0208333	24	9	179.962	1345.7	1683.76	1454.42	1283.47
Rpl32	0.0773691	0.0208333	24	6	178.481	686.701	980.394	650.083	512.192
Tm4sf5	0.0773691	0.0208333	24	9	178.473	412.406	638.142	564.422	285.36
Fth1	0.0773691	0.0208333	24	6	175.91	2708.41	3792.93	2608.58	2542.56
Ndufb9	0.0773691	0.0208333	24	9	173.435	423.935	742.949	549.352	377.819
Sult2b1	0.0773691	0.0208333	24	12	172.756	145.44	429.754	461.108	256.793
Rpl34	0.0773691	0.0208333	24	6	169.535	887.947	1128.61	850.721	686.319
Slc13a1	0.0773691	0.0208333	24	15	169.487	135.054	195.028	507.128	302.335
Ifi27l2b	0.0773691	0.0208333	24	6	168.465	457.918	670.48	359.203	292.704
Dgat1	0.0773691	0.0208333	24	9	167.511	469.053	673.248	625.857	356.26
Hint1	0.0773691	0.0208333	24	12	166.361	447.118	703.612	718.705	504.659
S100a6	0.0773691	0.0208333	24	12	165.809	183.352	388.361	512.127	248.157
B2m	0.0773691	0.0208333	24	0	164.943	4602.13	4446.62	3680.04	4529.93
Atp1b1	0.0773691	0.0208333	24	12	163.952	488.987	643.562	1016.64	594.52
Rps19	0.0773691	0.0208333	24	6	163.268	488.515	739.049	425.971	334.584
Mdh1	0.0773691	0.0208333	24	6	163.191	575.874	767.402	475.271	406.431
Rps8	0.0773691	0.0208333	24	6	162.256	606.122	842.076	559.163	430.107
Ndufb7	0.0773691	0.0208333	24	9	161.631	348.524	724.661	466.509	314.122
Cox7a2	0.0773691	0.0208333	24	9	160.829	469.253	754.489	540.541	370.884
Rps10	0.0773691	0.0208333	24	9	157.162	521.165	985.137	650.881	502.707
Cox7a1	0.0773691	0.0208333	24	6	156.823	581.525	786.454	505.172	419.244
Lgals6	0.0773691	0.0208333	24	18	155.599	340.371	145.183	398.643	527.012
Rpl12	0.0773691	0.0208333	24	6	155.079	541.226	699.86	436.017	366.438
AI747448	0.0773691	0.0208333	24	18	154.985	761.427	648.871	885.398	963.264
Rps27a	0.0773691	0.0208333	24	6	154.05	471.865	640.14	377.19	299.097
Rps23	0.0773691	0.0208333	24	6	153.436	451.271	652.368	391.296	278.36
Mir5107	0.0773691	0.0208333	24	0	152.903	521.948	377.79	0	436.411
Defa17	0.0773691	0.0208333	24	6	152.336	253.455	261.583	53.1971	30.9693
Mgst2	0.0773691	0.0208333	24	6	151.012	442.231	623.807	360.726	278.185
Rpl37a	0.0773691	0.0208333	24	9	150.583	555.089	1098.43	652.709	510.738
Rps25	0.0773691	0.0208333	24	6	150.391	512.268	678.623	418.877	346.643
Rps3a	0.0773691	0.0208333	24	6	147.338	546.887	701.793	449.164	382.781
Rps5	0.0773691	0.0208333	24	6	144.546	576.328	878.312	551.569	440.049
Atp5h	0.0773691	0.0208333	24	9	143.865	589.937	1024.21	672.081	536.444
Ldha	0.0773691	0.0208333	24	15	143.539	1068.63	1234.33	1370.64	1338.31
Rps24	0.0773691	0.0208333	24	6	143.227	544.17	928.217	528.361	409.134
Anxa4	0.0773691	0.0208333	24	6	141.279	481.877	521.154	308.233	295.2
Rps4x	0.0773691	0.0208333	24	6	137.105	603.659	866.852	567.649	474.395
Serpinb1a	0.0773691	0.0208333	24	12	136.097	531.359	675.31	888.878	647.889
Slc5a1	0.0773691	0.0208333	24	12	134.081	463.632	590.045	763.218	467.69
Rpl36al	0.0773691	0.0208333	24	6	133.288	449.59	607.209	372.007	307.797
Mdh2	0.0773691	0.0208333	24	9	133.028	720.325	889.32	763.725	556.461
Prdx1	0.0773691	0.0208333	24	6	129.837	970.473	984.154	827.642	759.75
Alpi	0.0773691	0.0208333	24	12	127.638	252.322	391.447	509.038	287.148
Cdhr5	0.0773691	0.0208333	24	12	127.046	809.388	1510.21	1512.23	1392.45
Rpl36a	0.0773691	0.0208333	24	6	126.941	421.628	590.675	368.503	284.757
Gapdh	0.0773691	0.0208333	24	12	126.24	840.42	1088.12	1178.81	1059.79
Rpl7	0.0773691	0.0208333	24	6	125.824	599.658	763.914	546.141	461.548
Rpl36	0.0773691	0.0208333	24	9	125.668	537.781	973.417	543.237	424.756
H2-Aa	0.0773691	0.0208333	24	15	124.32	1303.13	1820.3	1937.51	1889.86
Rpl17	0.0773691	0.0208333	24	9	123.798	468.552	781.121	559.876	443.158
Elovl1	0.0773691	0.0208333	24	12	123.764	107.536	225.73	373.758	141.895
Cox7b	0.0773691	0.0208333	24	9	119.995	420.268	634.98	485.275	360.591
Rpl13a	0.0773691	0.0208333	24	6	118.115	451.241	762.652	393.771	339.881
Txn1	0.0773691	0.0208333	24	9	118.049	1032.64	1398.87	1082.62	971.322
Rpl10a	0.0773691	0.0208333	24	6	116.307	433.184	643.903	406.185	323.529
Gm14446	0.0773691	0.0208333	24	21	113.065	232.206	109.727	128.317	325.633
Vdac2	0.0773691	0.0208333	24	12	112.669	355.028	487.765	588.315	402.376
Rplp0	0.0773691	0.0208333	24	9	109.895	520.068	785.349	562.726	459.116
Igj	0.0773691	0.0208333	24	21	109.758	359.85	232.21	271.8	454.602
Ndufa2	0.0773691	0.0208333	24	9	108.84	263.129	485.787	332.391	229.776
Rpl9	0.0773691	0.0208333	24	6	108.578	507.609	733.313	485.751	405.241
Calm1	0.0773691	0.0208333	24	12	107.008	718.624	845.424	948.125	772.261
Epcam	0.0773691	0.0208333	24	12	106.511	1409.3	1565.81	1646.8	1502.05
Rpsa	0.0773691	0.0208333	24	6	106.082	334.302	453.062	267.909	219.411
Ndufa6	0.0773691	0.0208333	24	9	105.902	444.577	639.369	513.388	408.644
Vamp8	0.0773691	0.0208333	24	9	105.33	332.682	533.186	416.418	317.112
Aldoa	0.0773691	0.0208333	24	15	104.13	381.074	522.031	632.419	565.209
Oat	0.0773691	0.0208333	24	0	102.648	349.339	164.019	100.767	205.78
Tceb2	0.0773691	0.0208333	24	9	102.555	548.237	922.706	634.28	537.59
Ndufc1	0.0773691	0.0208333	24	9	101.947	251.099	446.159	315.877	219.76
Rpl13	0.0773691	0.0208333	24	6	101.184	511.972	865.347	492.192	416.575
Mep1a	0.0773691	0.0208333	24	15	100.275	297.992	447.447	553.334	475.725
Pepd	0.0773691	0.0208333	24	12	99.1975	327.425	490.522	498.124	380.648
Pkm2	0.0773691	0.0208333	24	12	98.8804	218.067	375.262	466.35	343.869
Cib1	0.0773691	0.0208333	24	9	97.5182	470.301	688.759	540.347	448.406
Ndufb8	0.0773691	0.0208333	24	9	96.6728	257.73	428.22	352.807	249.865
Rfk	0.0773691	0.0208333	24	12	95.8989	322.905	414.048	573.708	393.608
2023-09-05	0.0773691	0.0208333	24	12	94.5419	253.441	417.137	494.214	390.505
Ubb	0.0773691	0.0208333	24	12	94.0166	421.219	572.252	641.089	526.203
Rpl23	0.0773691	0.0208333	24	6	93.8621	368.619	532.064	361.965	273.236
Cyb5	0.0773691	0.0208333	24	6	92.5949	615.794	695.805	606.513	443.188
Atp5g1	0.0773691	0.0208333	24	9	92.4206	327.95	552.518	381.426	294.291
Cdhr2	0.0773691	0.0208333	24	15	92.154	492.309	640.701	735.364	658.297
Fdps	0.0773691	0.0208333	24	12	91.5735	165.191	295.788	418.91	290.498
Slc34a2	0.0773691	0.0208333	24	0	91.3366	301.072	189.998	148.488	295.753
Rpl8	0.0773691	0.0208333	24	6	91.1128	456.15	704.742	426.928	370.248
Abp1	0.0773691	0.0208333	24	3	90.9764	661.958	594.302	445.486	553.454
Rpl18a	0.0773691	0.0208333	24	6	90.206	361.135	557.271	348.255	276.088
Rps7	0.0773691	0.0208333	24	6	90.0214	368.404	448.779	314.159	248.405
Ndufa1	0.0773691	0.0208333	24	9	89.0714	211.455	367.6	300.161	204.374
Nos2	0.0773691	0.0208333	24	18	88.2588	88.0557	65.0276	152.945	249.772
Espn	0.0773691	0.0208333	24	12	88.0991	143.55	279.54	347.931	234.739
Rpl27a	0.0773691	0.0208333	24	6	86.2009	311.845	431.642	273.607	226.067
Xpnpep2	0.0773691	0.0208333	24	12	85.7639	152.05	265.72	361.93	233.023
Xpnpep1	0.0773691	0.0208333	24	12	84.4954	328.314	442.193	463.21	338.1
Aldob	0.0773691	0.0208333	24	18	83.283	1246.02	1130.07	1274.23	1337.42
Gabarap	0.0773691	0.0208333	24	9	82.8319	477.062	604.79	581.791	475.235
Duoxa2	0.0773691	0.0208333	24	18	81.5828	195.203	166.419	289.779	302.594
Pcyt2	0.0773691	0.0208333	24	12	81.0316	146.357	255.683	297.014	177.148
Chchd2	0.0773691	0.0208333	24	6	80.5076	374.221	491.56	361.799	276.272
Slc3a1	0.0773691	0.0208333	24	15	80.2615	95.4682	99.466	235.214	186.734
Pnp2	0.0773691	0.0208333	24	3	79.5084	233.594	173.119	57.0454	124.784
Rpl3	0.0773691	0.0208333	24	6	79.0312	270.787	343.877	208.091	183.039
Slc10a2	0.0773691	0.0208333	24	15	78.9729	62.615	68.5868	191.75	162.821
Rpl37	0.0773691	0.0208333	24	6	78.9269	277.707	407.107	237.147	203.294
Rpl27	0.0773691	0.0208333	24	6	78.7424	337.617	455.504	289.676	263.378
Sis	0.0773691	0.0208333	24	21	77.9999	387.924	197.342	332.022	405.561
Atp5j	0.0773691	0.0208333	24	6	77.9868	429.086	518.122	391.659	334.969
Rpl24	0.0773691	0.0208333	24	6	76.254	383.807	633.627	380.581	311.914
Chchd7	0.0773691	0.0208333	24	9	76.1512	170.083	353.203	238.677	166.881
Tpi1	0.0773691	0.0208333	24	12	76.0476	543.962	669.064	687.775	597.782
Slc25a3	0.0773691	0.0208333	24	9	75.193	682.154	804.884	717.507	627.559
Tmbim6	0.0773691	0.0208333	24	12	73.7689	899.738	1167.82	1171.44	1101.89
Rps2	0.0773691	0.0208333	24	9	73.7647	552.428	787.558	564.957	495.411
Rpl7a	0.0773691	0.0208333	24	9	73.5769	591.659	784.842	611.181	541.812
Clic1	0.0773691	0.0208333	24	9	73.1502	272.561	377.231	347.063	244.833
Anxa13	0.0773691	0.0208333	24	3	72.5035	436.393	348.255	253.723	325.854
Hist1h2bc	0.0773691	0.0208333	24	15	72.0934	184.126	234.726	359.821	262.942
Amn	0.0773691	0.0208333	24	12	72.0243	94.7875	202.146	212.38	116.023
Atp5a1	0.0773691	0.0208333	24	9	71.824	429.673	562.074	487.222	416.474
Rpl29	0.0773691	0.0208333	24	9	71.3856	552.056	918.86	595.717	528.414
Rps13	0.0773691	0.0208333	24	9	71.1862	354.135	583.117	402.349	335.234
Gm20594	0.0773691	0.0208333	24	15	70.8125	487.778	536.428	655.883	568.611
Rhoc	0.0773691	0.0208333	24	12	70.6018	204.765	312.172	380.575	288.29
Rps6	0.0773691	0.0208333	24	6	69.4782	289.568	356.194	247.043	202.205
Gnb2l1	0.0773691	0.0208333	24	6	69.3092	353.564	453.636	327.565	283.599
Cda	0.0773691	0.0208333	24	6	69.1762	134.236	224.457	114.417	48.6161
Shfm1	0.0773691	0.0208333	24	6	69.0309	358.01	570.28	353.8	292.927
Sepp1	0.0773691	0.0208333	24	18	68.8793	2453.45	1651.93	2474.84	2518.39
Pdlim1	0.0773691	0.0208333	24	15	68.4472	202.291	238.851	358.271	276.469
Slc7a7	0.0773691	0.0208333	24	12	68.0442	182.664	258.074	314.314	197.266
Rpl4	0.0773691	0.0208333	24	6	67.7419	379.255	452.846	346.533	293.965
Dhcr24	0.0773691	0.0208333	24	15	67.6277	103.442	120.144	301.576	167.202
Fam162a	0.0773691	0.0208333	24	15	67.5999	90.3526	122.575	235.453	168.676
Ndufa5	0.0773691	0.0208333	24	6	67.5856	197.537	287.558	171.766	122.168
Gm5485	0.0773691	0.0208333	24	15	67.0889	131.11	156.741	290.957	194.362
Cyc1	0.0773691	0.0208333	24	9	66.2322	316.266	432.397	355.745	284.543
Nme2	0.0773691	0.0208333	24	6	65.6531	231.159	325.839	208.128	163.175
Ndufa7	0.0773691	0.0208333	24	9	65.0089	261.728	395.651	309.951	248.66
Rpl31	0.0773691	0.0208333	24	6	64.1763	270.03	343.337	232.069	199.78
Dhrs11	0.0773691	0.0208333	24	12	63.8974	211.167	356.97	357.823	297.58
Aprt	0.0773691	0.0208333	24	9	63.2737	261.652	409.267	277.33	217.675
Mgam	0.0773691	0.0208333	24	12	62.9611	225.325	294.527	394.93	286.051
Ndufb10	0.0773691	0.0208333	24	9	62.7497	193.45	406.453	252.316	193.155
Ccdc72	0.0773691	0.0208333	24	9	62.5758	293.788	391.109	311.694	232.024
Vnn1	0.0773691	0.0208333	24	3	62.3938	210.988	139.472	79.8814	94.1022
Atp5c1	0.0773691	0.0208333	24	9	62.2905	391.48	516.673	400.671	341.943
Eps8l2	0.0773691	0.0208333	24	15	62.2102	181.116	206.246	290.653	272.666
Tmem59	0.0773691	0.0208333	24	12	61.6003	220.071	305.767	365.637	277.101
Tmem120a	0.0773691	0.0208333	24	9	60.61	158.899	253.319	205.567	128.556
Mttp	0.0773691	0.0208333	24	3	59.7332	494.992	330.396	274.079	324.773
AA467197	0.0773691	0.0208333	24	12	59.6653	289.259	426.5	459.24	402.987
Gm1821	0.0773691	0.0208333	24	12	59.3464	330.137	398.539	469.253	369.798
Arf5	0.0773691	0.0208333	24	9	59.3439	273.079	374.848	289.472	223.391
Lamp1	0.0773691	0.0208333	24	12	59.1438	231.609	305.988	369.255	276.35
Sc4mol	0.0773691	0.0208333	24	15	58.8953	136.794	172.727	333.837	192.321
Mpp1	0.0773691	0.0208333	24	12	58.4222	227.55	312.379	345.76	265.346
Dstn	0.0773691	0.0208333	24	6	57.4347	1111.03	1183.51	1062.34	1056.88
Btnl5	0.0773691	0.0208333	24	18	57.369	132.756	58.474	168.317	186.844
Slc7a9	0.0773691	0.0208333	24	12	56.6976	328.825	386.425	485.145	382.38
Arhgdia	0.0773691	0.0208333	24	12	56.6329	185.634	306.859	314.711	261.317
Myeov2	0.0773691	0.0208333	24	9	56.3412	154.762	268.74	181.911	128.792
Ndufs6	0.0773691	0.0208333	24	9	55.3336	241.193	456.191	247.178	195.009
Cox17	0.0773691	0.0208333	24	6	55.0599	344.429	525.903	318.569	292.518
Cltb	0.0773691	0.0208333	24	12	54.4578	71.8662	152.881	203.51	130.495
Abcb1a	0.0773691	0.0208333	24	15	54.1379	31.9785	66.7249	182.826	83.0202
Sec61b	0.0773691	0.0208333	24	9	53.8603	320.263	441.638	325.102	274.322
Rpl5	0.0773691	0.0208333	24	6	53.6408	187.942	229.291	137.6	127.914
Capzb	0.0773691	0.0208333	24	12	53.6111	286.994	391.061	412.761	362.216
Cyp4f14	0.0773691	0.0208333	24	12	52.9216	679.17	729.065	1045.25	704.31
Mettl7b	0.0773691	0.0208333	24	15	52.7159	79.0778	166.229	217.563	176.847
Ucp2	0.0773691	0.0208333	24	12	52.6828	68.5945	130.06	216.351	128.807
Romo1	0.0773691	0.0208333	24	9	52.4889	170.2	332.988	219.183	169.696
Sdhb	0.0773691	0.0208333	24	9	52.2015	240.172	392.92	286.783	237.567
Gpt	0.0773691	0.0208333	24	12	51.7871	165.028	237.579	311.187	237.262
Stard10	0.0773691	0.0208333	24	9	51.5884	108.158	222.31	151.895	103.257
Atp5g2	0.0773691	0.0208333	24	9	51.5417	248.325	334.069	263.528	203.49
Ace2	0.0773691	0.0208333	24	15	51.32	542.935	587.796	818.895	591.32
Eif5a	0.0773691	0.0208333	24	6	51.0602	321.49	371.757	274.073	273.35
Ndufb3	0.0773691	0.0208333	24	9	49.8627	172.472	275.65	184.272	137.261
Eef2	0.0773691	0.0208333	24	15	49.413	302.061	388.737	435.324	398.023
Snrpg	0.0773691	0.0208333	24	3	49.3271	158.345	151.136	80.4064	89.5566
4931406C07Rik	0.0773691	0.0208333	24	18	48.9301	136.738	99.0698	160.852	213.351
Ctnnb1	0.0773691	0.0208333	24	21	48.7554	216.928	142.518	201.385	264.876
Tspan8	0.0773691	0.0208333	24	9	48.2897	387.289	537.044	415.24	369.712
Ndufb4	0.0773691	0.0208333	24	6	48.0447	290.061	321.805	266.164	209.811
Nme7	0.0773691	0.0208333	24	9	47.5823	53.8222	120.225	116.429	48.2487
B4galnt1	0.0773691	0.0208333	24	12	47.5613	77.1678	153.121	153.201	94.6305
Tagln2	0.0773691	0.0208333	24	12	47.1545	157.619	228.172	246.637	183.817
Naca	0.0773691	0.0208333	24	6	46.7221	221.675	261.745	179.308	171.962
Pfdn5	0.0773691	0.0208333	24	9	46.6987	186.577	334.834	214.826	170.798
Sgk1	0.0773691	0.0208333	24	15	46.5177	28.8639	60.2963	195.061	72.7212
Gnb1	0.0773691	0.0208333	24	12	46.4873	291.224	350.154	379.151	306.595
Btnl6	0.0773691	0.0208333	24	18	46.459	142.393	40.0746	165.513	186.195
Ndufb11	0.0773691	0.0208333	24	9	46.4187	138.977	233.142	168.868	125.104
Aspa	0.0773691	0.0208333	24	9	46.079	110.417	175.695	174.713	109.66
Timm8b	0.0773691	0.0208333	24	6	45.9644	191.365	247.22	166.917	141.661
Sqrdl	0.0773691	0.0208333	24	15	45.8742	69.3289	86.8914	148.298	137.674
Emp1	0.0773691	0.0208333	24	15	45.7717	138.991	153.447	263.719	182.145
Degs2	0.0773691	0.0208333	24	12	45.7162	107.803	185.671	217.263	165.826
Rpl21	0.0773691	0.0208333	24	6	45.4334	203.372	318.262	198.625	160.537
Cdipt	0.0773691	0.0208333	24	12	45.3789	109.24	182.302	190.248	134.959
Uqcrfs1	0.0773691	0.0208333	24	9	45.3096	217.667	298.127	240.364	192.669
Ppp1r1b	0.0773691	0.0208333	24	12	45.2071	112.723	188.803	202.428	150.643
Lap3	0.0773691	0.0208333	24	9	44.9688	261.209	372.929	289.798	247.401
Ms4a10	0.0773691	0.0208333	24	9	44.8559	127.107	172.3	145.283	63.6044
Mpst	0.0773691	0.0208333	24	12	44.8395	53.0796	110.336	162.924	93.3552
Etfb	0.0773691	0.0208333	24	9	44.7885	240.502	364.746	264.19	221.963
Sqstm1	0.0773691	0.0208333	24	21	44.5297	199.275	138.675	141.993	207.342
Prepl	0.0773691	0.0208333	24	12	44.4431	79.5936	121.495	192.94	105.245
Hpgd	0.0773691	0.0208333	24	15	43.9074	36.6623	65.0738	144.101	81.8239
Rps3	0.0773691	0.0208333	24	6	43.5694	208.099	262.819	186.198	161.487
Rpl6	0.0773691	0.0208333	24	6	43.434	282.558	411.81	273.252	241.608
Dpp4	0.0773691	0.0208333	24	12	42.7181	189.879	230.154	299.641	199.956
Sdhd	0.0773691	0.0208333	24	6	42.1605	275.14	289.4	241.474	203.818
Ctsd	0.0773691	0.0208333	24	9	41.7964	174.46	247.044	219.543	173.909
1810006K21Rik	0.0773691	0.0208333	24	6	41.7511	293.366	323.63	273.032	225.874
Atp6v0b	0.0773691	0.0208333	24	9	41.6408	117.355	187.032	159.391	111.29
Mlf2	0.0773691	0.0208333	24	12	41.6214	188.156	300.822	307.657	268.416
Ndufa13	0.0773691	0.0208333	24	9	41.6139	129.671	239.652	151.715	112.481
Cbr1	0.0773691	0.0208333	24	6	41.1618	142.352	149.878	97.1127	78.6941
Cs	0.0773691	0.0208333	24	12	40.9531	402.074	440.685	628.433	422.158
1810035L17Rik	0.0773691	0.0208333	24	6	40.6827	150.478	203.828	117.656	112.122
Slc25a1	0.0773691	0.0208333	24	12	40.6213	82.8975	152.171	171.327	125.706
Ccrn4l	0.0773691	0.0208333	24	15	39.9811	39.3631	51.6533	125.742	78.358
Copz1	0.0773691	0.0208333	24	6	39.8285	208.289	244.622	179.364	160.895
Ndufb2	0.0773691	0.0208333	24	9	39.6517	148.691	252.436	162.861	125.477
Jund	0.0773691	0.0208333	24	12	39.4951	106.263	169.642	208.201	159.871
Pitpna	0.0773691	0.0208333	24	12	39.4435	142.173	195.759	219.291	161.314
Fdft1	0.0773691	0.0208333	24	12	39.0149	63.0643	109.787	168.497	104.869
Myl9	0.0773691	0.0208333	24	3	38.9867	145.11	48.387	11.63	13.1316
Prdx2	0.0773691	0.0208333	24	9	38.9485	195.945	284.397	210.018	173.297
Aco2	0.0773691	0.0208333	24	15	38.9351	237.394	259.512	322.645	284.386
Slc52a3	0.0773691	0.0208333	24	12	38.8552	117.343	175.345	187.408	135.511
Oaz1	0.0773691	0.0208333	24	9	38.6867	87.5274	155.802	107.186	66.0381
Mrps36	0.0773691	0.0208333	24	9	38.6838	84.0338	138.183	134.481	79.2158
Nucb1	0.0773691	0.0208333	24	15	38.6604	150.894	205.746	252.917	213.071
D8Ertd738e	0.0773691	0.0208333	24	9	38.2463	163.104	242.484	183.939	147.88
Hagh	0.0773691	0.0208333	24	12	38.0287	85.4766	132.402	156.946	96.31
Sec61g	0.0773691	0.0208333	24	6	37.9798	182.168	237.361	168.423	143.683
D4Wsu53e	0.0773691	0.0208333	24	6	37.9455	293.614	328.767	275.928	239.127
Sord	0.0773691	0.0208333	24	15	37.8505	85.0482	99.3323	198.358	120.734
Prdx6	0.0773691	0.0208333	24	0	37.1748	138.011	88.2549	70.7149	126.105
Atp6v1e1	0.0773691	0.0208333	24	12	36.8576	100.843	148.021	171.487	114.416
Ywhah	0.0773691	0.0208333	24	15	36.7798	122.146	149.896	214.174	161.897
Slc6a8	0.0773691	0.0208333	24	12	36.7731	242.844	277.514	583.248	252.272
Wbp2	0.0773691	0.0208333	24	12	36.7455	88.937	150.368	172.601	130.1
Pdcd6	0.0773691	0.0208333	24	9	36.6055	156.504	203.99	189.821	133.771
Cdc42se2	0.0773691	0.0208333	24	15	36.5985	64.9641	76.8036	171.868	99.4695
Slc25a45	0.0773691	0.0208333	24	0	36.4584	109.986	43.484	21.9113	58.5291
Lamb3	0.0773691	0.0208333	24	15	36.4213	17.5243	50.4116	129.545	51.8626
Psma7	0.0773691	0.0208333	24	6	35.9394	152.601	189.465	122.918	117.496
Krt18	0.0773691	0.0208333	24	0	35.9267	281.953	240.071	216.73	276.464
Dynlrb1	0.0773691	0.0208333	24	9	35.8355	173.765	286.803	196.453	162.667
Dusp6	0.0773691	0.0208333	24	0	35.7845	82.8835	39.7428	23.3966	81.4698
Pnrc1	0.0773691	0.0208333	24	0	35.5781	153.818	91.7809	78.789	117.382
Ndufb5	0.0773691	0.0208333	24	6	35.0821	130.485	196.198	127.269	97.4093
Mrpl54	0.0773691	0.0208333	24	9	34.9176	101.759	170.762	120.697	87.7764
Atp5f1	0.0773691	0.0208333	24	9	34.9162	251.276	307.206	262.388	219.56
Cstb	0.0773691	0.0208333	24	9	34.8057	99.401	156.958	135.241	94.3527
Srxn1	0.0773691	0.0208333	24	12	34.8056	262.539	295.354	342.965	264.215
Mrpl12	0.0773691	0.0208333	24	6	34.7831	115.249	141.543	86.7426	71.668
Max	0.0773691	0.0208333	24	12	34.5924	113.052	152.5	192.999	134.605
Ndufa12	0.0773691	0.0208333	24	9	34.3293	180.624	266.112	198.526	166.16
Cdh1	0.0773691	0.0208333	24	21	34.2611	193.755	149.298	155.549	207.997
Gna11	0.0773691	0.0208333	24	12	34.2604	229.2	304.961	315.029	282.728
Scd2	0.0773691	0.0208333	24	18	34.2372	93.4261	43.1376	99.7831	133.618
Rhob	0.0773691	0.0208333	24	15	34.1206	45.3375	67.7609	109.235	100.371
Tmem86b	0.0773691	0.0208333	24	9	33.8233	60.6251	108.335	99.047	51.0903
Scin	0.0773691	0.0208333	24	12	33.7889	58.0603	113.766	120.589	80.7254
Ndufb6	0.0773691	0.0208333	24	9	33.7134	145.986	202.725	157.365	118.748
Snrpd2	0.0773691	0.0208333	24	6	33.5674	114.909	154.105	90.9535	83.1175
Suox	0.0773691	0.0208333	24	15	33.4942	217.309	253.088	291.432	273.701
Ccl6	0.0773691	0.0208333	24	0	33.4917	160.322	106.338	74.2271	114.972
Efhd2	0.0773691	0.0208333	24	15	33.3967	170.841	199.354	232.359	232.296
Dnpep	0.0773691	0.0208333	24	9	32.8677	189.964	233.765	214.55	165.387
Rab7	0.0773691	0.0208333	24	18	32.5629	102.19	80.4341	117.919	156.807
Hadh	0.0773691	0.0208333	24	3	32.5117	357.132	342.006	292.204	314.977
H2-Q2	0.0773691	0.0208333	24	18	32.3395	246.134	116.256	264.206	276.624
2310036O22Rik	0.0773691	0.0208333	24	9	32.1274	136.902	195.899	157.681	125.808
Pdzk1	0.0773691	0.0208333	24	9	32.0362	190.279	228.701	204.681	152.491
Dfna5	0.0773691	0.0208333	24	15	31.7816	62.7829	76.8343	123.114	106.395
Rpl22l1	0.0773691	0.0208333	24	6	31.718	126.386	143.298	98.1526	81.8193
Cldn4	0.0773691	0.0208333	24	3	31.538	166.264	163.205	118.673	121.593
Cuta	0.0773691	0.0208333	24	9	31.4822	94.618	152.721	124.496	93.554
Mrpl33	0.0773691	0.0208333	24	9	31.4677	116.74	185.291	135.643	105.975
Atp6v1g1	0.0773691	0.0208333	24	12	31.3294	104.327	153.144	173.776	133.98
Use1	0.0773691	0.0208333	24	9	31.0254	86.2415	150.447	113.76	84.509
Ctss	0.0773691	0.0208333	24	15	30.9628	144.572	185.1	214.292	203.669
Dgka	0.0773691	0.0208333	24	15	30.9172	113.351	134.134	209.872	142.5
Aldh2	0.0773691	0.0208333	24	15	30.897	73.0763	116.893	146.023	132.757
Vti1b	0.0773691	0.0208333	24	9	30.8781	111.975	154.086	139.719	94.4936
Ifi30	0.0773691	0.0208333	24	9	30.7984	123.518	182.237	151.04	122.003
Ephx2	0.0773691	0.0208333	24	15	30.7198	40.1678	49.8896	133.147	69.1307
Anapc13	0.0773691	0.0208333	24	9	30.6488	153.044	270.912	174.37	145.474
Ndufs3	0.0773691	0.0208333	24	6	30.5498	133.836	178.38	121.218	104.59
Eef1b2	0.0773691	0.0208333	24	6	30.4569	111.127	157.652	106.103	76.5309
Eno1	0.0773691	0.0208333	24	18	30.3038	52.8852	33.2013	80.9882	90.8103
Rorc	0.0773691	0.0208333	24	18	30.1957	24.3329	20.7805	62.5713	67.9485
Ugt1a6b	0.0773691	0.0208333	24	9	30.1697	70.4	108.832	88.9148	42.0141
Ogdh	0.0773691	0.0208333	24	12	30.1401	101.099	141.956	166.492	122.1
Pmvk	0.0773691	0.0208333	24	15	30.1276	47.2407	80.1959	114.317	98.3334
AA986860	0.0773691	0.0208333	24	15	29.7117	60.371	82.5597	135.41	91.5582
Perp	0.0773691	0.0208333	24	12	29.5472	139.27	183.546	192.388	153.092
Ost4	0.0773691	0.0208333	24	9	29.375	369.878	454.774	377.398	349.703
Insig2	0.0773691	0.0208333	24	0	29.2898	93.46	41.2515	21.3361	51.9716
Surf4	0.0773691	0.0208333	24	6	29.1819	212.201	213.007	185.494	155.829
Mosc2	0.0773691	0.0208333	24	3	29.0861	167.504	150.688	112.69	123.234
Mpnd	0.0773691	0.0208333	24	12	29.0769	51.4852	100.724	101.418	68.4148
H2-Bl	0.0773691	0.0208333	24	9	29.0445	46.3469	101.987	52.2423	24.8589
Snrpe	0.0773691	0.0208333	24	6	28.6447	117.276	132.745	86.8385	82.163
Gltp	0.0773691	0.0208333	24	15	28.6039	106.709	115.48	172.774	133.677
Sqle	0.0773691	0.0208333	24	15	28.4656	75.9974	94.901	150.841	102.835
Ssr4	0.0773691	0.0208333	24	9	28.402	209.924	261.5	215.677	186.92
Arpc3	0.0773691	0.0208333	24	9	28.3058	322.594	448.693	329.108	302.421
Ppa1	0.0773691	0.0208333	24	3	28.2953	116.964	112.952	70.8928	78.9919
0610005C13Rik	0.0773691	0.0208333	24	9	28.2832	12.9113	63.7161	41.7913	12.5991
Mtch2	0.0773691	0.0208333	24	6	28.2546	157.991	159.613	126.39	111.298
Cdk2ap2	0.0773691	0.0208333	24	12	28.0796	115.867	165.842	169.909	140.463
Tuba4a	0.0773691	0.0208333	24	12	28.0668	81.1036	122.067	128.12	89.6985
Rnase4	0.0773691	0.0208333	24	3	27.9281	108.738	78.6903	43.2599	65.1758
Ndufc2	0.0773691	0.0208333	24	6	27.9192	105.973	156.213	101.326	79.6505
Klc4	0.0773691	0.0208333	24	12	27.9145	113.886	151.291	176.658	135.109
Tmed4	0.0773691	0.0208333	24	6	27.8919	119.296	132.762	88.9365	84.2314
Atf4	0.0773691	0.0208333	24	9	27.8434	188.389	257.618	207.941	181.69
Fam96b	0.0773691	0.0208333	24	12	27.7204	65.7738	107.778	118.511	82.1102
Hsd17b6	0.0773691	0.0208333	24	3	27.5837	67.5339	36.2317	7.70673	18.0404
Ostc	0.0773691	0.0208333	24	6	27.5333	151.77	161.165	122.707	112.352
Cryl1	0.0773691	0.0208333	24	9	27.4803	118.518	167.147	146.053	116.956
Kdelr1	0.0773691	0.0208333	24	9	27.3378	119.451	163.424	137.407	104.057
Rpl15	0.0773691	0.0208333	24	6	27.1773	169.66	179.355	144.823	127.323
Gnas	0.0773691	0.0208333	24	15	27.1253	321.823	404.855	430.429	405.332
Gdpd1	0.0773691	0.0208333	24	6	26.6975	147.904	172.921	122.779	122.534
Pgrmc1	0.0773691	0.0208333	24	12	26.5897	151.355	176.424	226.302	174.865
Reep6	0.0773691	0.0208333	24	12	26.391	88.6749	122.327	152.85	111.857
Duox2	0.0773691	0.0208333	24	18	26.382	46.1529	18.8937	57.0348	82.6315
Ubc	0.0773691	0.0208333	24	9	26.2975	113.119	141.365	119.506	73.3714
BC031181	0.0773691	0.0208333	24	9	26.2609	110.039	157.432	134.215	107.331
Sertad1	0.0773691	0.0208333	24	9	26.2016	89.6004	172.199	108.875	84.1719
Pdk2	0.0773691	0.0208333	24	12	26.1732	35.2408	59.9171	111.294	56.9242
Epn1	0.0773691	0.0208333	24	12	26.0339	123.032	216.312	219.808	195.263
Mrpl23	0.0773691	0.0208333	24	6	25.9901	66.2473	113.621	64.2103	41.7436
Sec11c	0.0773691	0.0208333	24	6	25.9803	116.859	129.861	91.3052	81.9313
Dlst	0.0773691	0.0208333	24	12	25.7783	127.608	151.912	183.857	128.166
Nr1d1	0.0773691	0.0208333	24	9	25.7544	19.6478	80.7379	25.6256	1.3441
Tbca	0.0773691	0.0208333	24	9	25.6977	178.229	218.923	190.01	158.02
Slc7a15	0.0773691	0.0208333	24	12	25.6479	37.4889	61.67	165.597	56.7149
Glrx	0.0773691	0.0208333	24	18	25.6149	591.006	590.757	614.907	690.651
Qdpr	0.0773691	0.0208333	24	12	25.3299	51.0681	87.7636	112.38	77.4317
H3f3a	0.0773691	0.0208333	24	12	25.178	250.782	317.138	321.197	297.459
Dak	0.0773691	0.0208333	24	15	25.1143	86.9131	111.502	138.514	130.935
1500003O03Rik	0.0773691	0.0208333	24	15	25.069	95.9527	100.433	167.413	119.588
Ndufv2	0.0773691	0.0208333	24	6	25.0659	134.919	178.864	134.042	108.844
1110007C09Rik	0.0773691	0.0208333	24	12	25.0284	46.8692	77.4102	97.7462	57.4962
Herpud1	0.0773691	0.0208333	24	15	25.0057	50.685	63.6897	105.068	80.0336
Cdc42ep2	0.0773691	0.0208333	24	12	24.9184	47.9682	74.7997	98.5318	54.8835
Lct	0.0773691	0.0208333	24	9	24.8771	17.818	75.3068	24.6876	1.23328
Snora34	0.0773691	0.0208333	24	12	24.8672	20.6124	59.6776	77.2282	45.9584
Psma4	0.0773691	0.0208333	24	6	24.8205	163.772	205.058	145.944	140.371
Ndufs4	0.0773691	0.0208333	24	9	24.6878	80.9397	127.248	88.0174	64.498
Arl1	0.0773691	0.0208333	24	21	24.6718	105.995	70.6858	89.6677	124.141
Vmp1	0.0773691	0.0208333	24	0	24.5259	141.965	114.46	75.7902	117.655
Chka	0.0773691	0.0208333	24	3	24.5196	81.8497	67.2467	28.537	51.2074
Treh	0.0773691	0.0208333	24	12	24.4744	71.1665	94.2412	156.247	87.1834
Rac1	0.0773691	0.0208333	24	12	24.4638	278.538	317.832	323.158	293.258
B4galnt2	0.0773691	0.0208333	24	12	24.4602	148.449	187.795	205.038	175.2
Rassf7	0.0773691	0.0208333	24	12	24.4433	65.9973	106.695	119.745	91.3067
Got1	0.0773691	0.0208333	24	12	24.4206	58.6153	81.6393	113.728	61.3085
Soat2	0.0773691	0.0208333	24	6	24.3485	130.022	163.277	107.318	107.066
Ocm	0.0773691	0.0208333	24	9	24.2887	81.7381	262.419	93.2668	70.3672
Eif4ebp3	0.0773691	0.0208333	24	12	24.2618	30.3886	56.0036	81.4793	38.4716
Cubn	0.0773691	0.0208333	24	15	24.2376	28.9762	50.0374	88.9047	58.6631
Aldh9a1	0.0773691	0.0208333	24	12	24.2096	150.141	172.966	214.133	167.932
Psenen	0.0773691	0.0208333	24	9	24.0399	212.019	297.038	228.855	206.19
Susd2	0.0773691	0.0208333	24	12	23.989	47.5957	70.2127	160.56	69.8953
Nbl1	0.0773691	0.0208333	24	15	23.9317	35.5444	67.5499	98.1555	72.628
Slc35c2	0.0773691	0.0208333	24	9	23.8897	43.9009	76.3015	65.0856	29.9158
Pdia3	0.0773691	0.0208333	24	3	23.8702	293.967	263.528	237.856	252.124
Hsd17b11	0.0773691	0.0208333	24	3	23.6877	330.074	217.706	195.373	201.448
Cox7a2l	0.0773691	0.0208333	24	9	23.6135	134.367	222.28	137.335	115.072
Gabarapl2	0.0773691	0.0208333	24	12	23.5551	143.335	175.829	182.938	148.808
Rpl14	0.0773691	0.0208333	24	9	23.5467	230.107	406.473	242.248	220.048
Vdr	0.0773691	0.0208333	24	21	23.5285	108.406	74.8434	83.771	116.757
Atp6v1f	0.0773691	0.0208333	24	9	23.4024	138.179	193.454	142.627	120.563
1810046J19Rik	0.0773691	0.0208333	24	9	23.3982	102.598	136.729	134.542	102.493
Ehd1	0.0773691	0.0208333	24	12	23.3582	60.9158	96.596	102.367	71.9803
Nupr1	0.0773691	0.0208333	24	3	23.089	73.2152	47.9556	25.1133	30.752
Grina	0.0773691	0.0208333	24	15	22.9368	192.336	249.006	270.631	260.548
Tsc22d3	0.0773691	0.0208333	24	15	22.7586	25.269	41.6491	102.972	46.726
Arpc2	0.0773691	0.0208333	24	15	22.7448	240.327	278.749	300.193	287.163
Acot11	0.0773691	0.0208333	24	6	22.7123	51.2933	62.2499	32.9445	16.3585
Cyp51	0.0773691	0.0208333	24	15	22.6649	46.9828	55.8442	93.9965	72.9364
Ywhaz	0.0773691	0.0208333	24	12	22.6239	197.597	221.72	252.476	212.609
Tm4sf4	0.0773691	0.0208333	24	9	22.6124	27.1721	61.99	45.3224	16.1828
Sec61a1	0.0773691	0.0208333	24	3	22.5564	142.731	126.524	100.744	104.712
Acta1	0.0773691	0.0208333	24	18	22.5322	12.5593	11.2276	32.4712	62.3922
Ufc1	0.0773691	0.0208333	24	9	22.5291	67.7227	134.503	77.8052	56.5646
Mvd	0.0773691	0.0208333	24	12	22.2639	40.4785	61.6041	102.594	60.7479
Ddc	0.0773691	0.0208333	24	3	22.2509	52.6253	39.4067	10.1339	18.963
Mrps18c	0.0773691	0.0208333	24	6	22.1256	120.442	158.191	103.557	99.5818
Suclg1	0.0773691	0.0208333	24	6	22.1222	166.274	211.859	150.15	145.417
Nudt5	0.0773691	0.0208333	24	3	21.9994	100.003	89.7001	63.3253	64.1542
Tecr	0.0773691	0.0208333	24	12	21.9588	74.5625	134.717	148.687	127.984
Idi1	0.0773691	0.0208333	24	15	21.7791	47.085	57.0458	114.234	67.6185
Selenbp1	0.0773691	0.0208333	24	15	21.726	19.0087	33.3382	68.4804	45.3169
Snx3	0.0773691	0.0208333	24	12	21.6428	117.519	148.999	171.971	142.236
Fos	0.0773691	0.0208333	24	12	21.6293	57.7811	78.1734	138.353	75.6838
H2afz	0.0773691	0.0208333	24	3	21.5971	117.406	108.127	77.002	87.4453
Brp44l	0.0773691	0.0208333	24	15	21.4059	84.3483	95.9627	152.472	104.53
1810043H04Rik	0.0773691	0.0208333	24	9	21.3744	63.0274	110.577	70.4908	50.3388
Ces2c	0.0773691	0.0208333	24	18	21.2763	67.3685	36.5325	71.5752	92.5043
Chkb	0.0773691	0.0208333	24	12	21.1893	61.8941	88.1702	109.125	75.4686
Ang	0.0773691	0.0208333	24	3	21.1277	59.1429	58.5785	23.0559	34.9072
Ano6	0.0773691	0.0208333	24	9	20.9236	47.4702	74.2528	50.6766	18.2783
Mir719	0.0773691	0.0208333	24	18	20.8814	50.1016	37.8364	57.5236	94.844
Mrpl42	0.0773691	0.0208333	24	6	20.851	100.963	102.888	73.774	71.1016
Tmem98	0.0773691	0.0208333	24	12	20.7826	100.309	171.784	180.631	161.037
Anxa7	0.0773691	0.0208333	24	12	20.7584	24.0619	55.4294	59.4122	32.0661
Tsc22d1	0.0773691	0.0208333	24	12	20.7189	116.634	136.168	197.184	126.897
Plekhb2	0.0773691	0.0208333	24	0	20.469	146.515	115.847	106.428	133.655
Neu1	0.0773691	0.0208333	24	15	20.3721	52.535	90.157	109.364	108.322
Eno3	0.0773691	0.0208333	24	0	20.3135	47.4829	23.8995	11.0515	44.9234
Acbd4	0.0773691	0.0208333	24	9	20.2765	62.1534	106.546	73.9045	54.7876
Lass2	0.0773691	0.0208333	24	12	20.1528	83.2838	102.284	143.903	86.6903
B230312A22Rik	0.0773691	0.0208333	24	12	20.0779	49.4316	74.3147	85.2797	53.3738
Trappc2l	0.0773691	0.0208333	24	9	20.0677	74.6463	120.863	74.6474	55.7274
1110038B12Rik	0.0773691	0.0208333	24	6	20.0262	73.8471	118.442	63.8098	54.9662
Gm6793	0.0773691	0.0208333	24	0	19.9781	104.758	74.1898	67.8973	93.8357
Adh6a	0.0773691	0.0208333	24	6	19.9732	51.1676	59.6569	35.105	19.2268
Hsd17b13	0.0773691	0.0208333	24	18	19.96	10.8622	6.65158	35.9938	37.9753
Ldlr	0.0773691	0.0208333	24	15	19.9259	34.9907	48.8679	91.2766	53.777
Casp8	0.0773691	0.0208333	24	18	19.9227	85.5497	80.752	99.5353	125.686
Gpr128	0.0773691	0.0208333	24	21	19.7362	62.5025	36.38	39.6654	69.3654
Kdelr2	0.0773691	0.0208333	24	6	19.7039	132.689	145.431	118.896	103.493
Osr2	0.0773691	0.0208333	24	15	19.669	52.4829	79.3055	102.943	84.4778
Hadhb	0.0773691	0.0208333	24	0	19.6003	111.44	79.9203	69.3368	93.255
Dap	0.0773691	0.0208333	24	12	19.5683	50.3802	85.6389	95.9684	75.8797
Sdhc	0.0773691	0.0208333	24	9	19.5681	147.067	223.839	153.962	135.513
Ndufs8	0.0773691	0.0208333	24	6	19.4983	110.472	169.024	102.807	92.0888
Gnai2	0.0773691	0.0208333	24	15	19.2754	105.538	177.275	195.448	185.076
Rhod	0.0773691	0.0208333	24	9	19.2737	76.5251	99.5074	97.7793	66.2474
D17Wsu104e	0.0773691	0.0208333	24	6	19.2513	116.61	126.605	95.2735	93.4907
Psmb6	0.0773691	0.0208333	24	6	19.0017	132.482	180.274	115.893	114.567
Mmp7	0.0773691	0.0208333	24	3	18.9684	64.4045	27.7368	9.85323	12.2957
Hsd3b3	0.0773691	0.0208333	24	15	18.9513	5.64685	12.3135	48.0044	23.5583
Slc30a2	0.0773691	0.0208333	24	12	18.9416	12.7166	37.0442	49.5136	20.2664
Angptl4	0.0773691	0.0208333	24	15	18.9226	22.6822	22.7816	87.8079	40.5226
Mrpl30	0.0773691	0.0208333	24	6	18.9146	84.1438	116.8	74.843	66.3109
Mcl1	0.0773691	0.0208333	24	12	18.8885	85.6616	110.818	126.98	98.7117
2310003F16Rik	0.0773691	0.0208333	24	9	18.875	106.927	189.449	113.493	95.6975
Sri	0.0773691	0.0208333	24	12	18.8665	69.2824	98.1706	107.157	82.6827
Tmem106a	0.0773691	0.0208333	24	12	18.8087	40.1747	61.2205	75.5028	43.3496
Mvk	0.0773691	0.0208333	24	12	18.7974	15.7397	42.4458	58.6928	32.2317
Lamp2	0.0773691	0.0208333	24	3	18.6528	93.3298	69.0617	49.3395	60.2939
Nts	0.0773691	0.0208333	24	12	18.6238	36.5346	61.3276	79.2594	51.3763
Rtkn	0.0773691	0.0208333	24	12	18.5678	23.025	40.5309	70.3682	34.9849
Cox19	0.0773691	0.0208333	24	9	18.501	64.1558	101.342	71.3566	53.9137
Myo7b	0.0773691	0.0208333	24	12	18.4869	77.7591	107.211	128.519	105.682
Il18	0.0773691	0.0208333	24	9	18.4132	40.3298	70.9602	49.1392	27.6892
Litaf	0.0773691	0.0208333	24	21	18.408	108.247	90.8918	97.8606	145.157
Nars	0.0773691	0.0208333	24	0	18.3564	113.898	87.6933	73.4316	99.1465
Rpl22	0.0773691	0.0208333	24	6	18.2818	63.6687	82.3537	51.7588	42.5549
Rhou	0.0773691	0.0208333	24	12	18.2544	24.2976	43.1934	59.0033	26.2679
Actg2	0.0773691	0.0208333	24	3	18.25	93.9603	19.7639	2.55763	4.29434
Gm15315	0.0773691	0.0208333	24	3	18.1797	92.4585	17.5382	0.398176	1.06629
Itgb4	0.0773691	0.0208333	24	15	18.1728	24.6526	42.8718	72.7003	46.2245
Cd164	0.0773691	0.0208333	24	21	18.1562	70.6555	44.6999	51.3498	76.7476
Cldn15	0.0773691	0.0208333	24	9	18.0885	275.438	292.492	284.027	206.017
Tor1aip2	0.0773691	0.0208333	24	0	18.0872	94.7709	69.7787	53.6667	79.8329
Park7	0.0773691	0.0208333	24	6	18.0863	70.319	82.4695	52.0529	49.5799
St14	0.0773691	0.0208333	24	15	18.0471	108.988	130.365	147.38	143.337
Psmd8	0.0773691	0.0208333	24	9	18.0224	93.6173	130.611	102.865	85.8733
1810013D10Rik	0.0773691	0.0208333	24	9	17.9387	53.2978	82.4938	69.9955	48.4533
Cyb5r3	0.0773691	0.0208333	24	9	17.9365	61.1688	91.1646	64.8882	44.1518
Higd1a	0.0773691	0.0208333	24	12	17.8634	20.7231	42.9565	57.4325	29.1405
Fam109a	0.0773691	0.0208333	24	9	17.7953	67.2593	91.4111	78.2921	52.1112
Slc16a10	0.0773691	0.0208333	24	12	17.7627	14.322	32.8144	46.5512	14.8032
2410015M20Rik	0.0773691	0.0208333	24	6	17.7165	91.8657	132.844	83.586	75.1624
Pacsin2	0.0773691	0.0208333	24	12	17.6705	34.3169	55.9161	72.8863	44.5059
Commd1	0.0773691	0.0208333	24	9	17.6325	54.9901	95.8582	63.0459	46.4218
Xbp1	0.0773691	0.0208333	24	18	17.6317	169.21	147.196	170.831	195.445
Acta2	0.0773691	0.0208333	24	3	17.6035	103.764	25.9053	9.30859	13.517
Churc1	0.0773691	0.0208333	24	9	17.5402	47.1336	82.3482	52.7756	36.2385
Dhrs1	0.0773691	0.0208333	24	6	17.5185	53.4715	60.7617	40.143	24.5403
Tomm7	0.0773691	0.0208333	24	6	17.4927	66.122	94.0719	62.3087	48.4085
Lamtor2	0.0773691	0.0208333	24	9	17.4553	113.5	176.761	122.479	106.022
Prodh	0.0773691	0.0208333	24	12	17.4143	23.0594	46.9068	49.3739	23.9663
Adamdec1	0.0773691	0.0208333	24	21	17.3909	57.094	29.6902	47.4649	69.25
Mrpl20	0.0773691	0.0208333	24	9	17.313	101.419	122.232	111.639	83.4835
Cdk11b	0.0773691	0.0208333	24	15	17.3126	54.7119	67.0523	96.2336	74.498
Tomm22	0.0773691	0.0208333	24	6	17.2873	123.517	151.908	119.494	107.035
Cdc42se1	0.0773691	0.0208333	24	15	17.2695	49.4948	51.4274	79.1318	70.6358
Ppib	0.0773691	0.0208333	24	6	17.2523	148.074	165.231	132.783	131.725
Plin2	0.0773691	0.0208333	24	18	17.1756	50.9099	39.3397	68.5214	70.3081
F11r	0.0773691	0.0208333	24	15	17.1746	150.124	150.932	176.129	173.504
Sys1	0.0773691	0.0208333	24	12	17.1251	46.5081	68.7215	81.6834	55.4598
Ddx5	0.0773691	0.0208333	24	18	17.1233	142.331	119.677	156.309	158.475
Selm	0.0773691	0.0208333	24	9	17.1062	51.8259	82.785	66.1454	48.7209
Malat1	0.0773691	0.0208333	24	21	17.0438	49.2811	25.3771	44.8628	69.166
Gfpt1	0.0773691	0.0208333	24	21	17.0353	55.1434	35.4266	38.8523	67.3187
Psmb1	0.0773691	0.0208333	24	6	17.0215	169.627	234.14	159.027	153.579
Commd4	0.0773691	0.0208333	24	9	16.9033	57.5197	87.9557	69.1027	51.729
Arl6ip1	0.0773691	0.0208333	24	6	16.8808	148.639	171.278	140.486	131.685
Ndufv1	0.0773691	0.0208333	24	9	16.7548	83.2781	128.748	96.5909	80.7943
2310016M24Rik	0.0773691	0.0208333	24	9	16.7499	130.953	190.327	142.76	126.968
BC002163	0.0773691	0.0208333	24	9	16.7419	101.953	172.417	104.249	88.4646
Eif4a1	0.0773691	0.0208333	24	6	16.6513	177.511	180.556	155.819	155.151
Efna1	0.0773691	0.0208333	24	3	16.6029	130.199	85.6661	70.0127	77.5073
Pccb	0.0773691	0.0208333	24	9	16.5585	52.8122	80.28	60.3229	40.9562
Des	0.0773691	0.0208333	24	3	16.5389	60.0399	18.1643	2.57126	4.71454
Dsg2	0.0773691	0.0208333	24	18	16.496	70.4636	45.0597	79.4472	86.0162
Atf3	0.0773691	0.0208333	24	15	16.4201	27.9464	37.2723	56.2631	55.3987
Rras	0.0773691	0.0208333	24	12	16.4094	34.43	55.1325	72.4876	46.7774
Nsdhl	0.0773691	0.0208333	24	15	16.3357	28.5601	31.2317	60.7676	45.2284
Ptma	0.0773691	0.0208333	24	3	16.3038	174.469	111.475	96.1036	108.533
Erbb3	0.0773691	0.0208333	24	21	16.2447	34.2933	10.9339	20.6357	43.2232
Tagln	0.0773691	0.0208333	24	3	16.2036	85.5279	24.6716	9.39468	12.4482
Ndufs7	0.0773691	0.0208333	24	9	15.999	137.833	220.816	141.531	126.447
Gng12	0.0773691	0.0208333	24	15	15.8878	97.5405	109.262	131.801	119.939
Cdh17	0.0773691	0.0208333	24	12	15.8791	447.251	462.222	490.177	449.27
Pin4	0.0773691	0.0208333	24	9	15.8643	137.604	205.322	147.698	132.741
Ubl5	0.0773691	0.0208333	24	9	15.8518	68.6912	108.109	81.23	66.2848
Nedd8	0.0773691	0.0208333	24	6	15.789	211.518	285.018	210.716	196.632
Arf6	0.0773691	0.0208333	24	15	15.78	90.8625	91.6032	142.527	105.74
Ndufs2	0.0773691	0.0208333	24	6	15.7657	137.136	183.37	132.105	122.272
Eef1g	0.0773691	0.0208333	24	6	15.7646	152.535	204.225	140.565	137.672
Vegfa	0.0773691	0.0208333	24	18	15.7393	58.6807	38.5563	60.8829	80.8715
Mpdu1	0.0773691	0.0208333	24	9	15.6808	62.6642	94.0342	75.884	61.1
Plekhg6	0.0773691	0.0208333	24	12	15.5538	25.2291	47.6761	56.6338	35.0879
Metrnl	0.0773691	0.0208333	24	12	15.5334	37.9007	52.5824	70.4937	41.2403
Ctnnd1	0.0773691	0.0208333	24	21	15.4825	111.069	73.6366	106.989	121.586
Pttg1ip	0.0773691	0.0208333	24	12	15.4602	139.976	159.767	177.595	153.658
Rpn1	0.0773691	0.0208333	24	3	15.43	74.5449	71.4558	47.5219	54.8361
Pdlim2	0.0773691	0.0208333	24	12	15.3951	151.652	173.014	194.26	172.078
Magoh	0.0773691	0.0208333	24	3	15.3462	61.5501	54.0065	34.3138	37.8373
Pls1	0.0773691	0.0208333	24	18	15.3308	458.521	390.736	463.998	472.975
Mlx	0.0773691	0.0208333	24	9	15.2624	102.534	122.864	122.72	99.8815
Papss1	0.0773691	0.0208333	24	15	15.1845	32.1524	41.1185	68.7204	47.4988
Sdc1	0.0773691	0.0208333	24	15	15.15	52.0219	61.4981	81.3131	75.0577
Rnf167	0.0773691	0.0208333	24	0	15.1303	105.307	89.0193	63.2224	89.7296
Cnnm4	0.0773691	0.0208333	24	15	15.117	40.0651	43.7316	65.724	60.8301
Ndufa9	0.0773691	0.0208333	24	9	15.0453	99.9602	132.569	100.937	86.7522
Epb4.1l4b	0.0773691	0.0208333	24	15	14.8224	119.462	140.106	155.824	145.668
4933431E20Rik	0.0773691	0.0208333	24	15	14.8172	48.641	64.0505	88.7789	65.8221
Cst3	0.0773691	0.0208333	24	6	14.8026	161.742	216.894	150.932	147.786
Ndufa11	0.0773691	0.0208333	24	9	14.7758	37.3201	66.4557	48.3688	34.438
Paqr4	0.0773691	0.0208333	24	15	14.7418	34.3451	60.3287	74.2274	68.9303
Zfand2b	0.0773691	0.0208333	24	12	14.7089	31.1742	57.4818	57.8734	42.578
Polr2j	0.0773691	0.0208333	24	9	14.6714	66.9734	99.4271	77.0582	63.2259
Nlrp9b	0.0773691	0.0208333	24	21	14.628	51.1561	29.4721	31.9443	51.6344
Cyp27a1	0.0773691	0.0208333	24	12	14.5897	6.22799	19.9833	49.5554	11.6315
Gm1332	0.0773691	0.0208333	24	12	14.5838	18.5034	37.4639	44.0317	21.7431
Tmbim4	0.0773691	0.0208333	24	9	14.5459	154.592	188.139	166.017	152.303
Plin3	0.0773691	0.0208333	24	12	14.4518	223.706	250.834	262.308	248.56
Mif	0.0773691	0.0208333	24	6	14.4258	65.2088	80.8798	57.9208	47.3655
Eif4ebp1	0.0773691	0.0208333	24	12	14.3382	28.4765	47.4872	66.5956	45.0517
Cnpy2	0.0773691	0.0208333	24	9	14.3104	94.4387	120.298	97.3706	82.754
Plec	0.0773691	0.0208333	24	15	14.2619	35.2733	36.5333	56.4125	55.7329
Ckb	0.0773691	0.0208333	24	3	14.242	148.012	54.889	41.4615	48.3364
Nudt14	0.0773691	0.0208333	24	9	14.236	30.5112	57.1121	40.1775	26.5129
Tpm2	0.0773691	0.0208333	24	3	14.2151	34.3724	16.007	2.60492	3.94979
Rbck1	0.0773691	0.0208333	24	12	14.1198	44.8777	71.6265	71.6852	58.3729
4930539E08Rik	0.0773691	0.0208333	24	0	14.1108	46.2248	24.1774	19.0587	36.9227
Il13ra1	0.0773691	0.0208333	24	0	14.0481	64.5816	40.4588	38.3391	53.9503
Rnf128	0.0773691	0.0208333	24	0	13.9958	145.846	130.214	120.251	144.205
Mrps16	0.0773691	0.0208333	24	6	13.9916	61.2252	76.8712	55.4223	43.0999
Nop10	0.0773691	0.0208333	24	3	13.8794	53.1275	48.8687	30.4107	32.3285
Ifit1	0.0773691	0.0208333	24	0	13.8757	50.5198	35.2314	23.5666	47.5245
Ccni	0.0773691	0.0208333	24	15	13.8478	50.0372	54.9358	79.1729	64.9677
Idh3b	0.0773691	0.0208333	24	6	13.8469	88.2217	100.966	77.0847	72.9381
Rnf5	0.0773691	0.0208333	24	9	13.8296	93.8462	114.246	108.45	89.7338
Ugt2b34	0.0773691	0.0208333	24	12	13.796	117.631	130.638	173.036	123.06
Nat15	0.0773691	0.0208333	24	15	13.718	29.3785	29.7983	53.8191	44.158
Srebf2	0.0773691	0.0208333	24	15	13.6963	30.5154	31.5712	52.3093	48.5163
Os9	0.0773691	0.0208333	24	12	13.6861	50.6662	70.9549	72.961	54.5395
Glo1	0.0773691	0.0208333	24	9	13.5878	55.3274	79.7791	65.1635	51.183
Tns4	0.0773691	0.0208333	24	9	13.5699	10.6808	36.255	22.4496	9.64234
Gstk1	0.0773691	0.0208333	24	6	13.4892	60.5956	62.3011	46.8436	37.8999
D16H22S680E	0.0773691	0.0208333	24	12	13.425	47.6616	60.3188	90.9128	58.0192
Snx22	0.0773691	0.0208333	24	9	13.4179	68.8969	104.1	70.5259	57.8754
Wsb2	0.0773691	0.0208333	24	12	13.3706	56.2404	74.7335	89.7678	70.4431
Fam118a	0.0773691	0.0208333	24	12	13.2559	32.0613	44.5591	73.6752	32.2854
Cox6b2	0.0773691	0.0208333	24	12	13.231	20.0891	55.3882	60.0649	47.5906
Rab19	0.0773691	0.0208333	24	12	13.2054	24.1032	43.1763	50.3927	32.1152
6720456B07Rik	0.0773691	0.0208333	24	9	13.1403	101.781	123.472	107.511	92.0356
Ccdc56	0.0773691	0.0208333	24	9	13.1267	170.498	234.421	173.463	161.087
Rhoa	0.0773691	0.0208333	24	12	12.9553	138.046	156.797	163.157	145.265
1500012F01Rik	0.0773691	0.0208333	24	6	12.955	33.5685	39.0227	20.0725	15.8764
Ndufa10	0.0773691	0.0208333	24	9	12.9529	86.1594	116.999	95.2815	83.0694
Maob	0.0773691	0.0208333	24	9	12.9499	11.1738	29.4064	25.7982	7.40305
Dnajc19	0.0773691	0.0208333	24	6	12.9183	52.1066	68.5735	48.1747	35.9668
Ceacam18	0.0773691	0.0208333	24	12	12.9102	50.6254	62.7973	104.297	59.2935
Agpat1	0.0773691	0.0208333	24	12	12.91	83.4379	96.1399	117.97	94.157
Acot13	0.0773691	0.0208333	24	6	12.8946	67.8821	76.557	59.5697	48.3979
Cdk18	0.0773691	0.0208333	24	12	12.885	70.3808	86.2903	99.973	79.4383
Npm1	0.0773691	0.0208333	24	3	12.8086	78.5937	49.5168	37.4407	41.7853
Chga	0.0773691	0.0208333	24	9	12.7985	18.3539	42.1187	24.0501	11.6152
Slc25a39	0.0773691	0.0208333	24	12	12.7132	71.1991	107.087	110.503	98.5169
Psma1	0.0773691	0.0208333	24	3	12.7007	98.6169	96.1181	73.0089	85.8031
Ostf1	0.0773691	0.0208333	24	12	12.6828	91.5655	114.698	115.699	102.959
4833439L19Rik	0.0773691	0.0208333	24	12	12.6438	99.1159	118.699	126.394	110.215
Cenpv	0.0773691	0.0208333	24	9	12.5936	41.611	64.7758	46.8282	34.373
Itgb5	0.0773691	0.0208333	24	15	12.5749	35.1431	37.2234	54.6902	53.2435
Myl7	0.0773691	0.0208333	24	6	12.5726	30.599	41.0296	25.5354	10.5325
Enpp3	0.0773691	0.0208333	24	6	12.5602	23.0795	28.2218	14.205	1.57057
2010003K15Rik	0.0773691	0.0208333	24	9	12.4674	33.0779	56.4229	40.1554	28.2373
Trim40	0.0773691	0.0208333	24	18	12.4007	65.7696	57.5762	74.589	83.8312
9130404H23Rik	0.0773691	0.0208333	24	21	12.3252	51.2104	35.9358	45.7196	65.306
Jup	0.0773691	0.0208333	24	15	12.2974	56.7344	72.8285	85.4284	78.9169
Mrpl52	0.0773691	0.0208333	24	9	12.2924	105.049	203.142	105.22	93.6306
Zbtb7b	0.0773691	0.0208333	24	15	12.2756	80.8865	85.8319	106.889	94.5499
Txn2	0.0773691	0.0208333	24	6	12.2634	88.4512	96.469	80.0882	70.146
Vasp	0.0773691	0.0208333	24	12	12.252	104.598	127.158	137.367	125.273
Gchfr	0.0773691	0.0208333	24	12	12.2503	55.2891	81.8901	90.309	78.7593
Golt1a	0.0773691	0.0208333	24	9	12.2489	57.466	77.496	63.3912	48.776
Ube2a	0.0773691	0.0208333	24	12	12.1971	29.1351	44.9775	52.8375	34.1814
Hint2	0.0773691	0.0208333	24	9	12.1679	56.2569	92.2289	58.6663	47.1943
Lsm7	0.0773691	0.0208333	24	3	12.1328	37.4432	36.5349	14.9847	24.6766
Sfxn1	0.0773691	0.0208333	24	12	12.0906	55.3395	66.7386	97.5261	61.9948
Aurkaip1	0.0773691	0.0208333	24	6	12.0347	67.1267	95.1443	65.5187	55.7803
Acy3	0.0773691	0.0208333	24	9	11.9758	40.7707	52.7441	49.8771	27.9777
Fbxo6	0.0773691	0.0208333	24	12	11.9598	44.3008	61.6496	70.6646	54.1859
Pfkfb4	0.0773691	0.0208333	24	0	11.9226	68.4744	55.0058	42.2559	62.5096
Tnip1	0.0773691	0.0208333	24	12	11.8844	46.2075	57.4122	86.2198	54.5742
Naip6	0.0773691	0.0208333	24	21	11.8467	33.3686	18.6432	29.6459	48.4281
Tef	0.0773691	0.0208333	24	12	11.8176	3.71242	14.8542	31.8918	5.04184
2410006H16Rik	0.0773691	0.0208333	24	6	11.8093	35.2858	39.0795	21.7687	19.1948
Hnrnpa2b1	0.0773691	0.0208333	24	21	11.7925	103.535	90.1849	93.164	113.168
Hnrnpk	0.0773691	0.0208333	24	18	11.7424	96.8327	80.4227	102.074	108.394
Aacs	0.0773691	0.0208333	24	15	11.636	19.3103	24.3937	46.4585	30.2808
Slc25a11	0.0773691	0.0208333	24	6	11.6338	93.1303	102.236	81.4701	80.9908
Sephs2	0.0773691	0.0208333	24	6	11.5938	66.2653	69.3002	52.6085	50.1649
Hmgcl	0.0773691	0.0208333	24	9	11.5817	69.5718	98.7677	76.5934	65.6741
Bcar1	0.0773691	0.0208333	24	12	11.5669	45.4029	58.3328	75.8771	56.091
Mrpl27	0.0773691	0.0208333	24	6	11.5455	84.6881	117.363	80.4858	73.8029
Klf4	0.0773691	0.0208333	24	15	11.5347	134.652	135.73	184.602	145.527
Chchd3	0.0773691	0.0208333	24	6	11.525	84.282	92.4476	73.4778	70.6542
Igsf9	0.0773691	0.0208333	24	12	11.5192	51.626	72.9822	73.9931	62.7681
Erbb2ip	0.0773691	0.0208333	24	21	11.4989	37.0693	20.3577	28.4627	44.275
Usp2	0.0773691	0.0208333	24	12	11.4866	13.6737	28.1627	39.4291	21.429
Plcd1	0.0773691	0.0208333	24	12	11.3831	24.2622	34.9943	57.1769	32.7931
Pam16	0.0773691	0.0208333	24	9	11.3657	48.3682	67.9791	58.2564	45.7203
Csrp1	0.0773691	0.0208333	24	3	11.3055	44.1426	23.8693	13.2104	15.3761
H47	0.0773691	0.0208333	24	6	11.2761	69.2877	82.7372	65.9627	54.1685
Minos1	0.0773691	0.0208333	24	6	11.2684	50.5572	65.6212	46.6038	37.7028
Gip	0.0773691	0.0208333	24	9	11.2411	17.3518	32.5482	25.1806	8.5823
Zcchc6	0.0773691	0.0208333	24	0	11.2027	34.3881	21.2091	15.8731	34.3802
Cd55	0.0773691	0.0208333	24	15	11.1836	25.3497	40.0695	54.5306	42.5207
Swi5	0.0773691	0.0208333	24	6	11.1528	123.438	145.656	114.839	112.923
Erh	0.0773691	0.0208333	24	3	11.1237	59.6424	52.0879	37.4666	42.801
Lmo7	0.0773691	0.0208333	24	18	11.1138	46.7955	34.5408	47.5369	65.234
Hexb	0.0773691	0.0208333	24	9	11.1128	55.6841	76.1411	63.9007	52.926
Srsf2	0.0773691	0.0208333	24	6	11.0995	72.6021	82.6411	65.2492	58.5998
Oxct1	0.0773691	0.0208333	24	15	11.0614	46.4269	54.8605	69.7066	62.8673
Pla2g2a	0.0773691	0.0208333	24	3	11.04	25.106	12.6652	2.25657	3.92258
1810058I24Rik	0.0773691	0.0208333	24	9	11.0074	32.2416	52.9394	39.7942	29.3584
Numb	0.0773691	0.0208333	24	18	10.9975	24.5366	13.5935	33.2763	35.9593
Il10rb	0.0773691	0.0208333	24	15	10.9945	60.7048	65.6461	81.1941	76.2539
Trp53i13	0.0773691	0.0208333	24	12	10.982	13.6115	25.5075	36.2109	17.0452
Tmem208	0.0773691	0.0208333	24	6	10.9612	68.281	84.5273	65.0853	56.72
Ube2l6	0.0773691	0.0208333	24	9	10.9506	62.6342	83.8434	67.6451	57.3208
H1f0	0.0773691	0.0208333	24	9	10.9477	53.5896	65.9687	65.599	47.0133
Inpp5a	0.0773691	0.0208333	24	12	10.917	20.8989	31.1915	49.5994	26.9169
Ap1s1	0.0773691	0.0208333	24	9	10.9095	105.022	146.988	106.821	96.5354
1110059E24Rik	0.0773691	0.0208333	24	0	10.8973	50.841	37.792	29.7306	47.5037
Ttyh3	0.0773691	0.0208333	24	15	10.8888	16.9348	22.5996	39.5707	30.7619
Hint3	0.0773691	0.0208333	24	9	10.856	30.044	46.85	40.0049	26.1055
Tspan31	0.0773691	0.0208333	24	9	10.8366	61.4686	80.9627	65.7073	54.5509
Ptdss1	0.0773691	0.0208333	24	6	10.8305	61.2213	68.2983	52.1684	46.7178
Msra	0.0773691	0.0208333	24	9	10.8037	65.966	78.0227	75.1746	56.6738
Glrx5	0.0773691	0.0208333	24	9	10.7936	37.3586	61.8685	45.9105	35.7342
Timm23	0.0773691	0.0208333	24	3	10.78	69.0719	61.9919	48.6072	51.9661
Cobl	0.0773691	0.0208333	24	15	10.7668	23.3971	35.4024	51.769	37.4835
Ctnna1	0.0773691	0.0208333	24	15	10.7445	152.925	162.819	179.626	166.508
Tmem8	0.0773691	0.0208333	24	12	10.715	70.445	85.5215	91.8955	76.6653
Apol7a	0.0773691	0.0208333	24	21	10.714	95.4497	64.8264	86.8986	96.9999
Akr1c12	0.0773691	0.0208333	24	15	10.7105	49.013	58.8848	89.2815	59.111
Eps8	0.0773691	0.0208333	24	21	10.6136	62.0838	50.1389	61.9646	80.0396
Ddost	0.0773691	0.0208333	24	6	10.5748	117.39	120.802	104.148	104.134
Tmem205	0.0773691	0.0208333	24	9	10.4911	57.0394	81.0813	62.8543	52.9632
Rps15a	0.0773691	0.0208333	24	6	10.4867	31.453	41.1819	22.9964	19.9776
Igbp1	0.0773691	0.0208333	24	9	10.4588	46.4035	64.9671	52.1373	41.119
Bco2	0.0773691	0.0208333	24	6	10.4548	33.494	41.4103	25.5029	19.8308
Ppp2r5d	0.0773691	0.0208333	24	12	10.4473	45.4274	67.1135	69.4658	59.616
Stk17b	0.0773691	0.0208333	24	15	10.4133	35.8574	37.339	54.8681	47.7815
Tuba1c	0.0773691	0.0208333	24	6	10.4061	49.6341	64.0297	47.9205	36.3104
Gbp8	0.0773691	0.0208333	24	21	10.3927	23.8486	10.489	14.3229	30.3584
A2ld1	0.0773691	0.0208333	24	3	10.3624	54.7046	51.4788	34.1215	42.7525
Dpy30	0.0773691	0.0208333	24	6	10.352	44.2869	48.928	32.3128	31.6222
Akr1c13	0.0773691	0.0208333	24	12	10.3444	49.9139	59.6667	120.264	55.9979
Ivns1abp	0.0773691	0.0208333	24	21	10.3371	46.1953	30.1236	33.2982	46.4643
Arl8a	0.0773691	0.0208333	24	15	10.3282	35.236	41.9575	56.689	49.717
Polr2f	0.0773691	0.0208333	24	9	10.3258	73.6676	111.138	79.9372	70.2019
Rab11fip3	0.0773691	0.0208333	24	12	10.3199	29.4313	42.9891	51.8436	36.2123
Psmb5	0.0773691	0.0208333	24	6	10.2844	90.1514	115.769	81.2726	80.4552
Aip	0.0773691	0.0208333	24	12	10.2827	21.7527	37.3209	39.7737	26.2581
Iscu	0.0773691	0.0208333	24	6	10.2793	51.398	66.6995	48.019	41.0043
Aspscr1	0.0773691	0.0208333	24	9	10.2662	37.3538	58.6436	46.8991	37.22
Crat	0.0773691	0.0208333	24	12	10.1916	19.5816	29.8229	42.1562	23.5714
Lss	0.0773691	0.0208333	24	15	10.1848	12.4116	15.6706	44.1713	22.0139
Sema3b	0.0773691	0.0208333	24	12	10.1372	25.4176	35.2094	45.8084	26.9278
Cyb561	0.0773691	0.0208333	24	12	10.1249	41.6138	55.3414	57.9542	43.0442
Mrpl13	0.0773691	0.0208333	24	6	10.0569	34.2385	40.5157	24.4678	21.8411
Gm12669	0.0773691	0.0208333	24	21	10.0489	18.4608	0	10.7985	20.7603
Cml5	0.0773691	0.0208333	24	15	10.0405	5.68648	11.1431	49.7128	15.1528
Tmem50b	0.0773691	0.0208333	24	21	10.0119	46.8175	30.471	36.9039	48.8753
Bak1	0.0773691	0.0208333	24	12	10.0041	130.153	179.828	183.825	174.393
Cyp4f13	0.0773691	0.0208333	24	12	10.0037	43.3235	61.6237	62.1373	52.1428
Slc5a4b	0.0773691	0.0208333	24	6	9.98537	39.5474	39.9811	30.5668	6.35199
Fam132a	0.0773691	0.0208333	24	9	9.95306	37.3914	54.6198	44.3359	33.4128
Nme1	0.0773691	0.0208333	24	6	9.94051	38.4693	47.3963	32.0294	25.7202
Beta-s	0.0773691	0.0208333	24	3	9.92959	31.1307	17.0126	7.65089	9.75651
Cd81	0.0773691	0.0208333	24	0	9.91477	55.8408	38.1808	31.2412	41.6244
Nuak2	0.0773691	0.0208333	24	18	9.87719	62.1157	59.9374	72.2493	77.7407
Eif3e	0.0773691	0.0208333	24	3	9.84056	45.6441	41.0404	28.7806	30.0706
Sec11a	0.0773691	0.0208333	24	3	9.80499	73.2241	58.9562	49.6716	54.776
Anxa11	0.0773691	0.0208333	24	15	9.78692	64.773	88.4757	97.7029	92.0596
Dtx3l	0.0773691	0.0208333	24	21	9.77865	27.886	18.6666	21.1104	40.8735
Gstp1	0.0773691	0.0208333	24	15	9.76974	157.619	199.196	208.407	201.285
Ppp1r14b	0.0773691	0.0208333	24	6	9.74641	49.6197	63.5928	44.8192	40.4307
Asah2	0.0773691	0.0208333	24	9	9.70271	43.5926	52.7404	48.7203	17.2445
Stmn1	0.0773691	0.0208333	24	3	9.69602	41.2296	23.3788	14.2373	14.2622
Tmcc3	0.0773691	0.0208333	24	21	9.67488	33.6073	19.4574	30.0775	43.2923
Dsp	0.0773691	0.0208333	24	18	9.66382	26.4216	17.3613	30.1072	41.0091
Pla2g12b	0.0773691	0.0208333	24	9	9.6361	129.366	191.915	135.567	126.482
Sphk2	0.0773691	0.0208333	24	9	9.61612	20.6375	34.1248	32.0373	18.3261
Abhd4	0.0773691	0.0208333	24	0	9.57278	52.2609	34.4663	30.4095	39.6908
Edn3	0.0773691	0.0208333	24	12	9.52303	28.4276	37.406	65.4237	28.8942
Srp9	0.0773691	0.0208333	24	6	9.48082	55.7192	69.4682	52.6762	45.6954
Med11	0.0773691	0.0208333	24	9	9.47947	32.9503	50.7953	40.7559	31.7889
Tmem82	0.0773691	0.0208333	24	9	9.47106	22.5246	38.9601	32.4504	22.0977
Ak3	0.0773691	0.0208333	24	18	9.45352	76.7998	70.4077	83.6869	90.2592
Adamtsl5	0.0773691	0.0208333	24	15	9.45282	20.2587	32.2587	45.1012	34.1528
Mapre3	0.0773691	0.0208333	24	15	9.43457	19.1123	27.2529	45.7527	28.0073
B4galt5	0.0773691	0.0208333	24	12	9.42534	30.9573	39.8436	59.0236	37.496
Qars	0.0773691	0.0208333	24	6	9.41707	74.1473	81.7781	66.5003	62.7896
Gucy2c	0.0773691	0.0208333	24	12	9.39547	58.9858	73.3179	83.3191	71.0768
Gm13363	0.0773691	0.0208333	24	18	9.35128	18.3779	13.4174	26.5865	31.6582
Fxyd3	0.0773691	0.0208333	24	9	9.35057	37.8173	54.7449	39.1455	29.6257
Acot9	0.0773691	0.0208333	24	12	9.29492	23.69	41.0012	43.4738	34.495
Mrpl18	0.0773691	0.0208333	24	6	9.2561	56.4635	59.0673	46.0245	43.3261
Timm17a	0.0773691	0.0208333	24	6	9.24185	53.1072	64.5429	50.4567	41.0535
Coq7	0.0773691	0.0208333	24	9	9.24097	27.2536	42.5147	31.1921	20.3158
5730437N04Rik	0.0773691	0.0208333	24	6	9.20529	37.9705	44.3213	29.848	26.4073
Tm7sf2	0.0773691	0.0208333	24	15	9.19585	50.9691	59.2729	69.0128	67.239
Tmem50a	0.0773691	0.0208333	24	9	9.15583	57.3657	76.8856	63.3714	54.7392
Atp6v1d	0.0773691	0.0208333	24	12	9.13755	38.3981	51.4248	55.9758	43.1576
Gdi2	0.0773691	0.0208333	24	9	9.12062	138.289	167.152	143.606	135.007
Tmem117	0.0773691	0.0208333	24	6	9.104	35.6643	49.4707	35.2344	24.1506
Fh1	0.0773691	0.0208333	24	6	9.0871	44.5496	49.7264	35.182	33.3918
Nudt9	0.0773691	0.0208333	24	12	9.03594	27.037	38.7922	42.4475	28.6452
Suv420h2	0.0773691	0.0208333	24	15	8.97997	34.0239	41.4474	58.9768	42.4903
Actr3	0.0773691	0.0208333	24	21	8.97849	189.224	145.484	183.495	191.96
Deb1	0.0773691	0.0208333	24	9	8.96926	31.0062	43.8764	35.0252	22.5265
Sdccag3	0.0773691	0.0208333	24	15	8.94791	36.6276	43.5615	60.3695	45.1281
Pnrc2	0.0773691	0.0208333	24	21	8.92846	36.1998	24.0163	24.133	37.203
Agmo	0.0773691	0.0208333	24	18	8.92213	22.1891	17.9477	32.596	32.7764
Mknk2	0.0773691	0.0208333	24	15	8.90269	18.7224	23.5748	37.6334	29.8444
Dsc2	0.0773691	0.0208333	24	18	8.89936	41.7864	27.0768	43.962	50.1768
Tspan13	0.0773691	0.0208333	24	15	8.89427	57.7449	65.2695	105.109	66.1305
Ccnl2	0.0773691	0.0208333	24	12	8.88416	56.0376	65.6877	76.8992	61.4211
3300005D01Rik	0.0773691	0.0208333	24	12	8.84686	15.7929	24.1338	43.7476	21.0408
Cdk16	0.0773691	0.0208333	24	12	8.8249	40.3288	54.7939	58.5784	48.0829
Epha1	0.0773691	0.0208333	24	9	8.82328	24.0379	36.609	35.3912	23.0063
2900026A02Rik	0.0773691	0.0208333	24	15	8.79733	43.1429	45.5628	59.9929	53.5954
Pdgfa	0.0773691	0.0208333	24	12	8.79019	21.3824	31.532	39.5158	24.803
Rhebl1	0.0773691	0.0208333	24	6	8.76098	28.4087	35.0611	21.328	17.362
Klf6	0.0773691	0.0208333	24	18	8.75557	44.0352	40.9043	53.0264	56.6776
Ralb	0.0773691	0.0208333	24	12	8.7438	36.3859	45.0023	53.8852	37.7704
Sidt2	0.0773691	0.0208333	24	12	8.72531	44.2336	54.5432	66.0531	51.6838
Spcs1	0.0773691	0.0208333	24	9	8.71438	91.8847	102.868	92.8844	79.2197
Sox13	0.0773691	0.0208333	24	15	8.70943	30.9177	36.4503	49.9411	42.0609
Blmh	0.0773691	0.0208333	24	12	8.70664	19.6705	37.7243	39.1114	30.9027
Mrpl53	0.0773691	0.0208333	24	6	8.68133	66.6935	78.7517	65.4914	55.3993
Cyp3a25	0.0773691	0.0208333	24	3	8.68065	139.104	55.1942	47.01	54.0317
Fhl1	0.0773691	0.0208333	24	18	8.62145	14.5602	8.71937	20.6492	27.0155
Chpt1	0.0773691	0.0208333	24	12	8.61344	14.5033	22.9079	31.5372	15.5793
Pabpc1	0.0773691	0.0208333	24	0	8.59241	124.275	116.174	101.233	118.374
4930420K17Rik	0.0773691	0.0208333	24	15	8.56791	61.0078	74.5978	83.1897	76.6496
2510039O18Rik	0.0773691	0.0208333	24	12	8.52898	47.3526	58.9417	67.1859	54.6514
Ube2c	0.0773691	0.0208333	24	3	8.50941	29.0994	17.714	9.69125	11.6454
Ranbp1	0.0773691	0.0208333	24	3	8.48807	40.7861	37.7048	23.9522	30.5308
Ddx3x	0.0773691	0.0208333	24	21	8.45392	33.1581	18.1748	26.2569	35.1849
Pkig	0.0773691	0.0208333	24	12	8.44261	43.6373	56.9359	57.3217	46.741
Glul	0.0773691	0.0208333	24	15	8.43812	13.2614	16.008	28.4334	24.7026
Gsdmc4	0.0773691	0.0208333	24	6	8.41146	30.0231	32.0027	24.0505	14.1841
Caprin1	0.0773691	0.0208333	24	21	8.36504	29.1306	15.2768	19.4724	29.2785
Tesk2	0.0773691	0.0208333	24	12	8.35153	15.3011	23.7007	37.7175	22.4954
Acaa2	0.0773691	0.0208333	24	9	8.33382	45.6705	54.923	46.6008	32.2817
Fcf1	0.0773691	0.0208333	24	6	8.32378	45.4183	51.1546	36.7108	36.3189
Eif3i	0.0773691	0.0208333	24	6	8.30497	58.5755	87.5692	57.1474	50.7455
Abhd16a	0.0773691	0.0208333	24	9	8.26357	19.5539	33.9318	27.2938	18.2988
Tomm6	0.0773691	0.0208333	24	9	8.25925	56.1218	106.468	59.2843	51.4974
Gm2061	0.0773691	0.0208333	24	0	8.23847	20.4999	9.89199	5.44279	18.1368
Arl4d	0.0773691	0.0208333	24	9	8.21149	22.2543	32.2823	32.215	19.0174
Myh9	0.0773691	0.0208333	24	18	8.20544	36.9508	33.5858	42.0407	51.7044
Tbx3	0.0773691	0.0208333	24	12	8.18649	32.7396	40.4579	50.9181	33.9803
Hpcal1	0.0773691	0.0208333	24	15	8.17992	24.0212	36.3909	44.103	40.4361
Gmppb	0.0773691	0.0208333	24	9	8.17369	43.9541	55.9655	47.4298	36.3225
Dhcr7	0.0773691	0.0208333	24	15	8.1615	16.3193	18.7674	30.4424	27.7285
Idh2	0.0773691	0.0208333	24	12	8.16005	25.3699	38.0861	40.6211	30.2572
B4galt6	0.0773691	0.0208333	24	12	8.15004	10.284	21.6744	22.169	10.5076
Hbxip	0.0773691	0.0208333	24	9	8.13951	58.0149	73.2251	64.4706	56.6588
Trib1	0.0773691	0.0208333	24	15	8.13487	16.8509	17.9009	29.9684	27.7923
Sc5d	0.0773691	0.0208333	24	15	8.08817	59.2167	63.124	80.7298	66.8423
1110001J03Rik	0.0773691	0.0208333	24	9	8.08806	49.8348	90.511	51.8654	44.2399
Vat1	0.0773691	0.0208333	24	12	8.06629	46.1356	57.1217	65.7429	53.9141
C2cd2l	0.0773691	0.0208333	24	12	8.05419	33.5958	44.7294	55.3331	43.686
Cst6	0.0773691	0.0208333	24	6	8.05243	43.4545	56.4708	38.8056	35.8626
Capza2	0.0773691	0.0208333	24	21	8.03913	72.3738	58.9136	72.2189	81.4968
Eci1	0.0773691	0.0208333	24	9	8.02648	35.6285	49.7186	37.7036	29.0914
1110002B05Rik	0.0773691	0.0208333	24	9	8.00827	74.4966	85.9221	82.2404	71.0151
0610011F06Rik	0.0773691	0.0208333	24	9	7.99642	38.635	57.8705	41.4378	33.8987
Ppp1cc	0.0773691	0.0208333	24	15	7.99335	54.2797	56.2853	72.6674	61.8159
Rbm3	0.0773691	0.0208333	24	9	7.93925	53.0599	60.5451	58.8988	39.3215
Lipe	0.0773691	0.0208333	24	9	7.93696	39.9967	49.2049	47.3785	34.1376
Adipor1	0.0773691	0.0208333	24	12	7.90393	73.1203	89.0191	95.6647	88.2128
Lyz2	0.0773691	0.0208333	24	3	7.88799	39.9133	38.1821	23.9713	31.8135
Pon2	0.0773691	0.0208333	24	9	7.84181	56.5614	65.3129	64.6432	51.2147
P2ry2	0.0773691	0.0208333	24	12	7.83987	12.8841	20.2756	50.8097	19.6906
2700060E02Rik	0.0773691	0.0208333	24	6	7.80614	67.5447	90.816	65.0409	60.185
Tmem85	0.0773691	0.0208333	24	6	7.79659	46.917	53.8658	39.4437	39.287
Dbp	0.0773691	0.0208333	24	12	7.78533	0.220374	8.50713	14.2658	0.532305
Ptbp1	0.0773691	0.0208333	24	0	7.76856	60.6431	50.615	48.6964	60.6411
Nampt	0.0773691	0.0208333	24	15	7.74303	14.3799	14.4184	30.0716	21.6801
Scpep1	0.0773691	0.0208333	24	12	7.70637	28.7659	41.8095	49.0815	40.3282
Tubb2a	0.0773691	0.0208333	24	15	7.70304	13.7196	13.7626	45.2732	20.9821
Abcg5	0.0773691	0.0208333	24	0	7.68873	146.219	138.97	94.8837	143.644
Nckap1	0.0773691	0.0208333	24	18	7.6649	21.9019	11.6098	25.1675	30.0238
Rdh9	0.0773691	0.0208333	24	9	7.66118	45.1167	54.5101	50.6032	38.3275
Sesn1	0.0773691	0.0208333	24	9	7.65242	37.5471	49.6973	39.032	29.5379
Flnb	0.0773691	0.0208333	24	15	7.63877	25.4712	25.5177	40.2284	32.6731
Clic5	0.0773691	0.0208333	24	18	7.62286	70.8083	65.4441	72.631	86.885
Kcnk5	0.0773691	0.0208333	24	12	7.61957	25.861	33.1753	46.0633	31.8262
Hspa9	0.0773691	0.0208333	24	3	7.61883	48.8863	34.2944	27.1113	30.2563
Nlrp6	0.0773691	0.0208333	24	6	7.61589	59.1136	72.1406	58.6546	51.0586
Cyp4f40	0.0773691	0.0208333	24	18	7.61299	43.0726	34.9128	45.5249	53.9933
Bmp2	0.0773691	0.0208333	24	12	7.60304	7.51475	15.3857	26.1088	12.4751
Stt3a	0.0773691	0.0208333	24	3	7.57842	64.6427	49.2861	42.1411	48.0919
Plbd1	0.0773691	0.0208333	24	6	7.5712	50.9415	72.5928	50.4841	43.8033
Slc9a3	0.0773691	0.0208333	24	21	7.56987	11.2417	2.05562	2.86706	15.0918
Atp2a3	0.0773691	0.0208333	24	12	7.56951	34.9216	42.0582	60.2865	39.1922
Mtap7	0.0773691	0.0208333	24	21	7.56378	29.6191	20.6008	22.4072	34.7825
Ypel5	0.0773691	0.0208333	24	9	7.55848	21.5965	31.1753	29.6082	17.8084
AI462493	0.0773691	0.0208333	24	9	7.55095	14.7164	30.5771	19.5686	12.4495
Gm239	0.0773691	0.0208333	24	15	7.51948	25.5571	31.1311	42.689	35.2675
Vps4a	0.0773691	0.0208333	24	12	7.50375	25.2218	38.3956	39.8438	31.7938
Eif3m	0.0773691	0.0208333	24	3	7.50223	37.955	35.048	25.0873	26.6962
Atxn2l	0.0773691	0.0208333	24	18	7.49261	19.4679	14.7928	24.7939	30.6591
Cfdp1	0.0773691	0.0208333	24	3	7.46174	32.5329	29.7157	18.1397	23.0039
Ppfia3	0.0773691	0.0208333	24	15	7.45365	16.5267	26.6778	37.471	26.8156
Aldh18a1	0.0773691	0.0208333	24	0	7.44594	31.5037	15.6142	12.1925	19.2126
Ugt1a1	0.0773691	0.0208333	24	18	7.38386	17.49	10.3431	24.1498	24.568
0610010K14Rik	0.0773691	0.0208333	24	9	7.33309	20.6881	32.167	22.0972	12.835
Plvap	0.0773691	0.0208333	24	15	7.33107	21.9823	36.0591	42.9709	39.6565
Rps6ka4	0.0773691	0.0208333	24	12	7.31806	13.7177	26.4684	31.2613	23.3134
Plekhg2	0.0773691	0.0208333	24	15	7.31474	11.0921	11.6309	23.3025	20.1097
Tceb1	0.0773691	0.0208333	24	9	7.29858	46.0045	58.1285	46.3608	37.8413
Immt	0.0773691	0.0208333	24	6	7.24714	60.5177	60.7597	51.5376	49.2418
Myadm	0.0773691	0.0208333	24	21	7.23112	31.2088	20.8697	22.9083	33.0219
Ptrh1	0.0773691	0.0208333	24	12	7.22988	19.435	26.2514	50.838	20.3871
Calu	0.0773691	0.0208333	24	3	7.22097	39.1461	29.0101	22.2021	25.504
Pfdn1	0.0773691	0.0208333	24	9	7.21334	57.6247	78.0249	59.4816	52.6808
Dcaf15	0.0773691	0.0208333	24	12	7.2062	29.1073	39.498	40.295	30.3035
1110003E01Rik	0.0773691	0.0208333	24	9	7.20188	30.6852	41.0034	37.1363	27.0845
Trim12a	0.0773691	0.0208333	24	9	7.19626	18.6514	43.1407	20.6315	13.8468
Sgpp2	0.0773691	0.0208333	24	21	7.19449	36.7585	24.8007	28.5521	36.9434
Emg1	0.0773691	0.0208333	24	3	7.18456	52.7333	40.5018	33.1708	39.7433
Gtf3c6	0.0773691	0.0208333	24	9	7.16875	17.21	29.5307	23.7342	15.7786
Mif4gd	0.0773691	0.0208333	24	12	7.15574	29.9013	48.7183	52.052	45.3055
Gclm	0.0773691	0.0208333	24	18	7.14726	49.9634	31.953	55.08	56.7019
Slc5a4a	0.0773691	0.0208333	24	9	7.12934	5.73046	14.9404	13.6928	2.73791
Rab2a	0.0773691	0.0208333	24	9	7.11031	66.0919	77.7074	67.9156	59.4201
Myo18a	0.0773691	0.0208333	24	15	7.07421	23.2371	29.1745	37.0936	35.3269
Spcs2	0.0773691	0.0208333	24	3	7.0309	44.6674	36.9793	30.3505	31.1574
C1qbp	0.0773691	0.0208333	24	3	7.03009	30.6213	23.5926	15.8465	18.4833
0610040J01Rik	0.0773691	0.0208333	24	12	7.02532	28.0706	36.7318	44.0244	32.815
Cct2	0.0773691	0.0208333	24	3	7.01217	58.6476	58.293	47.7533	49.3539
Nt5e	0.0773691	0.0208333	24	12	6.99872	6.95234	15.8617	21.8869	11.0009
Pcbd2	0.0773691	0.0208333	24	9	6.98816	23.4171	34.3602	29.2455	20.4231
Stra13	0.0773691	0.0208333	24	6	6.98795	41.5459	47.2028	37.264	31.7198
0610009D07Rik	0.0773691	0.0208333	24	9	6.97861	48.0805	65.6445	52.0313	45.4518
Faah	0.0773691	0.0208333	24	15	6.97596	27.1887	33.507	67.0329	33.7657
Iyd	0.0773691	0.0208333	24	15	6.9622	7.29556	9.91576	23.0316	13.8718
Sema6d	0.0773691	0.0208333	24	21	6.94159	9.92314	3.37855	4.69992	19.3243
BC056474	0.0773691	0.0208333	24	9	6.93884	47.4261	65.6353	48.3989	41.8569
Usp37	0.0773691	0.0208333	24	9	6.92173	19.2279	28.786	27.818	17.7985
Uqcrc2	0.0773691	0.0208333	24	6	6.89535	166.733	176.506	164.684	159.052
Sft2d1	0.0773691	0.0208333	24	6	6.89093	47.7275	51.6091	42.6794	37.1667
Psma3	0.0773691	0.0208333	24	3	6.86919	85.4719	81.9497	73.7596	74.233
D330041H03Rik	0.0773691	0.0208333	24	9	6.86809	13.5386	35.7675	17.7008	11.2255
2900010M23Rik	0.0773691	0.0208333	24	6	6.86311	81.5992	121.944	76.812	75.1286
Ociad2	0.0773691	0.0208333	24	9	6.85904	35.2797	45.2661	40.9812	31.5673
Trpm4	0.0773691	0.0208333	24	12	6.85759	57.9674	78.6844	82.3221	75.8567
Rnaseh2c	0.0773691	0.0208333	24	6	6.85703	22.6376	24.0436	13.9823	13.3043
Ovol1	0.0773691	0.0208333	24	9	6.85024	17.4154	26.9535	26.8368	16.9995
Atp6v0c	0.0773691	0.0208333	24	18	6.83818	22.464	17.1201	24.8001	34.1253
Tmem219	0.0773691	0.0208333	24	9	6.83397	24.8021	34.6256	34.2845	24.7786
Nr0b2	0.0773691	0.0208333	24	3	6.82703	18.5614	9.09966	0.814677	7.53664
Tram1	0.0773691	0.0208333	24	6	6.81633	40.267	43.2661	34.9106	29.343
Nhp2	0.0773691	0.0208333	24	6	6.80696	19.3855	20.998	11.0048	10.1257
Jtb	0.0773691	0.0208333	24	6	6.80223	43.3515	51.0604	42.1686	33.0037
Lmbr1l	0.0773691	0.0208333	24	9	6.79862	37.3526	50.0817	41.6576	35.1573
Aqp11	0.0773691	0.0208333	24	12	6.79434	23.9362	34.7907	40.6653	32.3025
Man2b2	0.0773691	0.0208333	24	12	6.79388	10.8836	22.5663	26.7039	19.1706
Rars	0.0773691	0.0208333	24	0	6.79353	53.8056	47.4006	32.0206	48.4943
Ube2q1	0.0773691	0.0208333	24	12	6.79339	41.0412	48.4984	54.6607	42.9033
Arf3	0.0773691	0.0208333	24	18	6.78773	49.1477	46.7783	53.8572	61.2674
Ssfa2	0.0773691	0.0208333	24	18	6.73763	19.0656	13.6397	24.0595	27.7027
Cyp2c65	0.0773691	0.0208333	24	6	6.7249	37.2038	38.25	31.9097	20.3905
Klf10	0.0773691	0.0208333	24	18	6.70525	13.8031	12.1544	20.6627	24.2601
AA465934	0.0773691	0.0208333	24	9	6.68968	9.09529	17.1362	14.7814	3.90104
Dnajc15	0.0773691	0.0208333	24	6	6.68481	34.2923	51.0605	31.9677	27.9898
Cat	0.0773691	0.0208333	24	18	6.68262	59.5636	50.4203	60.4264	68.4588
Bcmo1	0.0773691	0.0208333	24	15	6.67756	2.37022	4.67935	32.0509	8.66588
Ctsl	0.0773691	0.0208333	24	15	6.67325	23.3394	23.3667	34.5421	31.0388
Mcee	0.0773691	0.0208333	24	9	6.66735	22.2016	31.34	27.4517	17.732
Coq5	0.0773691	0.0208333	24	0	6.66416	23.16	11.1174	10.7197	17.5262
Eapp	0.0773691	0.0208333	24	9	6.66349	34.9596	48.2694	39.0608	32.7784
Tubal3	0.0773691	0.0208333	24	9	6.66141	34.8993	45.7286	41.2265	33.2145
P2rx4	0.0773691	0.0208333	24	9	6.64023	28.3157	35.9541	34.6834	23.5404
Commd3	0.0773691	0.0208333	24	6	6.63659	49.2906	54.2986	44.3424	40.4757
Cnn1	0.0773691	0.0208333	24	3	6.619	28.1683	7.07445	0.833993	1.72581
Itga3	0.0773691	0.0208333	24	12	6.60876	33.018	47.3092	53.4515	47.2207
Trak1	0.0773691	0.0208333	24	15	6.59487	18.712	21.1686	34.275	24.9297
2023-03-02	0.0773691	0.0208333	24	12	6.55569	26.3226	38.116	39.2218	32.4729
Ccdc107	0.0773691	0.0208333	24	9	6.55244	40.7578	72.5282	46.4567	40.279
Glrx3	0.0773691	0.0208333	24	6	6.55233	23.3568	38.5103	18.7061	17.1792
Tbc1d20	0.0773691	0.0208333	24	18	6.53925	22.8431	13.5257	24.6259	30.2387
Bcar3	0.0773691	0.0208333	24	15	6.52981	25.0859	27.1855	38.1585	32.582
Gdi1	0.0773691	0.0208333	24	12	6.5237	31.2942	39.1084	49.1639	38.5263
2900053A13Rik	0.0773691	0.0208333	24	9	6.50991	27.0671	46.242	30.9985	24.8609
Capza1	0.0773691	0.0208333	24	21	6.5027	59.7076	48.8732	53.3053	60.8633
Fabp5	0.0773691	0.0208333	24	9	6.48057	5.21577	15.9638	11.8182	4.23641
Ptpla	0.0773691	0.0208333	24	6	6.47611	20.192	24.9671	15.4006	11.4413
Commd9	0.0773691	0.0208333	24	6	6.47558	20.594	27.2269	15.1949	14.3103
Lsm5	0.0773691	0.0208333	24	3	6.45631	21.8562	12.7621	5.50509	10.852
Aamp	0.0773691	0.0208333	24	6	6.45444	70.4992	95.6872	65.125	64.4139
Prr14	0.0773691	0.0208333	24	15	6.42926	32.9767	37.5405	44.6383	44.0636
Pole3	0.0773691	0.0208333	24	6	6.41183	26.4525	27.1243	18.2389	17.2025
Grb7	0.0773691	0.0208333	24	0	6.40943	56.5475	50.2869	41.381	53.249
Txndc11	0.0773691	0.0208333	24	9	6.40805	26.269	35.7142	33.0309	24.3514
Pex11a	0.0773691	0.0208333	24	18	6.40457	13.5048	8.14574	18.9744	20.791
Snhg6	0.0773691	0.0208333	24	6	6.395	17.8091	22.2652	11.4578	10.5287
Parl	0.0773691	0.0208333	24	9	6.3856	26.0197	35.6324	28.381	19.9325
Atp2b1	0.0773691	0.0208333	24	15	6.37496	15.4931	24.168	33.0936	24.5986
M6pr	0.0773691	0.0208333	24	0	6.36216	66.2042	52.5577	48.8257	54.824
AU040320	0.0773691	0.0208333	24	9	6.332	48.3273	55.7717	52.979	42.5138
Eme1	0.0773691	0.0208333	24	6	6.32822	23.3125	35.6827	22.0032	17.3462
Pde6d	0.0773691	0.0208333	24	12	6.31114	16.6648	25.273	27.1403	17.8979
Irgm1	0.0773691	0.0208333	24	12	6.28289	32.7393	43.2896	48.3708	41.1504
Gramd3	0.0773691	0.0208333	24	21	6.26606	43.3964	33.9222	35.7096	43.9585
Ddit3	0.0773691	0.0208333	24	6	6.26521	42.5482	62.3002	40.9462	36.6413
Stx7	0.0773691	0.0208333	24	18	6.26083	39.469	30.2564	41.1998	46.2339
Nbr1	0.0773691	0.0208333	24	21	6.25977	37.8233	30.2374	31.7862	41.9056
Rbm47	0.0773691	0.0208333	24	12	6.24209	37.3587	43.2438	51.4374	38.3908
Bud31	0.0773691	0.0208333	24	6	6.24061	59.328	75.8355	58.1107	53.4443
Cyp2c55	0.0773691	0.0208333	24	6	6.24025	21.1026	29.0122	20.2963	12.1684
As3mt	0.0773691	0.0208333	24	6	6.23986	19.7709	31.7614	19.0105	13.8879
Znrd1	0.0773691	0.0208333	24	6	6.23477	33.49	40.6454	30.9819	25.5189
Ifitm2	0.0773691	0.0208333	24	0	6.23011	70.2119	45.4215	41.4347	47.3085
Bcl10	0.0773691	0.0208333	24	15	6.2195	33.5028	34.6998	47.2726	39.3666
Cnih4	0.0773691	0.0208333	24	9	6.19786	19.7172	28.1851	26.1238	17.0615
Uap1l1	0.0773691	0.0208333	24	9	6.19638	46.7057	79.9002	48.3662	42.5242
Eif4g2	0.0773691	0.0208333	24	21	6.1915	46.2142	31.0142	41.5956	47.433
Slc46a1	0.0773691	0.0208333	24	3	6.1827	34.9191	15.7579	9.92879	13.2603
Get4	0.0773691	0.0208333	24	9	6.17983	22.4191	36.3916	26.9353	21.1089
Copa	0.0773691	0.0208333	24	0	6.17976	77.8734	67.4828	65.9411	73.0295
Chmp3	0.0773691	0.0208333	24	12	6.1671	55.2321	64.4427	65.8669	57.6343
Hectd3	0.0773691	0.0208333	24	12	6.15918	32.5694	43.6015	43.6267	37.238
2810422J05Rik	0.0773691	0.0208333	24	9	6.15402	32.9825	44.5681	38.6507	32.8301
Endog	0.0773691	0.0208333	24	12	6.15222	4.91113	10.7115	21.3446	7.88408
A130040M12Rik	0.0773691	0.0208333	24	21	6.14989	20.4995	9.43359	20.3233	26.6519
Mrpl48	0.0773691	0.0208333	24	9	6.14547	33.8122	55.0618	34.0082	28.2142
Srp68	0.0773691	0.0208333	24	12	6.14465	27.8428	35.5836	40.9125	31.2736
9430038I01Rik	0.0773691	0.0208333	24	9	6.13408	23.069	32.2875	28.0758	19.9445
Apba3	0.0773691	0.0208333	24	12	6.13252	25.7923	31.5741	44.7842	27.6127
Snrpd3	0.0773691	0.0208333	24	3	6.12004	73.3252	68.7295	57.2559	67.4887
Mrpl51	0.0773691	0.0208333	24	9	6.11492	45.1055	69.5409	46.8403	41.0751
Shb	0.0773691	0.0208333	24	12	6.08921	16.5694	24.6336	30.9073	21.7486
Lrrfip2	0.0773691	0.0208333	24	12	6.08653	24.2633	33.8136	37.8336	30.1686
Dolpp1	0.0773691	0.0208333	24	12	6.0831	26.1816	32.7837	37.2924	26.6889
Gm14085	0.0773691	0.0208333	24	6	6.08102	12.8009	17.778	7.73565	5.64352
Bloc1s2	0.0773691	0.0208333	24	6	6.07907	38.9099	45.3332	34.3192	32.7297
Tuba1b	0.0773691	0.0208333	24	3	6.0744	30.3832	27.9945	19.3711	21.8256
Klf3	0.0773691	0.0208333	24	18	6.06015	19.8737	11.6934	22.5784	26.1294
Frk	0.0773691	0.0208333	24	21	6.05828	22.3795	16.1899	18.3442	29.29
Bax	0.0773691	0.0208333	24	9	6.04735	40.8815	64.8506	44.6364	38.9349
Mrpl46	0.0773691	0.0208333	24	6	6.04672	26.4197	27.2095	18.7959	17.7306
Apoo-ps	0.0773691	0.0208333	24	18	6.04104	1.80077	0	6.97212	11.9153
3110001D03Rik	0.0773691	0.0208333	24	9	6.03243	27.1644	37.6535	28.5551	21.9819
Ly6d	0.0773691	0.0208333	24	15	6.02243	12.6104	13.0855	26.7595	18.2884
1700119H24Rik	0.0773691	0.0208333	24	3	6.00672	16.1021	14.6459	5.33891	8.41952
Ppa2	0.0773691	0.0208333	24	9	6.0027	19.6943	29.7561	24.193	17.2766
Sdc4	0.0773691	0.0208333	24	3	6.001	42.2321	39.3338	27.0756	36.5743
Gyk	0.0773691	0.0208333	24	12	5.98244	26.3294	31.9697	41.0186	28.8178
Rer1	0.0773691	0.0208333	24	9	5.97894	150.09	174.319	151.368	145.731
Plekhf2	0.0773691	0.0208333	24	12	5.97682	20.155	28.0522	33.0313	24.0235
Ank3	0.0773691	0.0208333	24	12	5.97424	6.19899	11.9624	17.3509	6.2166
Hmgcr	0.0773691	0.0208333	24	15	5.96982	43.4264	44.5091	77.2938	49.0548
Fbl	0.0773691	0.0208333	24	3	5.95494	25.8772	23.3305	15.6628	16.7018
Gml	0.0773691	0.0208333	24	15	5.95253	5.0324	9.44771	18.1674	13.149
Snx7	0.0773691	0.0208333	24	15	5.9502	25.0484	26.4702	41.0345	30.6583
Ddr1	0.0773691	0.0208333	24	18	5.94606	31.8048	25.4105	36.4432	37.5901
Ell	0.0773691	0.0208333	24	15	5.9369	19.1873	21.4977	32.0053	25.4718
Cept1	0.0773691	0.0208333	24	3	5.92895	32.3854	30.2383	22.3794	23.4747
Ppp2ca	0.0773691	0.0208333	24	21	5.92803	107.777	84.5692	103.272	108.861
Lima1	0.0773691	0.0208333	24	12	5.89579	55.8854	61.444	81.7475	59.5009
Atp6v0a1	0.0773691	0.0208333	24	15	5.89494	23.3072	32.8975	39.9537	32.9244
Pcbd1	0.0773691	0.0208333	24	12	5.89197	32.4283	43.9611	44.3035	38.7485
Cnih	0.0773691	0.0208333	24	12	5.88352	44.0771	50.9963	56.264	46.5421
Epha2	0.0773691	0.0208333	24	12	5.88352	21.0765	29.3558	30.7427	22.3809
Gstt1	0.0773691	0.0208333	24	0	5.88019	26.3604	15.1697	11.2177	16.7616
Prkar2a	0.0773691	0.0208333	24	21	5.87259	19.7497	11.387	16.4259	24.6734
Cct5	0.0773691	0.0208333	24	6	5.84134	51.4001	54.3786	45.1427	44.1142
Rnf44	0.0773691	0.0208333	24	18	5.83176	20.3804	16.0706	22.3326	30.6131
Spnb2	0.0773691	0.0208333	24	18	5.83098	32.5323	23.6445	33.8502	38.8191
Samm50	0.0773691	0.0208333	24	6	5.82271	47.7263	69.6229	46.8097	42.2366
Mafb	0.0773691	0.0208333	24	15	5.82062	21.4466	24.2866	34.6525	27.5439
Manbal	0.0773691	0.0208333	24	9	5.80924	19.9287	31.2821	24.2142	18.7372
Zmiz1	0.0773691	0.0208333	24	18	5.80453	20.1208	14.8576	23.9024	27.4937
Ndrg1	0.0773691	0.0208333	24	15	5.80439	10.5325	19.7949	26.1571	20.5876
1810009A15Rik	0.0773691	0.0208333	24	6	5.78314	41.9624	47.5232	37.8584	35.27
Pdcd5	0.0773691	0.0208333	24	6	5.77667	76.7316	122.401	76.4467	71.2853
Cd9	0.0773691	0.0208333	24	15	5.76999	35.2669	44.701	50.141	46.5927
Gcnt3	0.0773691	0.0208333	24	12	5.76522	13.119	24.169	28.9774	23.5419
2400003C14Rik	0.0773691	0.0208333	24	15	5.75062	69.6201	75.7247	85.4628	76.1472
Tmem183a	0.0773691	0.0208333	24	6	5.75055	53.3215	58.3431	49.1051	46.2945
Gas2l1	0.0773691	0.0208333	24	15	5.72947	23.7128	29.355	38.255	31.0182
Ero1l	0.0773691	0.0208333	24	0	5.70823	23.5971	13.6527	12.1952	18.3961
Slc39a7	0.0773691	0.0208333	24	6	5.70465	40.2982	52.3411	34.9421	34.9198
Cttn	0.0773691	0.0208333	24	15	5.67559	110.073	139.753	145.104	141.047
Ywhab	0.0773691	0.0208333	24	18	5.67291	72.1475	65.9425	75.4158	78.7196
Dhrs4	0.0773691	0.0208333	24	9	5.67135	37.2711	47.9851	39.2464	33.8994
Npepps	0.0773691	0.0208333	24	21	5.65555	30.6427	25.2314	25.919	36.504
Tnfaip1	0.0773691	0.0208333	24	12	5.64855	56.086	67.2495	67.8762	62.5507
Yipf1	0.0773691	0.0208333	24	9	5.62383	67.8772	86.1388	69.0194	63.7172
Psmd13	0.0773691	0.0208333	24	9	5.62033	59.8051	89.5164	63.8426	58.5437
Asah1	0.0773691	0.0208333	24	18	5.60845	35.4741	28.3933	36.1163	43.6142
Tpra1	0.0773691	0.0208333	24	12	5.60082	18.787	27.8232	28.4551	21.6498
Comtd1	0.0773691	0.0208333	24	12	5.59947	10.227	18.8425	20.1043	12.8821
Clk3	0.0773691	0.0208333	24	12	5.59116	26.2005	35.2265	37.4722	30.684
Usp12	0.0773691	0.0208333	24	12	5.59074	24.5389	31.4648	36.7028	27.8157
Nkx6-2	0.0773691	0.0208333	24	9	5.58435	4.44949	13.2504	11.3521	4.35807
Clstn1	0.0773691	0.0208333	24	15	5.58126	23.0229	23.3247	33.1767	28.9571
Ppapdc1b	0.0773691	0.0208333	24	3	5.57564	39.805	30.3568	24.1094	30.2821
Myh11	0.0773691	0.0208333	24	3	5.5753	31.2923	6.66932	1.41288	2.29221
Trib3	0.0773691	0.0208333	24	9	5.56747	5.71359	12.8944	12.5515	3.98512
Ndfip1	0.0773691	0.0208333	24	15	5.56741	129.058	133.692	159.608	134.307
Fbln1	0.0773691	0.0208333	24	9	5.55786	8.10832	14.9637	14.2156	5.35099
Slc2a7	0.0773691	0.0208333	24	9	5.55482	3.90136	12.2651	9.10498	1.75731
Cript	0.0773691	0.0208333	24	9	5.54895	59.7967	66.7676	62.6415	53.9176
Mrps24	0.0773691	0.0208333	24	6	5.5481	36.3973	57.8703	33.2279	31.1665
Otc	0.0773691	0.0208333	24	6	5.54478	45.7607	52.4098	42.0676	40.4199
Dram2	0.0773691	0.0208333	24	0	5.53555	39.7157	31.627	29.6181	37.1863
C78339	0.0773691	0.0208333	24	18	5.53113	12.103	7.7277	16.9546	18.5205
Slc30a1	0.0773691	0.0208333	24	18	5.53102	23.6768	19.559	24.7737	35.1141
Rcan1	0.0773691	0.0208333	24	12	5.53018	13.28	19.7449	23.7188	14.542
Tubb5	0.0773691	0.0208333	24	3	5.52374	31.3374	21.1102	15.749	21.0751
Rab11b	0.0773691	0.0208333	24	12	5.52261	19.3335	27.8006	30.7119	23.5587
Plek2	0.0773691	0.0208333	24	15	5.51915	14.8737	19.6692	60.4966	20.0772
Csrp2	0.0773691	0.0208333	24	6	5.49892	30.2573	34.3986	27.2036	21.899
Gstt2	0.0773691	0.0208333	24	6	5.49779	24.946	30.4634	21.0601	18.7992
Ebpl	0.0773691	0.0208333	24	9	5.48747	10.9505	19.6583	16.0576	9.24449
Bcas1	0.0773691	0.0208333	24	12	5.48733	14.133	20.2312	23.9492	14.5269
Timm13	0.0773691	0.0208333	24	9	5.48722	49.1957	85.9667	51.4985	46.3251
Git1	0.0773691	0.0208333	24	15	5.4869	25.3294	35.4177	40.5908	35.8484
Hmgb2	0.0773691	0.0208333	24	3	5.48555	20.8516	14.7306	8.77103	11.2957
Smpdl3b	0.0773691	0.0208333	24	0	5.47484	56.7342	50.0333	43.9113	52.6956
Mapkapk5	0.0773691	0.0208333	24	15	5.46837	40.5566	49.8374	55.4396	50.4213
Mcoln1	0.0773691	0.0208333	24	12	5.4607	13.8461	21.4382	26.5776	18.7245
Derl1	0.0773691	0.0208333	24	6	5.45968	47.1909	47.5485	40.4242	38.8729
Mrps33	0.0773691	0.0208333	24	6	5.44267	38.5938	46.7857	36.1602	33.4624
Stat2	0.0773691	0.0208333	24	15	5.41707	22.8807	29.3674	36.5374	31.0325
Ksr1	0.0773691	0.0208333	24	21	5.41445	13.1108	5.69382	9.71991	17.6173
Ube2s	0.0773691	0.0208333	24	6	5.41287	65.0196	94.3237	64.1848	59.9163
Mtap4	0.0773691	0.0208333	24	15	5.41117	17.9301	22.7041	28.3579	27.5814
Capn9	0.0773691	0.0208333	24	12	5.40388	7.43147	12.5263	19.2615	7.74571
Ppp4r1	0.0773691	0.0208333	24	15	5.39855	29.2169	35.0605	41.2947	38.2521
2010003O02Rik	0.0773691	0.0208333	24	6	5.39505	26.0979	32.5687	25.85	17.5571
Crk	0.0773691	0.0208333	24	21	5.37751	29.4797	20.0191	24.2545	30.0038
Arhgap1	0.0773691	0.0208333	24	18	5.36839	49.9231	44.6451	53.7812	55.9711
Cdcp1	0.0773691	0.0208333	24	21	5.35966	11.1864	4.42425	6.67035	15.0676
Tom1l1	0.0773691	0.0208333	24	15	5.33901	23.0044	23.9289	33.1308	28.9035
Akr1c14	0.0773691	0.0208333	24	15	5.33371	5.11823	9.57608	28.3123	10.1469
Rbp7	0.0773691	0.0208333	24	9	5.33277	13.2575	18.5857	15.5115	5.75634
Akr1b8	0.0773691	0.0208333	24	3	5.31716	38.7587	10.9792	5.96613	10.1572
Sec31a	0.0773691	0.0208333	24	12	5.3143	43.1219	53.0671	54.912	49.8261
Abat	0.0773691	0.0208333	24	12	5.31394	17.7829	23.7935	28.5783	19.5588
Isca2	0.0773691	0.0208333	24	9	5.29885	28.6031	34.5447	34.1914	25.1456
Rab10	0.0773691	0.0208333	24	18	5.29117	31.4782	28.3679	36.4758	38.336
Plekhh3	0.0773691	0.0208333	24	12	5.28463	9.9416	18.248	19.9621	13.3213
Ptpmt1	0.0773691	0.0208333	24	9	5.28258	38.5554	47.0376	43.5485	37.0893
Ugcg	0.0773691	0.0208333	24	9	5.28234	30.6935	35.8132	34.6054	24.7844
Ppp2r5b	0.0773691	0.0208333	24	12	5.27321	11.3205	19.0148	24.6338	17.4132
S100a14	0.0773691	0.0208333	24	12	5.26416	11.2884	16.2515	21.8442	11.8611
Dbndd2	0.0773691	0.0208333	24	12	5.25257	12.7726	21.357	21.6197	15.3476
0610007C21Rik	0.0773691	0.0208333	24	9	5.2281	48.2896	56.5254	49.1239	42.5724
Tfdp1	0.0773691	0.0208333	24	21	5.2258	17.4426	7.9627	14.5076	19.8085
2410004N09Rik	0.0773691	0.0208333	24	6	5.20331	15.5497	16.5237	10.7399	6.61633
Arrdc1	0.0773691	0.0208333	24	12	5.18833	33.3061	51.0537	55.348	50.4564
Ccdc53	0.0773691	0.0208333	24	9	5.18186	28.6926	37.065	30.4259	24.1418
Plekha2	0.0773691	0.0208333	24	0	5.17983	19.2025	11.7543	9.83004	17.0326
Spsb2	0.0773691	0.0208333	24	12	5.15665	19.1198	27.4367	32.4166	26.1483
U2af2	0.0773691	0.0208333	24	15	5.13812	56.2043	61.9534	68.5536	64.1369
Apobec2	0.0773691	0.0208333	24	0	5.13617	10.1531	2.70747	1.73517	8.81682
Htatip2	0.0773691	0.0208333	24	9	5.11334	25.8298	36.1767	26.9857	22.1648
Ict1	0.0773691	0.0208333	24	6	5.10761	32.6958	50.0016	29.0572	27.8803
Srrm2	0.0773691	0.0208333	24	18	5.10153	18.7799	15.4337	21.1465	27.4964
Smad1	0.0773691	0.0208333	24	21	5.07321	13.627	8.84393	10.8863	22.6603
Chd3	0.0773691	0.0208333	24	21	5.07229	17.2047	6.63978	16.3585	21.1407
Hspa1b	0.0773691	0.0208333	24	15	5.06944	2.69848	3.84626	11.3029	9.58038
Aim1l	0.0773691	0.0208333	24	12	5.06741	12.1617	19.8556	26.1098	19.4709
Hmgn1	0.0773691	0.0208333	24	3	5.06094	22.0343	16.6968	11.6189	12.7977
Ppih	0.0773691	0.0208333	24	3	5.05765	24.9165	18.628	13.8596	14.8055
Hsd17b7	0.0773691	0.0208333	24	15	5.05586	8.11679	8.38262	18.0798	12.8835
Srp19	0.0773691	0.0208333	24	6	5.05518	28.2612	29.4561	22.0848	21.3343
Cdc42	0.0773691	0.0208333	24	6	5.04874	260.378	287.906	256.194	255.618
Etv3	0.0773691	0.0208333	24	18	5.02997	15.5709	10.9134	15.6557	26.9867
2810008M24Rik	0.0773691	0.0208333	24	15	5.01812	26.9331	28.6988	36.528	33.2973
Hmga1-rs1	0.0773691	0.0208333	24	3	5.01607	26.946	19.4013	13.5801	18.5796
Bpgm	0.0773691	0.0208333	24	12	5.00953	65.0626	70.4395	78.2832	69.491
Fez2	0.0773691	0.0208333	24	9	4.99716	34.9733	43.7888	39.9953	34.6767
Tmem63b	0.0773691	0.0208333	24	15	4.99285	15.6748	21.3745	26.4801	24.6911
Rbbp7	0.0773691	0.0208333	24	3	4.99285	25.4585	16.4385	11.7312	15.6056
Foxo6	0.0773691	0.0208333	24	15	4.9922	7.12347	9.87395	15.9613	15.1562
Snta1	0.0773691	0.0208333	24	12	4.9882	6.7113	12.4209	18.2488	9.84963
Flii	0.0773691	0.0208333	24	15	4.97747	24.1552	39.3256	44.0184	43.6624
Diap1	0.0773691	0.0208333	24	18	4.97471	16.3914	9.4914	16.9272	23.0262
Ran	0.0773691	0.0208333	24	0	4.97195	50.5516	40.8932	36.4145	41.1021
Phpt1	0.0773691	0.0208333	24	9	4.97174	20.3959	41.3771	22.7816	18.0942
Rnf115	0.0773691	0.0208333	24	18	4.96124	34.6815	28.0482	35.0837	41.6785
Csnk2a1	0.0773691	0.0208333	24	12	4.95958	39.0278	46.0276	50.0248	42.9968
Kcnj13	0.0773691	0.0208333	24	9	4.95532	4.63623	16.1623	5.19933	0.527407
Sh3yl1	0.0773691	0.0208333	24	15	4.95374	16.5019	19.4893	25.0664	24.9361
Zmiz2	0.0773691	0.0208333	24	15	4.94703	15.1806	22.6309	27.295	24.6031
Atp6ap1	0.0773691	0.0208333	24	12	4.93942	44.6256	49.7626	56.2434	47.4096
Tmc8	0.0773691	0.0208333	24	15	4.92599	8.62001	11.6102	19.6574	14.5056
Gdpd2	0.0773691	0.0208333	24	12	4.92122	16.3361	25.1224	27.6079	22.4749
Hsd17b10	0.0773691	0.0208333	24	6	4.89983	35.7576	52.2076	34.2119	31.138
Src	0.0773691	0.0208333	24	12	4.89569	39.0862	43.7019	52.2074	41.4771
Fat1	0.0773691	0.0208333	24	18	4.88466	22.9931	14.7657	23.6103	27.9644
2610002J02Rik	0.0773691	0.0208333	24	12	4.88427	15.7908	22.8636	23.0649	16.3229
Btg1	0.0773691	0.0208333	24	21	4.85602	31.6482	24.3247	28.5195	34.9309
Trappc6b	0.0773691	0.0208333	24	12	4.85333	27.5282	33.4324	40.7536	32.9305
C530008M17Rik	0.0773691	0.0208333	24	15	4.84089	17.381	22.0336	29.8218	23.2849
Coro1c	0.0773691	0.0208333	24	15	4.83237	108.216	113.634	118.85	116.668
Cyth1	0.0773691	0.0208333	24	12	4.82176	11.4559	17.853	22.0678	14.8269
9530008L14Rik	0.0773691	0.0208333	24	9	4.81448	40.4685	48.964	45.4769	40.355
Tmem223	0.0773691	0.0208333	24	6	4.8102	35.1448	49.8644	32.7945	30.6097
Zbtb8os	0.0773691	0.0208333	24	9	4.80818	57.8265	78.7051	59.5623	55.0291
Wasf2	0.0773691	0.0208333	24	18	4.80789	12.7113	6.71143	15.5447	17.4768
Atg9a	0.0773691	0.0208333	24	15	4.80341	41.9109	54.4916	59.0203	56.7657
Cops5	0.0773691	0.0208333	24	3	4.78655	47.8479	46.4548	37.9856	42.7787
Ptprd	0.0773691	0.0208333	24	15	4.78462	4.85282	5.74782	14.2082	9.92538
D730039F16Rik	0.0773691	0.0208333	24	12	4.78207	4.26086	11.8903	16.5411	10.6448
Nsa2	0.0773691	0.0208333	24	6	4.77711	28.8139	34.1075	26.1318	23.2779
Fam120a	0.0773691	0.0208333	24	18	4.77318	38.9741	32.7425	40.7961	44.4211
Snrpd1	0.0773691	0.0208333	24	3	4.76459	25.7229	23.0869	16.5981	18.7354
Mapre2	0.0773691	0.0208333	24	15	4.75578	8.03365	8.47818	16.5053	13.4579
Gbp1	0.0773691	0.0208333	24	15	4.74922	8.70547	10.6265	19.3944	13.3704
Sarnp	0.0773691	0.0208333	24	3	4.73005	22.6833	22.318	15.7033	15.9194
Itpa	0.0773691	0.0208333	24	3	4.6854	32.2897	31.4633	24.3093	26.1914
Ifi27l2a	0.0773691	0.0208333	24	6	4.67829	22.356	25.9514	17.9112	17.164
Eif4ebp2	0.0773691	0.0208333	24	18	4.67295	14.2686	11.1945	19.1875	19.4927
Alkbh6	0.0773691	0.0208333	24	9	4.66637	22.0329	33.2727	25.7798	21.3803
Mesdc1	0.0773691	0.0208333	24	15	4.66531	19.3272	21.1449	28.3646	25.303
Bcr	0.0773691	0.0208333	24	12	4.6634	10.2349	17.7079	19.6587	13.9416
Fkbp3	0.0773691	0.0208333	24	6	4.65963	16.3966	16.7423	10.3302	9.62928
Lsm4	0.0773691	0.0208333	24	9	4.65651	45.054	71.4983	49.2917	44.9015
Adk	0.0773691	0.0208333	24	12	4.65195	33.9611	47.8442	50.2438	45.8579
Spats2l	0.0773691	0.0208333	24	18	4.62801	13.7248	11.0762	18.2861	19.6049
9130011J15Rik	0.0773691	0.0208333	24	9	4.61479	32.6447	40.8155	34.1883	29.3065
Ell2	0.0773691	0.0208333	24	15	4.60678	9.52875	11.0897	18.8603	14.7881
Csk	0.0773691	0.0208333	24	15	4.60677	35.7245	50.0898	54.4331	50.2199
Rab9	0.0773691	0.0208333	24	0	4.60528	31.6935	24.2635	22.0202	27.6159
Hemt1	0.0773691	0.0208333	24	15	4.59719	3.89721	6.29767	12.7906	10.4071
Gstp2	0.0773691	0.0208333	24	3	4.57537	54.8082	51.5072	40.2282	50.4945
Odf3b	0.0773691	0.0208333	24	15	4.56769	9.07942	13.9884	21.3826	14.6046
Il22ra1	0.0773691	0.0208333	24	21	4.56377	35.7214	29.7818	33.0689	40.0376
Papola	0.0773691	0.0208333	24	21	4.55037	21.3069	13.3125	17.4629	22.3389
Rbx1	0.0773691	0.0208333	24	6	4.5461	27.8724	33.4887	25.583	22.9198
Ppcs	0.0773691	0.0208333	24	3	4.5444	23.3547	21.3128	15.5962	16.2178
Gm11437	0.0773691	0.0208333	24	0	4.52943	14.6428	8.64721	7.32814	14.1437
Dync1li1	0.0773691	0.0208333	24	15	4.52633	13.271	13.9058	20.044	19.9352
Hnrnpul1	0.0773691	0.0208333	24	18	4.52428	18.5772	13.3874	19.8695	24.8917
Tom1l2	0.0773691	0.0208333	24	15	4.51078	25.6427	30.2099	37.6076	31.0034
Chrac1	0.0773691	0.0208333	24	6	4.49214	24.8284	28.1707	21.6847	18.6087
Acad11	0.0773691	0.0208333	24	3	4.49062	33.1661	27.542	22.021	25.9857
Dexi	0.0773691	0.0208333	24	12	4.49038	10.33	15.6155	17.8103	10.3951
Lrrc8d	0.0773691	0.0208333	24	0	4.4903	18.8156	12.462	10.9447	17.2916
Polr2k	0.0773691	0.0208333	24	3	4.48903	33.3579	33.0915	26.3028	27.4497
Slc25a37	0.0773691	0.0208333	24	15	4.48514	31.4636	35.9157	42.1101	37.9551
Taf9	0.0773691	0.0208333	24	3	4.48065	33.7653	26.3638	22.1394	24.2465
2410022L05Rik	0.0773691	0.0208333	24	12	4.48048	14.344	20.7646	23.3565	17.1044
Mrpl22	0.0773691	0.0208333	24	6	4.47524	26.5055	30.5215	22.3192	22.0499
Gmnn	0.0773691	0.0208333	24	6	4.47266	20.5562	22.2419	17.0858	13.0617
Riok3	0.0773691	0.0208333	24	9	4.46831	30.0669	36.6863	36.0852	30.0663
Pdia6	0.0773691	0.0208333	24	3	4.46623	99.9196	82.7008	78.49	79.9251
Rhot2	0.0773691	0.0208333	24	18	4.46623	18.8208	18.1936	23.2458	26.401
Fbp1	0.0773691	0.0208333	24	0	4.45642	19.2135	12.95	9.57625	15.9174
Prmt1	0.0773691	0.0208333	24	3	4.43778	16.7082	14.3099	8.6492	9.81696
Snora43	0.0773691	0.0208333	24	12	4.43541	9.34226	13.524	46.6701	10.415
Hgfac	0.0773691	0.0208333	24	12	4.43519	12.2537	18.6874	20.82	14.7091
2900064A13Rik	0.0773691	0.0208333	24	9	4.42995	41.7195	52.1665	43.4455	39.2689
Stoml2	0.0773691	0.0208333	24	3	4.42988	26.1476	22.9793	16.6549	19.9424
Lpin3	0.0773691	0.0208333	24	12	4.42306	28.5497	32.7198	44.5642	30.6568
Apool	0.0773691	0.0208333	24	9	4.4011	27.7638	36.4526	28.2231	24.0737
Smad4	0.0773691	0.0208333	24	15	4.39937	19.7752	21.414	28.3576	25.2749
Abcd4	0.0773691	0.0208333	24	9	4.39754	10.6898	17.9359	14.7466	9.55459
5730403B10Rik	0.0773691	0.0208333	24	9	4.39357	11.6382	18.8819	16.5094	11.3262
Cry1	0.0773691	0.0208333	24	21	4.38726	8.67515	4.5388	7.75942	18.7636
Leng8	0.0773691	0.0208333	24	18	4.38689	19.8356	17.7664	24.9384	25.0716
Nenf	0.0773691	0.0208333	24	9	4.38275	15.2093	31.7256	17.3496	13.2175
Plk3	0.0773691	0.0208333	24	12	4.36788	6.85392	10.972	19.9625	8.115
Gtf2h5	0.0773691	0.0208333	24	9	4.35801	22.4168	28.2322	24.5667	18.0558
Ugp2	0.0773691	0.0208333	24	12	4.35447	28.2095	36.1299	36.8503	32.4544
Nhsl1	0.0773691	0.0208333	24	21	4.33923	17.9	10.8972	13.159	18.4294
Pigyl	0.0773691	0.0208333	24	9	4.33391	12.4988	18.5781	13.5191	7.34026
Slc2a2	0.0773691	0.0208333	24	12	4.33103	3.13259	7.21592	18.5619	3.39032
Rab5b	0.0773691	0.0208333	24	18	4.32495	25.6786	21.8399	27.7969	31.9544
Stat6	0.0773691	0.0208333	24	21	4.31728	36.4475	32.0659	32.8031	40.6326
Etfdh	0.0773691	0.0208333	24	0	4.31279	37.9309	33.715	28.1758	36.1583
Paqr7	0.0773691	0.0208333	24	0	4.31025	48.4237	4.70971	4.67992	8.74366
Mgrn1	0.0773691	0.0208333	24	15	4.30331	28.9003	36.5847	40.6419	38.7517
Prr24	0.0773691	0.0208333	24	12	4.29921	12.3242	19.5398	20.1558	15.2114
Pink1	0.0773691	0.0208333	24	9	4.29642	33.7599	53.3999	36.6931	32.6424
Ap1m1	0.0773691	0.0208333	24	12	4.29398	13.6227	19.3644	21.9676	15.5641
Mrm1	0.0773691	0.0208333	24	15	4.28464	10.1874	13.7826	21.0167	15.0721
Snd1	0.0773691	0.0208333	24	3	4.28323	29.9283	27.9437	21.7176	24.0396
Glipr2	0.0773691	0.0208333	24	3	4.28135	14.6406	14.5034	3.57498	10.6041
0610009B22Rik	0.0773691	0.0208333	24	0	4.27227	22.1396	16.6232	15.1444	21.7118
Rock2	0.0773691	0.0208333	24	18	4.26391	13.147	9.23024	15.1655	19.2719
Ssna1	0.0773691	0.0208333	24	3	4.25463	23.5151	22.2574	14.5813	19.1573
Trnau1ap	0.0773691	0.0208333	24	6	4.23057	11.8817	15.9292	8.40637	7.43868
Wipf3	0.0773691	0.0208333	24	15	4.22963	9.19259	11.9543	19.1662	13.9439
Sipa1l3	0.0773691	0.0208333	24	18	4.22482	14.4193	11.8593	16.1742	22.054
Jarid2	0.0773691	0.0208333	24	15	4.22383	10.336	13.2587	19.4432	16.0983
Ap1ar	0.0773691	0.0208333	24	21	4.22107	23.3895	18.2015	20.6487	27.3997
Impdh2	0.0773691	0.0208333	24	3	4.20948	16.5742	13.6788	8.2798	10.067
Tmed3	0.0773691	0.0208333	24	9	4.20318	38.9355	53.983	39.928	35.9652
Slc22a4	0.0773691	0.0208333	24	6	4.2006	20.6859	22.1351	17.0915	13.8484
Pgm2	0.0773691	0.0208333	24	3	4.20004	29.0349	25.5571	20.9067	21.8058
Rnf7	0.0773691	0.0208333	24	6	4.19657	25.289	29.5069	22.6117	20.3145
2010005H15Rik	0.0773691	0.0208333	24	15	4.19625	5.71971	7.79289	12.816	12.5654
Erlin1	0.0773691	0.0208333	24	6	4.18653	32.4012	34.9475	31.0004	23.7055
Slc39a14	0.0773691	0.0208333	24	21	4.18526	22.8649	16.6756	17.4023	23.0507
Fam83g	0.0773691	0.0208333	24	12	4.1813	10.4669	16.1941	17.847	11.7477
Ier3ip1	0.0773691	0.0208333	24	9	4.17868	40.0989	47.9669	40.5865	36.6354
Psmc6	0.0773691	0.0208333	24	0	4.17737	51.7186	44.6676	41.6188	46.3832
Polr2h	0.0773691	0.0208333	24	9	4.1632	19.9303	29.2558	20.122	16.1969
Uxt	0.0773691	0.0208333	24	9	4.16033	18.3799	32.3532	22.2003	18.2779
Zswim7	0.0773691	0.0208333	24	6	4.15616	17.8399	20.5168	16.2151	10.3862
Tmem139	0.0773691	0.0208333	24	3	4.14764	40.0583	36.6903	32.0844	32.9329
Slc44a1	0.0773691	0.0208333	24	21	4.14496	13.6284	7.81288	11.6903	17.5985
Golga7	0.0773691	0.0208333	24	21	4.13905	25.8893	21.0652	21.9059	28.7888
Pdcd10	0.0773691	0.0208333	24	21	4.13339	37.8173	32.687	34.3675	40.9282
Macrod1	0.0773691	0.0208333	24	12	4.11639	5.76677	13.0347	13.962	9.58703
Pex11c	0.0773691	0.0208333	24	9	4.1097	21.3391	28.5932	22.3922	18.0223
Usp16	0.0773691	0.0208333	24	0	4.10942	24.5256	20.535	15.1781	22.8107
Gpd1l	0.0773691	0.0208333	24	3	4.10351	19.2848	14.519	9.72092	12.4764
Ensa	0.0773691	0.0208333	24	12	4.10023	44.5342	48.7091	54.0553	46.633
Mcart1	0.0773691	0.0208333	24	12	4.09054	22.8269	26.6835	33.7092	23.7676
Hbp1	0.0773691	0.0208333	24	3	4.08163	20.7799	20.5316	11.8203	16.9317
Lgals8	0.0773691	0.0208333	24	12	4.08036	31.016	34.863	42.3589	32.8218
Rarres2	0.0773691	0.0208333	24	3	4.07619	28.8935	28.0925	22.6205	22.8363
Nono	0.0773691	0.0208333	24	0	4.07371	41.6508	34.2238	32.0833	36.1785
Cd274	0.0773691	0.0208333	24	18	4.06687	9.24433	5.67662	12.7646	13.6592
Evpl	0.0773691	0.0208333	24	15	4.06543	7.01722	11.3206	17.9854	11.8512
Lage3	0.0773691	0.0208333	24	6	4.06251	15.8238	19.5131	13.1748	10.6716
Zfyve19	0.0773691	0.0208333	24	12	4.04957	11.2078	17.609	17.7255	12.6728
Pnn	0.0773691	0.0208333	24	18	4.04932	18.6183	15.2505	21.5559	23.7661
Echs1	0.0773691	0.0208333	24	9	4.0444	62.569	72.7287	66.1082	62.2951
Rnase1	0.0773691	0.0208333	24	6	4.03765	6.86771	9.32685	2.56428	2.21007
Tnks1bp1	0.0773691	0.0208333	24	12	4.03645	13.8011	17.6067	33.839	15.5707
Mfsd4	0.0773691	0.0208333	24	0	4.03214	10.4064	5.34526	2.76471	9.10819
Epas1	0.0773691	0.0208333	24	18	4.02846	8.67484	6.90225	13.4835	13.4878
Timm10	0.0773691	0.0208333	24	3	4.02605	18.2392	17.2047	11.4629	12.5936
Mcts1	0.0773691	0.0208333	24	6	4.01863	23.7394	26.3001	21.4797	17.1934
Zfp706	0.0773691	0.0208333	24	12	4.01676	34.4094	38.5153	45.4583	38.2031
Hck	0.0773691	0.0208333	24	12	4.01472	3.0383	10.9957	12.6365	8.85139
Pigs	0.0773691	0.0208333	24	12	4.00739	18.0499	28.9411	30.7666	26.9884
Ube2d3	0.0773691	0.0208333	24	21	4.00537	68.3682	58.5977	66.9482	70.7245
Apaf1	0.0773691	0.0208333	24	0	3.99321	17.969	11.3249	10.5103	15.1607
Yif1b	0.0773691	0.0208333	24	15	3.99204	11.5286	15.8428	20.4272	18.2354
Arhgef2	0.0773691	0.0208333	24	9	3.98405	15.3199	23.1348	18.5906	14.8344
Inadl	0.0773691	0.0208333	24	12	3.96383	22.0186	27.9479	32.3347	27.0526
Fblim1	0.0773691	0.0208333	24	21	3.95913	34.8373	31.1046	33.1797	41.9036
Paf1	0.0773691	0.0208333	24	12	3.95814	20.8568	26.9673	28.4055	23.3207
Mrpl32	0.0773691	0.0208333	24	6	3.9377	29.367	35.961	25.7335	25.6545
Hiatl1	0.0773691	0.0208333	24	21	3.93269	16.261	8.96186	13.4418	17.266
Clasrp	0.0773691	0.0208333	24	12	3.91818	13.0428	19.3228	19.3736	14.5713
Gas5	0.0773691	0.0208333	24	3	3.90924	9.94527	9.13138	3.93894	4.08072
Hmgb1	0.0773691	0.0208333	24	3	3.90779	52.8746	39.4612	35.7769	37.2924
Cyp2c68	0.0773691	0.0208333	24	6	3.90601	12.0026	16.5239	11.2317	6.24694
Optn	0.0773691	0.0208333	24	18	3.90146	103.457	100.057	104.4	110.149
Hook1	0.0773691	0.0208333	24	21	3.88689	11.8198	5.00512	10.0587	14.2378
Mrps35	0.0773691	0.0208333	24	6	3.88088	20.1016	21.0061	16.475	13.6559
Zdhhc4	0.0773691	0.0208333	24	9	3.88	13.7081	19.9128	17.8309	13.0613
Sla2	0.0773691	0.0208333	24	6	3.87519	18.1513	21.7211	16.6866	12.2251
2010001E11Rik	0.0773691	0.0208333	24	9	3.86959	7.59238	13.8515	10.9759	6.29016
Deaf1	0.0773691	0.0208333	24	12	3.86444	10.5157	15.0157	18.7993	12.369
Khnyn	0.0773691	0.0208333	24	21	3.86432	10.9274	6.03326	8.77318	14.809
Ube2b	0.0773691	0.0208333	24	6	3.84885	33.2407	35.2335	28.884	28.704
Upk3a	0.0773691	0.0208333	24	18	3.84664	8.05245	4.26258	8.25548	14.9395
BC017612	0.0773691	0.0208333	24	9	3.84613	22.1061	27.5506	24.7742	19.3402
U2af1l4	0.0773691	0.0208333	24	9	3.83061	24.3373	31.4223	26.39	22.6404
Pdap1	0.0773691	0.0208333	24	9	3.82973	29.5327	38.6375	31.9475	28.3368
Fam110c	0.0773691	0.0208333	24	18	3.8235	12.4604	11.496	16.5754	18.1955
Nat2	0.0773691	0.0208333	24	12	3.82227	17.8663	22.6714	24.1886	18.1827
Abhd5	0.0773691	0.0208333	24	12	3.81506	9.46163	13.0585	21.4993	12.3709
Galnt7	0.0773691	0.0208333	24	21	3.81349	11.2564	5.88587	6.71066	12.1263
Slc23a1	0.0773691	0.0208333	24	9	3.80653	3.41316	8.82113	5.6595	0.300967
Fkbp5	0.0773691	0.0208333	24	15	3.80003	1.93325	3.01206	25.1265	5.51595
Mrps11	0.0773691	0.0208333	24	6	3.79691	14.0872	17.2124	12.3477	8.21261
Ppp1r14a	0.0773691	0.0208333	24	6	3.78341	9.33353	11.5812	6.86908	3.34455
Tnfrsf1a	0.0773691	0.0208333	24	12	3.78337	105.037	124.108	126.262	122.695
Slc22a23	0.0773691	0.0208333	24	18	3.77811	14.4384	13.3172	19.1262	19.3155
2010106G01Rik	0.0773691	0.0208333	24	0	3.76863	21.2537	16.3532	15.3944	21.1532
Picalm	0.0773691	0.0208333	24	21	3.76662	81.4526	54.1728	78.8949	82.4461
Acbd6	0.0773691	0.0208333	24	9	3.75974	7.37994	15.7663	9.36621	5.82149
Tmem131	0.0773691	0.0208333	24	15	3.75972	14.4438	15.1606	20.6782	19.5603
Nlrc4	0.0773691	0.0208333	24	21	3.75859	18.6311	14.6917	17.5627	24.2542
Lass6	0.0773691	0.0208333	24	21	3.75661	8.31614	4.30699	5.89084	12.507
4932438A13Rik	0.0773691	0.0208333	24	0	3.75172	9.6551	3.80734	2.62603	7.38975
Hps5	0.0773691	0.0208333	24	18	3.74671	14.4877	12.2896	16.8299	20.5447
Hadha	0.0773691	0.0208333	24	3	3.73034	80.856	80.7416	58.535	77.339
Cdk2ap1	0.0773691	0.0208333	24	9	3.72401	36.6212	42.2157	40.6255	35.6869
Sh3gl1	0.0773691	0.0208333	24	12	3.71899	28.6209	32.1272	40.0246	32.1162
Slc22a1	0.0773691	0.0208333	24	9	3.7186	14.8234	21.4586	17.9462	14.0636
Ddb1	0.0773691	0.0208333	24	3	3.71857	40.3338	37.2907	31.0799	36.0269
Ank	0.0773691	0.0208333	24	18	3.70757	12.7812	11.4866	17.3371	17.4173
Aimp2	0.0773691	0.0208333	24	6	3.70457	17.6948	24.916	15.2287	14.2021
Cxcl10	0.0773691	0.0208333	24	12	3.70441	4.53725	11.2973	12.0131	8.29551
Alyref	0.0773691	0.0208333	24	6	3.70269	21.3175	22.574	17.1411	16.2776
Tprkb	0.0773691	0.0208333	24	6	3.70015	17.0552	21.2797	15.766	12.1033
Unc93a	0.0773691	0.0208333	24	6	3.69735	8.02931	12.8114	6.42665	3.95637
2010001M09Rik	0.0773691	0.0208333	24	18	3.69294	14.9927	10.0687	15.3462	20.1604
Ap3s1	0.0773691	0.0208333	24	15	3.68304	32.6202	35.2932	40.6862	37.6444
Arl2bp	0.0773691	0.0208333	24	9	3.67307	17.9555	23.6741	22.2901	17.6197
Ykt6	0.0773691	0.0208333	24	6	3.67232	58.1252	68.5341	57.4615	54.6629
Gm6644	0.0773691	0.0208333	24	6	3.67031	18.872	23.2234	16.6175	15.0967
Snord15b	0.0773691	0.0208333	24	12	3.66896	7.72797	11.1871	19.3029	8.61533
Sbds	0.0773691	0.0208333	24	15	3.66564	64.306	74.5215	77.9775	77.3722
Ano10	0.0773691	0.0208333	24	12	3.66235	24.7795	31.3259	33.4013	29.589
Gm10052	0.0773691	0.0208333	24	3	3.66083	26.8236	23.5029	17.7236	22.2485
Lrp5	0.0773691	0.0208333	24	15	3.65351	10.0232	10.839	16.8673	14.3286
Sumo3	0.0773691	0.0208333	24	3	3.65153	35.0517	34.3181	29.1348	29.9069
Napa	0.0773691	0.0208333	24	12	3.64369	34.1475	50.4262	52.3319	48.8966
Sh3gl2	0.0773691	0.0208333	24	15	3.64331	9.72947	11.7672	17.7333	14.0682
Pa2g4	0.0773691	0.0208333	24	3	3.63983	26.8577	23.2364	18.4393	21.3598
Zdhhc5	0.0773691	0.0208333	24	18	3.63895	29.8955	24.9172	30.6075	34.4977
Acat2	0.0773691	0.0208333	24	15	3.63212	15.0903	19.1248	25.3449	19.1434
Dqx1	0.0773691	0.0208333	24	12	3.63181	27.1352	32.92	35.1467	30.6592
Mrpl45	0.0773691	0.0208333	24	3	3.62859	18.9983	14.3138	10.3464	12.7025
Abcb10	0.0773691	0.0208333	24	12	3.62841	15.6999	19.1208	25.9293	18.4872
Wbp5	0.0773691	0.0208333	24	3	3.61599	19.7171	10.8964	7.48721	9.65387
Tada3	0.0773691	0.0208333	24	12	3.60391	12.0138	19.4821	20.7432	17.3454
Mrpl21	0.0773691	0.0208333	24	0	3.58722	22.9162	16.836	13.5795	17.6455
Atp6v1h	0.0773691	0.0208333	24	12	3.58284	16.4319	21.4437	21.7042	16.5822
Upf1	0.0773691	0.0208333	24	15	3.58213	10.6205	15.265	18.7668	17.2505
LOC433944	0.0773691	0.0208333	24	12	3.58034	3.91631	7.51355	10.8429	4.31341
Hdac1	0.0773691	0.0208333	24	15	3.58015	35.7442	39.3288	43.3019	41.8973
Rps6kb2	0.0773691	0.0208333	24	12	3.57177	13.1702	20.8319	21.7558	18.3883
Tbk1	0.0773691	0.0208333	24	12	3.57089	24.4992	29.1204	33.3459	27.8671
Fxyd1	0.0773691	0.0208333	24	6	3.56924	10.8004	11.2011	6.51489	5.39128
Hdac3	0.0773691	0.0208333	24	6	3.56626	31.4022	39.9772	29.498	28.0399
Coro7	0.0773691	0.0208333	24	12	3.54918	16.5672	23.5061	26.5524	23.2062
Mad2l2	0.0773691	0.0208333	24	15	3.53787	11.7931	14.5341	20.6993	15.6345
Sh3d19	0.0773691	0.0208333	24	21	3.53465	20.7396	13.7511	18.5073	21.8398
1110031I02Rik	0.0773691	0.0208333	24	9	3.52878	11.1597	16.3814	15.6306	10.8714
Fcer1g	0.0773691	0.0208333	24	0	3.52648	22.3948	19.07	14.807	22.0291
Depdc7	0.0773691	0.0208333	24	12	3.52316	14.7383	19.6823	21.571	16.55
Sdsl	0.0773691	0.0208333	24	9	3.52108	10.2981	15.5322	12.6593	7.93427
Rasa4	0.0773691	0.0208333	24	12	3.51657	8.68915	12.0046	17.5255	10.006
Tfeb	0.0773691	0.0208333	24	12	3.50941	5.70062	9.00932	16.8518	8.92076
Polr2a	0.0773691	0.0208333	24	18	3.5049	9.47917	7.70737	12.2126	14.8873
Syap1	0.0773691	0.0208333	24	18	3.50188	24.1076	22.1037	27.6123	28.5038
Dact2	0.0773691	0.0208333	24	12	3.5011	9.4483	13.9781	16.6237	11.2509
Dnaja1	0.0773691	0.0208333	24	15	3.50018	37.9928	39.6732	55.7571	41.2928
Dnajb12	0.0773691	0.0208333	24	18	3.49827	23.4114	21.0132	24.7601	29.5591
Btnl4	0.0773691	0.0208333	24	0	3.49148	36.6103	33.3185	24.7935	33.8761
Gm15645	0.0773691	0.0208333	24	12	3.48634	4.95926	8.87173	11.0276	5.07922
Eif1a	0.0773691	0.0208333	24	0	3.48628	35.1652	31.8783	21.2644	34.3112
Brd9	0.0773691	0.0208333	24	12	3.48508	15.0059	20.7984	21.2866	17.2218
Tmem222	0.0773691	0.0208333	24	6	3.46677	34.069	43.2459	32.0173	30.8005
Gm5801	0.0773691	0.0208333	24	9	3.46666	39.7383	45.4382	42.7954	38.6901
Dnajc5	0.0773691	0.0208333	24	18	3.46012	14.7589	14.0555	17.5954	21.0057
Cdca3	0.0773691	0.0208333	24	3	3.45896	19.0213	8.79184	5.5307	7.80512
Fam134a	0.0773691	0.0208333	24	15	3.4434	29.9587	35.1476	38.6787	36.167
9130221H12Rik	0.0773691	0.0208333	24	15	3.44135	28.7338	31.6946	36.1888	33.9732
Reep3	0.0773691	0.0208333	24	3	3.42643	32.4702	27.3173	23.1786	26.9175
Hax1	0.0773691	0.0208333	24	6	3.42462	33.0673	38.0715	32.9936	28.4589
Exph5	0.0773691	0.0208333	24	21	3.41819	7.44893	3.63048	3.92951	9.77915
Amfr	0.0773691	0.0208333	24	12	3.39185	30.449	35.5151	35.8696	31.3421
Eif1ax	0.0773691	0.0208333	24	6	3.38945	25.6202	27.5171	23.3644	20.1861
Liph	0.0773691	0.0208333	24	0	3.3817	28.4232	25.2349	19.2391	25.8797
2410017I17Rik	0.0773691	0.0208333	24	18	3.37618	5.30331	2.99889	8.3826	9.46887
Pparg	0.0773691	0.0208333	24	12	3.3752	2.07599	5.25816	9.54474	2.50648
Cables1	0.0773691	0.0208333	24	12	3.37519	5.93136	10.6646	14.7247	9.91146
Zfp36l1	0.0773691	0.0208333	24	21	3.37183	15.157	9.83002	13.9238	18.1338
Ggt6	0.0773691	0.0208333	24	12	3.37131	24.3884	29.2513	32.7565	28.0839
Eif2s3x	0.0773691	0.0208333	24	0	3.36777	21.0216	14.6718	12.9173	16.093
Slc41a3	0.0773691	0.0208333	24	12	3.36492	6.61607	10.6068	12.8727	7.34601
Copb2	0.0773691	0.0208333	24	3	3.36106	77.7332	77.5835	71.4067	74.4035
Arrdc4	0.0773691	0.0208333	24	21	3.35964	15.339	12.1715	12.3591	29.2706
Urod	0.0773691	0.0208333	24	6	3.35816	15.6301	20.0248	15.1674	10.9892
Pigx	0.0773691	0.0208333	24	6	3.3555	27.1523	30.2085	24.539	23.331
Zdhhc13	0.0773691	0.0208333	24	21	3.35468	11.8377	8.67488	8.95632	18.9193
Acss2	0.0773691	0.0208333	24	15	3.35449	8.76526	8.96551	15.9064	11.9279
Cobra1	0.0773691	0.0208333	24	15	3.34766	24.0585	29.8061	32.9623	32.3488
1700019G17Rik	0.0773691	0.0208333	24	6	3.3362	38.9259	54.0047	38.1171	35.7805
Hmox2	0.0773691	0.0208333	24	12	3.33415	15.0243	19.5519	20.66	15.7572
Ppp2r2d	0.0773691	0.0208333	24	12	3.33224	15.3368	20.2528	20.7259	16.2169
Adck4	0.0773691	0.0208333	24	15	3.33206	11.6616	15.9744	20.9615	16.099
Ptp4a2	0.0773691	0.0208333	24	9	3.33023	63.6633	69.7684	64.2549	60.9407
1110005A03Rik	0.0773691	0.0208333	24	6	3.32284	14.5445	15.1332	10.2176	10.0617
St13	0.0773691	0.0208333	24	18	3.32163	20.6185	16.0846	21.7925	24.3056
Clu	0.0773691	0.0208333	24	9	3.32145	4.48836	20.909	5.68979	2.5583
A930005H10Rik	0.0773691	0.0208333	24	9	3.32094	6.99654	13.5257	9.95997	6.82896
Pllp	0.0773691	0.0208333	24	12	3.31869	6.93838	11.4391	12.1555	7.26955
Rassf1	0.0773691	0.0208333	24	9	3.317	44.3922	49.1652	45.928	41.3191
Rwdd2b	0.0773691	0.0208333	24	9	3.31679	36.998	46.797	38.5945	35.4674
Derl3	0.0773691	0.0208333	24	18	3.31551	4.73745	4.36419	7.64973	10.8296
Mrps5	0.0773691	0.0208333	24	3	3.30983	18.8015	16.8914	11.1632	15.1681
Lypd1	0.0773691	0.0208333	24	6	3.30969	7.7942	10.2612	4.62831	4.06588
Pdha1	0.0773691	0.0208333	24	6	3.30693	50.3295	52.3081	48.8266	44.4576
Aldh1a7	0.0773691	0.0208333	24	9	3.3064	20.0316	26.0434	21.121	17.7809
Gnrh1	0.0773691	0.0208333	24	9	3.30528	3.94287	9.92653	6.42291	3.05782
Pigu	0.0773691	0.0208333	24	3	3.30346	16.9268	16.5938	10.546	13.631
Prdx4	0.0773691	0.0208333	24	3	3.30181	12.2392	10.0808	6.2372	6.74388
Rfc2	0.0773691	0.0208333	24	6	3.29897	24.809	29.5902	23.521	21.5473
Ddit4	0.0773691	0.0208333	24	15	3.29378	9.72367	10.5306	15.7961	13.7744
Prune	0.0773691	0.0208333	24	0	3.2927	14.8114	11.494	8.81184	14.8076
Phf23	0.0773691	0.0208333	24	12	3.29165	18.1794	25.3645	25.8036	22.7002
Trim14	0.0773691	0.0208333	24	21	3.28745	6.48323	3.38379	6.16905	12.8328
Lsm14b	0.0773691	0.0208333	24	12	3.27551	5.59585	10.2855	10.7874	6.21251
Serhl	0.0773691	0.0208333	24	9	3.27489	30.0405	49.7574	32.6315	29.5439
Unc5b	0.0773691	0.0208333	24	15	3.26595	14.2436	15.2019	20.0899	18.5931
Fads2	0.0773691	0.0208333	24	18	3.26037	10.1327	7.45439	10.5283	16.6666
1110067D22Rik	0.0773691	0.0208333	24	15	3.25909	10.8444	13.0517	26.6343	13.9171
Cbx3	0.0773691	0.0208333	24	3	3.25654	14.6921	9.75216	6.55319	8.68019
Bspry	0.0773691	0.0208333	24	15	3.25623	46.8531	53.1603	56.2303	53.2918
Ugt2a3	0.0773691	0.0208333	24	9	3.25303	2.43278	8.4767	3.85085	0.693798
BC017643	0.0773691	0.0208333	24	12	3.25251	17.7443	23.8332	26.1974	23.0868
Psmd10	0.0773691	0.0208333	24	9	3.24891	16.838	21.5662	20.3853	15.9242
Acox2	0.0773691	0.0208333	24	15	3.24563	3.95368	5.54948	14.4835	7.01369
G630090E17Rik	0.0773691	0.0208333	24	12	3.23643	13.818	17.1785	19.6589	13.8654
Nap1l4	0.0773691	0.0208333	24	6	3.23395	19.8841	22.2289	16.8047	16.1613
Lsm2	0.0773691	0.0208333	24	3	3.23357	14.3759	13.9076	9.48024	9.65735
Gpr137	0.0773691	0.0208333	24	15	3.23176	33.1396	33.5284	38.2978	37.511
Ppp3r1	0.0773691	0.0208333	24	15	3.22929	17.5367	18.018	23.1625	21.526
2310039H08Rik	0.0773691	0.0208333	24	6	3.22554	19.4687	20.5848	16.5672	14.3631
Atp11b	0.0773691	0.0208333	24	18	3.22518	23.2518	18.5934	24.3731	26.5943
1700021F05Rik	0.0773691	0.0208333	24	6	3.22207	16.8079	28.0659	15.4262	13.7701
Cpn1	0.0773691	0.0208333	24	12	3.22159	1.15971	4.19705	11.3313	3.84061
Tgif1	0.0773691	0.0208333	24	21	3.21871	10.1153	5.33254	5.98086	10.302
Kiss1	0.0773691	0.0208333	24	9	3.21791	4.85785	9.46656	8.86709	4.37419
Stard7	0.0773691	0.0208333	24	3	3.21741	18.8584	15.3427	12.3093	12.4363
Eif4b	0.0773691	0.0208333	24	0	3.20998	45.351	39.8924	39.3566	42.9772
Dalrd3	0.0773691	0.0208333	24	18	3.19637	16.5264	15.3359	19.8019	21.1011
Id2	0.0773691	0.0208333	24	15	3.19545	19.8347	21.3696	30.8535	22.8474
Trap1	0.0773691	0.0208333	24	3	3.19467	19.6217	17.4769	13.076	14.9867
Atxn7l3	0.0773691	0.0208333	24	18	3.19266	16.253	14.9738	18.6629	21.5941
Ifitm3	0.0773691	0.0208333	24	3	3.19057	61.6037	50.8832	47.8751	49.9721
Mtus1	0.0773691	0.0208333	24	12	3.18972	18.2171	21.2244	30.4305	19.8057
Fam13b	0.0773691	0.0208333	24	18	3.17137	19.0156	13.24	19.5323	22.0056
Llph	0.0773691	0.0208333	24	6	3.15822	21.2703	24.2399	18.7929	17.7845
Pigh	0.0773691	0.0208333	24	12	3.15462	11.9397	14.9139	24.9468	12.384
Dnajc30	0.0773691	0.0208333	24	9	3.14995	28.2876	40.211	30.0185	27.0487
Secisbp2l	0.0773691	0.0208333	24	21	3.14895	11.635	6.51645	9.24697	13.035
Srf	0.0773691	0.0208333	24	9	3.14125	16.3657	20.9135	20.0397	15.7027
Klc1	0.0773691	0.0208333	24	12	3.1381	11.5392	16.2243	18.8514	14.6606
Nfyc	0.0773691	0.0208333	24	9	3.13595	27.1125	33.9068	29.4984	26.5418
Gsk3a	0.0773691	0.0208333	24	12	3.12626	38.6535	43.1863	47.2548	42.9452
Gcg	0.0773691	0.0208333	24	3	3.12616	16.6226	10.3507	7.40333	9.33376
Mob3a	0.0773691	0.0208333	24	12	3.11653	9.10121	14.1688	16.5104	12.7631
Plekha7	0.0773691	0.0208333	24	21	3.11365	9.4904	6.55482	7.56195	14.9824
Eci2	0.0773691	0.0208333	24	6	3.1123	32.1535	44.0116	29.7357	29.2192
Dnajb2	0.0773691	0.0208333	24	15	3.10508	15.3051	17.0762	38.232	18.2326
Mef2d	0.0773691	0.0208333	24	21	3.10223	8.82924	5.90443	8.12029	13.9889
Dag1	0.0773691	0.0208333	24	18	3.09928	11.7492	6.82192	12.0916	15.2456
Tdrd7	0.0773691	0.0208333	24	12	3.0943	23.4093	28.0858	30.8293	26.7538
Aktip	0.0773691	0.0208333	24	12	3.09426	18.3505	21.7708	25.0201	19.6885
Ppp1r9b	0.0773691	0.0208333	24	15	3.09351	9.21307	9.75137	14.1413	13.5729
2310004I24Rik	0.0773691	0.0208333	24	9	3.09136	26.6142	30.7974	27.1999	22.6394
2310022B05Rik	0.0773691	0.0208333	24	15	3.08903	8.03516	8.07415	13.518	11.3284
Sertad3	0.0773691	0.0208333	24	9	3.08726	18.3172	21.2279	20.82	14.5123
Dctn1	0.0773691	0.0208333	24	15	3.08493	25.9658	39.1497	42.0582	39.9067
Tmem126a	0.0773691	0.0208333	24	6	3.08231	26.5731	29.2354	25.2222	21.8682
Zfp710	0.0773691	0.0208333	24	15	3.07846	12.5572	13.3642	17.6649	16.9637
Sdf2	0.0773691	0.0208333	24	9	3.07835	48.6789	71.8689	50.3021	47.3998
Frat2	0.0773691	0.0208333	24	6	3.07727	5.12596	9.22538	3.97949	1.66803
Crlf3	0.0773691	0.0208333	24	12	3.07637	5.53647	9.83619	10.686	6.28442
Zfand3	0.0773691	0.0208333	24	12	3.07217	22.9354	27.7816	30.2119	26.3687
Rwdd1	0.0773691	0.0208333	24	6	3.06043	22.2267	25.9193	19.9709	19.3413
Sgpl1	0.0773691	0.0208333	24	6	3.05799	79.2976	81.635	78.7519	48.7778
Creg1	0.0773691	0.0208333	24	3	3.05672	22.0572	17.2089	13.756	16.8644
Snhg12	0.0773691	0.0208333	24	6	3.05541	8.52754	9.4054	6.42382	2.86711
Ppp2r5a	0.0773691	0.0208333	24	15	3.0541	31.8367	31.9129	36.686	35.7019
Hn1l	0.0773691	0.0208333	24	21	3.05335	13.9639	9.48773	12.939	17.099
Kat5	0.0773691	0.0208333	24	6	3.04692	17.7585	22.6194	16.9792	14.7807
Vim	0.0773691	0.0208333	24	18	3.04682	26.6991	24.8533	28.0359	32.1342
5930434B04Rik	0.0773691	0.0208333	24	6	3.04063	17.6048	17.9518	14.866	12.0904
Rab11fip1	0.0773691	0.0208333	24	18	3.03801	18.7978	17.5025	21.8441	23.049
Rab43	0.0773691	0.0208333	24	18	3.03667	20.8419	15.5623	22.4098	23.7049
Alg5	0.0773691	0.0208333	24	6	3.036	24.8764	30.0715	24.8225	21.5383
1300001I01Rik	0.0773691	0.0208333	24	0	3.03588	11.9058	7.63824	6.23879	10.558
Dock6	0.0773691	0.0208333	24	15	3.02575	6.89783	8.76647	12.1519	12.0705
Smap1	0.0773691	0.0208333	24	12	3.02394	31.1492	34.0002	42.2893	31.8199
Snrpa	0.0773691	0.0208333	24	9	3.022	43.8772	48.5108	46.9445	43.0306
Serpinb5	0.0773691	0.0208333	24	15	3.02152	1.35193	2.72	7.84114	4.77695
Rad23b	0.0773691	0.0208333	24	0	3.02101	19.1604	15.2575	14.2116	18.8534
Oas3	0.0773691	0.0208333	24	12	3.02034	6.31251	14.4267	16.2012	13.3536
A1cf	0.0773691	0.0208333	24	21	3.01482	15.5339	9.74228	12.7285	15.5709
Ly6c1	0.0773691	0.0208333	24	15	3.01227	11.5127	13.832	21.9821	14.3527
Arg2	0.0773691	0.0208333	24	6	3.00867	68.3595	71.0354	68.1988	40.22
Ifi202b	0.0773691	0.0208333	24	18	3.00742	0.918052	0	4.67997	4.74436
Fam158a	0.0773691	0.0208333	24	6	3.00724	10.3879	14.6454	8.1225	7.55265
Tmem20	0.0773691	0.0208333	24	15	3.00637	41.2032	42.9196	46.7655	45.8606
Ttll3	0.0773691	0.0208333	24	18	3.00165	6.19682	4.98069	7.93015	11.7373
Lysmd4	0.0773691	0.0208333	24	18	3.00052	8.60952	8.47962	12.5829	12.993
BC016579	0.0773691	0.0208333	24	18	2.98456	6.26046	5.91048	9.68834	10.9242
Decr2	0.0773691	0.0208333	24	12	2.98014	23.9971	26.8068	31.7995	25.5113
0610007N19Rik	0.0773691	0.0208333	24	9	2.97507	4.57284	9.50052	6.98012	3.49302
2410002I01Rik	0.0773691	0.0208333	24	12	2.96879	17.6254	26.5488	27.6007	24.8017
Slc36a1	0.0773691	0.0208333	24	9	2.96491	7.19813	17.4595	8.76331	5.96797
Ift20	0.0773691	0.0208333	24	9	2.94439	98.6833	126.822	100.342	97.566
Alkbh3	0.0773691	0.0208333	24	6	2.93835	15.8277	20.6211	13.7711	13.0574
Tmem19	0.0773691	0.0208333	24	9	2.92785	31.9719	38.3831	33.5235	30.7631
Pop5	0.0773691	0.0208333	24	6	2.92774	12.8491	18.1006	12.1648	10.0888
Nmt1	0.0773691	0.0208333	24	6	2.92435	53.4992	59.1277	50.7628	50.7421
Asap2	0.0773691	0.0208333	24	21	2.92371	9.08769	5.12367	6.09151	10.397
Acat1	0.0773691	0.0208333	24	6	2.92212	18.7732	19.6658	16.1136	14.0604
Tspan14	0.0773691	0.0208333	24	0	2.92145	15.2164	11.3757	10.736	15.1584
Slc38a2	0.0773691	0.0208333	24	0	2.91964	17.0008	12.7211	10.7917	14.77
C630004H02Rik	0.0773691	0.0208333	24	12	2.9098	6.06305	10.3775	10.7346	6.81888
Sphk1	0.0773691	0.0208333	24	9	2.90267	2.27404	6.54425	4.66437	0.724588
Mycbp	0.0773691	0.0208333	24	9	2.89992	14.8808	17.9309	15.9447	10.7926
1500009L16Rik	0.0773691	0.0208333	24	0	2.89617	7.17045	3.32796	2.11916	6.46827
Rogdi	0.0773691	0.0208333	24	9	2.8945	8.6169	14.52	11.2171	8.48814
Pde4dip	0.0773691	0.0208333	24	21	2.89286	13.5107	9.55666	11.7266	15.9548
Gpbp1l1	0.0773691	0.0208333	24	21	2.8863	28.0768	24.278	25.2444	29.6093
AI661453	0.0773691	0.0208333	24	21	2.88351	13.0129	10.2943	10.7413	17.5783
Gata6	0.0773691	0.0208333	24	18	2.88309	13.4222	12.5694	16.7629	17.3833
Tac2	0.0773691	0.0208333	24	12	2.88226	0.911599	3.62902	16.0812	3.30289
Galnt4	0.0773691	0.0208333	24	21	2.87823	11.0248	7.23848	8.04676	12.4013
Tmod3	0.0773691	0.0208333	24	18	2.87457	18.8149	16.0923	19.2491	23.7886
Slc25a38	0.0773691	0.0208333	24	9	2.874	14.0378	19.2398	16.6478	13.7209
Tmem141	0.0773691	0.0208333	24	6	2.86851	7.56037	12.0059	7.25104	4.20186
Hbs1l	0.0773691	0.0208333	24	6	2.86014	22.3316	25.1288	19.9321	19.4386
Sar1a	0.0773691	0.0208333	24	6	2.85731	31.3585	33.4748	29.1614	27.5902
Pi4k2a	0.0773691	0.0208333	24	12	2.85194	18.8297	22.8248	26.4322	22.3608
Ccnb2	0.0773691	0.0208333	24	3	2.85068	10.3681	6.21469	3.23718	5.28267
Sdr39u1	0.0773691	0.0208333	24	0	2.85067	41.9489	38.4904	36.3156	40.92
Rps19bp1	0.0773691	0.0208333	24	6	2.84777	17.3412	21.2124	16.6762	13.8227
Rpusd3	0.0773691	0.0208333	24	12	2.84587	3.81536	7.36423	8.64051	4.14004
Hmgb3	0.0773691	0.0208333	24	6	2.84441	12.23	13.1163	8.98746	8.31362
Mat2b	0.0773691	0.0208333	24	21	2.83879	23.8025	19.9172	20.2259	24.3699
Ergic1	0.0773691	0.0208333	24	0	2.83848	11.016	6.65743	6.46483	10.1347
Ppp5c	0.0773691	0.0208333	24	15	2.83727	22.5174	23.3552	27.7595	26.1381
Gmfg	0.0773691	0.0208333	24	6	2.82952	15.8584	26.1329	15.4017	13.1907
Sec14l1	0.0773691	0.0208333	24	15	2.82072	10.6485	12.562	17.4526	13.7361
Gm2382	0.0773691	0.0208333	24	12	2.82063	6.37694	10.8604	11.1264	7.63192
Nudt2	0.0773691	0.0208333	24	9	2.81807	19.4669	24.7647	20.5232	17.8503
1110065P20Rik	0.0773691	0.0208333	24	9	2.81725	11.6791	15.9206	13.492	9.7651
Mustn1	0.0773691	0.0208333	24	6	2.81408	6.11388	7.80458	2.98483	2.97422
Hspb6	0.0773691	0.0208333	24	3	2.81371	7.34522	3.49771	0.84492	1.07745
Gna13	0.0773691	0.0208333	24	18	2.80386	19.0518	16.5583	21.2251	22.3155
3230401D17Rik	0.0773691	0.0208333	24	21	2.80142	31.6591	26.4361	31.5714	34.272
Tarbp2	0.0773691	0.0208333	24	9	2.79707	22.9936	29.3431	23.5041	20.867
Sorbs1	0.0773691	0.0208333	24	18	2.79611	13.0186	8.38537	14.687	15.6548
Mrps22	0.0773691	0.0208333	24	0	2.79567	13.5999	9.76623	8.75993	12.8336
Cenpa	0.0773691	0.0208333	24	3	2.79252	9.13185	5.26008	2.62727	3.73105
2310010J17Rik	0.0773691	0.0208333	24	9	2.78997	4.07346	10.4328	5.07567	2.44526
Pdcd2	0.0773691	0.0208333	24	6	2.78864	10.2959	12.763	7.98112	7.19031
Glod4	0.0773691	0.0208333	24	6	2.77748	14.8609	14.9611	11.0426	10.9235
E2f2	0.0773691	0.0208333	24	0	2.77668	10.375	6.85353	3.48508	7.81726
Gm20605	0.0773691	0.0208333	24	18	2.77077	6.36711	4.81255	9.08491	9.93166
Dazap1	0.0773691	0.0208333	24	12	2.75432	22.2458	30.9448	31.7726	29.1758
Prkcd	0.0773691	0.0208333	24	21	2.74775	94.24	91.6494	92.7851	127.72
Ip6k1	0.0773691	0.0208333	24	12	2.74739	26.8047	31.1205	33.2516	29.7966
0610037L13Rik	0.0773691	0.0208333	24	6	2.74501	11.4166	14.1991	8.88622	8.82858
1110058L19Rik	0.0773691	0.0208333	24	6	2.74392	13.9725	16.9974	13.7842	9.42471
Pdk3	0.0773691	0.0208333	24	12	2.74251	19.1651	24.0794	25.8545	23.0118
Ino80c	0.0773691	0.0208333	24	9	2.74149	15.8103	19.6176	18.523	14.5762
Wbp11	0.0773691	0.0208333	24	18	2.74014	11.6872	10.2942	13.4692	16.2625
Spaca4	0.0773691	0.0208333	24	18	2.73907	4.61747	1.70994	5.09619	8.97849
Cebpa	0.0773691	0.0208333	24	21	2.73841	16.2183	13.6365	15.0109	21.5481
Sf3b5	0.0773691	0.0208333	24	6	2.73831	41.2028	54.6012	40.9616	38.6211
Mob2	0.0773691	0.0208333	24	3	2.73781	22.7095	21.9791	17.1252	19.8197
Snhg8	0.0773691	0.0208333	24	6	2.73103	9.71912	11.6346	7.58645	6.04274
Pcbp2	0.0773691	0.0208333	24	18	2.73053	39.901	36.8078	39.9406	44.4913
Txndc15	0.0773691	0.0208333	24	9	2.73032	22.29	27.1164	22.73	19.8339
Fhit	0.0773691	0.0208333	24	12	2.72983	2.56256	6.51688	8.47668	4.70988
Camta2	0.0773691	0.0208333	24	21	2.72887	28.8768	26.304	27.2013	41.1842
Xkr9	0.0773691	0.0208333	24	9	2.71996	13.861	16.4254	16.3296	10.4068
Akap13	0.0773691	0.0208333	24	18	2.7189	7.07855	4.86987	8.94432	10.6943
Tmx2	0.0773691	0.0208333	24	3	2.71875	37.6459	35.9315	31.957	33.9306
Slc4a4	0.0773691	0.0208333	24	18	2.71872	18.5242	14.8852	19.3525	21.7466
Samd9l	0.0773691	0.0208333	24	18	2.71616	12.4402	8.81335	13.797	15.139
Tmed9	0.0773691	0.0208333	24	0	2.71126	40.2163	36.0874	35.5812	39.1209
Luzp1	0.0773691	0.0208333	24	18	2.70638	28.1317	25.7248	28.2764	34.1098
Prlr	0.0773691	0.0208333	24	18	2.70532	15.6419	12.8441	16.8668	19.271
Pdlim5	0.0773691	0.0208333	24	15	2.70359	14.5885	14.9285	19.4517	17.7122
Med6	0.0773691	0.0208333	24	3	2.70175	22.9102	21.3905	17.6923	18.9667
Ilk	0.0773691	0.0208333	24	15	2.69659	29.4446	33.0554	36.2492	33.8779
Rap2c	0.0773691	0.0208333	24	21	2.68124	22.6594	12.9192	21.8667	24.3946
Rab21	0.0773691	0.0208333	24	15	2.68085	15.0025	16.8809	20.99	18.476
Rnf181	0.0773691	0.0208333	24	6	2.68029	132.815	137.066	132.365	129.935
Eny2	0.0773691	0.0208333	24	6	2.67774	13.6658	17.002	12.603	10.491
Pcnp	0.0773691	0.0208333	24	21	2.67117	27.1462	22.4718	25.6315	28.5123
1700016C15Rik	0.0773691	0.0208333	24	6	2.67023	7.37477	10.3873	6.09873	4.11079
Gstt3	0.0773691	0.0208333	24	3	2.66572	29.3821	28.0274	23.6939	26.1758
BC029722	0.0773691	0.0208333	24	12	2.66381	11.0063	14.6106	15.7419	11.8118
R3hdm2	0.0773691	0.0208333	24	15	2.66258	10.7753	11.3759	14.9913	14.6908
Ncor1	0.0773691	0.0208333	24	21	2.66201	14.428	9.86011	12.6015	15.5629
Ddx17	0.0773691	0.0208333	24	21	2.65929	51.6527	39.0073	50.273	52.7802
Abi1	0.0773691	0.0208333	24	21	2.6566	24.25	20.0752	23.0182	26.3574
2010320M18Rik	0.0773691	0.0208333	24	6	2.65507	9.73878	11.7726	7.39795	6.60377
Pcgf3	0.0773691	0.0208333	24	18	2.65093	6.42446	5.74878	8.8852	10.786
Spon2	0.0773691	0.0208333	24	0	2.6505	7.87835	3.93004	1.49583	5.04428
2810474O19Rik	0.0773691	0.0208333	24	21	2.64589	10.7093	7.07224	7.35386	11.2005
Fars2	0.0773691	0.0208333	24	6	2.64464	9.65104	15.1288	7.96672	7.15765
Trappc10	0.0773691	0.0208333	24	18	2.64306	16.5674	15.4663	17.9582	22.9254
Dhx15	0.0773691	0.0208333	24	21	2.63871	14.0002	8.65364	13.0771	15.5649
Serinc1	0.0773691	0.0208333	24	21	2.63825	17.7612	13.3242	17.4069	20.432
Cuedc2	0.0773691	0.0208333	24	6	2.63767	10.521	18.114	9.82254	8.03418
Shc1	0.0773691	0.0208333	24	18	2.63684	22.4645	21.8306	24.6021	27.1511
Gmip	0.0773691	0.0208333	24	15	2.63595	10.0422	10.7925	15.2642	13.0261
Col4a1	0.0773691	0.0208333	24	0	2.63441	13.1629	8.86212	7.25594	10.4064
Aifm1	0.0773691	0.0208333	24	6	2.6338	25.117	26.6088	22.6709	21.6054
Scamp5	0.0773691	0.0208333	24	6	2.62694	23.3042	26.1601	21.3026	20.7316
Gbf1	0.0773691	0.0208333	24	15	2.62651	15.2141	16.7454	22.3129	17.6904
Adam10	0.0773691	0.0208333	24	18	2.60693	17.3125	14.7622	19.4193	20.0289
Pfdn4	0.0773691	0.0208333	24	3	2.60438	12.1804	10.8607	7.60606	8.06873
H2-Q8	0.0773691	0.0208333	24	18	2.60219	14.5578	12.981	15.8308	19.0681
Sbf1	0.0773691	0.0208333	24	15	2.60136	7.91974	9.31839	12.3288	12.2671
Kif21b	0.0773691	0.0208333	24	15	2.60061	5.02636	5.04685	9.03371	8.39514
Hsd3b7	0.0773691	0.0208333	24	15	2.58522	19.51	20.8496	25.283	22.3887
Ets2	0.0773691	0.0208333	24	18	2.58373	34.4622	33.6558	37.4382	37.9877
Cry2	0.0773691	0.0208333	24	15	2.58328	4.27252	4.37071	14.3181	6.70806
Fam89b	0.0773691	0.0208333	24	12	2.57783	9.89128	16.9039	17.952	15.5216
Sub1	0.0773691	0.0208333	24	6	2.57631	13.9506	16.8041	12.287	11.1808
Mfsd7a	0.0773691	0.0208333	24	12	2.57043	3.47528	6.32258	8.76851	4.34554
Ciita	0.0773691	0.0208333	24	21	2.56969	9.61774	5.09485	9.2443	11.9896
Hsd11b2	0.0773691	0.0208333	24	15	2.56868	3.48788	5.23964	8.87638	7.11647
Hnrnph2	0.0773691	0.0208333	24	18	2.5634	12.0486	7.97752	13.7961	14.4654
Bgn	0.0773691	0.0208333	24	21	2.56301	23.4993	18.7116	22.3281	24.7897
4933434E20Rik	0.0773691	0.0208333	24	3	2.56149	23.0177	22.3465	18.2846	19.8346
Rtn4	0.0773691	0.0208333	24	15	2.55856	13.2006	15.7831	18.2361	17.9843
Api5	0.0773691	0.0208333	24	0	2.55789	19.4024	12.6672	11.8937	14.3053
Srsf11	0.0773691	0.0208333	24	18	2.55531	18.9863	14.8757	19.5441	21.5454
Slc5a12	0.0773691	0.0208333	24	12	2.55436	7.48735	9.89562	19.4768	8.98878
Nr1i3	0.0773691	0.0208333	24	9	2.5534	2.81392	7.4961	4.13676	1.59683
Dvl1	0.0773691	0.0208333	24	18	2.55209	24.1005	22.9351	25.3725	28.8815
Derl2	0.0773691	0.0208333	24	6	2.55007	18.8229	20.4248	18.0161	14.0189
Mettl21d	0.0773691	0.0208333	24	12	2.5497	9.81625	14.4009	14.8924	12.2654
1110057K04Rik	0.0773691	0.0208333	24	0	2.54894	16.3575	13.1066	11.9501	15.9087
Cln5	0.0773691	0.0208333	24	15	2.54866	11.361	11.4182	15.5745	14.4134
1700020I14Rik	0.0773691	0.0208333	24	12	2.54848	18.6314	22.3375	24.2897	20.7876
Fcho2	0.0773691	0.0208333	24	21	2.5484	7.51326	3.94923	5.46786	9.11179
Rnd2	0.0773691	0.0208333	24	12	2.54549	9.28515	12.7856	13.2932	9.59391
Lmtk2	0.0773691	0.0208333	24	21	2.54357	14.7541	12.356	13.8006	19.4043
Gm8615	0.0773691	0.0208333	24	9	2.54343	6.31029	11.0713	6.35557	3.92267
Slc25a34	0.0773691	0.0208333	24	0	2.53792	12.1598	9.0384	6.87068	10.9276
Slc37a3	0.0773691	0.0208333	24	15	2.53763	11.1793	11.6812	16.8311	13.5718
Tjap1	0.0773691	0.0208333	24	12	2.53657	14.9361	21.3246	22.427	20.0355
5730469M10Rik	0.0773691	0.0208333	24	6	2.53551	12.1867	13.3488	10.9583	6.20429
Vps35	0.0773691	0.0208333	24	21	2.52762	25.3562	21.469	24.1719	27.4339
Mapk8ip3	0.0773691	0.0208333	24	15	2.52567	7.49543	7.54321	11.7658	10.4165
2310044G17Rik	0.0773691	0.0208333	24	12	2.52455	2.9831	5.36327	14.9267	4.25648
Slc38a10	0.0773691	0.0208333	24	3	2.52236	29.0598	27.822	24.4354	25.3121
Tfg	0.0773691	0.0208333	24	15	2.52225	131.078	141.772	144.15	141.821
Galk1	0.0773691	0.0208333	24	6	2.52091	9.48288	10.7171	6.85655	6.21322
Plekha3	0.0773691	0.0208333	24	18	2.5174	7.25574	6.36916	9.88108	10.8641
Gm17821	0.0773691	0.0208333	24	12	2.51689	7.75691	12.0669	12.3217	9.51285
Zc3hav1	0.0773691	0.0208333	24	21	2.51642	14.9558	11.3199	13.5115	16.9931
D10Jhu81e	0.0773691	0.0208333	24	6	2.51589	15.1891	20.9731	15.0589	12.8171
Ovol2	0.0773691	0.0208333	24	9	2.51083	7.08804	12.4351	8.11303	5.7458
2023-03-07	0.0773691	0.0208333	24	21	2.50715	7.3132	3.17601	4.64731	7.60142
Rab35	0.0773691	0.0208333	24	12	2.50602	26.1036	37.3482	37.4995	35.1368
Sirt2	0.0773691	0.0208333	24	15	2.49976	25.736	30.9904	33.3472	31.144
Myo19	0.0773691	0.0208333	24	18	2.49779	7.29745	6.20787	9.40424	11.1659
Cops4	0.0773691	0.0208333	24	6	2.49633	29.8957	32.6604	28.0461	27.4493
Dhx9	0.0773691	0.0208333	24	21	2.49587	7.54214	3.94117	4.71733	8.17575
Urgcp	0.0773691	0.0208333	24	12	2.49552	17.4495	21.5311	21.6691	18.6923
Plp2	0.0773691	0.0208333	24	3	2.48799	42.1235	30.4303	28.0846	29.6113
Cct4	0.0773691	0.0208333	24	3	2.48757	38.8252	37.3063	34.0648	35.0308
Ppie	0.0773691	0.0208333	24	6	2.48574	9.05091	9.44012	5.75714	5.70315
1110021L09Rik	0.0773691	0.0208333	24	0	2.47781	19.435	13.4129	12.1618	14.4979
3110040N11Rik	0.0773691	0.0208333	24	6	2.47128	9.97269	11.0681	7.47291	6.57804
2310061C15Rik	0.0773691	0.0208333	24	6	2.47124	6.35354	8.37288	4.26843	3.46827
Cacna1d	0.0773691	0.0208333	24	9	2.4707	5.96847	9.60825	7.50972	4.16131
Rragd	0.0773691	0.0208333	24	3	2.46978	7.4464	4.8322	2.11929	3.17371
Ptpn6	0.0773691	0.0208333	24	15	2.46409	14.4257	17.3097	20.0722	18.6327
Dapk2	0.0773691	0.0208333	24	9	2.45978	12.0718	16.4237	14.2124	11.607
Nipal1	0.0773691	0.0208333	24	12	2.45437	16.0154	22.4994	24.6433	22.3293
Cox16	0.0773691	0.0208333	24	6	2.45416	11.0776	13.3707	8.8588	8.6481
Sod2	0.0773691	0.0208333	24	12	2.45101	13.2655	16.7813	17.0896	13.6729
8430410A17Rik	0.0773691	0.0208333	24	12	2.45005	12.201	16.033	16.6998	13.602
1110008F13Rik	0.0773691	0.0208333	24	9	2.44712	14.2907	18.5538	15.4466	12.7882
Atp5sl	0.0773691	0.0208333	24	9	2.44521	11.3658	15.844	13.4525	11.0146
Hspa4	0.0773691	0.0208333	24	3	2.43644	22.9396	20.5563	17.567	19.0376
Rasd2	0.0773691	0.0208333	24	12	2.43565	1.95121	5.37875	6.3773	2.91577
Acnat1	0.0773691	0.0208333	24	18	2.43513	11.2845	8.3213	12.8804	13.613
H2afx	0.0773691	0.0208333	24	0	2.4346	22.0889	19.6202	15.3455	19.7629
Fam84b	0.0773691	0.0208333	24	21	2.43357	9.3117	5.15531	7.49671	10.2235
Alox5ap	0.0773691	0.0208333	24	12	2.4307	1.25236	4.59278	6.04775	2.5131
Rbks	0.0773691	0.0208333	24	9	2.42806	19.9447	24.2832	22.187	19.6579
Apbb3	0.0773691	0.0208333	24	12	2.42469	4.16512	6.45114	11.2403	6.39683
Lrrc8b	0.0773691	0.0208333	24	18	2.42379	4.9642	2.10836	6.81463	7.24937
Nop56	0.0773691	0.0208333	24	3	2.42377	18.8207	10.2401	7.95495	9.38471
Stim1	0.0773691	0.0208333	24	15	2.41916	4.18329	4.23675	8.04533	7.21712
Psmd5	0.0773691	0.0208333	24	15	2.41413	10.1582	11.2953	14.8562	13.4255
Fasn	0.0773691	0.0208333	24	15	2.41141	4.91985	5.14459	22.4069	7.19335
Agfg1	0.0773691	0.0208333	24	15	2.4113	11.5625	11.6126	16.7205	13.8359
Farsb	0.0773691	0.0208333	24	0	2.41127	16.588	13.3677	10.481	14.0808
1700113A16Rik	0.0773691	0.0208333	24	6	2.40983	11.0688	14.1087	9.82449	8.53699
Tmco3	0.0773691	0.0208333	24	18	2.406	13.6395	11.771	14.0394	18.4502
Mical2	0.0773691	0.0208333	24	18	2.40354	6.27706	5.3338	8.99501	9.41408
Plekha6	0.0773691	0.0208333	24	18	2.40303	13.7584	11.5319	13.7975	18.6873
Eef1d	0.0773691	0.0208333	24	9	2.40006	33.9349	55.978	34.2119	31.9491
Rnf6	0.0773691	0.0208333	24	18	2.39932	15.9083	10.3786	16.6725	18.1704
Top1	0.0773691	0.0208333	24	18	2.39868	15.9471	10.7473	16.5598	18.2086
Drg1	0.0773691	0.0208333	24	3	2.39737	24.2037	23.1605	20.1861	20.3973
Sh2b1	0.0773691	0.0208333	24	15	2.39582	12.4745	14.7022	17.0117	16.9414
Ppp1r13b	0.0773691	0.0208333	24	18	2.39387	12.2184	11.4694	14.589	15.8697
Snx12	0.0773691	0.0208333	24	12	2.39207	13.393	17.4897	18.7334	16.0643
Coq2	0.0773691	0.0208333	24	0	2.39027	15.0778	11.1213	8.9221	11.7263
Nelf	0.0773691	0.0208333	24	15	2.3831	8.60227	11.4511	15.2907	11.5031
Rapgefl1	0.0773691	0.0208333	24	12	2.37608	7.47124	10.3212	12.7936	8.92298
Col1a2	0.0773691	0.0208333	24	0	2.3625	12.8954	6.98848	6.535	8.76239
Rbm6	0.0773691	0.0208333	24	0	2.35265	19.7917	16.4191	15.3385	18.6202
Klf13	0.0773691	0.0208333	24	12	2.35175	5.14239	8.26571	9.74795	6.21953
Tcta	0.0773691	0.0208333	24	12	2.35127	17.5155	21.3956	22.2546	19.4843
Map3k12	0.0773691	0.0208333	24	6	2.34155	13.1907	15.492	11.3586	10.7012
Pak2	0.0773691	0.0208333	24	21	2.34081	22.102	18.2485	21.2225	23.9898
1700011H14Rik	0.0773691	0.0208333	24	12	2.34077	20.2029	45.6204	47.4404	45.2335
Phactr4	0.0773691	0.0208333	24	18	2.34018	9.71784	8.80642	12.4519	12.6914
Bcat2	0.0773691	0.0208333	24	12	2.33747	5.59497	8.90241	8.91022	5.60631
Nhej1	0.0773691	0.0208333	24	9	2.33709	7.18555	12.8494	8.23497	6.03154
Nudt19	0.0773691	0.0208333	24	6	2.33282	23.9746	25.7673	23.5679	18.9305
Ubxn8	0.0773691	0.0208333	24	6	2.3327	11.4895	13.1261	9.8247	8.19303
Xiap	0.0773691	0.0208333	24	21	2.3325	14.2604	7.22647	13.0434	15.2425
1810030N24Rik	0.0773691	0.0208333	24	9	2.33203	9.22849	11.7301	10.8695	6.77513
2810002N01Rik	0.0773691	0.0208333	24	9	2.33131	13.3216	15.902	13.6751	9.66157
Dab2ip	0.0773691	0.0208333	24	18	2.32871	17.3874	15.9842	19.2237	20.7345
Aadac	0.0773691	0.0208333	24	9	2.32838	4.07554	7.26684	4.77956	1.38522
Fam48a	0.0773691	0.0208333	24	21	2.32732	5.86012	2.48722	5.78598	8.99573
LOC545261	0.0773691	0.0208333	24	3	2.32655	5.899	4.36463	1.63716	2.04598
Tmem135	0.0773691	0.0208333	24	0	2.32449	15.438	5.85632	3.89093	6.08248
Gcdh	0.0773691	0.0208333	24	6	2.31862	8.60522	10.2207	6.34863	5.91924
Mfsd11	0.0773691	0.0208333	24	9	2.31754	13.1259	16.788	15.7176	12.8247
Rbm8a	0.0773691	0.0208333	24	9	2.31712	17.5966	23.4929	17.7701	15.5855
Bmp1	0.0773691	0.0208333	24	15	2.29625	4.07346	4.43453	8.24271	6.76006
Plagl2	0.0773691	0.0208333	24	21	2.2924	8.36488	5.2498	5.63222	9.00102
Ppm1b	0.0773691	0.0208333	24	9	2.29078	25.2154	27.4789	27.3181	23.1023
Rab5a	0.0773691	0.0208333	24	21	2.28933	22.6193	17.6593	22.5556	24.714
Fa2h	0.0773691	0.0208333	24	15	2.28866	0.425629	1.95113	9.92257	2.5834
Dnajb6	0.0773691	0.0208333	24	12	2.28611	34.9998	38.416	40.8017	37.7518
Als2	0.0773691	0.0208333	24	9	2.27793	5.49001	8.76331	5.84965	2.67998
Ereg	0.0773691	0.0208333	24	18	2.27625	6.97248	4.08119	7.12777	10.3641
Fbxo4	0.0773691	0.0208333	24	12	2.2727	5.33821	7.94501	9.43779	5.61642
Anapc5	0.0773691	0.0208333	24	6	2.27066	20.9858	21.7538	19.418	16.8992
Bmp8b	0.0773691	0.0208333	24	15	2.2675	2.80737	3.69194	6.54311	6.36966
Matk	0.0773691	0.0208333	24	12	2.25708	1.37991	5.17321	6.49575	3.90506
Immp2l	0.0773691	0.0208333	24	12	2.25707	5.61084	9.77433	10.808	8.58752
Arhgef11	0.0773691	0.0208333	24	18	2.25636	5.68094	3.9016	6.58187	9.38261
Rsl1d1	0.0773691	0.0208333	24	0	2.25518	14.0039	10.5435	8.22788	11.1461
Recql5	0.0773691	0.0208333	24	18	2.25197	10.0946	8.85892	10.9821	14.904
Fntb	0.0773691	0.0208333	24	12	2.24627	8.33548	12.1331	13.0772	10.5214
Gse1	0.0773691	0.0208333	24	15	2.24326	11.0446	11.0893	14.3506	14.1282
Grhpr	0.0773691	0.0208333	24	12	2.24046	5.51384	9.36341	11.0577	8.5703
Dnmbp	0.0773691	0.0208333	24	18	2.23937	6.38003	3.42997	8.45878	8.49133
Immp1l	0.0773691	0.0208333	24	9	2.2376	28.0938	31.0506	28.4118	25.0397
Atg3	0.0773691	0.0208333	24	15	2.23693	23.3053	24.599	29.6289	25.4143
Tbl1x	0.0773691	0.0208333	24	18	2.23417	5.15807	2.94942	5.82991	8.59677
Mdm4	0.0773691	0.0208333	24	21	2.231	6.41875	2.64461	4.74815	7.28423
Hcst	0.0773691	0.0208333	24	9	2.23007	8.04075	16.6284	10.0421	7.93957
Epb4.1l1	0.0773691	0.0208333	24	21	2.22892	9.42265	6.66619	7.27623	10.8241
Mrpl3	0.0773691	0.0208333	24	3	2.22622	14.4454	12.5232	9.0714	11.6005
Arfgap3	0.0773691	0.0208333	24	12	2.22371	50.0872	53.107	55.3608	52.091
Mrpl40	0.0773691	0.0208333	24	6	2.22357	29.6871	30.341	28.2446	22.5848
Wasl	0.0773691	0.0208333	24	21	2.21904	22.822	18.9548	20.6776	23.0868
Edem1	0.0773691	0.0208333	24	21	2.21604	40.4946	34.7432	40.017	42.1063
Mrpl50	0.0773691	0.0208333	24	3	2.21355	15.1889	13.2008	9.92953	12.1993
Ociad1	0.0773691	0.0208333	24	0	2.21126	58.3663	51.6324	51.2168	53.3016
Dync1i2	0.0773691	0.0208333	24	15	2.20837	30.851	34.3694	36.5439	34.9227
Eepd1	0.0773691	0.0208333	24	9	2.20745	13.3655	15.4467	15.0502	6.49745
Cmtm4	0.0773691	0.0208333	24	18	2.20426	16.3361	15.2389	17.3171	20.6374
Rxra	0.0773691	0.0208333	24	15	2.20119	22.1048	30.9326	33.0079	31.9645
Tomm20	0.0773691	0.0208333	24	6	2.20095	9.70098	13.5032	8.85365	7.6259
Taf12	0.0773691	0.0208333	24	12	2.20055	21.2988	25.1582	25.9512	23.5865
Ppm1g	0.0773691	0.0208333	24	0	2.20016	20.696	18.3354	16.749	20.6114
A430005L14Rik	0.0773691	0.0208333	24	6	2.20002	18.7609	20.8453	16.7386	16.645
Ccl28	0.0773691	0.0208333	24	21	2.19935	7.58787	5.5143	6.85897	16.2873
Abcb8	0.0773691	0.0208333	24	6	2.1874	14.63	16.5994	12.5677	12.4748
Fbxw9	0.0773691	0.0208333	24	12	2.18407	7.86481	10.3806	11.8033	8.14161
Rbm14	0.0773691	0.0208333	24	18	2.18155	9.63519	9.37886	12.2668	12.9176
Rexo2	0.0773691	0.0208333	24	0	2.17883	16.7422	11.1721	9.94938	12.0036
Jak1	0.0773691	0.0208333	24	21	2.17594	16.9678	13.2262	15.6515	18.0644
Snap23	0.0773691	0.0208333	24	18	2.17329	13.705	11.9842	15.1013	16.7349
Srprb	0.0773691	0.0208333	24	3	2.17294	16.9044	15.9582	13.2586	13.458
Furin	0.0773691	0.0208333	24	15	2.17089	16.6365	17.4062	20.1298	20.0531
Arpp19	0.0773691	0.0208333	24	9	2.16873	12.892	17.8146	13.6057	11.561
Fam83b	0.0773691	0.0208333	24	21	2.16371	8.52268	3.04433	7.62586	9.66583
1190007I07Rik	0.0773691	0.0208333	24	9	2.1625	7.47139	10.7515	9.19031	6.35396
Apol7c	0.0773691	0.0208333	24	21	2.16193	7.44126	4.72609	5.2895	8.68918
Slc30a4	0.0773691	0.0208333	24	21	2.15851	14.9622	11.2083	14.6262	16.9775
Cux1	0.0773691	0.0208333	24	12	2.15558	18.4133	26.0655	26.1038	24.0715
Arhgap5	0.0773691	0.0208333	24	21	2.15326	7.38648	1.64625	5.38347	7.41358
Minpp1	0.0773691	0.0208333	24	15	2.15226	19.0185	21.0135	24.3677	21.7518
Nme3	0.0773691	0.0208333	24	6	2.149	20.0325	31.8842	18.6003	18.0064
Tnks2	0.0773691	0.0208333	24	0	2.14435	10.9808	8.04153	7.81963	10.9455
Numa1	0.0773691	0.0208333	24	18	2.14393	9.60735	8.27708	10.2984	13.7719
Snhg5	0.0773691	0.0208333	24	3	2.14249	7.26573	5.74593	3.27677	3.67501
Vsig10	0.0773691	0.0208333	24	3	2.14192	13.5118	11.7725	8.43743	10.7886
Gstz1	0.0773691	0.0208333	24	6	2.13914	21.6512	23.0875	21.0707	13.8337
Ccz1	0.0773691	0.0208333	24	3	2.13861	39.2938	38.756	35.9846	36.0163
Tomm40l	0.0773691	0.0208333	24	6	2.1385	5.25781	8.18793	4.02942	3.24161
Fdx1l	0.0773691	0.0208333	24	9	2.13596	12.8192	19.4468	12.9056	10.8918
Tdp2	0.0773691	0.0208333	24	0	2.13415	16.3921	11.1798	11.0556	13.0677
Dynll2	0.0773691	0.0208333	24	0	2.13235	62.2214	48.49	47.802	49.8124
Cdca7	0.0773691	0.0208333	24	0	2.13107	6.64726	3.08652	3.07008	5.53693
Mrps17	0.0773691	0.0208333	24	6	2.12942	16.7701	17.1597	14.3266	13.5803
Srd5a3	0.0773691	0.0208333	24	12	2.12853	12.3139	14.3207	18.7051	12.6481
Ssrp1	0.0773691	0.0208333	24	3	2.12648	15.237	14.6838	10.8968	13.0094
Erap1	0.0773691	0.0208333	24	21	2.12638	13.3557	10.5813	10.795	14.0349
Atf5	0.0773691	0.0208333	24	12	2.12363	5.47328	7.78472	10.3585	6.66342
Rnps1	0.0773691	0.0208333	24	12	2.1227	39.1362	43.8553	45.5786	43.5773
Opa3	0.0773691	0.0208333	24	18	2.11767	7.36901	4.76227	7.82266	10.2983
3110062M04Rik	0.0773691	0.0208333	24	3	2.1157	27.9726	27.4112	14.9894	25.9779
Bcl7c	0.0773691	0.0208333	24	9	2.11217	7.55442	16.3007	8.18859	6.19722
Rcbtb1	0.0773691	0.0208333	24	3	2.10919	15.1018	12.7402	10.0602	11.8161
Smox	0.0773691	0.0208333	24	18	2.10569	22.2644	19.645	23.4746	24.3906
Rab14	0.0773691	0.0208333	24	15	2.10371	32.5246	34.6728	37.0979	36.0497
Commd5	0.0773691	0.0208333	24	6	2.10325	19.4642	22.3437	18.4235	17.4355
Sh3glb1	0.0773691	0.0208333	24	15	2.10301	26.1358	28.0101	31.0539	29.0402
Elmo2	0.0773691	0.0208333	24	12	2.10295	6.0039	7.98658	11.4285	7.1096
Ltv1	0.0773691	0.0208333	24	3	2.10146	11.9064	11.2735	8.51561	8.72045
Cyfip1	0.0773691	0.0208333	24	15	2.10096	12.593	12.6543	16.4962	14.6935
Dnajc11	0.0773691	0.0208333	24	3	2.09863	13.128	11.574	8.75248	10.0137
Pax8	0.0773691	0.0208333	24	15	2.09728	4.33182	5.79881	13.7286	6.30915
Set	0.0773691	0.0208333	24	0	2.09703	24.7683	18.2745	16.367	18.3441
Ppil1	0.0773691	0.0208333	24	0	2.09639	24.0111	22.0346	19.6792	23.8404
Serpina1b	0.0773691	0.0208333	24	9	2.09574	7.27455	13.2919	7.81102	5.83514
Ttc39a	0.0773691	0.0208333	24	12	2.09222	7.7748	10.4067	13.4523	10.1665
Naa35	0.0773691	0.0208333	24	3	2.0912	18.9683	18.6849	14.7463	16.9921
Arl8b	0.0773691	0.0208333	24	0	2.0866	22.0219	19.8634	17.5087	21.252
Ankrd54	0.0773691	0.0208333	24	9	2.08547	12.6424	15.961	14.295	11.715
Fryl	0.0773691	0.0208333	24	21	2.08506	8.98587	5.5491	8.61604	11.0767
Drosha	0.0773691	0.0208333	24	9	2.08416	8.19177	11.4637	10.6639	8.04093
Olfm4	0.0773691	0.0208333	24	0	2.08095	47.1286	0.982427	0.517957	2.4799
6330578E17Rik	0.0773691	0.0208333	24	3	2.07762	21.7463	19.8169	16.635	19.0518
Fam102b	0.0773691	0.0208333	24	18	2.0772	7.66016	6.8185	9.87377	10.4801
Larp4b	0.0773691	0.0208333	24	18	2.074	9.06791	5.42879	9.92433	11.0233
Mcm7	0.0773691	0.0208333	24	0	2.07257	10.0706	4.85947	3.32926	5.2833
Sema6a	0.0773691	0.0208333	24	21	2.07009	15.0217	10.8202	13.3716	15.3233
Dennd2d	0.0773691	0.0208333	24	3	2.06945	26.9542	25.7658	17.8697	25.0031
Nfs1	0.0773691	0.0208333	24	6	2.06846	15.2197	15.5497	12.9765	11.9424
2700097O09Rik	0.0773691	0.0208333	24	0	2.0634	12.1335	8.98825	8.26468	10.9556
Eif2ak1	0.0773691	0.0208333	24	15	2.0615	24.2273	30.3404	32.284	31.6721
Syt7	0.0773691	0.0208333	24	12	2.05749	2.3788	4.51348	6.87709	3.19232
Dpt	0.0773691	0.0208333	24	0	2.05703	9.79238	5.36374	5.09963	7.03902
Ssbp1	0.0773691	0.0208333	24	3	2.05703	12.5468	11.0414	8.5523	9.21775
Vipar	0.0773691	0.0208333	24	6	2.05602	18.3241	18.8699	16.0137	15.365
BC003266	0.0773691	0.0208333	24	9	2.05556	13.8536	16.6962	15.9771	13.0057
Snx25	0.0773691	0.0208333	24	12	2.05471	19.8748	22.4534	23.6418	20.4088
Ccdc28a	0.0773691	0.0208333	24	6	2.05132	13.2385	17.6148	11.7493	11.3045
Gm5431	0.0773691	0.0208333	24	0	2.04951	13.1952	11.2629	7.20215	12.6618
Slain2	0.0773691	0.0208333	24	18	2.04675	10.1028	8.54842	12.1123	12.328
Capn7	0.0773691	0.0208333	24	21	2.04628	10.262	6.57653	8.18871	10.291
Rabggta	0.0773691	0.0208333	24	9	2.04485	5.38004	9.05842	7.38238	5.27704
Cpne1	0.0773691	0.0208333	24	18	2.04291	5.57853	4.88863	7.74735	8.49804
Gpank1	0.0773691	0.0208333	24	6	2.04262	18.2908	24.3905	16.8308	16.365
Rap1b	0.0773691	0.0208333	24	21	2.03318	33.8856	30.924	31.7495	34.5386
Rom1	0.0773691	0.0208333	24	9	2.03254	3.72745	6.58183	5.26907	2.37455
Cd3d	0.0773691	0.0208333	24	9	2.0314	5.19574	13.3018	6.84944	4.93422
Cog8	0.0773691	0.0208333	24	9	2.03042	10.1965	14.0597	11.9163	10.002
Mfn1	0.0773691	0.0208333	24	12	2.02985	9.08474	10.9985	14.6857	10.1279
Bag3	0.0773691	0.0208333	24	18	2.02897	15.6252	14.7845	17.8456	18.3029
Gng10	0.0773691	0.0208333	24	6	2.02794	8.63907	10.6216	7.38993	6.13485
Cnot6	0.0773691	0.0208333	24	21	2.0273	6.20724	2.45065	4.2872	6.26469
Tmem116	0.0773691	0.0208333	24	18	2.02385	0.513537	0.430499	2.66156	4.0068
Nudt8	0.0773691	0.0208333	24	9	2.02208	15.8598	17.8269	16.5449	12.7927
E130306D19Rik	0.0773691	0.0208333	24	3	2.01973	9.01106	6.74337	4.72091	5.32085
Klhl2	0.0773691	0.0208333	24	18	2.01852	8.78037	6.78355	9.16277	12.1104
Cpd	0.0773691	0.0208333	24	18	2.01649	10.9459	9.96901	13.2101	13.4083
Clec2d	0.0773691	0.0208333	24	6	2.01631	166.796	201.77	165.027	164.895
Enc1	0.0773691	0.0208333	24	15	2.01259	2.70407	3.36263	6.73932	5.01984
Aarsd1	0.0773691	0.0208333	24	6	2.00598	8.68448	11.391	7.25065	6.79322
Mllt4	0.0773691	0.0208333	24	18	2.00435	11.5057	9.42885	13.0717	13.532
1110018G07Rik	0.0773691	0.0208333	24	21	2.00172	9.69841	6.76534	7.76066	10.4893
Tmem189	0.0773691	0.0208333	24	12	2.00102	3.98067	5.86725	10.7564	5.48668
Snrpa1	0.0773691	0.0208333	24	3	2.00075	11.7581	9.5979	7.43939	8.25764
Ifngr1	0.0773691	0.0208333	24	15	1.99828	95.5238	114.098	115.982	114.833
Usp25	0.0773691	0.0208333	24	18	1.99622	9.90485	6.36023	10.2202	11.7869
Hist3h2a	0.0773691	0.0208333	24	15	1.99316	4.30299	5.61494	9.8397	6.18216
Sfrs18	0.0773691	0.0208333	24	21	1.99167	12.1943	8.47472	10.8893	12.803
Zfand5	0.0773691	0.0208333	24	0	1.99103	8.29564	5.84099	4.80414	7.98098
Slc16a1	0.0773691	0.0208333	24	0	1.98978	12.8072	9.38117	8.74918	10.9511
H13	0.0773691	0.0208333	24	6	1.98757	24.2038	29.8887	23.0534	22.3299
Myo6	0.0773691	0.0208333	24	21	1.9845	22.0766	19.757	21.326	24.6194
Rap1gap2	0.0773691	0.0208333	24	15	1.98379	5.64473	5.78807	9.05145	7.99236
Pold4	0.0773691	0.0208333	24	9	1.98089	51.189	53.0566	52.6537	43.5039
Adap2	0.0773691	0.0208333	24	18	1.97706	7.92929	5.62675	8.83491	10.3131
2310030G06Rik	0.0773691	0.0208333	24	3	1.9758	22.0799	19.2686	17.4058	17.574
[truncated: 21,286 more rows]

## Sheet: GF
Names	BH.Q	ADJ.P	PER	LAG	AMP	ZT2	ZT8	ZT14	ZT20
Apoa1	0.0741409	0.0208333	24	18	5499.38	18341.3	12749.2	20550.4	26094.7
Crip1	0.0741409	0.0208333	24	21	1271.31	21860.9	17414.1	21193.5	22392.1
Guca2a	0.0741409	0.0208333	24	12	686.374	3166.01	3985.06	4882.34	3760.03
Mt1	0.0741409	0.0208333	24	6	642.994	1035.65	1671.82	634.456	254.352
Krt8	0.0741409	0.0208333	24	15	636.142	3275.69	3636.83	5208.14	3875.45
Actb	0.0741409	0.0208333	24	12	574.164	2326.29	2916.99	3706.54	2673.26
Krt20	0.0741409	0.0208333	24	15	430.356	1600.49	1806.72	2354.15	2270.29
Plac8	0.0741409	0.0208333	24	12	412.123	1633.52	2291.98	2535.99	2028.79
Clca6	0.0741409	0.0208333	24	15	395.687	355.78	487.408	1198.77	763.589
Slc25a5	0.0741409	0.0208333	24	15	363.17	1879.98	2213.85	2792.95	2328.08
Anxa2	0.0741409	0.0208333	24	15	321.953	1855.08	2040	2742.09	2158.62
Anpep	0.0741409	0.0208333	24	15	308.514	3777.96	3875.33	4467.17	4068.83
Sepp1	0.0741409	0.0208333	24	18	296.667	2460.5	1979.74	2545.69	2740.2
Actg1	0.0741409	0.0208333	24	15	286.136	962.798	992.181	1667.97	1232.57
Pmp22	0.0741409	0.0208333	24	12	273.905	1331.53	1589.77	2191.16	1540.89
Mt2	0.0741409	0.0208333	24	6	269.032	365.905	652.47	179.063	78.375
Ppp1r14d	0.0741409	0.0208333	24	0	256.762	724.221	331.712	313.72	647.445
Naaladl1	0.0741409	0.0208333	24	18	219.345	2429.76	2022.22	2620.35	2636.56
Guca2b	0.0741409	0.0208333	24	15	216.025	2823.61	3458.18	3661.85	3573.1
Atp1b1	0.0741409	0.0208333	24	12	213.638	402.293	711.209	719.959	424.616
Spink3	0.0741409	0.0208333	24	3	212.747	3375.45	3020.8	2820.22	2910.42
Defa20	0.0741409	0.0208333	24	12	208.892	46.4194	402.806	403.757	169.309
Snord104	0.0741409	0.0208333	24	6	208.881	337.817	690.006	336.206	100.812
Muc13	0.0741409	0.0208333	24	21	191.325	974.325	655.952	902.475	1125.25
Slc34a2	0.0741409	0.0208333	24	21	168.073	355.419	107.152	174.865	401.979
Slc9a3r1	0.0741409	0.0208333	24	12	167.471	1256.93	1474.56	1695.94	1439.89
Fdps	0.0741409	0.0208333	24	18	160.161	225.997	180.137	397.65	461.487
Gm15284	0.0741409	0.0208333	24	12	159.402	45.5833	303.077	318.69	125.326
Spink4	0.0741409	0.0208333	24	12	149.629	584.535	725.607	926.651	601.603
Dbi	0.0741409	0.0208333	24	0	146.315	1485.21	1279.73	1142.53	1350.89
Gm20594	0.0741409	0.0208333	24	18	139.175	813.898	609.366	862.976	953.934
Usmg5	0.0741409	0.0208333	24	9	137.546	1127.52	1330.36	1238.77	1052.57
Ppia	0.0741409	0.0208333	24	12	131.058	587.975	737.638	838.775	617.751
2210415F13Rik	0.0741409	0.0208333	24	12	129.97	1305.86	1459.89	1525.06	1311.48
Defa22	0.0741409	0.0208333	24	12	127.168	32.904	243.56	245.458	96.4281
Maoa	0.0741409	0.0208333	24	9	115.216	326.482	481.948	423.322	252.907
Abcb1a	0.0741409	0.0208333	24	12	107.883	96.7363	209.608	295.261	102.994
Tubb4b	0.0741409	0.0208333	24	18	107.644	400.08	397.53	544.931	557.141
Serpinb6a	0.0741409	0.0208333	24	12	105.992	699.637	799.567	1081.59	739.84
Gm15308	0.0741409	0.0208333	24	12	105.342	33.0687	198.996	216.53	84.5065
Cd82	0.0741409	0.0208333	24	21	105.225	548.721	382.681	420.175	551.755
Hspa8	0.0741409	0.0208333	24	12	102.984	395.192	492.286	838.391	426.35
Ezr	0.0741409	0.0208333	24	12	102.622	622.251	724.603	893.589	705.682
Snord49a	0.0741409	0.0208333	24	12	101.671	0	121.615	237.028	71.073
9130017N09Rik	0.0741409	0.0208333	24	21	101.398	454.192	302.964	393.952	529.522
Myo1a	0.0741409	0.0208333	24	12	100.911	688.253	808.452	923.819	758.598
Rps19	0.0741409	0.0208333	24	9	99.4415	340.118	466.546	458.073	303.238
Lgals9	0.0741409	0.0208333	24	0	98.2634	376.359	279.86	186.424	367.856
Snord52	0.0741409	0.0208333	24	12	94.5675	0	155.97	202.658	91.1508
Atp5g3	0.0741409	0.0208333	24	9	92.4535	849.764	973.838	872.142	734.718
Rps3a	0.0741409	0.0208333	24	9	90.719	457.901	563.507	559.088	408.102
Enpep	0.0741409	0.0208333	24	12	90.2639	524.615	656.616	724.668	601.364
Clca3	0.0741409	0.0208333	24	18	89.8319	891.113	743.454	893.685	994.965
Slc6a8	0.0741409	0.0208333	24	15	86.8769	231.259	240.036	393.763	323.257
Atp5o	0.0741409	0.0208333	24	9	85.3237	703.736	807.123	787.053	649.108
Prdx1	0.0741409	0.0208333	24	9	85.1597	756.126	907.3	812.984	723.29
Elovl1	0.0741409	0.0208333	24	12	85.1533	157.128	245.361	326.754	174.137
Scin	0.0741409	0.0208333	24	9	85.0511	148.716	287.38	186.958	85.0613
Cox8a	0.0741409	0.0208333	24	9	84.1811	1117.94	1246.41	1224.06	1114.43
Eps8l3	0.0741409	0.0208333	24	12	83.4259	120.809	231.766	292.861	167.854
Gnb2l1	0.0741409	0.0208333	24	9	81.5969	312.92	413.958	413.064	283.311
Slc13a2	0.0741409	0.0208333	24	12	81.1274	299.844	392.164	480.198	343.055
Slc13a1	0.0741409	0.0208333	24	12	81.097	346.499	422.958	607.381	395.635
Ndufa4	0.0741409	0.0208333	24	9	79.2568	560.584	711.811	617.383	542.659
Prr15	0.0741409	0.0208333	24	9	79.0086	280.983	429.612	296.438	221.597
Abp1	0.0741409	0.0208333	24	0	78.6342	968.146	749.775	686.099	760.236
Reg3a	0.0741409	0.0208333	24	6	75.5183	313.375	340.239	240.304	199.712
Mall	0.0741409	0.0208333	24	21	73.2089	309.408	174.368	245.652	317.678
Atp5b	0.0741409	0.0208333	24	9	73.0487	724.245	818.929	817.483	705.554
Prr13	0.0741409	0.0208333	24	21	72.9275	545.531	416.951	469.245	546.935
Ada	0.0741409	0.0208333	24	21	72.2394	251.521	152.564	196.12	301.487
Mir3960	0.0741409	0.0208333	24	21	71.8624	101.345	28.7502	37.3563	168.019
Mir22	0.0741409	0.0208333	24	0	71.8257	171.462	64.615	0	96.3068
Mir194-1	0.0741409	0.0208333	24	21	68.0881	147.232	42.1227	109.463	196.936
Hmgcs1	0.0741409	0.0208333	24	18	66.4758	143.259	121.578	224.13	228.729
Slc6a19	0.0741409	0.0208333	24	12	66.4157	362.549	427.859	518.727	396.185
Ggt1	0.0741409	0.0208333	24	15	65.2504	591.668	638.137	759.154	655.207
Mir29c	0.0741409	0.0208333	24	18	64.3265	7.76411	5.17441	65.822	151.339
Cdkn1a	0.0741409	0.0208333	24	12	62.7405	241.815	312.753	383.643	277.124
Ephx2	0.0741409	0.0208333	24	18	61.0611	127.388	103.135	171.765	231.465
1810011O10Rik	0.0741409	0.0208333	24	18	60.7132	139.173	61.4204	187.385	196.414
Lgals6	0.0741409	0.0208333	24	12	60.0263	617.059	683.217	729.924	626.302
Pmvk	0.0741409	0.0208333	24	18	59.6375	70.5916	41.3242	132.472	148.124
Hspa5	0.0741409	0.0208333	24	9	59.2467	216.46	305.805	272.016	193.786
2023-09-05	0.0741409	0.0208333	24	15	57.8912	292.131	292.702	395.559	353.015
Mir703	0.0741409	0.0208333	24	9	57.76	320.206	405.839	369.125	291.388
Agr2	0.0741409	0.0208333	24	12	57.5907	466.567	530.876	612.928	514.346
Eif1	0.0741409	0.0208333	24	12	57.4613	415.116	469.291	598.138	428.053
Fdft1	0.0741409	0.0208333	24	18	57.3913	96.6834	80.4065	169.336	170.081
Ace2	0.0741409	0.0208333	24	15	56.4328	634.231	699.215	764.833	728.229
Agpat2	0.0741409	0.0208333	24	18	54.064	287.712	247.916	329.816	358.728
2010003K11Rik	0.0741409	0.0208333	24	12	53.9038	136.553	238.065	238.178	187.227
Pkm2	0.0741409	0.0208333	24	15	53.6839	252.07	293.405	387.664	309.652
Bcl2l15	0.0741409	0.0208333	24	9	53.3905	270.384	333.573	332.651	244.829
Mir196a-1	0.0741409	0.0208333	24	21	52.3552	160.884	29.8452	116.337	165.698
Mir686	0.0741409	0.0208333	24	0	52.3008	232.694	142.462	123.433	181.13
Calm1	0.0741409	0.0208333	24	15	51.8168	762.888	804.456	883.811	830.093
Cml5	0.0741409	0.0208333	24	15	51.7712	61.232	90.595	170.925	127.333
Slc27a4	0.0741409	0.0208333	24	18	51.7326	429.085	367.596	461.696	481.307
Plscr1	0.0741409	0.0208333	24	9	51.6024	117.15	206.447	153.437	96.7805
Elf3	0.0741409	0.0208333	24	18	51.4022	131.254	74.3377	171.121	179.858
Pnp2	0.0741409	0.0208333	24	0	50.7156	144.656	66.9541	55.3896	121.133
Insig1	0.0741409	0.0208333	24	15	50.6036	47.2008	58.3927	127.521	121.201
Rpl3	0.0741409	0.0208333	24	9	50.5864	168.561	241.137	216.181	145.677
Akr1a1	0.0741409	0.0208333	24	6	49.5392	744.423	789.643	742.937	631.901
Atp5l	0.0741409	0.0208333	24	9	47.3107	769.916	814.521	800.518	692.125
Cyc1	0.0741409	0.0208333	24	9	46.9158	253.27	322.624	286.316	222.972
Slc3a1	0.0741409	0.0208333	24	15	46.8476	164.73	186.959	262.424	221.77
Atp5a1	0.0741409	0.0208333	24	9	45.794	323.512	391.535	365.116	303.614
Akr1c13	0.0741409	0.0208333	24	12	44.96	108.216	169.671	174.697	108.986
Tm4sf20	0.0741409	0.0208333	24	9	44.721	108.282	189.668	149.719	104.615
Ceacam1	0.0741409	0.0208333	24	18	44.6389	208.419	144.109	209.136	269.65
Gpd1	0.0741409	0.0208333	24	9	44.634	206.156	278.685	211.161	157.446
Calr	0.0741409	0.0208333	24	12	43.8629	389.879	449.535	477.395	412.988
Atp5j	0.0741409	0.0208333	24	9	43.3746	286.105	346.737	346.024	283.974
Atp5c1	0.0741409	0.0208333	24	9	42.8811	382.353	439.766	424.046	360.173
Vdac2	0.0741409	0.0208333	24	15	42.8666	339.655	358.164	445.235	380.07
Sqle	0.0741409	0.0208333	24	18	42.7568	79.9093	68.6073	134.35	135.101
Rnase4	0.0741409	0.0208333	24	3	42.6074	202.117	126.614	85.6902	122.529
Atp6v0c	0.0741409	0.0208333	24	12	42.3416	26.8529	85.3037	123.993	62.6837
Chchd7	0.0741409	0.0208333	24	9	42.1361	246.64	296.653	292.721	223.555
Scarna2	0.0741409	0.0208333	24	18	41.8367	151.661	131.773	171.217	385.046
Ccbl1	0.0741409	0.0208333	24	18	41.2972	30.2691	26.4824	84.2776	89.28
Apol7a	0.0741409	0.0208333	24	21	41.2521	76.2769	36.2401	39.4843	116.126
Glod5	0.0741409	0.0208333	24	9	41.0345	280.239	341.825	308.746	254.269
Scd2	0.0741409	0.0208333	24	15	40.7547	47.3843	52.1211	109.817	104.96
Akr1b7	0.0741409	0.0208333	24	21	40.4345	167.341	113.529	125.736	186.29
Snord35b	0.0741409	0.0208333	24	18	40.0842	17.2851	0	37.7917	101.987
Herpud1	0.0741409	0.0208333	24	12	39.797	32.5024	70.6617	128.512	54.1085
Rpl36al	0.0741409	0.0208333	24	9	39.7677	295.634	338.62	327.009	257.515
Mir1896	0.0741409	0.0208333	24	3	39.3448	109.825	37.0946	0	21.6785
Cbr1	0.0741409	0.0208333	24	3	39.2568	259.299	222.557	161.305	209.516
Tpi1	0.0741409	0.0208333	24	18	39.1727	509.494	481.712	527.715	574.288
Idi1	0.0741409	0.0208333	24	18	39.1176	50.4638	42.2127	93.6338	109.684
0610010O12Rik	0.0741409	0.0208333	24	21	38.7473	429.796	378.25	410.43	468.478
Eif5a	0.0741409	0.0208333	24	9	38.7431	264.229	307.79	293.769	227.748
Prss30	0.0741409	0.0208333	24	18	38.3906	282.661	190.118	285.569	318.856
Nme2	0.0741409	0.0208333	24	9	37.4194	195.962	231.766	230.954	160.92
Alpi	0.0741409	0.0208333	24	21	36.5677	407.463	352.849	385.42	434.235
Defa17	0.0741409	0.0208333	24	12	36.5098	14.5938	74.0187	79.8704	36.03
Atp5g2	0.0741409	0.0208333	24	9	36.3891	206.29	246.331	240.799	177.916
Vnn1	0.0741409	0.0208333	24	3	36.2958	121.991	108.669	40.0195	87.771
Aprt	0.0741409	0.0208333	24	6	36.0921	206.658	257.974	203.1	159.448
Neurl3	0.0741409	0.0208333	24	9	36.0366	110.429	163.088	142.027	92.7592
Slc25a22	0.0741409	0.0208333	24	18	35.776	82.581	66.3751	121.103	129.043
Cyp51	0.0741409	0.0208333	24	18	35.4544	76.0594	54.2263	104.013	126.553
Ndufb8	0.0741409	0.0208333	24	9	34.9074	265.702	298.613	288.147	218.564
Gpt	0.0741409	0.0208333	24	18	34.464	154.201	151.27	184.976	217.974
Actn4	0.0741409	0.0208333	24	18	34.4117	308.969	272.85	333.007	346.143
Slc16a5	0.0741409	0.0208333	24	12	33.8482	60.7413	110.109	111.218	64.8486
Hist1h1c	0.0741409	0.0208333	24	18	33.6673	108.023	63.8505	124.627	142.472
Ugt2b34	0.0741409	0.0208333	24	9	33.6028	161.899	217.905	199.715	160.678
4931406C07Rik	0.0741409	0.0208333	24	18	33.1922	98.2242	94.0761	137.855	148.327
Mvd	0.0741409	0.0208333	24	18	33.1503	41.7063	33.1006	78.0776	90.4925
Fcgbp	0.0741409	0.0208333	24	21	33.0986	483.727	422.687	483.334	515.911
Eif4a1	0.0741409	0.0208333	24	9	33.0286	153.151	201.261	195.369	150.06
Sord	0.0741409	0.0208333	24	3	32.6613	394.684	375.832	318.465	359.671
Fam102a	0.0741409	0.0208333	24	15	32.4299	38.3153	48.7082	133.365	68.8905
Cyb5	0.0741409	0.0208333	24	6	32.417	585.682	607.179	576.616	492.86
Tstd1	0.0741409	0.0208333	24	12	31.8933	103.756	144.576	154.2	104.812
Hadh	0.0741409	0.0208333	24	3	31.8389	348.441	346.187	263.845	318.423
Tpm1	0.0741409	0.0208333	24	21	31.8308	263.273	220.415	225.327	272.5
4933431E20Rik	0.0741409	0.0208333	24	12	31.6541	53.6533	90.4368	115.637	62.8891
Scp2	0.0741409	0.0208333	24	0	31.4797	349.953	314.48	289.972	343.537
1810006K21Rik	0.0741409	0.0208333	24	9	31.2407	189.632	226.798	211.04	159.844
Tsc22d1	0.0741409	0.0208333	24	18	31.0052	240.035	167.215	265.217	269.267
Lass2	0.0741409	0.0208333	24	12	30.8625	99.7687	146.277	146.866	106.082
Mir3074-1	0.0741409	0.0208333	24	15	30.6375	18.1057	45.7298	79.2247	71.2666
P4hb	0.0741409	0.0208333	24	9	30.302	536.916	781.322	548.784	520.215
Ifrd1	0.0741409	0.0208333	24	12	30.2684	26.3335	66.8176	76.999	31.871
Atpif1	0.0741409	0.0208333	24	9	30.1758	916.039	944.489	926.632	846.858
Rnf167	0.0741409	0.0208333	24	0	30.0343	145.416	99.6771	86.8711	126.082
Cryl1	0.0741409	0.0208333	24	6	29.935	212.859	219.557	177.473	170.274
Tspan3	0.0741409	0.0208333	24	3	29.8936	404.095	364.856	329.94	354.459
Slc7a7	0.0741409	0.0208333	24	12	29.7024	177.685	219.204	221.762	179.27
Oit1	0.0741409	0.0208333	24	3	29.6025	170.954	138.887	91.7465	134.366
Ctnnb1	0.0741409	0.0208333	24	21	29.3043	256.956	221.674	234.289	281.892
Slc39a4	0.0741409	0.0208333	24	21	29.1385	185.632	137.176	164.758	198.718
Zfp36	0.0741409	0.0208333	24	15	28.9033	97.3751	123.639	161.232	141.533
Creb3l3	0.0741409	0.0208333	24	12	28.623	106.971	177.225	199.932	172.946
Cdkn2b	0.0741409	0.0208333	24	0	28.0435	183.91	144.67	132.589	172.668
Pnp	0.0741409	0.0208333	24	0	28.0389	110.92	67.9549	62.7063	99.0471
B4galnt1	0.0741409	0.0208333	24	9	27.1614	120.291	162.467	148.881	114.233
Cdc42se2	0.0741409	0.0208333	24	15	27.0071	94.9423	102.905	152.696	121.539
Tuba4a	0.0741409	0.0208333	24	15	26.9454	88.242	109.295	154.46	119.29
Aldh1b1	0.0741409	0.0208333	24	9	26.7714	223.619	272.849	237.452	210.961
Hsp90b1	0.0741409	0.0208333	24	9	26.6699	150.09	187.63	177.434	139.54
2010106E10Rik	0.0741409	0.0208333	24	21	26.5854	472.044	446.979	463.512	532.584
Aspa	0.0741409	0.0208333	24	6	26.5593	158.009	186.278	147.677	121.489
Gpx1	0.0741409	0.0208333	24	9	26.4819	80.5442	125.953	107.052	77.5586
Rorc	0.0741409	0.0208333	24	18	26.2549	34.373	18.7868	53.6729	73.7471
Tspan8	0.0741409	0.0208333	24	6	26.0742	550.025	561.252	536.669	456.89
Car4	0.0741409	0.0208333	24	12	26.0183	84.7612	120.47	145.508	107.626
Prr15l	0.0741409	0.0208333	24	21	25.8398	342.323	196.279	320.401	344.763
Anxa7	0.0741409	0.0208333	24	9	25.6442	46.6414	80.422	77.2401	38.4879
Cubn	0.0741409	0.0208333	24	12	25.3155	118.508	142.644	169.811	122.344
Slc25a20	0.0741409	0.0208333	24	21	25.268	84.8094	43.0874	73.7113	103.458
Romo1	0.0741409	0.0208333	24	9	25.1949	126.792	161.537	160.682	124.165
Plbd1	0.0741409	0.0208333	24	6	25.0892	108.258	132.839	86.9898	83.1441
Sdhd	0.0741409	0.0208333	24	6	25.0097	178.881	204.459	166.28	146.322
Nme7	0.0741409	0.0208333	24	9	24.9952	46.4632	82.8304	75.4671	41.1371
Hn1	0.0741409	0.0208333	24	0	24.9764	174.668	151.12	121.592	172.853
0610005C13Rik	0.0741409	0.0208333	24	9	24.8805	40.9957	86.7855	56.7321	32.1493
Amdhd2	0.0741409	0.0208333	24	9	24.5625	68.2933	94.8721	89.6871	46.7926
D4Bwg0951e	0.0741409	0.0208333	24	9	24.0382	68.6684	104.292	89.391	57.0244
Uqcrc1	0.0741409	0.0208333	24	9	23.8578	167.87	196.815	188.241	149.706
Rbm3	0.0741409	0.0208333	24	9	23.8047	57.3886	81.6277	71.0672	27.9764
Susd2	0.0741409	0.0208333	24	21	23.7252	148.296	109.903	143.473	172.185
Oasl1	0.0741409	0.0208333	24	15	23.3894	53.8293	58.4464	99.1012	79.3298
Slc6a20a	0.0741409	0.0208333	24	6	23.3196	105.427	114.681	79.2607	74.8896
Lgals3bp	0.0741409	0.0208333	24	6	23.2355	168.471	180.792	147.606	135.937
Cs	0.0741409	0.0208333	24	15	23.2232	329.605	351.523	376.908	369.905
Pls1	0.0741409	0.0208333	24	0	23.0658	446.675	415.115	408.002	441.682
Atf3	0.0741409	0.0208333	24	12	23.0462	26.8714	48.5996	87.0168	34.245
Clrn3	0.0741409	0.0208333	24	12	23.0333	108.087	129.803	177.39	127.097
Bok	0.0741409	0.0208333	24	0	22.7683	55.2504	14.73	14.2692	38.1472
Wsb2	0.0741409	0.0208333	24	9	22.755	79.1956	109.82	108.238	74.5016
Eps8l2	0.0741409	0.0208333	24	21	22.7268	176.477	130.983	166.485	187.912
Ctsz	0.0741409	0.0208333	24	9	22.62	110.497	151.297	118.059	94.8801
Sdhb	0.0741409	0.0208333	24	9	22.4591	244.803	274.403	254.838	220.914
Sec61b	0.0741409	0.0208333	24	9	22.2813	253.7	274.707	271.704	201.605
Cat	0.0741409	0.0208333	24	0	22.2321	148.177	121.383	103.767	139.855
Gjb3	0.0741409	0.0208333	24	12	22.1613	15.3922	40.5491	57.2064	19.6818
Slc25a3	0.0741409	0.0208333	24	6	21.5487	538.446	542.749	522.146	498.1
Vmp1	0.0741409	0.0208333	24	0	21.3471	109.67	82.7543	63.6412	97.1043
Uqcrc2	0.0741409	0.0208333	24	9	21.2372	130.999	165.973	152.465	127.371
Mpp1	0.0741409	0.0208333	24	9	21.1984	334.172	354.158	347.231	289.061
Lss	0.0741409	0.0208333	24	18	21.149	16.5559	13.0613	42.9333	46.5023
Slc46a3	0.0741409	0.0208333	24	21	21.0774	73.8134	42.8176	63.1095	91.7295
2010110P09Rik	0.0741409	0.0208333	24	0	20.9152	168.355	148.636	122.095	165.078
Cyp3a11	0.0741409	0.0208333	24	3	20.5369	49.8239	46.4749	11.3449	26.8669
Gprc5a	0.0741409	0.0208333	24	15	20.3139	20.4931	34.7513	90.0039	39.6452
Ier5	0.0741409	0.0208333	24	21	20.2371	46.5339	16.7787	31.4004	58.8843
Hmgcr	0.0741409	0.0208333	24	15	20.2089	39.7352	52.2248	76.6531	72.4663
Plek2	0.0741409	0.0208333	24	12	20.0735	25.1619	44.0874	97.3196	39.8435
Fam3b	0.0741409	0.0208333	24	18	19.922	149.731	129.075	157.834	177.32
Tmprss4	0.0741409	0.0208333	24	21	19.8063	108.079	71.4193	100.437	119.798
Pmm2	0.0741409	0.0208333	24	9	19.7858	92.426	122.593	104.771	78.9753
Psmb3	0.0741409	0.0208333	24	6	19.677	174.033	200.507	172.223	146.662
Atp5f1	0.0741409	0.0208333	24	9	19.6636	206.079	232.332	225.608	196.244
Fos	0.0741409	0.0208333	24	15	19.5362	57.3294	63.0228	107.773	75.7483
Jun	0.0741409	0.0208333	24	18	19.5251	32.1919	23.8663	55.5149	55.7686
Nsdhl	0.0741409	0.0208333	24	18	19.5026	37.5736	35.3782	62.8762	65.2374
Cox17	0.0741409	0.0208333	24	6	19.479	271.249	286.914	261.687	241.381
Cope	0.0741409	0.0208333	24	9	19.3984	118.395	148.467	133.126	108.331
Nr1d1	0.0741409	0.0208333	24	6	19.3752	19.8944	73.3923	17.9686	1.62733
Mxd1	0.0741409	0.0208333	24	12	19.3691	131.47	156.621	182.21	152.577
Ddc	0.0741409	0.0208333	24	3	19.3681	43.7872	38.6151	7.22861	20.3923
Eef1g	0.0741409	0.0208333	24	9	18.9964	112.395	135.83	131.223	100.928
Relb	0.0741409	0.0208333	24	21	18.9748	103.782	73.8623	91.2229	114.972
Acaa1a	0.0741409	0.0208333	24	6	18.9357	121.065	136.033	114.308	89.2318
Tppp3	0.0741409	0.0208333	24	21	18.7716	41.1046	17.267	36.9829	66.2393
Dbp	0.0741409	0.0208333	24	9	18.7561	1.64148	41.161	18.2993	0.615916
Grb7	0.0741409	0.0208333	24	21	18.7554	74.1371	47.1746	48.3045	74.3902
Suclg1	0.0741409	0.0208333	24	9	18.4806	135.469	163.142	143.223	118.625
Tjp3	0.0741409	0.0208333	24	0	18.4663	77.4683	50.2513	43.3053	68.3188
Psmb1	0.0741409	0.0208333	24	9	18.4173	164.155	184.677	173.177	141.607
Aplp1	0.0741409	0.0208333	24	18	18.2769	121.105	117.578	141.744	148.634
Hkdc1	0.0741409	0.0208333	24	9	17.8261	80.6052	104.194	98.9461	72.1151
Ccrn4l	0.0741409	0.0208333	24	15	17.7409	25.4939	40.323	97.2993	42.2202
Tprn	0.0741409	0.0208333	24	21	17.6627	76.511	50.0977	56.6959	80.2402
Ldlr	0.0741409	0.0208333	24	15	17.6087	37.1006	58.8075	79.2826	66.4304
Ndufb2	0.0741409	0.0208333	24	9	17.5974	141.267	165.069	154.566	128.595
Chmp2b	0.0741409	0.0208333	24	0	17.4071	117.161	86.106	82.1102	100.29
Tns4	0.0741409	0.0208333	24	9	17.407	23.8356	51.2042	32.7624	10.8966
Psma7	0.0741409	0.0208333	24	9	17.3747	127.815	153.218	134.549	110.809
Apoe	0.0741409	0.0208333	24	21	17.363	215.612	199.242	205.114	266.301
Klf4	0.0741409	0.0208333	24	15	17.2997	128.112	141.421	164.572	153.892
Fbp2	0.0741409	0.0208333	24	6	17.2145	323.939	328.892	312.662	265.172
Cndp2	0.0741409	0.0208333	24	12	17.0872	1114.06	1184.89	1190.42	1174.31
Ndufb5	0.0741409	0.0208333	24	9	17.0872	107.434	123.544	121.918	88.8834
Casp1	0.0741409	0.0208333	24	6	17.0854	103.724	115.665	88.2208	82.8433
Nuak2	0.0741409	0.0208333	24	21	16.933	56.2182	30.5135	43.7775	65.9666
Ccng2	0.0741409	0.0208333	24	15	16.785	79.0925	99.1774	119.381	106.364
Brp44l	0.0741409	0.0208333	24	15	16.6587	125.227	125.707	153.892	144.16
Slc31a1	0.0741409	0.0208333	24	0	16.6164	102.901	74.9621	70.0851	89.1445
Sh3bgrl3	0.0741409	0.0208333	24	12	16.5891	140.344	163.134	168.499	144.368
Itgb5	0.0741409	0.0208333	24	21	16.5474	63.0148	35.8838	61.9522	81.6242
Tmc5	0.0741409	0.0208333	24	21	16.5444	95.7223	52.682	81.1645	96.7627
Ang	0.0741409	0.0208333	24	3	16.4164	112.068	70.5772	55.0997	60.4386
Stk25	0.0741409	0.0208333	24	21	16.3745	136.093	96.1778	121.1	136.538
Slc39a5	0.0741409	0.0208333	24	9	16.343	134.431	156.488	140.099	115.931
Abcg5	0.0741409	0.0208333	24	6	16.2899	103.162	121.184	98.9573	79.314
4930539E08Rik	0.0741409	0.0208333	24	21	16.1912	48.0217	17.7183	32.5439	48.0361
1110007C09Rik	0.0741409	0.0208333	24	12	16.1787	81.2511	96.5045	125.638	89.2864
Tmem37	0.0741409	0.0208333	24	21	16.0732	43.3835	18.7425	30.5848	51.4058
Ssr4	0.0741409	0.0208333	24	9	16.0319	163.278	181.73	169.055	142.162
Pcsk9	0.0741409	0.0208333	24	15	15.918	24.0958	29.6939	57.3077	41.5049
Snrpg	0.0741409	0.0208333	24	9	15.9135	78.4944	104.156	94.2292	74.8806
Psmb4	0.0741409	0.0208333	24	9	15.8841	162.087	180.898	171.904	145.788
Cyp4f16	0.0741409	0.0208333	24	18	15.7954	211.626	186.927	217.395	226.518
Pacsin2	0.0741409	0.0208333	24	9	15.7509	48.1924	73.0616	66.3827	46.7015
F11r	0.0741409	0.0208333	24	18	15.7017	122.577	120.465	140.321	147.132
Capns1	0.0741409	0.0208333	24	12	15.6999	185.79	200.592	245.863	187.706
Pla2g12b	0.0741409	0.0208333	24	0	15.62	170.499	155.07	139.253	168.004
Park7	0.0741409	0.0208333	24	9	15.5741	54.6241	76.1795	65.1795	42.6848
Prdx2	0.0741409	0.0208333	24	9	15.4962	159.816	185.123	172.165	153.642
Cidec	0.0741409	0.0208333	24	15	15.4225	30.0121	32.3506	67.8335	44.5526
Rrbp1	0.0741409	0.0208333	24	0	15.345	110.617	91.9634	81.3533	106.102
Hexb	0.0741409	0.0208333	24	3	15.2806	148.198	138.256	119.954	123.28
Arrb1	0.0741409	0.0208333	24	21	15.2804	37.4756	13.4741	18.6186	37.8366
Snrpd2	0.0741409	0.0208333	24	12	15.1569	56.0519	75.8513	79.7427	56.6719
Ndufs3	0.0741409	0.0208333	24	9	15.1421	88.6001	106.737	100.699	76.0076
Oaz1	0.0741409	0.0208333	24	6	15.0041	101.268	103.683	88.0237	74.4893
Gsdmd	0.0741409	0.0208333	24	3	14.8641	251.192	245.176	178.411	237.178
Nat8	0.0741409	0.0208333	24	12	14.769	100.416	115.29	133.79	106.891
Slc2a5	0.0741409	0.0208333	24	9	14.644	19.4443	58.9338	26.7144	12.9079
Cdc42ep2	0.0741409	0.0208333	24	18	14.6281	74.9905	47.5091	76.3598	88.782
Ostc	0.0741409	0.0208333	24	6	14.611	98.863	109.899	85.4026	82.0333
Myo7b	0.0741409	0.0208333	24	12	14.5585	94.8111	108.537	127.622	98.2354
Gale	0.0741409	0.0208333	24	18	14.4473	115.462	107.218	126.332	137.211
Slc6a6	0.0741409	0.0208333	24	12	14.4295	27.6903	45.4548	54.1095	31.0613
Ddx5	0.0741409	0.0208333	24	15	14.3592	135.855	150.044	165.076	161.437
Smagp	0.0741409	0.0208333	24	6	14.3557	127.669	136.948	122.406	101.607
Ndufb4	0.0741409	0.0208333	24	6	14.2486	279.991	298.728	278.62	259.798
Epha1	0.0741409	0.0208333	24	9	14.2	26.9104	52.5287	37.581	23.0355
Igsf9	0.0741409	0.0208333	24	0	14.1666	94.5651	80.2979	64.4952	90.2972
Ndrg1	0.0741409	0.0208333	24	3	14.0122	59.7997	58.9562	38.2974	40.8259
Eif3i	0.0741409	0.0208333	24	9	13.965	50.2022	68.4077	63.2522	41.9587
Fam96b	0.0741409	0.0208333	24	15	13.9156	80.8042	85.3452	110.583	94.9257
Gclm	0.0741409	0.0208333	24	18	13.9079	60.7824	58.4253	73.5036	85.0417
Aco2	0.0741409	0.0208333	24	15	13.8692	184.189	193.935	229.801	197.265
Errfi1	0.0741409	0.0208333	24	12	13.8502	19.901	41.4441	42.1312	24.4999
Por	0.0741409	0.0208333	24	12	13.8456	35.9849	53.2625	71.5339	49.6501
Myh14	0.0741409	0.0208333	24	18	13.8268	145.936	102.973	154.136	158.972
Rhou	0.0741409	0.0208333	24	12	13.5581	37.0891	50.3332	64.0839	38.9798
Ndufs8	0.0741409	0.0208333	24	9	13.4345	86.3153	102.736	98.1722	76.5944
Rpl22l1	0.0741409	0.0208333	24	9	13.4189	70.6453	90.3582	77.1036	58.862
Tm7sf2	0.0741409	0.0208333	24	21	13.3926	87.459	74.3551	82.3088	107.085
2610528J11Rik	0.0741409	0.0208333	24	12	13.3544	134.471	156.686	157.974	142.417
Apob	0.0741409	0.0208333	24	18	13.3304	194.155	192.856	205.424	225.131
Psmb2	0.0741409	0.0208333	24	9	13.3175	109.792	125.934	117.064	95.5384
Vasp	0.0741409	0.0208333	24	9	13.2896	104.723	126.541	107.668	91.8974
App	0.0741409	0.0208333	24	18	13.2752	171.573	149.742	181.283	184.089
Snora64	0.0741409	0.0208333	24	12	13.1827	5.34655	17.7753	40.4183	10.3881
Cops6	0.0741409	0.0208333	24	3	13.1792	72.0553	70.92	52.5421	53.1568
Erbb3	0.0741409	0.0208333	24	21	13.1391	45.9424	29.1752	34.8747	55.2704
Cmbl	0.0741409	0.0208333	24	3	13.1098	209.719	206.125	163.887	197.359
Dhrs3	0.0741409	0.0208333	24	0	13.0079	50.899	33.1596	29.9952	49.0478
Fam109a	0.0741409	0.0208333	24	21	13.0003	83.9509	69.1687	71.5591	93.5474
Sema4a	0.0741409	0.0208333	24	0	12.9645	119.603	99.3601	94.5488	110.975
Slc10a2	0.0741409	0.0208333	24	15	12.9369	181.364	192.591	281.557	193.561
Ndufv2	0.0741409	0.0208333	24	9	12.9123	93.9372	109.87	106.928	86.3394
Ctnna1	0.0741409	0.0208333	24	15	12.8959	151.224	165.7	180.924	172.475
Ppib	0.0741409	0.0208333	24	9	12.8517	105.1	122.983	114.773	96.306
Serinc3	0.0741409	0.0208333	24	18	12.8354	117.688	112.465	132.657	133.8
Ndufb3	0.0741409	0.0208333	24	9	12.8184	152.708	173.861	159.726	144.623
Psmb6	0.0741409	0.0208333	24	9	12.8075	119.629	140.243	121.265	105.654
1700011H14Rik	0.0741409	0.0208333	24	9	12.7798	46.0357	64.1564	53.6238	35.5977
Gsta4	0.0741409	0.0208333	24	12	12.7743	33.2159	47.8171	56.3252	34.7953
Coq10b	0.0741409	0.0208333	24	12	12.6865	10.0829	26.3416	36.2869	16.6629
Fbxo6	0.0741409	0.0208333	24	18	12.6675	53.9926	44.3577	65.9775	68.2019
AW112010	0.0741409	0.0208333	24	12	12.6512	158.445	174.365	193.505	173.642
Ndufa5	0.0741409	0.0208333	24	9	12.6389	111.01	125.217	111.926	90.3848
Uqcrfs1	0.0741409	0.0208333	24	9	12.5741	193.938	205.793	204.623	179.039
Arf1	0.0741409	0.0208333	24	9	12.5731	371.509	383.363	382.703	348.647
Lad1	0.0741409	0.0208333	24	3	12.4905	90.9059	86.4957	70.2166	71.8564
Mvk	0.0741409	0.0208333	24	18	12.4832	28.0474	25.0509	43.5122	44.894
Ak2	0.0741409	0.0208333	24	6	12.4369	131.74	150.386	131.296	115.653
Uap1	0.0741409	0.0208333	24	3	12.4171	66.38	62.703	42.8976	51.0644
Gm10768	0.0741409	0.0208333	24	6	12.3976	25.1288	67.3142	20.5104	13.4402
Tmem117	0.0741409	0.0208333	24	6	12.3888	48.6489	49.703	32.8543	30.4567
Ubc	0.0741409	0.0208333	24	15	12.3515	78.7354	87.3265	102.898	98.0993
Slc25a1	0.0741409	0.0208333	24	15	12.235	93.3142	95.88	117.667	106.133
Trappc2l	0.0741409	0.0208333	24	9	12.2329	87.2102	100.982	89.3074	68.4792
1810020D17Rik	0.0741409	0.0208333	24	0	12.0586	184.252	147.577	139.051	150.42
Ndufs2	0.0741409	0.0208333	24	9	11.9646	103.212	122.85	109.482	95.279
Abcc2	0.0741409	0.0208333	24	9	11.94	21.4157	55.6181	26.8476	15.5905
Kdelr1	0.0741409	0.0208333	24	9	11.9289	109.132	130.847	113.877	101.852
Wsb1	0.0741409	0.0208333	24	6	11.8772	56.5049	59.4822	42.4498	39.9435
Ndufc2	0.0741409	0.0208333	24	9	11.8638	64.0552	81.9963	71.0616	55.4467
Hagh	0.0741409	0.0208333	24	12	11.8508	144.843	156.016	173.325	150.246
Naprt1	0.0741409	0.0208333	24	0	11.7952	126.701	115.47	99.5262	121.657
Il17rc	0.0741409	0.0208333	24	9	11.7896	139.492	153.957	142.699	123.818
B4galnt2	0.0741409	0.0208333	24	12	11.7864	166.384	178.615	193.129	172.023
Pttg1ip	0.0741409	0.0208333	24	0	11.7341	195.031	166.099	159.366	170.429
Slc17a4	0.0741409	0.0208333	24	0	11.7161	40.2984	24.5647	17.5472	34.9517
Ndufb6	0.0741409	0.0208333	24	9	11.7051	93.7711	108.859	96.848	78.829
Gm6793	0.0741409	0.0208333	24	6	11.6381	71.7634	84.2234	64.2296	58.8397
Got1	0.0741409	0.0208333	24	12	11.6123	42.6514	54.7803	66.0627	45.347
Pabpc1	0.0741409	0.0208333	24	9	11.5831	93.3453	105.387	102.498	81.7777
Papss2	0.0741409	0.0208333	24	18	11.5687	58.2352	49.851	66.2101	74.5972
Cyp27a1	0.0741409	0.0208333	24	15	11.5603	28.3228	35.2421	54.7423	41.5201
Ndufa10	0.0741409	0.0208333	24	9	11.5473	54.588	71.2203	66.3932	50.3647
Sec61g	0.0741409	0.0208333	24	6	11.4745	113.27	128.611	113.047	96.3791
Ccdc107	0.0741409	0.0208333	24	9	11.4414	45.1474	64.8142	48.434	35.7395
Acat2	0.0741409	0.0208333	24	18	11.4283	13.4697	11.3065	25.7125	31.3878
Idh3g	0.0741409	0.0208333	24	9	11.4	63.0358	79.0651	69.7182	53.5033
Acox1	0.0741409	0.0208333	24	21	11.3629	176.893	166.18	171.89	200.97
Entpd8	0.0741409	0.0208333	24	21	11.3007	68.8125	55.4361	63.6897	82.2765
H47	0.0741409	0.0208333	24	6	11.2524	59.572	71.3469	53.6181	45.4742
Smpd2	0.0741409	0.0208333	24	0	11.219	52.6106	34.879	32.6428	46.6432
Odc1	0.0741409	0.0208333	24	15	11.2038	54.8718	61.4016	77.774	70.1886
Kdelr2	0.0741409	0.0208333	24	9	11.1978	90.5035	111.493	93.6268	82.944
Ndufa9	0.0741409	0.0208333	24	9	11.1747	77.821	90.6098	88.195	69.3769
Mtch2	0.0741409	0.0208333	24	6	11.1094	122.696	166.088	121.187	112.222
Slc25a15	0.0741409	0.0208333	24	0	11.07	83.7744	73.3375	52.077	78.7672
Gyk	0.0741409	0.0208333	24	3	10.9518	66.5436	64.5773	49.076	51.0686
Clic1	0.0741409	0.0208333	24	15	10.8792	111.579	143.304	153.561	151.808
Ndfip2	0.0741409	0.0208333	24	15	10.808	66.8483	69.19	84.1995	82.4084
Cycs	0.0741409	0.0208333	24	15	10.7887	143.954	148.479	167.676	155.272
Gtf2b	0.0741409	0.0208333	24	3	10.7761	102.11	92.5876	74.1208	90.0974
Parp12	0.0741409	0.0208333	24	21	10.6993	62.3166	47.7909	57.0405	72.777
Esrra	0.0741409	0.0208333	24	9	10.6784	121.167	138.137	133.358	120.125
Plekhb2	0.0741409	0.0208333	24	3	10.5472	105.02	100.786	81.9266	94.0474
B4galt6	0.0741409	0.0208333	24	9	10.5432	14.6586	34.7718	23.8474	13.9072
Mlx	0.0741409	0.0208333	24	9	10.5362	116.791	132.15	126.311	111.869
Insig2	0.0741409	0.0208333	24	0	10.5282	36.3188	19.4525	17.6879	30.5999
Maff	0.0741409	0.0208333	24	12	10.5225	10.8728	26.1875	28.7666	14.3191
Ywhah	0.0741409	0.0208333	24	12	10.5164	150.869	160.784	212.763	154.825
3110062M04Rik	0.0741409	0.0208333	24	21	10.4995	28.3359	10.2653	17.4376	29.0641
Ddost	0.0741409	0.0208333	24	9	10.4606	73.12	87.5601	78.9672	63.8203
Dab1	0.0741409	0.0208333	24	0	10.3962	27.347	11.7848	3.76385	17.6066
Dnajc19	0.0741409	0.0208333	24	6	10.3791	61.1419	64.9556	53.5075	43.2334
Nr1d2	0.0741409	0.0208333	24	9	10.3591	5.47393	20.0731	17.0084	2.30773
Psma2	0.0741409	0.0208333	24	9	10.2955	124.088	135.36	127.526	109.678
Arntl	0.0741409	0.0208333	24	0	10.2887	19.3427	3.64798	3.56561	16.9717
Idh3b	0.0741409	0.0208333	24	9	10.2445	63.5882	77.6837	68.2454	53.3652
Rdh9	0.0741409	0.0208333	24	3	10.2145	68.7079	63.7049	48.7186	54.8033
Zfand6	0.0741409	0.0208333	24	0	10.2062	63.9147	50.2795	47.1142	62.3465
Ing4	0.0741409	0.0208333	24	0	10.1924	51.8897	34.4153	31.1121	42.4661
Mocs2	0.0741409	0.0208333	24	0	10.1739	133.889	113.679	108.737	118.329
Tmem20	0.0741409	0.0208333	24	9	10.1602	45.3591	63.7474	47.6003	37.2513
Tmem150b	0.0741409	0.0208333	24	9	10.065	66.0276	83.5042	75.0741	64.0827
Sec61a1	0.0741409	0.0208333	24	6	10.0095	83.0808	93.5066	78.7044	69.5718
Adss	0.0741409	0.0208333	24	12	9.97735	41.5616	55.8957	56.0954	42.2093
Pafah1b3	0.0741409	0.0208333	24	9	9.96282	45.0231	59.0926	53.1932	39.0836
Eps8	0.0741409	0.0208333	24	18	9.95723	67.9321	66.2739	78.8951	83.4742
Acss2	0.0741409	0.0208333	24	18	9.92255	13.908	10.6409	22.2286	30.3855
Tmem98	0.0741409	0.0208333	24	0	9.91293	162.229	149.433	135.01	150.252
Nat15	0.0741409	0.0208333	24	15	9.86364	38.0806	38.824	52.9622	51.841
Epn1	0.0741409	0.0208333	24	21	9.82383	177.765	156.864	171.963	181.225
Syvn1	0.0741409	0.0208333	24	18	9.82041	45.4822	38.0885	52.2438	59.1032
Atp6v0e2	0.0741409	0.0208333	24	0	9.7061	51.2519	33.9178	29.5113	39.6302
Gp1bb	0.0741409	0.0208333	24	12	9.69733	48.8947	61.6327	70.1417	55.4515
P2ry2	0.0741409	0.0208333	24	15	9.69302	25.1414	29.0342	46.5862	35.0054
Map2k1	0.0741409	0.0208333	24	18	9.56829	64.8778	55.5248	72.1567	75.3091
Trim15	0.0741409	0.0208333	24	15	9.49885	53.9453	62.7164	78.6912	64.8373
Ube2s	0.0741409	0.0208333	24	12	9.47961	46.4531	57.724	62.2986	46.7571
Ets2	0.0741409	0.0208333	24	12	9.46791	37.4133	50.4993	56.3721	42.6788
Rer1	0.0741409	0.0208333	24	3	9.44836	155.355	146.695	132.409	142.917
Snora43	0.0741409	0.0208333	24	0	9.42965	19.8898	9.41055	3.05687	19.2487
Hmgcl	0.0741409	0.0208333	24	6	9.41714	62.7487	64.1216	50.1359	50.0987
Timm8b	0.0741409	0.0208333	24	9	9.36669	104.25	121.316	109.491	100.064
Srsf2	0.0741409	0.0208333	24	9	9.29704	59.5631	72.7334	66.3072	53.1815
Slc35f5	0.0741409	0.0208333	24	0	9.29502	82.4243	65.5525	57.4624	66.8809
2210016F16Rik	0.0741409	0.0208333	24	21	9.26427	102.3	88.3445	95.9102	108.158
Hsd3b3	0.0741409	0.0208333	24	15	9.25076	53.0741	54.0237	96.379	61.7958
Mpdu1	0.0741409	0.0208333	24	6	9.24001	73.6288	85.6487	71.1835	61.9593
Snx15	0.0741409	0.0208333	24	21	9.21668	42.8243	28.4636	36.5972	48.3052
Ppapdc1b	0.0741409	0.0208333	24	0	9.17577	37.8474	24.9914	19.0991	32.1961
Dgkd	0.0741409	0.0208333	24	9	9.13257	40.335	57.2084	44.6106	35.6532
Ptp4a1	0.0741409	0.0208333	24	9	9.12005	15.5754	27.7432	27.0279	13.4003
Pnpla2	0.0741409	0.0208333	24	21	9.06907	72.1676	52.9364	64.2009	72.7513
2410015M20Rik	0.0741409	0.0208333	24	9	9.05376	80.1067	90.6816	84.9578	69.9248
Parp9	0.0741409	0.0208333	24	21	9.03347	36.3498	24.2361	28.4415	41.8783
Gadd45a	0.0741409	0.0208333	24	12	8.95558	46.0357	63.7674	66.745	58.3016
Btg2	0.0741409	0.0208333	24	18	8.93323	48.3455	42.4116	56.2105	59.8136
Ssr2	0.0741409	0.0208333	24	9	8.90283	128.632	141.305	129.924	117.416
Crot	0.0741409	0.0208333	24	0	8.85839	55.4933	44.7393	40.4883	54.7896
Polr1d	0.0741409	0.0208333	24	9	8.8353	115.603	123.933	123.417	102.101
Mrpl27	0.0741409	0.0208333	24	3	8.80023	95.1826	93.0378	80.3426	82.987
Ank3	0.0741409	0.0208333	24	9	8.78546	12.4855	23.6749	23.2793	9.61967
Creld2	0.0741409	0.0208333	24	12	8.74886	28.8352	41.4707	43.6167	31.5067
Itga6	0.0741409	0.0208333	24	12	8.73887	9.48075	20.1699	33.0288	19.0007
Eno1	0.0741409	0.0208333	24	15	8.72036	32.4566	40.1947	48.8	48.5162
Usp2	0.0741409	0.0208333	24	12	8.65537	7.02673	18.8606	24.2536	11.6064
Slc30a2	0.0741409	0.0208333	24	6	8.64901	37.2806	47.5184	35.6085	24.7274
Cpt2	0.0741409	0.0208333	24	21	8.62822	58.8525	47.633	58.323	71.5078
Krtcap2	0.0741409	0.0208333	24	9	8.62684	83.3386	92.0021	83.467	67.7301
Nbr1	0.0741409	0.0208333	24	0	8.61846	61.7404	48.2357	47.2871	58.1591
Hdhd3	0.0741409	0.0208333	24	0	8.61426	57.8928	47.1025	38.2828	51.8573
Psmb7	0.0741409	0.0208333	24	9	8.58244	89.9127	101.709	94.8641	82.3856
Plk3	0.0741409	0.0208333	24	12	8.57471	5.64827	17.7243	20.0928	7.9159
Shb	0.0741409	0.0208333	24	12	8.53011	16.8275	28.7054	33.1193	20.8704
Calm2	0.0741409	0.0208333	24	9	8.51887	306.126	314.498	314.162	298.439
Glo1	0.0741409	0.0208333	24	9	8.46276	74.2649	85.3981	85.0845	72.2814
Erlin1	0.0741409	0.0208333	24	9	8.46181	42.1256	55.2852	43.4867	32.7127
Tgm2	0.0741409	0.0208333	24	21	8.40234	24.2086	14.5071	14.7484	28.8123
B3gnt3	0.0741409	0.0208333	24	18	8.37607	81.5212	75.5765	86.1871	94.6017
Cth	0.0741409	0.0208333	24	12	8.3592	50.8957	63.9567	69.4592	58.8768
Frmd8	0.0741409	0.0208333	24	0	8.35535	56.7681	42.4972	40.5344	49.896
Nlrp9b	0.0741409	0.0208333	24	21	8.3405	32.3308	12.5321	24.6211	32.4846
Ebp	0.0741409	0.0208333	24	18	8.33859	67.5886	63.7884	76.8607	78.1014
Cotl1	0.0741409	0.0208333	24	9	8.28779	19.3814	36.6737	26.0214	18.2076
Npm1	0.0741409	0.0208333	24	9	8.24702	47.5407	59.0252	50.4421	38.6005
Psma5	0.0741409	0.0208333	24	6	8.24221	70.0274	73.4626	60.5748	59.6027
Ndfip1	0.0741409	0.0208333	24	9	8.2187	162.694	175.746	163.072	152.878
Abr	0.0741409	0.0208333	24	21	8.21004	69.9491	60.6311	61.1413	75.0448
Ndufs7	0.0741409	0.0208333	24	9	8.18724	123.643	131.362	126.948	99.9118
2023-09-15	0.0741409	0.0208333	24	6	8.18717	79.9955	87.3951	73.4029	70.8309
Chmp6	0.0741409	0.0208333	24	3	8.14781	86.5441	78.6615	64.9523	77.2078
Mapk6	0.0741409	0.0208333	24	12	8.14559	29.5736	39.153	52.2117	38.7519
Oaz1-ps	0.0741409	0.0208333	24	6	8.14269	317.877	320.689	313.012	287.077
Dhcr7	0.0741409	0.0208333	24	18	8.13049	28.4383	22.0806	29.7461	46.6974
Klf6	0.0741409	0.0208333	24	12	8.11797	51.02	60.2345	69.1869	55.4403
B230312A22Rik	0.0741409	0.0208333	24	12	8.10161	42.4923	51.8271	65.0964	51.5164
Glipr2	0.0741409	0.0208333	24	0	8.10063	24.4195	6.81722	2.68585	10.3232
Surf4	0.0741409	0.0208333	24	6	8.07905	135.553	158.292	130.849	127.936
Coro1c	0.0741409	0.0208333	24	18	8.0642	94.6251	84.2725	99.0736	102.633
Snord35a	0.0741409	0.0208333	24	15	8.05359	0	25.366	32.959	29.6483
Slc37a1	0.0741409	0.0208333	24	15	8.03705	34.2021	34.5468	52.5465	41.7795
Ndufv1	0.0741409	0.0208333	24	9	8.00586	65.1658	75.2603	73.5348	60.9853
Fh1	0.0741409	0.0208333	24	9	8.00261	30.6103	41.9608	40.7142	29.4299
Cmpk2	0.0741409	0.0208333	24	21	7.97486	35.7311	26.3522	27.8214	40.9988
Idh3a	0.0741409	0.0208333	24	9	7.96941	34.4517	46.7059	40.7637	30.477
Acadl	0.0741409	0.0208333	24	9	7.96598	76.4165	85.2397	80.8276	67.1196
Rab11a	0.0741409	0.0208333	24	9	7.93749	59.7985	68.1388	65.5889	51.4786
Canx	0.0741409	0.0208333	24	9	7.91719	59.5875	73.4826	61.3935	52.8954
2210403K04Rik	0.0741409	0.0208333	24	6	7.90796	35.0742	42.3116	30.1014	24.9173
Abhd2	0.0741409	0.0208333	24	15	7.88484	15.9991	17.6544	32.3737	23.5815
Tmcc3	0.0741409	0.0208333	24	18	7.87926	21.1653	16.8794	29.0446	31.286
Dsp	0.0741409	0.0208333	24	18	7.84878	34.7738	24.9981	40.2016	42.1737
Ube2f	0.0741409	0.0208333	24	15	7.82919	33.3719	34.3327	49.0898	40.7591
Sphk2	0.0741409	0.0208333	24	9	7.80596	25.4579	39.8651	28.5223	20.8509
Ifi30	0.0741409	0.0208333	24	9	7.79939	149.131	159.397	157.609	145.815
Bhlhe40	0.0741409	0.0208333	24	15	7.79104	12.9347	18.3809	27.8621	25.4899
Psma4	0.0741409	0.0208333	24	9	7.78525	119.935	140.398	121.478	114.138
Cldn3	0.0741409	0.0208333	24	18	7.78419	616.049	372.678	617.695	623.388
Cdc42	0.0741409	0.0208333	24	3	7.73858	224.479	223.577	208.623	217.183
Abat	0.0741409	0.0208333	24	3	7.63817	47.701	42.9773	33.3858	35.6885
Plcd1	0.0741409	0.0208333	24	12	7.62477	35.4659	42.6546	57.7181	41.9765
Akr1c14	0.0741409	0.0208333	24	9	7.62304	24.06	37.057	26.5141	17.9499
Vdr	0.0741409	0.0208333	24	0	7.61625	95.9223	86.5502	83.0065	95.1764
Dnajb11	0.0741409	0.0208333	24	9	7.59415	71.5673	79.278	78.1444	64.3756
Ptprr	0.0741409	0.0208333	24	9	7.57994	44.6082	55.8723	48.8565	38.6813
Acadvl	0.0741409	0.0208333	24	3	7.57951	75.9193	73.0728	61.1764	66.3776
Srsf5	0.0741409	0.0208333	24	3	7.56534	127.407	122.054	109.109	118.954
Fmo5	0.0741409	0.0208333	24	12	7.54356	65.7556	74.7063	85.0787	72.693
Ap1s1	0.0741409	0.0208333	24	9	7.52411	82.7972	91.3865	84.665	71.9729
Mif	0.0741409	0.0208333	24	12	7.47497	15.6799	27.4601	31.6843	22.3221
Abhd6	0.0741409	0.0208333	24	12	7.43311	111.123	125.368	126.779	119.771
Vcp	0.0741409	0.0208333	24	6	7.42381	82.0284	89.5044	77.0058	73.5293
Parp14	0.0741409	0.0208333	24	21	7.41508	21.3745	14.3835	17.4515	31.8562
Srxn1	0.0741409	0.0208333	24	18	7.41154	272.507	267.409	275.804	285.075
Tmed2	0.0741409	0.0208333	24	6	7.35037	117.71	119.636	112.7	103.856
Dctn2	0.0741409	0.0208333	24	6	7.33553	120.606	123.655	116.739	102.112
Hadha	0.0741409	0.0208333	24	3	7.29126	72.2167	65.4098	54.0978	62.9059
Rab1	0.0741409	0.0208333	24	9	7.28787	93.7829	101.685	98.6732	85.9621
Myl12b	0.0741409	0.0208333	24	15	7.28355	654.145	657.871	765.269	661.012
Gm11545	0.0741409	0.0208333	24	15	7.26867	14.7176	18.412	30.6908	22.9977
Hadhb	0.0741409	0.0208333	24	0	7.25958	74.068	67.2236	55.9969	71.9982
Atp2a2	0.0741409	0.0208333	24	12	7.24919	28.4883	39.2168	40.3093	30.534
Cpne2	0.0741409	0.0208333	24	21	7.22896	33.895	24.9572	26.0549	37.5637
H2afv	0.0741409	0.0208333	24	9	7.20832	57.5097	64.4787	61.09	47.6708
Twf1	0.0741409	0.0208333	24	3	7.14517	54.6528	52.8229	41.5348	45.7313
Pnrc1	0.0741409	0.0208333	24	12	7.14005	57.8783	67.5767	72.8561	62.3594
Ppp1cc	0.0741409	0.0208333	24	9	7.1329	57.0721	64.7556	61.3951	48.9037
Manf	0.0741409	0.0208333	24	9	7.12919	67.9294	78.2319	72.9565	63.0946
Hook2	0.0741409	0.0208333	24	9	7.11081	61.3033	70.5784	65.6761	54.8388
8430427H17Rik	0.0741409	0.0208333	24	21	7.10629	18.9659	8.55269	10.4664	20.1528
Tmem66	0.0741409	0.0208333	24	3	7.10218	119.842	117.014	108.09	108.678
Nos2	0.0741409	0.0208333	24	18	7.02121	9.84228	6.16365	12.836	23.0289
Cdr2	0.0741409	0.0208333	24	12	7.01786	24.7119	45.0023	46.1927	39.5762
Midn	0.0741409	0.0208333	24	12	6.99866	27.1511	40.433	42.0204	35.422
Plvap	0.0741409	0.0208333	24	21	6.99785	41.9748	33.766	35.5581	47.1422
Dhrs7b	0.0741409	0.0208333	24	0	6.99431	66.5929	56.9266	55.3016	65.4182
Slc26a6	0.0741409	0.0208333	24	0	6.9894	134.125	121.114	118.266	125.024
1810035L17Rik	0.0741409	0.0208333	24	9	6.98614	87.531	95.3746	88.076	76.1598
Tmbim4	0.0741409	0.0208333	24	9	6.97384	121.853	133.293	129.488	121.203
Baiap2l1	0.0741409	0.0208333	24	18	6.96606	30.5701	20.9038	33.7308	37.4461
Arhgef16	0.0741409	0.0208333	24	18	6.95602	71.9316	60.4708	72.3885	79.6885
Smpdl3a	0.0741409	0.0208333	24	9	6.95379	38.7279	46.428	44.5501	32.5819
Deb1	0.0741409	0.0208333	24	9	6.91448	28.1556	36.1773	33.453	21.9176
Hsd17b12	0.0741409	0.0208333	24	15	6.9136	55.5071	55.9127	68.7648	62.2096
Lima1	0.0741409	0.0208333	24	6	6.90256	59.6487	74.9385	58.9847	53.1409
Txnrd1	0.0741409	0.0208333	24	21	6.86615	71.0261	63.9156	70.7016	83.0115
Nop10	0.0741409	0.0208333	24	9	6.85473	36.7134	44.7036	43.5763	32.1784
Rnh1	0.0741409	0.0208333	24	12	6.85176	95.7561	102.216	131.769	101.352
Slc25a44	0.0741409	0.0208333	24	21	6.84967	29.3032	19.8147	25.4092	35.2945
Arf4	0.0741409	0.0208333	24	9	6.84253	67.1886	80.5158	70.9414	64.4902
Psmc3	0.0741409	0.0208333	24	9	6.78815	71.3013	81.204	74.6871	65.39
Slc5a12	0.0741409	0.0208333	24	9	6.77936	13.6137	30.9919	15.7366	9.34496
Plin2	0.0741409	0.0208333	24	21	6.75821	50.3789	44.0072	49.7347	64.7266
2010003K15Rik	0.0741409	0.0208333	24	3	6.75301	53.12	44.8847	35.797	43.1073
Mcfd2	0.0741409	0.0208333	24	12	6.74368	117.031	129.583	129.654	123.132
Bach1	0.0741409	0.0208333	24	12	6.72978	13.6969	23.4424	28.0196	18.7304
Hmgn2	0.0741409	0.0208333	24	12	6.72236	21.4536	29.0364	34.8926	23.4617
Stat2	0.0741409	0.0208333	24	18	6.71112	16.7637	15.0437	24.4909	26.2984
Rhebl1	0.0741409	0.0208333	24	0	6.69291	41.6121	34.0805	24.5307	35.9295
Etfa	0.0741409	0.0208333	24	9	6.68188	76.6319	86.4086	84.8696	75.7471
Bpnt1	0.0741409	0.0208333	24	6	6.67424	58.2535	69.8972	57.4845	51.7886
H2afz	0.0741409	0.0208333	24	9	6.66678	83.6695	89.955	85.9877	70.006
Aimp1	0.0741409	0.0208333	24	6	6.66423	42.8952	47.064	38.6153	32.4946
Ptdss1	0.0741409	0.0208333	24	3	6.63867	52.0071	49.2013	34.0909	45.7481
Fam108a	0.0741409	0.0208333	24	0	6.60657	78.5038	67.1088	60.9758	68.267
Ubxn2a	0.0741409	0.0208333	24	18	6.58649	44.566	39.9736	50.5516	52.6174
Pcbp1	0.0741409	0.0208333	24	9	6.58493	83.7101	92.1494	88.0104	77.8247
Nipal1	0.0741409	0.0208333	24	12	6.58338	19.9297	28.4142	31.7729	21.6368
F2rl1	0.0741409	0.0208333	24	15	6.58026	37.0742	41.5598	53.1317	44.1141
Pdhb	0.0741409	0.0208333	24	9	6.57903	27.0862	36.7892	32.22	23.3147
Snora34	0.0741409	0.0208333	24	9	6.52882	5.18059	30.1344	11.1871	5.03167
Rpn2	0.0741409	0.0208333	24	9	6.52228	71.9144	80.9792	78.4856	69.1026
Nlrp6	0.0741409	0.0208333	24	6	6.5063	45.0652	52.736	41.7406	37.658
Rtkn	0.0741409	0.0208333	24	12	6.50468	38.904	45.7544	56.2795	44.7319
Fosl2	0.0741409	0.0208333	24	15	6.50291	34.6765	44.2737	50.4047	48.4939
Ccnl1	0.0741409	0.0208333	24	12	6.48212	33.2262	41.1302	44.7654	34.3352
Gm5779	0.0741409	0.0208333	24	9	6.46875	20.2	26.2988	24.6926	8.55771
Ap2a2	0.0741409	0.0208333	24	3	6.42067	65.728	58.0657	50.6201	55.0132
Cmtm6	0.0741409	0.0208333	24	0	6.40971	50.3322	41.0894	32.531	41.4176
Cenpb	0.0741409	0.0208333	24	6	6.40614	62.4281	63.9957	56.6595	51.645
Aagab	0.0741409	0.0208333	24	0	6.39408	20.9267	11.2875	10.5346	18.9806
Pfkp	0.0741409	0.0208333	24	21	6.3833	84.6685	77.3501	84.4761	95.2124
Pttg1	0.0741409	0.0208333	24	18	6.37531	14.8904	14.4524	20.4631	30.7055
Hnrnpk	0.0741409	0.0208333	24	12	6.3414	76.8469	85.9922	87.7653	78.9744
Gm15292	0.0741409	0.0208333	24	12	6.32478	1.34578	11.5189	12.3765	4.66045
Pank3	0.0741409	0.0208333	24	18	6.31086	19.4175	18.2215	26.9991	28.4897
Txn2	0.0741409	0.0208333	24	6	6.30096	69.2942	77.7526	67.9752	61.2498
Tmem147	0.0741409	0.0208333	24	6	6.29056	38.6428	44.4242	34.4333	30.8413
Pigp	0.0741409	0.0208333	24	6	6.28466	36.3687	37.0259	30.6265	24.9924
Snx22	0.0741409	0.0208333	24	9	6.28031	63.9348	70.7412	68.0996	57.1426
Ahcyl2	0.0741409	0.0208333	24	3	6.27218	54.9805	54.7869	43.0422	48.9848
Suclg2	0.0741409	0.0208333	24	9	6.27062	49.1672	55.0792	53.6363	40.3708
Cobl	0.0741409	0.0208333	24	12	6.2679	50.2595	59.3209	61.4257	52.7588
Vamp3	0.0741409	0.0208333	24	12	6.26426	69.328	76.4014	85.2019	74.5573
Samm50	0.0741409	0.0208333	24	6	6.2265	43.8118	50.218	43.3325	33.0861
Hint2	0.0741409	0.0208333	24	6	6.22611	54.4926	60.8677	54.1627	43.5875
Yipf1	0.0741409	0.0208333	24	6	6.22314	75.0196	75.5047	67.6221	65.3005
Psma6	0.0741409	0.0208333	24	6	6.2102	99.7793	107.791	98.2199	91.7853
Ube2l3	0.0741409	0.0208333	24	3	6.20571	85.8379	74.6584	68.8076	70.2869
Pdia6	0.0741409	0.0208333	24	12	6.20437	43.6026	53.8588	55.1515	47.8591
Gata5	0.0741409	0.0208333	24	18	6.20129	41.6402	37.5243	45.0359	51.6685
Atp6v1d	0.0741409	0.0208333	24	12	6.19129	41.7963	47.6335	60.9737	42.6053
Vwa1	0.0741409	0.0208333	24	9	6.17347	30.3747	39.1935	38.5612	29.9188
Dynll2	0.0741409	0.0208333	24	15	6.16074	28.4236	35.7349	41.5433	40.1877
Nampt	0.0741409	0.0208333	24	15	6.15582	17.076	17.0893	27.1278	24.4488
Cdh1	0.0741409	0.0208333	24	18	6.14617	148.28	144.236	154.78	155.12
Slc22a1	0.0741409	0.0208333	24	6	6.13694	23.5244	28.491	17.45	17.2075
Zfp207	0.0741409	0.0208333	24	9	6.11768	32.1934	42.3185	35.2715	28.0932
Myzap	0.0741409	0.0208333	24	15	6.10887	30.6898	31.4198	41.9501	37.438
Dlst	0.0741409	0.0208333	24	9	6.10657	136.435	146.647	140.84	133.78
Odf3b	0.0741409	0.0208333	24	21	6.09834	31.5615	23.3226	24.3902	33.4
Nbl1	0.0741409	0.0208333	24	18	6.08289	116.584	78.8229	121.094	122.319
Prdx3	0.0741409	0.0208333	24	9	6.0703	30.6685	39.4846	36.9855	28.6322
Tmem19	0.0741409	0.0208333	24	0	6.02529	40.9734	31.7385	27.1649	34.9721
Ifi27l2a	0.0741409	0.0208333	24	6	6.01515	29.2981	33.7762	24.8754	21.1855
Psmd3	0.0741409	0.0208333	24	6	6.00192	46.5732	47.8757	39.9927	37.4802
0610011F06Rik	0.0741409	0.0208333	24	6	5.99411	53.2538	58.6515	52.4791	42.4723
0610040J01Rik	0.0741409	0.0208333	24	9	5.98757	33.2413	40.2366	38.8782	28.9381
Leng9	0.0741409	0.0208333	24	18	5.98615	46.242	33.6315	49.8112	51.8858
Zbtb7b	0.0741409	0.0208333	24	18	5.95978	90.2538	80.8809	90.7487	97.2428
Fam173a	0.0741409	0.0208333	24	6	5.95561	63.5172	64.0554	55.8974	54.8302
Abhd12	0.0741409	0.0208333	24	6	5.95455	122.466	122.973	117.359	110.909
Paqr4	0.0741409	0.0208333	24	12	5.93149	41.7603	50.0244	50.3613	41.8486
Litaf	0.0741409	0.0208333	24	18	5.92983	88.8675	66.0595	91.7318	94.4582
Snora65	0.0741409	0.0208333	24	0	5.92106	20.7224	12.9147	11.1871	20.1267
Gng12	0.0741409	0.0208333	24	18	5.91106	103.588	100.266	108.091	112.482
Net1	0.0741409	0.0208333	24	0	5.88635	74.1547	68.605	54.8915	69.947
Per2	0.0741409	0.0208333	24	15	5.88165	2.05113	5.21013	16.71	7.5964
Hsd17b10	0.0741409	0.0208333	24	9	5.88125	43.3297	48.8746	47.8545	32.4421
Cyp2c68	0.0741409	0.0208333	24	6	5.87751	19.6874	28.6427	18.4195	13.2865
Ptk6	0.0741409	0.0208333	24	21	5.87687	13.4296	7.18148	8.77532	19.1495
Ltbr	0.0741409	0.0208333	24	6	5.87316	64.019	67.3852	61.018	53.7744
Ocln	0.0741409	0.0208333	24	21	5.8728	49.9317	42.1466	44.5586	53.3843
Tspan31	0.0741409	0.0208333	24	9	5.83763	55.1841	62.0624	59.685	50.052
Mrpl23	0.0741409	0.0208333	24	9	5.8331	68.3026	95.7903	71.0295	65.53
Pgam1	0.0741409	0.0208333	24	12	5.8266	77.6446	86.6442	92.2113	84.7308
Bpgm	0.0741409	0.0208333	24	21	5.82345	51.6119	46.1215	46.7452	61.1081
Mrpl12	0.0741409	0.0208333	24	9	5.81093	94.484	99.9626	96.6795	70.8453
Tor1aip2	0.0741409	0.0208333	24	0	5.80673	73.0243	67.4343	59.1895	70.0234
Trim30d	0.0741409	0.0208333	24	0	5.80669	33.4697	24.5844	23.0631	30.6016
Tnks1bp1	0.0741409	0.0208333	24	15	5.80627	14.1333	16.2706	25.8741	20.9524
Mertk	0.0741409	0.0208333	24	15	5.79046	15.4336	15.5446	26.6289	20.8929
Bax	0.0741409	0.0208333	24	6	5.77667	54.9878	56.649	51.2027	39.8738
Ankrd13a	0.0741409	0.0208333	24	6	5.77342	84.2827	87.3175	81.247	74.0235
Cmas	0.0741409	0.0208333	24	9	5.76554	67.5343	72.9701	69.1993	56.5984
Trim40	0.0741409	0.0208333	24	18	5.7625	40.358	32.5203	41.9849	47.1922
Rdh11	0.0741409	0.0208333	24	18	5.75659	14.6994	13.7165	19.5831	25.1149
Lmbr1l	0.0741409	0.0208333	24	0	5.75136	37.6331	28.0044	26.8043	33.4429
Ncln	0.0741409	0.0208333	24	6	5.72053	33.3452	38.1265	28.1529	27.1387
Slc25a11	0.0741409	0.0208333	24	3	5.71176	94.3678	93.3048	77.4355	88.9827
Ptprf	0.0741409	0.0208333	24	0	5.7061	40.9468	33.797	30.9239	39.9134
Cyb561	0.0741409	0.0208333	24	9	5.70593	35.8984	45.7257	39.5184	33.2069
Psmc2	0.0741409	0.0208333	24	9	5.7049	41.5626	50.2824	47.5651	40.149
Aldh16a1	0.0741409	0.0208333	24	9	5.69833	56.9239	63.9781	58.8688	49.8057
Zfyve1	0.0741409	0.0208333	24	0	5.69394	25.6379	17.0426	16.4787	23.9883
Irf6	0.0741409	0.0208333	24	21	5.68302	46.8593	32.4104	42.2629	47.6209
Espn	0.0741409	0.0208333	24	18	5.6809	256.338	198.958	256.648	261.694
Sft2d1	0.0741409	0.0208333	24	6	5.67252	46.076	52.2596	42.5486	39.7427
Tapbp	0.0741409	0.0208333	24	0	5.67241	135.238	129.89	120.152	134.014
1810022K09Rik	0.0741409	0.0208333	24	9	5.67068	69.4299	76.4911	72.7106	63.7327
Add1	0.0741409	0.0208333	24	18	5.66743	62.0608	60.1002	67.6791	70.5118
Irf9	0.0741409	0.0208333	24	15	5.63872	17.8504	18.6847	28.3623	24.1215
Dtx3l	0.0741409	0.0208333	24	21	5.63221	17.9271	10.8524	12.8092	21.6648
Gclc	0.0741409	0.0208333	24	15	5.63115	33.8665	38.8692	54.8447	39.1756
Mpp5	0.0741409	0.0208333	24	12	5.62709	12.508	20.5119	21.5164	13.6045
Rab9	0.0741409	0.0208333	24	21	5.62486	27.8722	19.7937	22.672	30.503
Kcnk5	0.0741409	0.0208333	24	15	5.61429	24.5161	25.4814	35.9537	29.9234
Tmem86a	0.0741409	0.0208333	24	3	5.59	67.7411	62.7118	37.1509	62.4708
Rab17	0.0741409	0.0208333	24	0	5.54524	91.1866	72.8841	69.535	74.7631
Atp6v1h	0.0741409	0.0208333	24	9	5.54262	23.9059	30.1756	28.3294	18.9222
Pvrl2	0.0741409	0.0208333	24	0	5.54022	95.8959	88.1492	82.2327	90.1561
Mrps18c	0.0741409	0.0208333	24	6	5.52636	88.4645	95.2894	86.7925	81.3305
Churc1	0.0741409	0.0208333	24	9	5.51193	29.2174	36.102	33.5868	24.8813
Pex16	0.0741409	0.0208333	24	3	5.51009	69.3391	68.4644	58.8086	63.41
Srebf2	0.0741409	0.0208333	24	15	5.50207	41.5144	45.9481	53.1463	49.8784
Batf2	0.0741409	0.0208333	24	21	5.50111	36.7362	31.5497	35.0892	50.9509
Cops7a	0.0741409	0.0208333	24	9	5.49836	43.3394	48.9201	48.6798	38.7088
Akr7a5	0.0741409	0.0208333	24	6	5.46541	43.4844	46.744	39.0874	35.6825
Jup	0.0741409	0.0208333	24	15	5.4642	61.9066	68.6796	77.0471	68.9942
Fdx1	0.0741409	0.0208333	24	9	5.45547	43.747	49.3025	47.7087	37.8338
Acadm	0.0741409	0.0208333	24	0	5.45162	82.465	74.0663	68.3486	75.3694
Acp6	0.0741409	0.0208333	24	9	5.44278	50.6178	58.4239	52.6755	45.0871
Myh9	0.0741409	0.0208333	24	18	5.4058	35.7037	33.1109	41.5201	42.5844
Dio1	0.0741409	0.0208333	24	3	5.40565	35.8903	34.4504	25.9472	29.104
Rnd2	0.0741409	0.0208333	24	0	5.40177	30.463	24.5756	19.7016	29.0927
Spcs1	0.0741409	0.0208333	24	6	5.39728	74.2045	75.3593	69.8576	64.4404
Slc22a4	0.0741409	0.0208333	24	6	5.39024	22.9495	29.7618	19.9161	17.5493
Nipsnap3b	0.0741409	0.0208333	24	0	5.38911	59.9074	53.2356	46.1077	54.6786
Atp9a	0.0741409	0.0208333	24	9	5.37893	79.8096	84.8809	82.9482	72.4239
Tmem41b	0.0741409	0.0208333	24	15	5.36991	31.2949	35.7023	48.8993	36.3577
Clcn2	0.0741409	0.0208333	24	6	5.36973	52.6957	60.955	52.5025	45.9603
Cd151	0.0741409	0.0208333	24	21	5.36729	119.581	112.381	116.043	124.024
Eif3c	0.0741409	0.0208333	24	9	5.36623	53.7884	58.934	57.0521	47.0197
Dram2	0.0741409	0.0208333	24	6	5.36503	32.4171	36.2789	27.0553	26.4661
Acot7	0.0741409	0.0208333	24	18	5.35761	19.1772	14.5654	21.9824	26.9138
Dsc2	0.0741409	0.0208333	24	18	5.35039	37.2229	31.5416	41.1762	42.7215
Snrpe	0.0741409	0.0208333	24	6	5.34912	62.8446	70.2182	61.2787	56.6545
Pigr	0.0741409	0.0208333	24	6	5.34764	60.8373	105.427	57.7418	55.7955
Tmem106a	0.0741409	0.0208333	24	15	5.33558	63.3704	63.9996	73.8574	68.6039
Irgm1	0.0741409	0.0208333	24	15	5.3156	12.2486	18.7345	23.7461	23.5834
Dusp12	0.0741409	0.0208333	24	9	5.31504	29.9674	35.3215	30.0565	20.3774
Nr1h2	0.0741409	0.0208333	24	3	5.3121	65.0541	62.3587	55.9575	56.4304
Abhd4	0.0741409	0.0208333	24	0	5.30974	55.4318	47.1374	44.1259	50.8497
Slc35c1	0.0741409	0.0208333	24	9	5.30072	47.8149	53.2337	52.3041	42.7302
Jak2	0.0741409	0.0208333	24	15	5.27134	29.5211	33.1425	40.5132	37.06
Ces1d	0.0741409	0.0208333	24	18	5.26991	7.01101	1.66681	7.79669	15.7867
Tnfrsf1a	0.0741409	0.0208333	24	15	5.2672	97.8331	103.605	108.886	107.45
Hspd1	0.0741409	0.0208333	24	12	5.24514	13.9519	21.1859	22.205	14.6035
Prdx6	0.0741409	0.0208333	24	9	5.23446	26.0812	38.0526	30.2879	25.3528
Galnt6	0.0741409	0.0208333	24	15	5.20593	57.5929	60.7402	68.0093	65.0484
Echs1	0.0741409	0.0208333	24	9	5.18076	63.1216	72.5735	66.5112	61.3097
Gpr89	0.0741409	0.0208333	24	9	5.17489	46.3698	52.917	51.4417	43.3521
Gm3336	0.0741409	0.0208333	24	0	5.17199	50.7226	32.8746	31.6341	36.5103
Mrpl13	0.0741409	0.0208333	24	9	5.17153	24.2299	31.4271	28.5884	21.1583
1110059E24Rik	0.0741409	0.0208333	24	0	5.16665	33.0325	23.9544	22.4992	28.0346
Rin2	0.0741409	0.0208333	24	3	5.14826	16.6647	14.4322	6.88692	9.64849
Gm129	0.0741409	0.0208333	24	9	5.13658	0.522255	8.53971	6.71544	0.20446
Bid	0.0741409	0.0208333	24	0	5.13275	23.3197	14.0615	12.3312	17.5906
Slc5a6	0.0741409	0.0208333	24	21	5.10277	39.4339	33.8213	35.9373	44.7575
Srsf3	0.0741409	0.0208333	24	9	5.10156	24.6144	35.1588	24.8497	20.0399
Slc2a9	0.0741409	0.0208333	24	6	5.09905	20.4997	23.5222	15.7443	13.8553
Hspa12a	0.0741409	0.0208333	24	18	5.09417	12.2921	8.936	17.2604	18.3762
Specc1l	0.0741409	0.0208333	24	12	5.07897	23.6999	32.0734	34.6094	28.6174
Agpat1	0.0741409	0.0208333	24	18	5.06741	88.7328	85.1171	93.2056	94.9771
Ryk	0.0741409	0.0208333	24	9	5.05426	30.2469	35.0121	32.0483	21.6384
Fam125a	0.0741409	0.0208333	24	6	5.05139	67.0894	71.8174	67.0549	56.1158
Tnfrsf21	0.0741409	0.0208333	24	12	5.0442	9.97908	14.7348	32.3385	14.0692
Chd3	0.0741409	0.0208333	24	18	5.04333	15.7925	12.2422	19.2401	23.0593
Msra	0.0741409	0.0208333	24	9	5.01699	89.9107	96.9725	92.671	85.5426
Idh2	0.0741409	0.0208333	24	9	5.00738	34.2271	39.5973	37.9427	29.1499
Phb2	0.0741409	0.0208333	24	9	5.00207	83.935	88.651	88.0032	70.9866
Hsd17b7	0.0741409	0.0208333	24	18	4.98864	11.6936	10.7152	16.8199	19.6989
Gtf2ird1	0.0741409	0.0208333	24	21	4.98292	10.9888	4.91612	5.16435	13.1855
Fez2	0.0741409	0.0208333	24	21	4.98203	41.2329	33.0774	35.3204	41.2562
Snrpd3	0.0741409	0.0208333	24	9	4.97694	48.1911	58.283	48.9111	44.2188
Mat2a	0.0741409	0.0208333	24	9	4.96343	27.8513	36.8487	29.5031	24.4618
Abhd3	0.0741409	0.0208333	24	3	4.9542	37.4932	32.8731	23.9312	32.4225
Cks2	0.0741409	0.0208333	24	12	4.93568	16.7986	21.452	27.8734	18.0385
Mmd	0.0741409	0.0208333	24	15	4.89664	10.9309	11.6245	20.0954	16.3098
Rpn1	0.0741409	0.0208333	24	9	4.89109	39.2343	47.0312	40.7276	34.6904
Vat1	0.0741409	0.0208333	24	3	4.88879	110.217	100.912	96.3028	100.072
Suv420h2	0.0741409	0.0208333	24	18	4.88027	27.4666	23.9629	32.5452	32.6878
Hopx	0.0741409	0.0208333	24	6	4.86695	19.0612	27.3601	15.791	14.4726
Lama3	0.0741409	0.0208333	24	21	4.86495	11.6985	3.92394	8.0512	14.0368
Golph3l	0.0741409	0.0208333	24	6	4.85305	51.2502	51.7989	47.2234	38.2094
Aldh3b1	0.0741409	0.0208333	24	0	4.8475	37.7394	33.1098	25.7823	34.8635
Chchd3	0.0741409	0.0208333	24	6	4.83509	70.5966	78.2617	69.9033	65.2793
Cebpa	0.0741409	0.0208333	24	21	4.82961	22.7882	14.5237	18.2846	23.6803
Hspa9	0.0741409	0.0208333	24	9	4.82961	22.0562	29.0388	23.9682	17.2906
Bzw1	0.0741409	0.0208333	24	9	4.82307	36.7344	43.7677	39.9516	33.3432
Ecm1	0.0741409	0.0208333	24	21	4.81911	24.6809	19.8409	23.4094	32.1999
Ugt1a6b	0.0741409	0.0208333	24	9	4.81377	66.6222	72.3029	68.0097	60.075
Stt3a	0.0741409	0.0208333	24	6	4.81282	37.0356	41.8813	33.0222	32.282
Nsfl1c	0.0741409	0.0208333	24	6	4.81094	46.5931	50.724	42.1124	41.5973
2610029I01Rik	0.0741409	0.0208333	24	21	4.81045	44.4338	37.7087	38.7628	45.6437
Dgkz	0.0741409	0.0208333	24	0	4.80967	66.4498	58.8064	57.8155	63.7759
Sema4b	0.0741409	0.0208333	24	18	4.8056	20.4335	19.4884	26.4015	27.1127
Clec2d	0.0741409	0.0208333	24	18	4.80543	86.0152	70.6995	86.3084	90.5458
Zc3h11a	0.0741409	0.0208333	24	9	4.80486	27.0102	33.1787	31.7259	24.3042
1500012F01Rik	0.0741409	0.0208333	24	6	4.79574	35.5318	39.2018	32.4852	28.684
S100a14	0.0741409	0.0208333	24	12	4.78998	13.2069	18.605	22.0409	13.8909
Bloc1s2	0.0741409	0.0208333	24	6	4.78793	41.2804	48.986	39.9139	36.7663
Cry1	0.0741409	0.0208333	24	21	4.78522	11.4211	4.34755	10.5009	16.962
Ash2l	0.0741409	0.0208333	24	0	4.75038	38.4033	30.97	27.5675	33.5703
Ndufab1	0.0741409	0.0208333	24	9	4.74935	69.3655	75.0925	71.1778	63.4716
Dpy30	0.0741409	0.0208333	24	6	4.72506	38.3246	43.561	38.0251	30.496
Ralgds	0.0741409	0.0208333	24	18	4.72015	32.8767	22.4099	35.1635	37.3269
Inpp5a	0.0741409	0.0208333	24	15	4.71792	28.4761	31.3444	39.4519	33.7129
Wdr1	0.0741409	0.0208333	24	9	4.71463	154.175	160.92	154.595	148.005
Picalm	0.0741409	0.0208333	24	15	4.71248	64.814	68.6508	75.3443	71.4494
Dctpp1	0.0741409	0.0208333	24	6	4.69434	26.6163	26.9837	21.9845	18.3379
Endog	0.0741409	0.0208333	24	15	4.67491	9.71545	12.412	23.5416	14.123
Rab8a	0.0741409	0.0208333	24	6	4.67185	134.412	139.817	131.476	129.539
Slc25a37	0.0741409	0.0208333	24	9	4.66828	62.4077	66.809	63.9248	54.5814
Malat1	0.0741409	0.0208333	24	18	4.66351	44.7277	26.5965	46.7956	49.1245
Gtpbp2	0.0741409	0.0208333	24	18	4.65895	60.648	53.5234	62.2863	65.0626
Dnajc30	0.0741409	0.0208333	24	0	4.65821	34.6166	25.5293	23.3408	27.7326
Ehf	0.0741409	0.0208333	24	9	4.64283	16.3121	20.9786	20.2037	11.7383
Mrpl48	0.0741409	0.0208333	24	9	4.64201	28.822	35.1004	32.8422	25.991
Tmem97	0.0741409	0.0208333	24	12	4.62971	41.0926	46.6841	48.9322	41.4289
Wdtc1	0.0741409	0.0208333	24	0	4.62844	26.0323	18.7612	17.9386	23.7587
Rab7	0.0741409	0.0208333	24	12	4.62024	110.413	114.769	123.052	113.374
Elovl6	0.0741409	0.0208333	24	15	4.61007	7.96033	8.79152	15.1451	14.646
Cxcl16	0.0741409	0.0208333	24	15	4.60362	23.4609	27.118	33.4239	30.176
Rpph1	0.0741409	0.0208333	24	0	4.60012	45.0443	39.9572	36.4614	44.3854
Stip1	0.0741409	0.0208333	24	15	4.59998	15.382	16.7553	26.11	19.7189
Morf4l2	0.0741409	0.0208333	24	9	4.59669	49.7368	59.5894	53.5567	49.2229
Pdzd11	0.0741409	0.0208333	24	15	4.59595	55.9241	59.0501	64.6561	63.3174
Khnyn	0.0741409	0.0208333	24	21	4.56739	14.2985	7.74877	10.1219	16.4907
Psma3	0.0741409	0.0208333	24	9	4.55539	68.5642	73.1609	69.4589	61.171
Rassf3	0.0741409	0.0208333	24	21	4.55274	25.155	18.084	23.7114	29.5175
Auh	0.0741409	0.0208333	24	3	4.51276	22.2283	18.2086	10.5032	17.1697
Mapre2	0.0741409	0.0208333	24	15	4.503	8.65248	13.6188	21.2045	13.8032
Urod	0.0741409	0.0208333	24	9	4.49009	20.022	27.2706	23.2681	17.8168
Arl8a	0.0741409	0.0208333	24	21	4.48567	50.9329	43.9731	48.4924	54.22
Psmc5	0.0741409	0.0208333	24	9	4.48217	96.7935	103.882	98.3554	92.7664
Etfdh	0.0741409	0.0208333	24	0	4.47351	41.9062	36.1033	30.6452	37.4953
Slc37a4	0.0741409	0.0208333	24	9	4.47178	31.4056	37.1624	35.315	28.4237
Ddr1	0.0741409	0.0208333	24	21	4.47001	32.8248	24.5106	32.2925	36.6214
Sdr39u1	0.0741409	0.0208333	24	21	4.45658	36.3605	28.3208	33.1665	37.7319
Fam114a2	0.0741409	0.0208333	24	21	4.45541	34.853	28.3246	33.65	39.7234
Heph	0.0741409	0.0208333	24	15	4.43904	61.2463	66.3781	71.3101	68.8698
Sf3b5	0.0741409	0.0208333	24	12	4.43504	32.2843	36.4998	41.3988	33.0701
Rhof	0.0741409	0.0208333	24	15	4.41376	40.9039	45.7169	53.2431	45.8617
Pnrc2	0.0741409	0.0208333	24	0	4.39902	41.1673	33.6111	33.0469	37.933
Immt	0.0741409	0.0208333	24	6	4.3911	50.8275	54.6329	48.8121	44.2284
Ncstn	0.0741409	0.0208333	24	6	4.38968	59.1364	59.7127	54.4558	51.9774
Gpd2	0.0741409	0.0208333	24	12	4.38466	26.7839	34.6884	35.1686	30.6714
Cnih	0.0741409	0.0208333	24	9	4.38014	44.5116	48.9907	48.4151	40.5053
Tmem126a	0.0741409	0.0208333	24	9	4.37225	24.5166	28.6388	26.7608	18.3692
Lhfpl2	0.0741409	0.0208333	24	12	4.37194	42.3018	46.6109	53.591	45.5344
Golt1a	0.0741409	0.0208333	24	0	4.36543	76.8193	71.3332	67.7673	74.6285
Serpinh1	0.0741409	0.0208333	24	18	4.36175	17.3816	13.6535	17.7658	29.1384
Mkrn1	0.0741409	0.0208333	24	3	4.35507	119.789	106.59	102.484	106.526
Apoa1bp	0.0741409	0.0208333	24	9	4.35479	38.5778	44.136	41.8445	35.0855
Ssfa2	0.0741409	0.0208333	24	12	4.3521	24.693	28.7962	35.6323	27.2306
Cnih4	0.0741409	0.0208333	24	9	4.34927	19.6777	25.1658	23.9213	17.1078
Hdac1	0.0741409	0.0208333	24	9	4.34701	38.4515	45.2519	40.9771	35.4823
Stk38	0.0741409	0.0208333	24	21	4.34231	18.2643	12.0465	14.0074	20.0715
Nars	0.0741409	0.0208333	24	3	4.34224	73.8578	71.6618	58.9585	69.7639
Hyal2	0.0741409	0.0208333	24	3	4.34019	61.8246	60.9634	53.0824	57.4297
Ncoa4	0.0741409	0.0208333	24	15	4.33121	25.1252	31.7185	35.9515	33.1427
Phb	0.0741409	0.0208333	24	9	4.32594	20.9068	28.6152	23.9229	19.3957
Spna2	0.0741409	0.0208333	24	18	4.3195	44.8712	39.3478	46.5175	49.9189
Mgat3	0.0741409	0.0208333	24	0	4.3177	53.6004	47.2265	45.6704	51.5088
BC030870	0.0741409	0.0208333	24	0	4.30023	46.3316	41.1664	38.8959	45.8936
Cr1l	0.0741409	0.0208333	24	6	4.30023	31.5932	32.0938	26.4048	25.1193
Tra2b	0.0741409	0.0208333	24	9	4.29748	20.5068	30.4111	23.6652	19.6135
Dmbt1	0.0741409	0.0208333	24	12	4.29172	4.85384	9.2521	12.9476	5.20704
Trim25	0.0741409	0.0208333	24	18	4.28666	30.188	24.8704	34.2181	34.2295
Rbck1	0.0741409	0.0208333	24	6	4.28454	51.4539	58.4686	51.2384	46.5656
Tpd52	0.0741409	0.0208333	24	9	4.27941	157.361	163.198	158.121	151.854
Dedd2	0.0741409	0.0208333	24	9	4.27407	35.5192	41.6846	41.1864	35.2629
Kpna2	0.0741409	0.0208333	24	12	4.26417	21.691	28.9807	29.3459	24.5747
Rtp4	0.0741409	0.0208333	24	21	4.25367	20.8365	16.8261	19.058	27.4783
Zmiz1	0.0741409	0.0208333	24	21	4.24508	27.7512	20.6307	24.9151	29.8015
Tmem179b	0.0741409	0.0208333	24	0	4.24444	62.0791	54.2163	53.1119	57.2542
Stx5a	0.0741409	0.0208333	24	6	4.24059	47.8747	51.4601	44.5826	42.758
Rnf187	0.0741409	0.0208333	24	6	4.23193	38.2302	39.1839	33.1758	32.2686
Reep3	0.0741409	0.0208333	24	21	4.22882	29.8369	23.7404	25.0706	30.935
Krtcap3	0.0741409	0.0208333	24	12	4.22822	22.9167	28.8712	30.8397	24.835
Dsg2	0.0741409	0.0208333	24	12	4.21262	65.3787	69.3504	76.8808	65.4803
Slc39a7	0.0741409	0.0208333	24	6	4.19555	28.6517	30.8411	24.8028	22.8232
Gtf2a2	0.0741409	0.0208333	24	9	4.18476	22.6351	27.8453	26.8602	20.2341
Mgrn1	0.0741409	0.0208333	24	9	4.18395	36.4079	41.6056	40.9705	34.3342
Smox	0.0741409	0.0208333	24	21	4.17508	17.953	9.36994	17.6262	21.5625
Ccdc25	0.0741409	0.0208333	24	0	4.17009	35.6177	29.7598	28.7484	34.6853
Pxn	0.0741409	0.0208333	24	21	4.1655	37.4063	30.1527	33.8677	38.3959
Snx5	0.0741409	0.0208333	24	9	4.16341	39.527	43.4523	40.8971	27.7648
Ttc4	0.0741409	0.0208333	24	21	4.15924	28.3067	21.4843	25.8641	30.8058
Nipsnap1	0.0741409	0.0208333	24	3	4.15438	11.7853	10.3698	4.70257	5.70216
Sccpdh	0.0741409	0.0208333	24	3	4.10387	22.9127	22.4656	14.7313	19.0395
Aspscr1	0.0741409	0.0208333	24	3	4.09772	60.6576	56.0786	51.739	53.4071
Fam134c	0.0741409	0.0208333	24	0	4.09641	45.3263	40.4384	34.5141	41.2126
2410006H16Rik	0.0741409	0.0208333	24	6	4.08704	48.8808	51.1296	47.2763	32.2385
Tomm20	0.0741409	0.0208333	24	6	4.0737	12.0609	17.5706	11.3533	6.75604
Mgat4c	0.0741409	0.0208333	24	9	4.07078	38.4236	43.1795	41.321	34.563
Rnf128	0.0741409	0.0208333	24	6	4.0648	133.419	137.088	131.237	127.773
Ddb1	0.0741409	0.0208333	24	6	4.0583	35.6866	39.3456	32.9062	30.6474
Cops5	0.0741409	0.0208333	24	6	4.05338	43.9064	45.6303	39.9857	38.0863
Nqo1	0.0741409	0.0208333	24	6	4.05204	23.5537	27.6133	21.4909	18.2152
Dera	0.0741409	0.0208333	24	12	4.03411	69.6116	74.5409	76.7001	70.2192
Psmd13	0.0741409	0.0208333	24	6	4.02054	63.4775	68.3426	63.1001	57.3482
Mir1199	0.0741409	0.0208333	24	0	4.01661	45.1916	12.5148	10.8407	14.6276
Ticam1	0.0741409	0.0208333	24	21	4.01227	39.735	31.7571	38.0935	41.8763
Fkbp5	0.0741409	0.0208333	24	15	4.00864	5.81845	7.17793	47.2968	9.59783
Tmem183a	0.0741409	0.0208333	24	0	4.00463	64.9192	56.4645	55.407	59.1826
Ppm1j	0.0741409	0.0208333	24	9	4.00385	12.9356	18.5328	16.3026	10.5752
Tom1l1	0.0741409	0.0208333	24	12	4.0036	37.6907	42.5996	45.6692	39.2542
Arhgef5	0.0741409	0.0208333	24	18	4.00304	38.415	31.5334	39.1355	42.1891
Tep1	0.0741409	0.0208333	24	21	4.00074	23.1074	18.1578	18.6745	25.0407
Plec	0.0741409	0.0208333	24	18	3.99402	45.3529	37.9332	48.6927	49.1185
Ddx39b	0.0741409	0.0208333	24	9	3.98996	38.2045	42.6311	40.3313	33.4726
Ikbke	0.0741409	0.0208333	24	3	3.98529	29.7523	29.4653	23.7004	24.2451
Ppp1r15b	0.0741409	0.0208333	24	12	3.97924	33.3974	40.0728	44.1572	39.5776
Mpnd	0.0741409	0.0208333	24	6	3.96072	98.5459	100.281	96.5468	87.2203
Mir214	0.0741409	0.0208333	24	21	3.95885	3.73244	0	0.00495428	14.2571
Unc5b	0.0741409	0.0208333	24	21	3.95676	23.6973	17.8409	23.2814	28.6164
1110021L09Rik	0.0741409	0.0208333	24	0	3.93912	18.2561	13.7848	10.9899	17.6601
Mrpl53	0.0741409	0.0208333	24	12	3.9324	53.8019	60.2282	60.4927	55.7965
Tra2a	0.0741409	0.0208333	24	15	3.92929	14.6164	17.9081	23.5113	20.1269
Fam20a	0.0741409	0.0208333	24	0	3.92787	20.0539	14.6214	13.6875	19.3647
Gucy2c	0.0741409	0.0208333	24	12	3.92603	69.4683	76.042	77.6917	73.1609
4833420G17Rik	0.0741409	0.0208333	24	3	3.92342	23.8256	19.2666	14.6883	17.3068
Leprot	0.0741409	0.0208333	24	3	3.90493	54.3836	46.6832	43.0016	45.9274
Wipi2	0.0741409	0.0208333	24	0	3.90397	32.1899	25.6656	22.8568	27.3746
Cant1	0.0741409	0.0208333	24	9	3.90213	64.3784	68.9748	68.0855	61.645
Dnajb1	0.0741409	0.0208333	24	12	3.89994	28.0969	31.7738	51.8751	29.9232
Hspb1	0.0741409	0.0208333	24	18	3.88597	6.88152	6.84911	12.0651	12.6567
Cgn	0.0741409	0.0208333	24	18	3.88127	26.8821	24.1233	30.2487	31.7346
Tomm22	0.0741409	0.0208333	24	9	3.87883	112.757	116.414	113.438	99.0486
Abtb1	0.0741409	0.0208333	24	0	3.87463	24.1326	17.9974	15.5115	20.3354
Fam3c	0.0741409	0.0208333	24	18	3.87077	31.3751	24.2537	32.2228	35.0245
Ipmk	0.0741409	0.0208333	24	18	3.87035	114.387	85.6032	116.388	118.036
Bmp2	0.0741409	0.0208333	24	9	3.86869	19.2818	25.1104	22.5682	17.4545
Cxcl14	0.0741409	0.0208333	24	21	3.8677	25.1613	12.8294	23.4651	27.1116
Qars	0.0741409	0.0208333	24	6	3.86112	72.2362	85.9246	71.711	68.5959
Snd1	0.0741409	0.0208333	24	6	3.85451	21.2987	22.3498	17.4916	15.2547
Appl2	0.0741409	0.0208333	24	0	3.85136	21.5157	14.0372	11.9677	15.5988
Glrx5	0.0741409	0.0208333	24	6	3.85062	36.5232	38.1098	34.4794	26.5677
Fhl2	0.0741409	0.0208333	24	18	3.85062	22.3968	19.2775	25.211	27.3545
Id2	0.0741409	0.0208333	24	12	3.83174	33.9034	39.0093	42.2078	36.4759
Tuba1a	0.0741409	0.0208333	24	21	3.82634	11.3298	7.00648	10.1508	16.65
Ncor1	0.0741409	0.0208333	24	21	3.80583	20.9529	15.8566	17.1627	22.8309
Gfpt1	0.0741409	0.0208333	24	6	3.79695	28.4312	40.3186	28.3927	24.8514
Bola3	0.0741409	0.0208333	24	9	3.79529	38.7973	43.1951	40.8524	34.5155
Vim	0.0741409	0.0208333	24	18	3.79207	23.1164	19.7137	23.2889	32.484
Tm9sf2	0.0741409	0.0208333	24	6	3.79154	89.0033	92.1908	88.3344	82.1356
Mrpl28	0.0741409	0.0208333	24	9	3.79112	30.5934	34.1677	32.8538	25.3904
Eif3m	0.0741409	0.0208333	24	9	3.77835	33.6157	37.3734	33.9421	27.013
Ddit3	0.0741409	0.0208333	24	15	3.76259	36.5719	38.6648	47.4374	40.1193
Panx1	0.0741409	0.0208333	24	0	3.76188	57.1596	51.9345	47.2021	52.6172
Crlf3	0.0741409	0.0208333	24	9	3.76084	7.01186	14.288	10.2732	6.72745
Sh3glb2	0.0741409	0.0208333	24	6	3.75583	42.861	44.3925	39.7972	36.8332
Hmgb1	0.0741409	0.0208333	24	9	3.75067	32.6718	37.6491	37.0048	31.3736
Banf1	0.0741409	0.0208333	24	6	3.73939	80.9368	84.8113	79.8287	75.3428
Eif3l	0.0741409	0.0208333	24	6	3.73423	34.7539	37.8494	33.6412	28.4001
Phpt1	0.0741409	0.0208333	24	9	3.73031	19.1521	24.3207	20.5276	15.1453
Sema7a	0.0741409	0.0208333	24	12	3.71274	3.68632	9.32619	10.8347	5.97335
Tspan15	0.0741409	0.0208333	24	3	3.71199	62.2915	59.8658	54.0178	57.6404
Per3	0.0741409	0.0208333	24	12	3.70753	0.782242	4.5543	8.13291	1.41848
Jtb	0.0741409	0.0208333	24	6	3.70697	42.878	45.0666	40.4151	37.0446
Cx3cl1	0.0741409	0.0208333	24	0	3.69439	45.6097	42.1266	33.9213	44.3387
Nostrin	0.0741409	0.0208333	24	3	3.69357	108.613	107.661	101.665	104.162
Scrn2	0.0741409	0.0208333	24	0	3.68622	37.7515	32.0462	27.6468	32.3677
Kctd2	0.0741409	0.0208333	24	0	3.68127	23.6348	16.8474	15.1453	18.7701
Il10rb	0.0741409	0.0208333	24	18	3.68092	74.1501	72.4142	78.2965	78.679
Slc5a8	0.0741409	0.0208333	24	3	3.68017	57.615	43.5119	40.0422	43.3805
Hbp1	0.0741409	0.0208333	24	0	3.67993	29.9373	25.1485	19.6581	25.2777
Tspan14	0.0741409	0.0208333	24	0	3.67749	17.2485	12.6121	11.1308	16.8959
Cdk4	0.0741409	0.0208333	24	9	3.67724	15.0883	21.7914	16.743	13.0453
H2-K2	0.0741409	0.0208333	24	21	3.67572	22.5622	11.6167	21.7732	25.2387
1110002B05Rik	0.0741409	0.0208333	24	0	3.67487	89.9746	86.5099	71.5707	89.4828
Sec11c	0.0741409	0.0208333	24	6	3.67349	69.0082	71.9778	68.5144	61.0073
Col6a2	0.0741409	0.0208333	24	21	3.66988	21.1414	15.6542	18.2439	23.1367
Eci1	0.0741409	0.0208333	24	9	3.66013	37.9795	56.4964	38.5759	35.1251
Ppp5c	0.0741409	0.0208333	24	9	3.65868	30.4636	34.5955	32.4493	26.2329
1810058I24Rik	0.0741409	0.0208333	24	6	3.65839	43.2503	46.7031	41.0745	38.5314
Sucla2	0.0741409	0.0208333	24	9	3.63976	87.2931	90.7247	87.5968	79.0654
Brd2	0.0741409	0.0208333	24	12	3.63082	32.9956	36.5993	40.1162	33.4504
Scd1	0.0741409	0.0208333	24	15	3.62891	5.26614	5.66325	10.8197	10.3738
Cttn	0.0741409	0.0208333	24	18	3.62887	136.119	133.444	139.431	140.396
Prr14	0.0741409	0.0208333	24	18	3.62279	38.5658	34.2001	40.401	42.6117
Nr1h3	0.0741409	0.0208333	24	6	3.6183	53.0048	57.5803	52.9668	47.3842
Cct3	0.0741409	0.0208333	24	9	3.61759	29.0819	33.2261	30.799	24.7111
Aqp3	0.0741409	0.0208333	24	0	3.61738	26.0749	22.6644	10.9426	24.0901
Ppp4c	0.0741409	0.0208333	24	6	3.60635	70.7198	73.0348	69.6347	60.5794
Nfu1	0.0741409	0.0208333	24	6	3.6061	19.8384	23.6711	18.5617	14.7482
Srf	0.0741409	0.0208333	24	9	3.60448	13.7619	19.7367	17.2843	13.0641
Alkbh6	0.0741409	0.0208333	24	6	3.60324	23.888	25.2083	21.7697	17.1351
Get4	0.0741409	0.0208333	24	6	3.59808	28.3838	31.4224	27.6235	22.0058
Insl6	0.0741409	0.0208333	24	0	3.59058	35.5389	31.6678	27.1442	33.4288
U2af1	0.0741409	0.0208333	24	9	3.58089	32.1824	35.5585	35.3602	28.4733
Trex1	0.0741409	0.0208333	24	12	3.57683	16.4887	21.3509	21.9876	16.733
Alyref	0.0741409	0.0208333	24	9	3.57071	14.5168	20.4021	18.689	14.4748
Ptpmt1	0.0741409	0.0208333	24	9	3.56491	28.7888	34.1807	33.2872	28.596
Eci2	0.0741409	0.0208333	24	6	3.56053	39.3897	39.4133	36.0564	32.4209
Ptbp1	0.0741409	0.0208333	24	6	3.55848	39.8495	46.1951	39.7273	36.2524
1810013D10Rik	0.0741409	0.0208333	24	3	3.55533	68.1665	59.4524	56.1004	57.8683
Ugt2b5	0.0741409	0.0208333	24	9	3.55333	10.3702	14.7068	11.4567	5.74297
Col4a1	0.0741409	0.0208333	24	0	3.55291	16.3645	12.7315	9.56045	15.9766
Cnksr1	0.0741409	0.0208333	24	18	3.55275	27.9925	26.9491	31.534	33.4563
Decr1	0.0741409	0.0208333	24	9	3.55219	26.7455	32.6651	27.9616	23.8341
Rhpn2	0.0741409	0.0208333	24	12	3.5518	27.2401	33.0473	37.1534	32.9146
Mtus1	0.0741409	0.0208333	24	15	3.54823	24.2991	25.0102	32.1646	27.6444
Pdxk	0.0741409	0.0208333	24	0	3.54013	15.5296	10.2545	10.1253	14.8632
Mapk1ip1l	0.0741409	0.0208333	24	15	3.53688	43.6573	44.3771	52.3139	46.9919
Rab5b	0.0741409	0.0208333	24	21	3.53472	37.3148	31.3017	35.2851	39.2697
Rnaseh2b	0.0741409	0.0208333	24	12	3.53118	3.54867	7.49788	11.2154	5.17693
Nt5c3	0.0741409	0.0208333	24	6	3.52249	16.8901	21.8338	16.5186	12.2422
Mafb	0.0741409	0.0208333	24	21	3.51895	13.6314	10.3137	11.7617	19.8388
Tuba1b	0.0741409	0.0208333	24	18	3.51213	17.2214	15.4278	18.7953	23.7877
Sdf2l1	0.0741409	0.0208333	24	6	3.50888	43.5583	46.2419	42.9131	36.9625
Cpt1a	0.0741409	0.0208333	24	6	3.50502	30.0218	33.2317	28.0888	25.251
Trmt112	0.0741409	0.0208333	24	9	3.50336	14.5675	19.6619	18.299	13.4844
Kif1c	0.0741409	0.0208333	24	0	3.50251	40.7714	34.1334	32.6041	35.9063
Daam1	0.0741409	0.0208333	24	15	3.49891	8.22729	11.6864	16.6982	13.1119
Psmb5	0.0741409	0.0208333	24	9	3.48077	88.8962	92.1779	92.0961	79.5513
Asap2	0.0741409	0.0208333	24	21	3.46951	9.56668	5.10848	6.06513	11.4202
Erlin2	0.0741409	0.0208333	24	3	3.46461	34.6218	33.4234	28.0875	30.1583
Snrpd1	0.0741409	0.0208333	24	9	3.44806	13.5223	18.6199	17.8248	13.1698
Hk2	0.0741409	0.0208333	24	12	3.44558	2.59861	6.85188	8.61976	3.12745
Gm7694	0.0741409	0.0208333	24	0	3.44379	16.6663	11.9097	11.1038	16.0877
Tfeb	0.0741409	0.0208333	24	15	3.44324	9.46925	11.4117	16.3393	14.2806
Ewsr1	0.0741409	0.0208333	24	6	3.43353	32.8768	36.2539	30.3089	29.1103
Cftr	0.0741409	0.0208333	24	6	3.43306	6.58982	14.6237	5.89619	3.3531
Ppm1b	0.0741409	0.0208333	24	6	3.43283	30.666	31.8481	27.5054	25.2992
Srsf6	0.0741409	0.0208333	24	9	3.43102	17.2275	22.8749	20.1268	16.0698
Bud31	0.0741409	0.0208333	24	9	3.42738	54.597	60.3586	56.7021	52.7696
Slc25a25	0.0741409	0.0208333	24	12	3.42593	6.36453	11.6406	13.1284	8.71449
Dpyd	0.0741409	0.0208333	24	6	3.423	48.0425	48.4168	44.4459	42.3317
Fnta	0.0741409	0.0208333	24	6	3.42197	31.1819	32.0529	26.894	26.662
Ensa	0.0741409	0.0208333	24	3	3.41932	74.7787	73.5148	68.6738	69.9484
Naa10	0.0741409	0.0208333	24	9	3.41738	17.3	21.5976	19.422	14.0538
Rab30	0.0741409	0.0208333	24	12	3.41383	5.21665	9.94111	11.3451	6.41379
Fam83f	0.0741409	0.0208333	24	0	3.40172	14.8714	9.44558	8.99799	13.1937
Slc30a1	0.0741409	0.0208333	24	18	3.38807	13.0172	7.61583	14.3017	16.2115
Rab40c	0.0741409	0.0208333	24	21	3.38711	15.419	10.2214	11.1583	15.5409
Tmem144	0.0741409	0.0208333	24	6	3.38358	16.0185	19.386	14.3988	11.4355
Atp6v1b2	0.0741409	0.0208333	24	6	3.3823	42.4184	45.182	40.8365	37.1973
2010107H07Rik	0.0741409	0.0208333	24	9	3.38188	22.1856	26.1894	23.4639	17.9023
Snora16a	0.0741409	0.0208333	24	0	3.38013	6.15217	2.54798	0	5.95625
Rab20	0.0741409	0.0208333	24	0	3.37898	25.2164	20.9164	19.4463	24.7035
Gstp2	0.0741409	0.0208333	24	9	3.37665	24.8893	28.3676	25.9179	19.8456
Cdcp1	0.0741409	0.0208333	24	21	3.37279	8.91969	4.73257	5.29103	10.6436
Rab19	0.0741409	0.0208333	24	21	3.37276	25.0768	21.2104	24.4091	30.0823
Atp6ap2	0.0741409	0.0208333	24	9	3.37046	26.4707	32.0081	27.9576	23.9619
Sbk1	0.0741409	0.0208333	24	21	3.37025	10.5153	4.75383	6.99407	10.7651
Crybb3	0.0741409	0.0208333	24	9	3.36478	6.65997	11.3552	10.2963	5.4745
2023-09-04	0.0741409	0.0208333	24	21	3.36333	12.181	8.18882	8.92114	14.4419
1700020I14Rik	0.0741409	0.0208333	24	0	3.35932	31.6276	24.5867	23.4602	26.6274
AI314976	0.0741409	0.0208333	24	0	3.3478	32.4279	26.2748	23.7816	27.0975
Tm9sf3	0.0741409	0.0208333	24	6	3.34267	26.4246	29.3008	24.2862	21.9847
Rnaset2a	0.0741409	0.0208333	24	12	3.34171	0.00203183	4.83441	5.0551	0.435699
Stard3	0.0741409	0.0208333	24	9	3.34129	29.6358	34.1765	34.0946	29.1847
Gna11	0.0741409	0.0208333	24	6	3.34108	277.679	311.923	275.538	274.529
Ripk3	0.0741409	0.0208333	24	9	3.34073	13.5012	19.0314	16.5669	12.6481
Ccz1	0.0741409	0.0208333	24	6	3.33942	34.8689	37.5526	33.0638	29.9124
Gm9926	0.0741409	0.0208333	24	3	3.3373	31.0344	28.1055	23.9498	25.7508
Ppp2r4	0.0741409	0.0208333	24	6	3.33595	41.4621	42.9197	39.6513	35.295
Magoh	0.0741409	0.0208333	24	9	3.33199	36.3983	40.1244	39.3141	33.6159
Dbnl	0.0741409	0.0208333	24	3	3.32146	58.3719	55.5049	49.8729	54.6094
Cdk5rap3	0.0741409	0.0208333	24	3	3.31325	36.9622	33.3698	30.0549	30.9058
Rbm45	0.0741409	0.0208333	24	0	3.30686	23.4821	20.2902	17.0572	23.2185
Eif3e	0.0741409	0.0208333	24	9	3.3065	41.101	44.2184	42.2304	33.5338
Itpa	0.0741409	0.0208333	24	3	3.30017	30.1674	29.898	24.9624	25.7687
Wdr61	0.0741409	0.0208333	24	6	3.29971	21.0176	22.0969	17.9195	15.862
Tprkb	0.0741409	0.0208333	24	6	3.29738	19.4766	23.0574	16.7186	16.3678
Coq4	0.0741409	0.0208333	24	21	3.29441	14.8136	10.5102	12.7725	17.7871
Marveld3	0.0741409	0.0208333	24	15	3.2925	35.7352	35.8177	50.556	38.8394
5133401N09Rik	0.0741409	0.0208333	24	0	3.28105	34.114	29.7498	26.0818	30.9978
Tbc1d14	0.0741409	0.0208333	24	0	3.28004	14.0833	9.20226	8.24349	12.6398
Pik3r2	0.0741409	0.0208333	24	0	3.27808	30.1249	25.0096	22.2113	26.3678
Hes2	0.0741409	0.0208333	24	21	3.27537	15.093	9.64356	12.5621	16.3768
Sparc	0.0741409	0.0208333	24	21	3.27362	36.166	33.0796	34.5663	46.7311
Lrp1	0.0741409	0.0208333	24	21	3.27313	20.3224	14.9482	17.554	21.4376
Slc1a5	0.0741409	0.0208333	24	12	3.2716	9.36962	13.6915	15.6783	10.7467
Abcf3	0.0741409	0.0208333	24	9	3.26959	17.3073	22.2492	18.5514	14.2455
BC017612	0.0741409	0.0208333	24	21	3.26655	19.2595	14.9411	16.3936	21.3144
Gpc4	0.0741409	0.0208333	24	0	3.26429	22.7141	17.1905	17.1353	20.8445
Aim1l	0.0741409	0.0208333	24	12	3.26047	17.6811	20.7551	26.2651	19.2166
Prlr	0.0741409	0.0208333	24	18	3.25884	22.189	18.4975	22.3251	27.5788
Psmd14	0.0741409	0.0208333	24	9	3.24965	29.3307	33.9891	31.774	27.241
Sbds	0.0741409	0.0208333	24	12	3.24689	97.9758	101.037	117.827	98.9238
D2Wsu81e	0.0741409	0.0208333	24	12	3.2418	11.5313	14.5877	22.4408	12.4342
Txndc11	0.0741409	0.0208333	24	12	3.23812	17.2534	21.2403	22.4835	17.3116
Ugt2b36	0.0741409	0.0208333	24	6	3.23718	8.11551	13.6253	7.71892	4.86576
C2cd2l	0.0741409	0.0208333	24	12	3.23671	32.73	37.8135	39.0352	34.9639
Eif4g1	0.0741409	0.0208333	24	6	3.22844	37.1549	41.4848	36.6706	32.8377
Rabl5	0.0741409	0.0208333	24	18	3.2278	16.4399	14.1056	19.6843	19.9908
Col6a1	0.0741409	0.0208333	24	21	3.22561	27.2156	22.0624	24.8595	28.8297
Ddx1	0.0741409	0.0208333	24	0	3.22547	35.2448	28.9753	27.0705	30.1115
Khdrbs1	0.0741409	0.0208333	24	6	3.21076	12.9444	18.0914	12.7854	9.16899
Golm1	0.0741409	0.0208333	24	3	3.20797	71.0902	65.8946	62.8701	63.7704
Stat3	0.0741409	0.0208333	24	21	3.20712	35.835	32.8113	33.7984	40.5142
Pafah1b1	0.0741409	0.0208333	24	12	3.20606	33.698	37.1687	40.5518	34.9544
Csk	0.0741409	0.0208333	24	21	3.18718	38.8255	33.5654	37.9681	41.7227
Gns	0.0741409	0.0208333	24	12	3.18495	24.9151	27.9179	33.448	27.1692
2810428I15Rik	0.0741409	0.0208333	24	6	3.18484	46.0742	46.8138	43.6956	40.1843
Apool	0.0741409	0.0208333	24	9	3.18071	20.2484	26.086	23.2903	20.1315
2010308F09Rik	0.0741409	0.0208333	24	21	3.17988	5.93566	2.14013	2.86891	8.06743
Ehbp1l1	0.0741409	0.0208333	24	18	3.17498	26.1527	20.2888	28.6518	29.1461
Bgn	0.0741409	0.0208333	24	21	3.17466	35.8907	32.8976	35.0029	44.5643
Nmt1	0.0741409	0.0208333	24	6	3.17381	60.6185	66.5217	59.8576	57.6262
Mapk14	0.0741409	0.0208333	24	21	3.17091	18.9242	13.2184	18.0539	21.3168
2610019E17Rik	0.0741409	0.0208333	24	15	3.16855	13.0835	14.8773	19.0763	17.8465
Dnaja2	0.0741409	0.0208333	24	12	3.16522	35.7059	39.5897	41.6738	36.605
Spag7	0.0741409	0.0208333	24	15	3.15539	31.0211	32.1385	36.659	35.4254
Arhgap17	0.0741409	0.0208333	24	18	3.15518	19.7286	17.6515	22.7683	23.536
Med27	0.0741409	0.0208333	24	9	3.14801	9.76855	14.5706	12.757	8.65513
Tmed9	0.0741409	0.0208333	24	15	3.14429	22.3735	24.3029	29.7028	25.867
Rhot2	0.0741409	0.0208333	24	0	3.14249	24.5416	19.4474	18.9795	22.7736
Bet1	0.0741409	0.0208333	24	0	3.13627	20.8483	17.7557	14.2558	20.0339
Slc35b2	0.0741409	0.0208333	24	6	3.12997	18.1153	18.8905	15.0861	13.0668
D17Wsu104e	0.0741409	0.0208333	24	9	3.12651	92.2911	97.1537	92.7345	88.754
Alg5	0.0741409	0.0208333	24	9	3.11696	25.4212	28.3599	26.8064	18.5396
Commd3	0.0741409	0.0208333	24	3	3.10911	51.6019	45.5295	42.5982	44.1995
Acot9	0.0741409	0.0208333	24	12	3.10455	24.2751	27.2021	38.3847	27.0664
2310039H08Rik	0.0741409	0.0208333	24	9	3.10045	15.4028	20.343	17.6216	13.7924
Arrdc2	0.0741409	0.0208333	24	18	3.09177	10.3095	6.52925	12.3577	13.2259
Usf1	0.0741409	0.0208333	24	0	3.08436	22.6037	17.8098	16.2291	20.1591
Snhg6	0.0741409	0.0208333	24	9	3.08281	16.0053	18.9118	18.6705	12.0274
Adh5	0.0741409	0.0208333	24	9	3.07065	29.7325	33.267	31.7058	26.5552
Slc26a2	0.0741409	0.0208333	24	15	3.06754	15.6978	18.2673	25.3308	18.5899
Apoo	0.0741409	0.0208333	24	9	3.06697	15.7948	19.6374	17.1903	12.3582
Chmp4c	0.0741409	0.0208333	24	15	3.06389	30.0486	31.3099	36.3051	33.7194
Supt4h1	0.0741409	0.0208333	24	3	3.05845	52.7085	49.0226	45.8136	47.2669
Flot1	0.0741409	0.0208333	24	6	3.05813	33.3899	37.1269	33.1404	28.7267
Wwp2	0.0741409	0.0208333	24	0	3.05795	28.8285	23.8766	23.3026	26.9999
Ehhadh	0.0741409	0.0208333	24	0	3.05597	35.6757	32.7945	24.2063	35.0149
Hdac3	0.0741409	0.0208333	24	9	3.05371	25.7737	30.5949	26.9714	23.1554
Dcaf11	0.0741409	0.0208333	24	0	3.05297	81.2177	76.1312	75.5918	79.1404
Plekhh3	0.0741409	0.0208333	24	12	3.0489	12.7948	16.4443	19.5298	14.5557
H1f0	0.0741409	0.0208333	24	9	3.04523	53.807	58.1418	56.0246	51.7462
Sirt7	0.0741409	0.0208333	24	0	3.04233	67.1643	62.1892	61.3204	64.9503
Atp6v0a1	0.0741409	0.0208333	24	18	3.03331	21.161	18.014	22.9602	24.7943
Mesdc1	0.0741409	0.0208333	24	18	3.02939	23.647	22.5051	27.0781	27.6424
D10Wsu52e	0.0741409	0.0208333	24	6	3.02797	50.7046	51.4104	48.0468	45.5038
Serp1	0.0741409	0.0208333	24	9	3.02285	54.6881	59.3022	55.0947	51.1589
Adck3	0.0741409	0.0208333	24	0	3.01575	10.8963	3.97992	3.29381	6.13709
Ccdc93	0.0741409	0.0208333	24	21	3.01574	11.463	7.50463	9.42527	13.9967
Zdhhc18	0.0741409	0.0208333	24	18	3.01005	10.8076	6.42533	13.4827	13.6455
2023-03-06	0.0741409	0.0208333	24	3	3.0098	25.7884	25.5977	20.0443	22.8288
Snrpf	0.0741409	0.0208333	24	9	3.00934	14.016	17.8919	17.5972	12.9614
Ptges2	0.0741409	0.0208333	24	9	3.00793	13.6596	16.9315	14.9154	9.67959
Tmem80	0.0741409	0.0208333	24	21	3.00549	18.8581	13.9842	17.6108	21.2377
Dnajc15	0.0741409	0.0208333	24	9	3.00527	17.9633	21.5386	20.7959	15.871
Tmem205	0.0741409	0.0208333	24	6	3.00347	61.9882	65.0835	61.3284	57.2482
Pja1	0.0741409	0.0208333	24	21	3.00276	45.1733	41.4682	42.4612	47.2492
4933407C03Rik	0.0741409	0.0208333	24	18	3.00107	26.7562	22.3525	27.4636	30.1334
Ell2	0.0741409	0.0208333	24	12	2.99888	16.3111	20.2929	22.5209	18.0206
Efnb1	0.0741409	0.0208333	24	18	2.99615	42.4663	40.0198	43.7493	47.2112
Snora17	0.0741409	0.0208333	24	0	2.99403	17.1499	14.2139	11.0812	16.6136
Ganab	0.0741409	0.0208333	24	9	2.99046	42.7837	47.8257	44.5571	41.1408
Pycard	0.0741409	0.0208333	24	6	2.98427	35.0095	47.5744	33.802	32.1959
B230206H07Rik	0.0741409	0.0208333	24	21	2.98268	28.9955	20.5357	28.3026	31.1147
Hnrnpa3	0.0741409	0.0208333	24	9	2.97543	15.101	19.1376	18.1963	13.8171
Ndufs1	0.0741409	0.0208333	24	9	2.97388	25.4209	30.7362	26.0666	22.9705
Vps25	0.0741409	0.0208333	24	9	2.97186	70.6502	76.6228	71.541	68.7391
Gstt3	0.0741409	0.0208333	24	3	2.97116	32.215	28.8234	24.412	28.2227
Tuba1c	0.0741409	0.0208333	24	15	2.9707	25.2704	35.4272	38.228	36.4741
Slc30a4	0.0741409	0.0208333	24	6	2.9685	24.5269	25.6763	21.4424	20.3646
Foxo6	0.0741409	0.0208333	24	18	2.96426	4.17604	4.0611	7.28996	9.33136
Cpped1	0.0741409	0.0208333	24	9	2.95868	25.3597	30.7602	26.228	23.2601
Plekhh1	0.0741409	0.0208333	24	12	2.95602	5.31264	8.35946	12.1757	6.86162
Imp3	0.0741409	0.0208333	24	6	2.94917	30.0022	30.6577	27.8772	23.4221
Aig1	0.0741409	0.0208333	24	6	2.9439	17.3362	19.1976	14.4109	13.7963
Cebpg	0.0741409	0.0208333	24	18	2.94344	21.7478	16.8926	22.8911	24.5229
Comt	0.0741409	0.0208333	24	6	2.9375	55.3795	72.0685	53.8412	52.61
Atg13	0.0741409	0.0208333	24	3	2.93485	21.6134	17.9091	14.2413	16.9802
Cct5	0.0741409	0.0208333	24	9	2.92763	50.4333	53.1935	52.0024	44.4866
Lsmd1	0.0741409	0.0208333	24	6	2.92742	50.2106	51.3251	48.5651	40.8105
BC089597	0.0741409	0.0208333	24	3	2.92717	11.2236	7.51414	4.42948	6.02897
Nfe2l1	0.0741409	0.0208333	24	21	2.92569	31.0058	26.7357	30.4717	34.4767
Orai1	0.0741409	0.0208333	24	0	2.92343	21.954	17.6967	16.0086	20.02
Wwc1	0.0741409	0.0208333	24	15	2.91883	27.0587	28.8985	33.5193	30.6936
Tmem63b	0.0741409	0.0208333	24	9	2.91795	15.31	18.436	18.3922	13.265
Sumo2	0.0741409	0.0208333	24	15	2.91777	67.3251	69.5138	80.1622	70.076
Fabp4	0.0741409	0.0208333	24	15	2.91218	20.2485	23.569	27.5898	24.4646
Nudt1	0.0741409	0.0208333	24	3	2.91169	15.6897	13.2089	8.86579	11.7973
Rab43	0.0741409	0.0208333	24	18	2.91088	16.3324	14.5444	17.3319	21.7781
Prodh	0.0741409	0.0208333	24	12	2.90525	16.7308	19.4699	30.5684	18.964
Tuft1	0.0741409	0.0208333	24	18	2.90377	35.5364	34.218	38.2732	39.6943
Lnx1	0.0741409	0.0208333	24	9	2.90085	10.8366	15.3377	13.0754	9.37166
BC046404	0.0741409	0.0208333	24	12	2.89843	54.1101	58.2705	60.0144	55.9768
Mtap7d1	0.0741409	0.0208333	24	18	2.89842	11.37	9.65183	14.1425	15.0773
Fasn	0.0741409	0.0208333	24	15	2.8961	3.46895	4.23872	8.61563	7.28346
Tbc1d15	0.0741409	0.0208333	24	9	2.89528	16.6793	21.4801	17.1345	13.7462
Ppme1	0.0741409	0.0208333	24	12	2.89373	17.5369	21.4021	22.3518	18.0323
Ctdspl	0.0741409	0.0208333	24	6	2.89249	24.9371	25.1812	22.1486	19.7885
Anapc16	0.0741409	0.0208333	24	3	2.89097	30.8572	28.8035	25.5701	25.9137
Ralbp1	0.0741409	0.0208333	24	21	2.88174	17.485	13.3161	14.0491	18.031
Psmd12	0.0741409	0.0208333	24	9	2.87616	20.7077	25.2936	23.2874	19.7383
Ly6a	0.0741409	0.0208333	24	9	2.87188	40.1548	44.6576	43.0955	39.4754
Fus	0.0741409	0.0208333	24	3	2.86527	32.236	30.1298	26.6746	27.587
Adrm1	0.0741409	0.0208333	24	9	2.85774	53.6177	60.9195	55.4286	52.7343
Dom3z	0.0741409	0.0208333	24	3	2.85752	29.971	26.3269	22.7119	25.5037
Parl	0.0741409	0.0208333	24	6	2.85169	25.8579	26.6798	23.9912	20.1953
Zfp36l1	0.0741409	0.0208333	24	18	2.84667	16.4703	12.5723	17.124	19.9702
Vps26a	0.0741409	0.0208333	24	6	2.84384	27.4038	31.4182	26.9711	23.8073
Kcnq1	0.0741409	0.0208333	24	9	2.84315	4.88039	8.98386	8.13366	4.1955
6820431F20Rik	0.0741409	0.0208333	24	0	2.83408	39.9917	37.3197	31.6988	37.6863
Ezh1	0.0741409	0.0208333	24	21	2.83366	13.876	10.3052	10.7107	15.1547
Slc38a2	0.0741409	0.0208333	24	12	2.83249	12.5465	17.2136	17.2884	13.944
Ptrh1	0.0741409	0.0208333	24	15	2.82931	13.9914	15.4272	25.2818	16.6589
Pfdn2	0.0741409	0.0208333	24	9	2.8291	20.6705	24.7268	24.5516	20.606
Ghitm	0.0741409	0.0208333	24	18	2.82666	100.668	100.36	103.025	106.137
Lsm1	0.0741409	0.0208333	24	6	2.82266	20.0362	20.2781	16.5604	15.7702
Rmrp	0.0741409	0.0208333	24	15	2.80672	17.3356	19.0245	23.1743	21.1244
Nhp2l1	0.0741409	0.0208333	24	9	2.80569	25.7892	29.9789	27.8767	24.1307
Trabd	0.0741409	0.0208333	24	6	2.8047	35.8132	38.1712	33.5163	32.5352
Cyba	0.0741409	0.0208333	24	6	2.79958	41.6098	42.5614	39.4506	36.8022
Micalcl	0.0741409	0.0208333	24	15	2.79473	8.37761	10.9749	14.4397	12.8175
Mov10	0.0741409	0.0208333	24	3	2.79279	21.7472	21.4338	17.3494	17.9324
Mcrs1	0.0741409	0.0208333	24	6	2.78763	40.9707	41.8094	38.8315	36.064
A830007P12Rik	0.0741409	0.0208333	24	0	2.78495	13.6096	9.30125	7.98313	11.5518
Blvra	0.0741409	0.0208333	24	9	2.78027	24.0313	28.9504	24.5258	21.5811
Rap2c	0.0741409	0.0208333	24	21	2.77621	20.599	17.3717	18.9573	23.5823
Slc11a2	0.0741409	0.0208333	24	0	2.77532	19.4428	13.7546	13.387	16.0036
Nono	0.0741409	0.0208333	24	6	2.76967	40.9812	44.3378	39.6059	37.8793
Cd47	0.0741409	0.0208333	24	0	2.7661	34.4084	31.8005	27.3545	32.8565
Rbks	0.0741409	0.0208333	24	9	2.75779	20.1347	23.2407	22.3186	17.6244
Zc3h7a	0.0741409	0.0208333	24	18	2.75552	32.5	30.2168	34.5408	35.9698
Stard3nl	0.0741409	0.0208333	24	21	2.75259	36.2359	31.2294	34.9728	37.7518
Bag3	0.0741409	0.0208333	24	15	2.75064	8.37587	9.22618	14.8638	10.9692
Uaca	0.0741409	0.0208333	24	21	2.74159	25.0087	18.7016	23.7748	26.3596
Prkag1	0.0741409	0.0208333	24	6	2.73937	44.2225	44.9511	42.3684	36.6621
Tex261	0.0741409	0.0208333	24	21	2.73809	44.1422	40.0037	41.8583	45.4643
Rnaset2b	0.0741409	0.0208333	24	0	2.73466	5.17744	1.01501	0.887224	4.45958
Pigx	0.0741409	0.0208333	24	6	2.73406	33.0939	34.5974	32.0197	22.7206
Ppp6r1	0.0741409	0.0208333	24	0	2.7323	50.7164	46.2258	45.5139	48.7514
Shc1	0.0741409	0.0208333	24	12	2.73177	23.6964	28.1027	28.1801	24.8598
Spr	0.0741409	0.0208333	24	6	2.72643	60.4423	61.8664	59.2959	47.6224
Tbc1d13	0.0741409	0.0208333	24	0	2.72165	28.7614	24.4632	21.8015	25.2013
Zfp710	0.0741409	0.0208333	24	21	2.72134	13.8127	10.0064	11.7485	15.6393
Bnip3	0.0741409	0.0208333	24	12	2.7155	9.78501	12.6101	15.2427	10.3872
Lrrc41	0.0741409	0.0208333	24	6	2.712	24.7847	29.0453	24.7377	21.4216
Hmga1-rs1	0.0741409	0.0208333	24	9	2.70721	9.75331	13.5351	12.2618	8.38644
Tec	0.0741409	0.0208333	24	21	2.70045	14.2479	9.64016	12.6557	15.686
Fbl	0.0741409	0.0208333	24	9	2.69973	13.046	15.7024	15.4308	10.4512
1110017F19Rik	0.0741409	0.0208333	24	21	2.69627	38.4864	33.9505	36.3623	39.4526
Caprin1	0.0741409	0.0208333	24	0	2.69613	25.437	21.7749	20.2173	24.181
Dohh	0.0741409	0.0208333	24	6	2.69323	18.0964	20.774	17.5054	13.7474
Ydjc	0.0741409	0.0208333	24	6	2.69097	18.5767	18.616	15.6773	13.9042
Ihh	0.0741409	0.0208333	24	21	2.6904	43.4384	38.8841	42.6306	45.6859
Rab11fip1	0.0741409	0.0208333	24	21	2.68785	24.4821	19.6916	23.7601	26.572
Slc6a4	0.0741409	0.0208333	24	6	2.68209	22.5644	38.0325	21.8082	20.0357
Dctn6	0.0741409	0.0208333	24	9	2.67689	65.6359	68.1597	65.9446	54.9253
Ptp4a2	0.0741409	0.0208333	24	6	2.67615	63.6178	64.1077	61.5846	53.1552
Akr1e1	0.0741409	0.0208333	24	6	2.67435	29.4424	32.454	29.2979	25.0343
Sipa1l3	0.0741409	0.0208333	24	21	2.67435	16.7733	13.6957	13.9797	18.4663
Tufm	0.0741409	0.0208333	24	9	2.67417	32.3425	35.1103	34.2625	29.4666
Snx4	0.0741409	0.0208333	24	6	2.67339	29.8706	33.0505	29.4874	25.8722
F3	0.0741409	0.0208333	24	12	2.67005	1.72296	4.83873	7.24421	2.80794
Tceb1	0.0741409	0.0208333	24	9	2.66731	37.2103	41.5311	38.835	35.6115
Acat1	0.0741409	0.0208333	24	9	2.65837	11.3356	16.2276	13.8339	11.2069
Gpd1l	0.0741409	0.0208333	24	0	2.65664	17.0044	14.4997	9.58465	15.8262
Lsm4	0.0741409	0.0208333	24	15	2.64486	32.3126	35.1322	38.718	36.2076
Fam78a	0.0741409	0.0208333	24	21	2.64255	11.7384	7.67826	9.75667	13.1708
Bre	0.0741409	0.0208333	24	15	2.64168	21.9935	22.7952	29.9655	24.4841
Pitx2	0.0741409	0.0208333	24	9	2.64001	6.02245	9.97221	8.0624	4.54509
C1galt1c1	0.0741409	0.0208333	24	9	2.63977	20.6351	24.6698	21.6466	18.2149
Tram1	0.0741409	0.0208333	24	6	2.62662	34.582	39.1498	34.4264	31.8762
Pdss1	0.0741409	0.0208333	24	9	2.6229	8.09949	11.7821	10.5443	6.80823
Strap	0.0741409	0.0208333	24	9	2.61718	31.4526	33.9201	33.8097	28.0259
Trak1	0.0741409	0.0208333	24	21	2.61697	28.1595	22.1818	26.38	28.8473
Ksr1	0.0741409	0.0208333	24	18	2.61688	9.46862	7.24631	9.71353	14.5157
Galnt7	0.0741409	0.0208333	24	0	2.61562	13.3418	9.02944	6.08054	9.16627
Diap1	0.0741409	0.0208333	24	21	2.61509	20.037	15.6592	17.9442	20.963
Ddhd2	0.0741409	0.0208333	24	0	2.6117	15.25	12.2477	10.6396	15.0243
Gmfb	0.0741409	0.0208333	24	9	2.6105	15.4328	18.8996	16.5286	12.6118
Hexim1	0.0741409	0.0208333	24	0	2.6083	22.6385	18.9789	18.8187	22.5365
Cyp4f40	0.0741409	0.0208333	24	12	2.60799	37.9496	40.7817	43.3158	38.7714
Tmem184b	0.0741409	0.0208333	24	18	2.60707	12.2232	10.7977	14.0848	16.31
Cops3	0.0741409	0.0208333	24	9	2.60632	22.8715	26.8708	23.5465	20.174
Slc26a3	0.0741409	0.0208333	24	9	2.59699	30.1574	34.6599	32.2142	29.3713
Stt3b	0.0741409	0.0208333	24	6	2.59505	39.0848	41.8697	38.3703	35.2443
Uxt	0.0741409	0.0208333	24	9	2.59278	24.6554	27.5506	25.6366	21.1983
Proz	0.0741409	0.0208333	24	0	2.59271	10.3911	7.94667	4.74744	10.1565
2900026A02Rik	0.0741409	0.0208333	24	21	2.59073	45.207	42.6563	43.169	47.946
6330578E17Rik	0.0741409	0.0208333	24	3	2.58723	17.7823	17.5312	13.8707	14.125
Cav1	0.0741409	0.0208333	24	21	2.58206	10.0769	7.50052	8.29382	13.0206
Mtap4	0.0741409	0.0208333	24	21	2.58197	26.5342	21.14	26.04	28.4743
Capn10	0.0741409	0.0208333	24	0	2.57814	13.2739	8.95555	8.76176	11.7355
Zswim7	0.0741409	0.0208333	24	6	2.57663	17.6701	20.3267	16.9946	13.7144
AI507597	0.0741409	0.0208333	24	6	2.57578	18.9675	22.3484	18.8852	15.1453
Mtx2	0.0741409	0.0208333	24	9	2.57284	17.9414	20.9851	20.4033	16.1699
Zfp703	0.0741409	0.0208333	24	6	2.57231	22.1178	33.1182	20.0643	19.6926
Lsm7	0.0741409	0.0208333	24	6	2.56927	18.1512	20.3555	17.6324	13.6073
2310030G06Rik	0.0741409	0.0208333	24	0	2.5675	24.7856	20.6696	19.627	22.773
Leo1	0.0741409	0.0208333	24	21	2.56494	6.06391	2.2019	3.26973	6.66247
Rragc	0.0741409	0.0208333	24	9	2.55824	22.2373	25.3196	23.5386	19.3851
Camta2	0.0741409	0.0208333	24	21	2.55478	18.9284	15.2814	15.9387	19.5177
Rwdd2b	0.0741409	0.0208333	24	0	2.55449	31.8682	28.3837	25.5413	29.282
Arcn1	0.0741409	0.0208333	24	6	2.55131	69.0011	79.139	68.335	66.5957
Nosip	0.0741409	0.0208333	24	3	2.55007	20.6627	19.2053	15.9123	16.743
Hyou1	0.0741409	0.0208333	24	9	2.54417	19.4655	24.1137	21.5035	18.9557
Tmem85	0.0741409	0.0208333	24	9	2.53933	39.412	41.8061	41.3063	34.8043
Nomo1	0.0741409	0.0208333	24	9	2.53766	21.3818	24.4175	22.0318	17.8899
Pip4k2c	0.0741409	0.0208333	24	6	2.5353	35.618	35.925	33.1522	31.2199
Ndrg3	0.0741409	0.0208333	24	6	2.53515	23.9616	26.6329	21.978	21.446
Rhog	0.0741409	0.0208333	24	0	2.53424	63.6677	61.2417	56.7322	61.4741
Slc25a36	0.0741409	0.0208333	24	3	2.52961	11.7981	8.23977	4.66351	8.21953
Acsl3	0.0741409	0.0208333	24	15	2.52843	5.84505	6.79483	16.8289	8.22888
Gm10052	0.0741409	0.0208333	24	6	2.52405	17.2462	18.4243	15.9615	12.5699
Casp4	0.0741409	0.0208333	24	0	2.52225	28.4788	20.6837	19.5801	21.9581
Bbc3	0.0741409	0.0208333	24	0	2.52179	6.04802	2.2776	2.2369	5.59918
Ormdl1	0.0741409	0.0208333	24	6	2.51375	9.01062	10.7426	6.37192	6.27134
Mbtps1	0.0741409	0.0208333	24	0	2.51292	15.9597	11.89	11.8347	14.8726
Lmtk2	0.0741409	0.0208333	24	21	2.50447	15.614	11.5058	13.5546	16.5301
Tspan5	0.0741409	0.0208333	24	9	2.50379	35.2831	38.7328	35.4903	31.8582
Adamtsl5	0.0741409	0.0208333	24	21	2.50316	36.0683	28.2847	33.81	36.17
Mfsd1	0.0741409	0.0208333	24	6	2.48757	15.251	16.3916	13.2104	11.3963
Mad2l1bp	0.0741409	0.0208333	24	15	2.48643	29.6332	32.8033	35.273	34.1962
Cox15	0.0741409	0.0208333	24	12	2.48519	8.49332	13.0444	13.1314	10.6533
Copb1	0.0741409	0.0208333	24	9	2.48279	31.6908	37.0752	32.2368	29.896
B4galnt4	0.0741409	0.0208333	24	6	2.47862	3.71148	7.53989	1.95258	1.37461
Nagk	0.0741409	0.0208333	24	6	2.47555	25.4339	27.318	22.9298	22.8202
Nek3	0.0741409	0.0208333	24	21	2.47516	13.0179	10.5155	10.5471	15.0455
Polr2h	0.0741409	0.0208333	24	6	2.47349	16.6517	20.7317	16.3564	14.0309
Tnc	0.0741409	0.0208333	24	21	2.4722	10.4446	8.03107	9.53839	14.1173
Rars	0.0741409	0.0208333	24	9	2.46331	33.2999	36.8758	34.7921	31.4007
Pax8	0.0741409	0.0208333	24	18	2.46259	7.85949	5.93926	9.922	10.842
Tmem214	0.0741409	0.0208333	24	9	2.46041	27.8306	30.8671	28.1883	24.2657
Ldb3	0.0741409	0.0208333	24	18	2.45829	22.7826	22.1472	24.4649	28.847
Hectd3	0.0741409	0.0208333	24	6	2.45808	42.8636	45.4799	41.9112	39.4798
Beta-s	0.0741409	0.0208333	24	21	2.45755	13.5256	11.2086	12.6444	21.3269
Tmc6	0.0741409	0.0208333	24	12	2.45292	14.1014	17.1245	18.0302	14.1154
Tpra1	0.0741409	0.0208333	24	6	2.44995	29.7111	32.1216	27.6478	27.2554
Rap1b	0.0741409	0.0208333	24	9	2.44754	27.5421	30.5151	30.2876	26.3379
Ric8	0.0741409	0.0208333	24	3	2.4439	29.2048	27.3777	24.6541	25.016
Cox6b2	0.0741409	0.0208333	24	18	2.44249	26.5305	13.1844	27.0146	28.8333
Trim16	0.0741409	0.0208333	24	0	2.44132	21.7781	18.6021	15.3909	19.12
Il1rl1	0.0741409	0.0208333	24	15	2.43989	8.57026	10.2216	13.6263	12.0666
Bcl2l14	0.0741409	0.0208333	24	6	2.43236	10.6332	13.2913	9.01353	8.03123
Pdgfrb	0.0741409	0.0208333	24	0	2.43192	8.73993	5.23567	4.44788	7.82212
Top1	0.0741409	0.0208333	24	15	2.42605	13.3082	13.741	17.0291	16.882
Ube2e3	0.0741409	0.0208333	24	6	2.41958	22.402	23.8095	21.4233	17.9446
Bdh1	0.0741409	0.0208333	24	9	2.41799	20.7605	24.4395	21.5421	18.382
Galnt1	0.0741409	0.0208333	24	3	2.41382	59.734	56.442	53.8158	55.5329
Bst2	0.0741409	0.0208333	24	6	2.41364	16.0033	19.5524	14.4735	13.7277
Spats2l	0.0741409	0.0208333	24	18	2.41317	8.02734	6.66523	8.94039	12.9729
Lhpp	0.0741409	0.0208333	24	9	2.41257	8.03102	12.044	10.2282	7.41741
Akt1	0.0741409	0.0208333	24	9	2.41229	17.3597	19.8323	19.7126	15.3622
Dusp1	0.0741409	0.0208333	24	15	2.41082	6.28557	6.35585	10.6807	8.77955
Edem1	0.0741409	0.0208333	24	21	2.41024	34.2789	29.7196	33.8754	36.1478
Ankrd9	0.0741409	0.0208333	24	12	2.40745	11.9181	14.2099	17.9928	13.4753
D17H6S53E	0.0741409	0.0208333	24	0	2.40427	16.6813	13.1028	12.2082	15.43
AI661453	0.0741409	0.0208333	24	21	2.40336	10.0975	7.25267	8.8063	12.7592
Fam53b	0.0741409	0.0208333	24	21	2.40109	9.0158	4.53585	7.32777	9.63913
Crip2	0.0741409	0.0208333	24	18	2.39978	12.0135	10.4903	12.8533	16.4381
Apba3	0.0741409	0.0208333	24	15	2.39815	24.6356	26.6064	35.3211	26.8966
Zfp385c	0.0741409	0.0208333	24	0	2.39136	21.1918	17.5126	16.7877	19.8723
Timm9	0.0741409	0.0208333	24	9	2.38981	6.80927	10.1127	9.08439	5.62842
Golga4	0.0741409	0.0208333	24	21	2.38974	23.0918	19.5761	20.3662	23.6097
Ypel5	0.0741409	0.0208333	24	12	2.3885	27.1205	29.3724	33.1839	27.8722
Rnf31	0.0741409	0.0208333	24	21	2.38702	12.6061	9.9161	11.3571	15.4186
Bc1	0.0741409	0.0208333	24	0	2.38654	6.96104	1.95063	0	2.25005
Atp6v1c1	0.0741409	0.0208333	24	9	2.38574	15.1996	18.6689	16.5744	13.2958
Srsf9	0.0741409	0.0208333	24	6	2.38086	22.0681	22.3547	19.8086	17.8801
Ubl4	0.0741409	0.0208333	24	9	2.37924	15.1489	19.2982	16.8156	14.2354
Tnfrsf12a	0.0741409	0.0208333	24	12	2.37905	6.8011	9.1774	13.4151	9.06242
Dctn1	0.0741409	0.0208333	24	18	2.37761	32.5065	30.3626	33.6171	35.9769
Rabggtb	0.0741409	0.0208333	24	9	2.37627	12.2479	16.4657	13.3631	10.8598
BC006779	0.0741409	0.0208333	24	21	2.37312	10.6603	7.26866	8.64103	11.9616
Slc16a3	0.0741409	0.0208333	24	18	2.3712	9.94083	7.31099	11.4274	12.5312
Cdc42bpb	0.0741409	0.0208333	24	18	2.36686	22.8575	19.0296	23.4817	25.0999
2210407C18Rik	0.0741409	0.0208333	24	21	2.3668	9.23943	7.00799	7.61241	14.318
Nop56	0.0741409	0.0208333	24	12	2.36621	4.93367	8.41474	8.89537	5.68379
Atp10b	0.0741409	0.0208333	24	15	2.36562	8.13827	8.80554	13.194	10.4408
Sema6d	0.0741409	0.0208333	24	21	2.36032	5.22262	2.12298	3.15184	6.7282
Pipox	0.0741409	0.0208333	24	9	2.35755	9.30599	16.3996	10.3329	8.11018
Per1	0.0741409	0.0208333	24	12	2.35731	0.872318	3.09481	6.01248	1.4469
Gm239	0.0741409	0.0208333	24	12	2.3553	25.9318	32.5089	34.2338	32.0132
Chordc1	0.0741409	0.0208333	24	15	2.35295	7.81002	8.65573	13.3386	10.0284
Sorbs1	0.0741409	0.0208333	24	21	2.35247	14.3467	11.3027	13.9499	17.5597
Cir1	0.0741409	0.0208333	24	0	2.34938	12.9334	8.58685	7.76339	10.0619
As3mt	0.0741409	0.0208333	24	9	2.34671	14.4195	23.7095	16.3263	14.1138
Mid1ip1	0.0741409	0.0208333	24	15	2.34515	10.6245	12.693	15.882	14.0686
Cmc1	0.0741409	0.0208333	24	6	2.34151	17.5022	18.8188	16.6112	12.8629
Pcdh1	0.0741409	0.0208333	24	3	2.34134	17.2159	16.7573	12.5219	14.829
Sbno2	0.0741409	0.0208333	24	21	2.34017	18.6728	16.0218	18.4299	22.3979
Ccdc85c	0.0741409	0.0208333	24	21	2.33652	6.5022	2.97611	4.27017	7.35275
Anapc2	0.0741409	0.0208333	24	21	2.33575	31.8332	28.6904	30.9837	34.4474
Fam69b	0.0741409	0.0208333	24	0	2.33572	8.23866	4.06131	3.33285	5.76192
Pdzk1ip1	0.0741409	0.0208333	24	15	2.3349	5.28709	5.70676	9.81697	7.78097
Pmaip1	0.0741409	0.0208333	24	15	2.33052	19.5906	21.2964	24.2236	23.2551
Mocos	0.0741409	0.0208333	24	18	2.329	17.9706	17.5885	19.7843	23.0873
Tbc1d10a	0.0741409	0.0208333	24	9	2.32532	10.1546	14.6346	10.4728	8.28047
2810422J05Rik	0.0741409	0.0208333	24	6	2.32274	43.5144	43.9339	41.744	34.8827
Bcr	0.0741409	0.0208333	24	12	2.32087	12.9643	16.2114	18.0804	14.7631
Nfkb1	0.0741409	0.0208333	24	15	2.31676	15.7301	16.7192	20.8869	18.1152
Srp14	0.0741409	0.0208333	24	9	2.31086	56.0206	60.4574	56.6197	54.441
Tjp2	0.0741409	0.0208333	24	21	2.30665	28.7571	25.7426	28.3602	31.8699
Eif3b	0.0741409	0.0208333	24	6	2.30474	28.4641	29.4051	26.9991	24.3513
Shisa5	0.0741409	0.0208333	24	21	2.30291	82.6445	79.896	81.6731	85.4382
Slc9a3r2	0.0741409	0.0208333	24	18	2.30189	11.0348	9.60676	12.5872	14.5651
Acly	0.0741409	0.0208333	24	18	2.29753	10.9793	10.5858	13.1809	14.8826
Tmem128	0.0741409	0.0208333	24	12	2.28307	28.6456	32.1256	33.1423	30.1648
Surf1	0.0741409	0.0208333	24	3	2.2819	29.3908	29.1018	25.3855	26.6529
Isoc2b	0.0741409	0.0208333	24	21	2.28116	13.6386	11.0155	11.7702	15.5992
Nudt9	0.0741409	0.0208333	24	15	2.27915	32.7594	33.302	45.4482	34.9082
Mecr	0.0741409	0.0208333	24	9	2.27054	5.95714	9.61148	8.49222	5.7245
Tmem165	0.0741409	0.0208333	24	9	2.26964	22.8967	26.7299	24.5751	21.9888
Ccdc28a	0.0741409	0.0208333	24	0	2.26875	22.7665	16.6708	16.265	18.404
Aifm1	0.0741409	0.0208333	24	9	2.26759	21.2132	24.4758	22.7642	19.6131
Bambi-ps1	0.0741409	0.0208333	24	18	2.26627	11.0716	8.09123	11.584	13.9888
Ptgr2	0.0741409	0.0208333	24	21	2.26486	24.4257	21.4569	23.1956	26.6328
Hp1bp3	0.0741409	0.0208333	24	3	2.2597	22.4528	20.4904	17.499	19.0528
Tmem220	0.0741409	0.0208333	24	21	2.25785	11.4046	9.11547	9.20916	13.3062
Tbc1d22a	0.0741409	0.0208333	24	3	2.25627	24.0318	22.9399	18.8235	21.7665
Mreg	0.0741409	0.0208333	24	0	2.25567	5.28722	1.92911	1.22639	4.24828
Alad	0.0741409	0.0208333	24	0	2.25295	28.403	26.0288	22.1174	26.1155
Tmub2	0.0741409	0.0208333	24	3	2.25214	31.5155	28.5336	26.1697	27.5094
Ddx17	0.0741409	0.0208333	24	18	2.2503	51.2388	48.5753	53.005	53.3604
Tspan4	0.0741409	0.0208333	24	12	2.24747	1.85525	4.82536	7.05554	3.66885
Rbbp7	0.0741409	0.0208333	24	9	2.24351	12.1717	16.6412	12.8472	10.732
Aip	0.0741409	0.0208333	24	15	2.24018	27.8729	28.4996	32.1865	30.5222
Lrrc19	0.0741409	0.0208333	24	3	2.2399	26.5359	21.6384	19.5266	21.4111
Slc25a38	0.0741409	0.0208333	24	6	2.23962	19.4104	20.4566	17.3565	16.1759
Tmem8	0.0741409	0.0208333	24	0	2.23948	94.5491	86.4595	86.048	88.1594
2310009A05Rik	0.0741409	0.0208333	24	0	2.23534	21.6651	18.8646	16.7665	20.2885
Nipal3	0.0741409	0.0208333	24	21	2.23502	11.0975	7.60531	8.94171	11.7711
Tmem131	0.0741409	0.0208333	24	12	2.234	15.3557	17.7254	19.8043	15.8553
6430598A04Rik	0.0741409	0.0208333	24	18	2.23164	7.68575	5.66882	9.80849	9.85811
Dhrs7	0.0741409	0.0208333	24	12	2.23051	9.25574	12.6024	12.6614	9.69922
Sh3gl1	0.0741409	0.0208333	24	15	2.22781	33.8625	35.2182	39.4393	35.9629
Tmed7	0.0741409	0.0208333	24	6	2.21816	23.0074	25.3691	21.8844	20.2182
Cdv3	0.0741409	0.0208333	24	9	2.21494	26.2312	28.6331	26.6195	22.7566
Trib3	0.0741409	0.0208333	24	9	2.21265	8.6603	17.5636	10.0242	7.93809
Smarcc2	0.0741409	0.0208333	24	21	2.21261	19.3457	15.2883	17.923	20.1238
Tug1	0.0741409	0.0208333	24	6	2.21095	18.5076	19.3369	16.663	14.928
Irf2bp2	0.0741409	0.0208333	24	21	2.20903	10.9863	7.46733	8.8314	11.5605
3110002H16Rik	0.0741409	0.0208333	24	12	2.20497	10.5727	14.1312	15.0926	12.4145
Immp2l	0.0741409	0.0208333	24	15	2.20066	15.3087	17.2908	27.4161	17.3835
Naip2	0.0741409	0.0208333	24	0	2.19659	21.689	18.3447	17.5234	20.392
Fbxo34	0.0741409	0.0208333	24	9	2.19599	16.9944	22.5926	17.3931	15.3227
Cln8	0.0741409	0.0208333	24	12	2.19588	12.485	15.3272	17.771	14.4023
Sgpp2	0.0741409	0.0208333	24	21	2.19228	26.6932	22.3292	25.7022	27.7691
Ltv1	0.0741409	0.0208333	24	6	2.18935	11.0656	13.8702	10.2623	8.48107
Sarnp	0.0741409	0.0208333	24	9	2.18899	20.5294	22.5932	21.6732	16.9173
Samd9l	0.0741409	0.0208333	24	21	2.18825	33.6558	21.9222	33.0179	35.081
Srsf7	0.0741409	0.0208333	24	12	2.18712	12.3532	15.6671	17.4257	14.5535
Drg2	0.0741409	0.0208333	24	9	2.18538	16.2177	19.5477	18.5967	15.7455
Acox3	0.0741409	0.0208333	24	0	2.17534	19.4265	15.8443	14.9151	17.4857
4930481A15Rik	0.0741409	0.0208333	24	3	2.17302	8.24508	6.89882	4.39676	4.60091
Rrp1	0.0741409	0.0208333	24	6	2.16884	38.7496	40.5854	38.5406	33.6012
Naa20	0.0741409	0.0208333	24	9	2.16873	23.6859	26.427	24.6028	21.2098
Igbp1	0.0741409	0.0208333	24	6	2.16693	69.103	70.3921	68.3491	63.6571
Dnajb12	0.0741409	0.0208333	24	21	2.16594	28.9014	25.5829	26.53	29.3377
Lin7c	0.0741409	0.0208333	24	15	2.163	14.1334	15.4422	19.9832	16.1727
Usp3	0.0741409	0.0208333	24	0	2.16283	16.2169	12.7154	10.6158	13.2317
Ndel1	0.0741409	0.0208333	24	12	2.16035	11.1418	13.4374	16.355	12.5402
Adar	0.0741409	0.0208333	24	18	2.15982	11.1953	10.2162	13.7328	13.7876
Rsl1d1	0.0741409	0.0208333	24	12	2.15027	7.93563	11.1014	11.2324	8.31629
Ccdc116	0.0741409	0.0208333	24	6	2.14855	7.13268	8.64068	5.91014	3.78621
Ccdc120	0.0741409	0.0208333	24	15	2.14575	10.5595	12.4809	15.959	13.1505
Gps1	0.0741409	0.0208333	24	6	2.13903	28.4029	28.885	25.926	25.3118
Pigl	0.0741409	0.0208333	24	21	2.13831	11.7197	8.13578	9.30056	11.7647
Mlycd	0.0741409	0.0208333	24	3	2.13797	26.4649	25.1654	20.9202	24.4492
Inpp5k	0.0741409	0.0208333	24	3	2.13656	17.5666	15.7638	13.3889	13.8984
Glrx3	0.0741409	0.0208333	24	6	2.13525	20.6988	21.6795	19.4582	16.8807
4932438A13Rik	0.0741409	0.0208333	24	0	2.1333	6.47454	3.50004	2.99358	6.05297
Fermt1	0.0741409	0.0208333	24	0	2.13187	8.22733	4.95451	4.87208	7.62911
Fcf1	0.0741409	0.0208333	24	6	2.13037	38.0419	40.8443	36.9479	35.9127
Baiap2l2	0.0741409	0.0208333	24	9	2.12556	112.541	114.545	114.036	106.968
1110065P20Rik	0.0741409	0.0208333	24	9	2.1204	12.3618	14.8793	14.0926	10.6127
Itgb1	0.0741409	0.0208333	24	9	2.11828	44.7603	47.573	46.6826	43.5039
Pkp2	0.0741409	0.0208333	24	9	2.11428	17.5205	20.8509	19.3203	16.6706
Tada3	0.0741409	0.0208333	24	18	2.10976	13.4307	12.3975	15.4517	16.3438
Cyp2c65	0.0741409	0.0208333	24	9	2.10955	62.3479	64.3368	63.1429	53.4471
Hif1a	0.0741409	0.0208333	24	12	2.10868	3.21337	6.35674	7.75143	4.93056
Pam16	0.0741409	0.0208333	24	18	2.10477	53.3792	49.5373	54.1433	55.3636
Ttyh2	0.0741409	0.0208333	24	0	2.10382	35.0607	29.6396	28.4086	30.3921
Gmip	0.0741409	0.0208333	24	21	2.10088	13.3233	10.4131	11.0147	14.0467
S100z	0.0741409	0.0208333	24	15	2.10021	3.41167	4.11748	7.78182	5.68762
Anapc5	0.0741409	0.0208333	24	9	2.097	19.5863	21.9402	19.8229	16.2456
Gm12669	0.0741409	0.0208333	24	6	2.09668	16.5519	17.8984	15.6388	12.8812
Eny2	0.0741409	0.0208333	24	9	2.09477	11.8315	14.0708	13.2029	9.5173
Trp53i13	0.0741409	0.0208333	24	18	2.09388	16.3158	16.0545	18.9754	19.3173
Hnrnpul2	0.0741409	0.0208333	24	21	2.09272	30.6127	27.4325	29.1041	31.843
Snrnp27	0.0741409	0.0208333	24	15	2.09095	21.2984	22.1217	25.0874	24.2468
Galk1	0.0741409	0.0208333	24	6	2.08982	8.24623	11.3478	7.9016	5.78154
Gchfr	0.0741409	0.0208333	24	0	2.08621	95.5467	87.28	85.4446	87.4115
Ssh3	0.0741409	0.0208333	24	21	2.08508	22.8345	18.9678	22.264	24.2948
Gstz1	0.0741409	0.0208333	24	6	2.08402	17.5128	20.8059	17.2327	15.1915
Phc2	0.0741409	0.0208333	24	21	2.0773	28.7265	26.768	27.2825	33.3188
Zmat5	0.0741409	0.0208333	24	6	2.07645	36.5718	36.8277	34.87	31.5941
Col4a2	0.0741409	0.0208333	24	0	2.07475	10.6899	8.67228	6.83775	10.6884
Mrps11	0.0741409	0.0208333	24	6	2.07446	11.2514	13.4472	9.73299	9.09815
1190005F20Rik	0.0741409	0.0208333	24	18	2.06747	15.8217	13.323	17.0709	17.9215
Atg12	0.0741409	0.0208333	24	0	2.06525	24.6542	22.3559	19.8568	23.3999
Gatsl2	0.0741409	0.0208333	24	21	2.06436	9.37446	5.64018	8.87448	10.9791
Arhgef19	0.0741409	0.0208333	24	0	2.06122	21.4899	19.2936	16.7383	20.372
Etf1	0.0741409	0.0208333	24	6	2.05142	15.2929	17.0609	13.7679	12.7836
Creb3	0.0741409	0.0208333	24	6	2.05033	33.1577	36.1682	32.7409	30.7858
Gimap1	0.0741409	0.0208333	24	0	2.04473	12.1695	8.22622	7.67125	9.59904
Rnf130	0.0741409	0.0208333	24	3	2.04351	12.9877	10.7947	7.65918	10.3433
Aim1	0.0741409	0.0208333	24	21	2.04255	19.6256	16.6756	17.4349	20.2621
Flcn	0.0741409	0.0208333	24	6	2.03531	7.1245	10.9123	5.8706	5.20559
Ube2j1	0.0741409	0.0208333	24	12	2.03498	14.3083	17.5958	17.6594	15.1911
Phf5a	0.0741409	0.0208333	24	9	2.03304	32.6013	34.9498	32.7973	29.3955
Isoc1	0.0741409	0.0208333	24	3	2.03233	28.1148	26.8011	20.2094	26.1987
Slc44a3	0.0741409	0.0208333	24	9	2.02143	5.54792	8.30959	7.05513	4.09934
Mrpl16	0.0741409	0.0208333	24	6	2.01723	12.6154	13.8087	11.5782	9.14031
Pmpcb	0.0741409	0.0208333	24	6	2.01557	29.5802	32.7565	29.3883	27.2475
Mrpl40	0.0741409	0.0208333	24	6	2.01511	27.4078	28.0285	25.3485	24.3882
Etnk1	0.0741409	0.0208333	24	12	2.01472	18.6426	20.5421	24.0101	18.8914
Kifc3	0.0741409	0.0208333	24	21	2.00924	17.8929	14.922	16.2178	18.9299
Myo1e	0.0741409	0.0208333	24	18	2.009	30.3341	24.8695	32.0177	32.2282
Scamp4	0.0741409	0.0208333	24	0	2.00808	26.7948	24.7557	22.1064	25.747
Itpr3	0.0741409	0.0208333	24	9	2.0045	6.8962	9.48046	9.24505	6.15973
Ak3	0.0741409	0.0208333	24	3	2.00147	78.7381	77.0691	72.1866	76.8511
Atat1	0.0741409	0.0208333	24	0	2.00113	9.36845	6.87245	5.76296	8.92701
Taf9	0.0741409	0.0208333	24	9	1.9992	27.2242	30.2042	27.3261	24.6515
D630039A03Rik	0.0741409	0.0208333	24	6	1.99576	5.18131	6.18171	3.10125	2.61691
Ttc7	0.0741409	0.0208333	24	0	1.99362	24.9683	22.0349	21.1255	23.8309
Ssna1	0.0741409	0.0208333	24	0	1.99142	21.6174	18.9206	18.4754	21.4112
4933433P14Rik	0.0741409	0.0208333	24	9	1.98884	16.429	19.1879	16.9199	14.0535
Dnase1l1	0.0741409	0.0208333	24	3	1.98623	21.2566	20.7724	18.1731	18.238
Lrch4	0.0741409	0.0208333	24	0	1.98007	11.4663	8.27232	7.52251	9.929
Mrpl3	0.0741409	0.0208333	24	6	1.98002	10.7129	11.6339	8.92141	7.82505
Vps41	0.0741409	0.0208333	24	6	1.97856	22.3012	23.2103	21.1806	18.7347
Snhg9	0.0741409	0.0208333	24	6	1.97799	5.33394	7.92067	4.57406	3.08595
Cyp1a1	0.0741409	0.0208333	24	21	1.97772	2.32724	0.462631	1.34487	5.70063
Ppp1r14a	0.0741409	0.0208333	24	0	1.97721	17.6197	13.9697	13.576	15.5184
Scamp2	0.0741409	0.0208333	24	15	1.97707	111.072	112.295	116.702	112.936
2810002N01Rik	0.0741409	0.0208333	24	9	1.97704	15.3575	17.555	15.6092	12.2148
G630025P09Rik	0.0741409	0.0208333	24	21	1.97654	19.4822	17.2074	18.0839	21.3996
Sh3glb1	0.0741409	0.0208333	24	18	1.97325	27.855	27.7033	29.5637	31.9602
Def8	0.0741409	0.0208333	24	0	1.97309	11.9591	8.97421	8.33354	10.9294
Glyr1	0.0741409	0.0208333	24	6	1.97191	32.0559	32.8303	29.7074	29.6014
Zbtb7a	0.0741409	0.0208333	24	18	1.9717	16.7751	16.2885	18.6289	20.0115
Ddx47	0.0741409	0.0208333	24	12	1.97078	12.6893	15.9339	15.9852	13.6556
Cdc37	0.0741409	0.0208333	24	6	1.96922	36.1544	36.792	34.9354	32.1541
Tpd52l2	0.0741409	0.0208333	24	12	1.96208	13.5432	15.5697	18.9183	15.3952
Pcsk5	0.0741409	0.0208333	24	21	1.95144	20.5713	18.4685	19.963	23.3797
Elf4	0.0741409	0.0208333	24	15	1.94497	17.4589	18.5425	21.9582	19.5444
Mob2	0.0741409	0.0208333	24	0	1.94271	22.8916	19.0622	18.7335	20.5651
Tmem38b	0.0741409	0.0208333	24	6	1.94238	10.5858	17.8905	9.95454	8.75451
Cml1	0.0741409	0.0208333	24	6	1.939	11.7822	14.4486	10.8496	9.89689
Cetn2	0.0741409	0.0208333	24	18	1.93627	8.79477	8.29124	10.7982	11.7644
Mtcp1	0.0741409	0.0208333	24	0	1.93026	11.7677	8.56902	8.06597	10.3269
Gorasp2	0.0741409	0.0208333	24	6	1.92888	38.5264	39.6181	37.4062	35.2826
Polr2g	0.0741409	0.0208333	24	3	1.92708	36.0782	34.3083	30.7308	34.2051
Smap2	0.0741409	0.0208333	24	9	1.92708	20.8952	23.7182	22.3203	19.6927
Fam168b	0.0741409	0.0208333	24	3	1.92609	18.8715	16.0834	13.5401	15.967
Oxa1l	0.0741409	0.0208333	24	6	1.92584	15.1002	15.2224	12.4837	12.3918
Rbm6	0.0741409	0.0208333	24	21	1.92474	15.2233	12.8177	13.1215	16.1599
Polr2c	0.0741409	0.0208333	24	9	1.92043	18.624	20.4346	19.7904	16.0888
Ankmy2	0.0741409	0.0208333	24	3	1.92011	16.0808	14.9362	11.8728	13.7133
Arfgap1	0.0741409	0.0208333	24	3	1.92001	19.6802	18.2607	15.2163	17.294
Ppp6c	0.0741409	0.0208333	24	9	1.91545	18.8038	21.5731	20.505	17.8566
1110049F12Rik	0.0741409	0.0208333	24	3	1.91089	30.7784	26.3407	24.5391	25.1778
Cd302	0.0741409	0.0208333	24	6	1.91057	28.3703	32.6405	27.5963	26.569
Nr2f6	0.0741409	0.0208333	24	3	1.90919	34.6781	31.5204	29.7204	29.8143
Lztr1	0.0741409	0.0208333	24	21	1.90728	14.5845	12.7863	13.1451	17.0733
Scnm1	0.0741409	0.0208333	24	21	1.90548	40.6372	38.8407	40.4245	46.0918
G3bp2	0.0741409	0.0208333	24	3	1.89805	21.0607	20.6907	17.3939	18.989
Pxmp4	0.0741409	0.0208333	24	21	1.89699	16.8601	14.6257	16.083	19.2141
Mrpl22	0.0741409	0.0208333	24	6	1.89459	19.0885	21.6026	18.6219	16.7105
Senp3	0.0741409	0.0208333	24	9	1.89437	19.8523	22.3448	20.9136	18.048
Ccny	0.0741409	0.0208333	24	6	1.89353	14.792	16.4709	13.6753	12.2319
Mrps35	0.0741409	0.0208333	24	6	1.88985	17.7426	19.6547	17.1299	14.9221
Asnsd1	0.0741409	0.0208333	24	6	1.88822	13.9397	15.8158	13.1447	11.2701
Evpl	0.0741409	0.0208333	24	18	1.88767	9.96746	7.28201	10.5317	12.0569
Atad1	0.0741409	0.0208333	24	6	1.88645	18.2738	18.9459	16.1503	15.7337
Mtm1	0.0741409	0.0208333	24	6	1.88645	16.2628	16.614	14.6157	12.9254
Snrpa	0.0741409	0.0208333	24	21	1.88204	35.4425	28.5407	34.9819	36.7563
Stard7	0.0741409	0.0208333	24	6	1.88013	14.7244	14.7459	12.9733	10.1572
Sidt2	0.0741409	0.0208333	24	18	1.87769	42.7375	38.6927	43.2969	44.5078
Arhgef3	0.0741409	0.0208333	24	18	1.87362	12.8416	12.6652	15.3345	15.4717
2310004N24Rik	0.0741409	0.0208333	24	15	1.87242	19.7508	20.5767	23.601	22.0225
Mtmr14	0.0741409	0.0208333	24	3	1.87153	21.3748	17.6338	15.8693	16.6141
Nadsyn1	0.0741409	0.0208333	24	12	1.86885	20.7165	23.0989	24.453	21.5495
Fam20b	0.0741409	0.0208333	24	6	1.8675	33.0799	35.7524	31.8672	31.3192
Coq9	0.0741409	0.0208333	24	6	1.86666	31.1993	31.7953	29.7571	27.9578
2610034B18Rik	0.0741409	0.0208333	24	0	1.86475	45.7735	41.6414	40.9621	42.7202
Zfand2a	0.0741409	0.0208333	24	9	1.86394	8.78045	11.8485	10.3328	8.12884
Nsmce2	0.0741409	0.0208333	24	9	1.86086	14.2811	16.8368	15.4875	12.7799
Med6	0.0741409	0.0208333	24	9	1.85803	17.4103	20.4898	19.1834	17.0076
H13	0.0741409	0.0208333	24	9	1.85322	18.6368	21.0764	19.387	16.5849
Gga1	0.0741409	0.0208333	24	0	1.84459	29.0922	26.0668	24.3927	26.5846
Nupr1	0.0741409	0.0208333	24	12	1.84268	15.5199	20.1499	20.4216	18.6843
Mapkbp1	0.0741409	0.0208333	24	21	1.84117	5.82313	2.66954	4.68339	6.73742
Ufd1l	0.0741409	0.0208333	24	6	1.83784	21.7484	22.6855	20.4624	18.7733
Nudt16l1	0.0741409	0.0208333	24	6	1.83675	14.1013	14.3496	12.6148	10.641
Ush1c	0.0741409	0.0208333	24	12	1.836	155.338	157.069	178.179	156.237
Atxn2l	0.0741409	0.0208333	24	18	1.83526	19.2521	18.1145	21.2588	21.2987
Hgs	0.0741409	0.0208333	24	18	1.83434	29.6074	27.1956	30.428	31.5633
Pa2g4	0.0741409	0.0208333	24	9	1.83434	18.7788	21.0693	20.4354	17.5376
Tbc1d17	0.0741409	0.0208333	24	0	1.8319	9.84826	6.90249	5.712	7.94763
Brms1	0.0741409	0.0208333	24	15	1.829	36.077	37.1762	39.3857	39.0407
Fat1	0.0741409	0.0208333	24	12	1.82784	17.982	20.4702	21.9239	19.2422
Ift46	0.0741409	0.0208333	24	3	1.82769	14.277	12.4753	10.6361	10.9467
Ptplad1	0.0741409	0.0208333	24	9	1.82567	10.4193	13.2797	11.0715	8.76813
Rogdi	0.0741409	0.0208333	24	3	1.82115	13.1475	12.8498	9.96391	10.8824
M6pr	0.0741409	0.0208333	24	6	1.81734	64.2387	65.6486	63.9352	58.2812
Pvrl3	0.0741409	0.0208333	24	3	1.81709	46.9235	44.3013	42.0784	44.0069
Mrps33	0.0741409	0.0208333	24	0	1.80984	39.2403	36.7284	34.4432	37.0503
Rpl7l1	0.0741409	0.0208333	24	9	1.8098	16.9875	19.7176	18.915	16.5262
Ifih1	0.0741409	0.0208333	24	21	1.80736	14.9075	12.5618	14.6392	17.4055
Mospd2	0.0741409	0.0208333	24	18	1.80722	4.73431	3.75618	6.36238	7.23971
Tob2	0.0741409	0.0208333	24	12	1.80387	8.38389	11.354	13.2514	11.1194
Snx25	0.0741409	0.0208333	24	6	1.80026	22.6287	27.9976	21.7719	20.9314
Gpbp1l1	0.0741409	0.0208333	24	18	1.79909	30.6805	29.019	31.8588	32.9293
Lrrc42	0.0741409	0.0208333	24	3	1.79676	20.6985	17.7249	16.0199	17.3215
Ndufs4	0.0741409	0.0208333	24	9	1.79602	61.8283	63.5216	63.1419	52.0883
Tmco6	0.0741409	0.0208333	24	21	1.79221	7.6818	4.89241	7.27375	9.55349
Uchl3	0.0741409	0.0208333	24	9	1.78733	9.82828	12.3557	11.8205	9.2926
Ccdc91	0.0741409	0.0208333	24	3	1.77753	17.7363	15.8755	13.9774	14.6068
Plau	0.0741409	0.0208333	24	21	1.77632	14.6238	12.5541	14.0903	17.0448
Ict1	0.0741409	0.0208333	24	9	1.77395	25.515	27.1875	26.0539	20.8096
Asb8	0.0741409	0.0208333	24	15	1.77339	14.7856	15.8298	19.1627	16.4686
Entpd2	0.0741409	0.0208333	24	18	1.77247	27.7549	26.0106	28.9522	29.8266
2310004I24Rik	0.0741409	0.0208333	24	21	1.77226	39.3176	33.0894	38.6376	40.3085
Bmp3	0.0741409	0.0208333	24	12	1.77201	3.29821	5.31216	6.41108	3.41302
Fbxw9	0.0741409	0.0208333	24	6	1.77162	9.722	10.2367	8.16093	6.78687
4930404N11Rik	0.0741409	0.0208333	24	0	1.76897	9.03786	5.73715	5.00302	6.7057
Alkbh7	0.0741409	0.0208333	24	3	1.76801	17.8017	15.3662	13.6236	14.5436
Ptrf	0.0741409	0.0208333	24	21	1.76706	6.96123	5.29523	5.89972	9.2323
Ino80b	0.0741409	0.0208333	24	0	1.76579	16.5087	13.3915	12.7404	14.6176
Capza2	0.0741409	0.0208333	24	6	1.76497	76.1658	77.6104	75.7939	72.9902
Abl1	0.0741409	0.0208333	24	15	1.76299	11.7589	12.5934	14.7153	14.6235
Fkbp15	0.0741409	0.0208333	24	21	1.75929	10.7998	8.20045	8.75032	11.127
E230016M11Rik	0.0741409	0.0208333	24	15	1.75716	6.63016	8.74471	10.7916	9.55326
Gnpnat1	0.0741409	0.0208333	24	9	1.75577	10.083	12.3366	10.644	7.93154
Araf	0.0741409	0.0208333	24	3	1.7555	26.1335	24.5298	22.6096	23.0884
Hnrnpul1	0.0741409	0.0208333	24	0	1.75483	20.6878	18.1185	17.9662	20.3603
Crat	0.0741409	0.0208333	24	15	1.75423	31.8233	31.9455	35.375	33.4772
Jakmip1	0.0741409	0.0208333	24	21	1.75005	9.65239	7.1871	7.35998	9.84458
Dmap1	0.0741409	0.0208333	24	0	1.74813	12.6553	10.0138	9.73963	12.0426
Rb1	0.0741409	0.0208333	24	12	1.7456	13.1862	15.3085	17.5954	14.7804
Dazap1	0.0741409	0.0208333	24	18	1.74486	20.5585	20.5252	22.9217	23.0972
Pik3c3	0.0741409	0.0208333	24	0	1.74441	11.3846	9.03892	8.17534	10.7636
Vps37b	0.0741409	0.0208333	24	9	1.74157	19.4867	22.4251	21.0291	19.0416
Plxnb2	0.0741409	0.0208333	24	21	1.74065	75.9446	64.8659	75.0815	76.7226
Minpp1	0.0741409	0.0208333	24	9	1.73867	22.9768	24.9322	23.463	20.5007
Smad4	0.0741409	0.0208333	24	12	1.73842	14.0457	16.0124	18.3324	15.3821
Slc2a1	0.0741409	0.0208333	24	12	1.7356	5.02333	6.69884	8.25689	5.02338
Zfpl1	0.0741409	0.0208333	24	3	1.73506	25.4474	24.1575	22.0486	22.6488
Hgfac	0.0741409	0.0208333	24	12	1.73446	9.87984	11.5151	14.3397	10.1701
Timm50	0.0741409	0.0208333	24	9	1.73429	13.6292	15.2643	14.0802	9.51076
2410017I17Rik	0.0741409	0.0208333	24	21	1.73327	6.29326	4.36235	4.65129	7.6228
4933434E20Rik	0.0741409	0.0208333	24	3	1.73192	23.7487	22.7411	20.7536	20.8376
Ubxn8	0.0741409	0.0208333	24	6	1.73087	9.07878	9.37867	7.39834	6.16347
Keap1	0.0741409	0.0208333	24	0	1.72835	19.1946	16.4415	16.2249	18.3603
Ripk4	0.0741409	0.0208333	24	18	1.72685	10.2952	7.97653	11.1445	12.0115
Nxf1	0.0741409	0.0208333	24	18	1.72368	32.969	31.7418	34.626	34.9601
Sh3bgr	0.0741409	0.0208333	24	18	1.7206	3.91825	1.45811	3.92132	6.32163
Slc25a13	0.0741409	0.0208333	24	3	1.71701	7.98053	7.45511	5.22115	5.35804
Zbtb22	0.0741409	0.0208333	24	0	1.71332	17.8342	14.6223	13.5578	15.1919
Rnf121	0.0741409	0.0208333	24	6	1.71084	18.123	19.8417	16.6762	16.4495
Slc39a11	0.0741409	0.0208333	24	9	1.70912	10.2072	11.9313	11.682	8.57197
Tbrg4	0.0741409	0.0208333	24	6	1.7047	11.9915	13.6075	11.3449	9.43247
Tm9sf1	0.0741409	0.0208333	24	6	1.70109	21.3773	22.6241	20.5454	18.6446
Akt2	0.0741409	0.0208333	24	21	1.70095	16.2818	13.8117	14.1115	16.4524
Sars	0.0741409	0.0208333	24	9	1.6902	19.8094	22.2428	19.9093	17.5621
2310039L15Rik	0.0741409	0.0208333	24	18	1.68786	5.19491	5.0914	7.34427	7.71604
Ormdl2	0.0741409	0.0208333	24	18	1.68458	53.3088	52.7927	54.9628	55.9034
Dtymk	0.0741409	0.0208333	24	12	1.68186	4.46062	7.60427	7.79396	6.18058
Mapkapk2	0.0741409	0.0208333	24	9	1.67871	31.4817	33.1079	31.7323	28.6104
Nae1	0.0741409	0.0208333	24	3	1.6774	15.603	14.4814	12.1553	13.1847
Slbp	0.0741409	0.0208333	24	9	1.67719	13.9998	16.8863	14.6274	12.7701
Hnrnph1	0.0741409	0.0208333	24	12	1.67531	26.3218	28.8654	30.1387	27.9438
Nhp2	0.0741409	0.0208333	24	6	1.67433	10.1297	12.1377	9.62247	7.90922
Papd4	0.0741409	0.0208333	24	3	1.67054	16.1144	15.5526	12.7444	14.1976
Mob3a	0.0741409	0.0208333	24	12	1.66991	9.95548	12.2031	14.4447	11.9691
Nup88	0.0741409	0.0208333	24	9	1.66845	9.86966	12.8151	11.5746	9.80096
Tm7sf3	0.0741409	0.0208333	24	6	1.66722	11.7434	12.9477	10.0956	9.8799
Nhlrc2	0.0741409	0.0208333	24	9	1.6649	6.78157	9.04626	8.6043	6.15993
Ppm1g	0.0741409	0.0208333	24	9	1.66315	17.3489	19.1911	18.8211	15.9592
Iscu	0.0741409	0.0208333	24	9	1.6628	60.9887	62.5564	62.3474	51.9722
Mark2	0.0741409	0.0208333	24	12	1.6623	33.0894	34.7107	37.0589	33.9785
Fbxw17	0.0741409	0.0208333	24	0	1.66193	11.7047	8.08889	6.8511	8.41798
Ell	0.0741409	0.0208333	24	15	1.66092	18.8942	19.6318	21.9694	21.2544
Tmem218	0.0741409	0.0208333	24	18	1.65512	3.69607	2.71407	4.34031	6.75123
Yipf2	0.0741409	0.0208333	24	6	1.65382	22.9319	23.4768	21.8881	19.8429
Pcx	0.0741409	0.0208333	24	15	1.65081	13.1077	13.5029	18.4243	14.6641
Ppp1r37	0.0741409	0.0208333	24	3	1.64841	29.7375	28.0505	26.3363	26.7893
Rassf1	0.0741409	0.0208333	24	6	1.64646	43.277	44.6749	41.9034	41.3916
Ttc1	0.0741409	0.0208333	24	6	1.6454	17.7101	18.7094	16.6942	15.0714
Plekhn1	0.0741409	0.0208333	24	21	1.64476	7.54927	5.99858	6.44401	12.3442
Cdc25a	0.0741409	0.0208333	24	21	1.64424	12.5965	9.10409	12.4049	13.9551
Polr2a	0.0741409	0.0208333	24	21	1.64127	11.5742	10.0268	11.2538	15.2088
Isca2	0.0741409	0.0208333	24	12	1.64056	28.3496	30.091	32.1747	29.2759
Vta1	0.0741409	0.0208333	24	9	1.64049	39.7621	41.9486	40.7418	38.2883
Mrpl55	0.0741409	0.0208333	24	6	1.63745	20.8872	21.6398	20.096	16.8492
Ttc39c	0.0741409	0.0208333	24	18	1.63596	16.3929	15.6926	17.6803	19.0324
Ptger4	0.0741409	0.0208333	24	15	1.63575	14.0781	14.7008	20.6272	15.6203
2500003M10Rik	0.0741409	0.0208333	24	6	1.63267	20.2756	20.3313	18.7851	17.2039
Nit2	0.0741409	0.0208333	24	6	1.63163	7.96187	10.4489	6.86794	6.42355
Ube1y1	0.0741409	0.0208333	24	15	1.63065	4.62151	4.84329	7.68863	6.38835
Serping1	0.0741409	0.0208333	24	18	1.62917	31.1741	30.5768	32.1128	36.0403
Cox16	0.0741409	0.0208333	24	6	1.62638	13.1628	13.4529	11.6029	10.4127
Pex11c	0.0741409	0.0208333	24	0	1.62338	18.1577	16.284	15.2351	17.953
Pde6d	0.0741409	0.0208333	24	18	1.62281	21.1336	19.2516	21.5516	23.4236
Slc35a4	0.0741409	0.0208333	24	9	1.62175	19.8188	21.6911	21.112	18.3973
Pank1	0.0741409	0.0208333	24	18	1.61965	3.85365	2.8575	4.90875	6.38345
Fam120b	0.0741409	0.0208333	24	15	1.61779	7.65891	8.18928	10.3169	10.1071
Atf6	0.0741409	0.0208333	24	6	1.61762	9.97647	11.3124	9.2278	7.48575
Dirc2	0.0741409	0.0208333	24	6	1.61654	12.5849	12.7953	10.9005	9.90743
Txnrd2	0.0741409	0.0208333	24	3	1.61368	9.24033	8.18709	5.96296	6.90027
Fbxl5	0.0741409	0.0208333	24	0	1.61298	26.248	24.2788	22.6216	25.2146
Nol7	0.0741409	0.0208333	24	9	1.61288	18.1552	19.8187	18.4287	15.5303
Mta3	0.0741409	0.0208333	24	21	1.6115	17.6712	15.3864	15.5028	17.776
1110038F14Rik	0.0741409	0.0208333	24	21	1.60965	11.2147	9.07102	10.2888	12.6979
Gstm5	0.0741409	0.0208333	24	12	1.60798	7.12937	8.64539	15.5805	7.88371
Med10	0.0741409	0.0208333	24	15	1.60676	26.9288	27.8056	30.7114	28.5676
BC016579	0.0741409	0.0208333	24	15	1.60393	7.36249	8.922	11.0725	9.7486
5930434B04Rik	0.0741409	0.0208333	24	6	1.60393	14.1335	15.2934	12.9239	11.9664
Alg14	0.0741409	0.0208333	24	9	1.60105	7.59585	9.86378	9.71677	7.45625
Oplah	0.0741409	0.0208333	24	15	1.60013	6.6984	7.89773	9.85631	9.26566
Lrp12	0.0741409	0.0208333	24	18	1.59966	10.042	9.35068	11.2372	12.68
Eif3j	0.0741409	0.0208333	24	12	1.59953	9.18529	10.8544	12.2369	9.38186
A930001N09Rik	0.0741409	0.0208333	24	0	1.59745	7.37177	5.15266	3.68058	5.97974
Anxa1	0.0741409	0.0208333	24	18	1.59471	6.73128	5.96348	7.52129	9.68399
Prmt1	0.0741409	0.0208333	24	9	1.59156	8.96152	11.3723	10.4868	8.39596
Socs3	0.0741409	0.0208333	24	9	1.59003	9.82529	31.3022	11.2479	9.74881
Ecsit	0.0741409	0.0208333	24	12	1.58913	5.97693	8.1377	8.7971	6.46314
Nlrx1	0.0741409	0.0208333	24	21	1.58814	5.21989	2.17005	3.83292	5.33023
Tomm70a	0.0741409	0.0208333	24	6	1.58806	9.80003	11.2708	8.47662	8.1025
Rangrf	0.0741409	0.0208333	24	12	1.58637	4.71805	7.50206	8.37303	6.67011
Dus1l	0.0741409	0.0208333	24	6	1.58367	15.6528	15.8024	14.3093	11.8718
Dyrk2	0.0741409	0.0208333	24	18	1.5822	11.0656	9.16585	11.3236	13.383
Pex6	0.0741409	0.0208333	24	21	1.58155	20.0702	17.6197	18.1425	20.1653
Grpel2	0.0741409	0.0208333	24	3	1.57388	17.6573	16.9683	14.4761	15.6979
Dab2ip	0.0741409	0.0208333	24	21	1.57331	18.094	15.7198	16.5125	18.5883
Nlrc4	0.0741409	0.0208333	24	12	1.57268	17.8616	19.8483	21.2281	18.7666
Psmd2	0.0741409	0.0208333	24	9	1.56946	42.6005	47.3328	43.7709	42.2912
Sertad3	0.0741409	0.0208333	24	21	1.56896	19.4677	16.8328	19.0908	20.8936
Esrp1	0.0741409	0.0208333	24	9	1.56865	11.5859	13.7615	13.1094	10.8482
Erp44	0.0741409	0.0208333	24	9	1.56808	24.9028	28.5721	25.0993	23.6209
Nudt21	0.0741409	0.0208333	24	6	1.56797	18.4829	18.6194	17.1411	14.3458
Tmed3	0.0741409	0.0208333	24	6	1.56564	34.0593	34.4106	32.9345	31.0888
Slc44a1	0.0741409	0.0208333	24	0	1.5643	17.1128	15.2558	13.5612	16.1287
Xpa	0.0741409	0.0208333	24	3	1.56387	18.5132	15.8766	14.1784	15.7881
Oas1g	0.0741409	0.0208333	24	18	1.55632	12.1358	9.97715	12.5508	13.9641
Sigirr	0.0741409	0.0208333	24	18	1.55599	22.4283	20.0196	23.2139	23.8953
Pex7	0.0741409	0.0208333	24	6	1.55387	13.7461	14.8774	12.9066	11.3219
Irf2	0.0741409	0.0208333	24	15	1.55312	24.1138	26.8647	28.329	27.4944
2810474O19Rik	0.0741409	0.0208333	24	9	1.55282	8.28137	10.7929	9.89825	8.01774
Ptov1	0.0741409	0.0208333	24	6	1.54931	15.1812	15.5955	14.1348	11.4092
Zfp773	0.0741409	0.0208333	24	21	1.54443	4.88731	1.67972	3.95474	5.41084
Hmox2	0.0741409	0.0208333	24	6	1.54305	20.8318	21.96	20.0793	18.3481
Spsb1	0.0741409	0.0208333	24	15	1.54296	6.73058	6.73702	10.698	8.1853
Icosl	0.0741409	0.0208333	24	18	1.5424	6.62437	6.09413	8.46041	8.62067
C530008M17Rik	0.0741409	0.0208333	24	9	1.537	23.6334	34.4686	24.1077	22.6586
Tmem51	0.0741409	0.0208333	24	3	1.53647	28.1523	23.2809	21.8323	22.9412
Ik	0.0741409	0.0208333	24	6	1.53364	36.2179	36.8177	34.4021	34.2957
Magi3	0.0741409	0.0208333	24	9	1.53199	8.57268	11.0031	10.3766	8.4739
Pex5	0.0741409	0.0208333	24	3	1.53156	17.5041	15.971	13.9336	15.2096
Rybp	0.0741409	0.0208333	24	12	1.53038	7.1025	9.60134	10.2318	8.40207
Slc12a8	0.0741409	0.0208333	24	9	1.5302	7.75569	11.7154	9.17776	7.73507
Nploc4	0.0741409	0.0208333	24	3	1.52958	16.4255	16.2855	14.1545	14.2302
Xylt2	0.0741409	0.0208333	24	0	1.5284	8.74304	6.7403	4.64285	6.96309
Add3	0.0741409	0.0208333	24	6	1.52781	21.8406	23.4401	21.4959	19.4635
Dnajc7	0.0741409	0.0208333	24	6	1.52693	42.4713	47.4483	41.2449	41.0317
Tmx2	0.0741409	0.0208333	24	6	1.52636	26.0655	26.671	24.4522	23.9671
Tbc1d20	0.0741409	0.0208333	24	9	1.52555	20.4922	25.6317	21.0657	19.6274
Prosc	0.0741409	0.0208333	24	3	1.52194	23.5027	21.4387	19.9639	20.6728
Setd7	0.0741409	0.0208333	24	21	1.52115	5.32728	3.67433	3.69948	6.34899
Hdac11	0.0741409	0.0208333	24	6	1.51901	6.69422	9.46754	6.15076	5.26208
St3gal1	0.0741409	0.0208333	24	18	1.51758	2.37645	1.43042	3.61566	4.48357
Leprotl1	0.0741409	0.0208333	24	0	1.51384	24.5827	22.2554	21.2019	23.1564
Spg21	0.0741409	0.0208333	24	6	1.51137	14.6334	16.4215	14.3139	12.4662
Yif1b	0.0741409	0.0208333	24	15	1.51112	15.8011	17.4667	18.8914	18.7987
Eif4a3	0.0741409	0.0208333	24	9	1.50801	28.4372	30.3904	28.9704	26.6583
Chchd1	0.0741409	0.0208333	24	9	1.50409	31.2579	32.9984	32.8947	30.381
Nfyc	0.0741409	0.0208333	24	9	1.4973	30.444	33.1159	30.489	28.9259
2310009B15Rik	0.0741409	0.0208333	24	6	1.4967	8.63615	10.4979	8.22432	6.67642
BC021614	0.0741409	0.0208333	24	9	1.49523	3.27027	5.69905	4.38041	2.58003
Igfbp5	0.0741409	0.0208333	24	18	1.49442	3.25725	2.6677	4.07665	6.27926
Stk35	0.0741409	0.0208333	24	15	1.49278	3.65844	4.56401	6.51156	5.9331
Tmem170	0.0741409	0.0208333	24	18	1.49277	11.0001	9.61002	11.7788	13.0535
Sprr2b	0.0741409	0.0208333	24	3	1.49172	5.38833	3.09373	1.68732	1.96426
Cetn3	0.0741409	0.0208333	24	12	1.4851	12.0377	13.6876	14.775	12.2244
Lclat1	0.0741409	0.0208333	24	3	1.48347	18.6026	17.4583	15.0716	16.7934
Gpatch8	0.0741409	0.0208333	24	21	1.48277	8.68211	5.95268	7.23254	8.69702
Jarid2	0.0741409	0.0208333	24	15	1.48215	6.14303	7.32176	11.6724	7.54041
Eftud1	0.0741409	0.0208333	24	9	1.48058	11.3391	13.543	12.4886	10.5048
E2f2	0.0741409	0.0208333	24	0	1.4795	4.21129	1.61397	0.885558	2.4729
Sprr2a1	0.0741409	0.0208333	24	0	1.47918	3.62104	0.861875	0.663079	2.08766
Nckap5	0.0741409	0.0208333	24	18	1.47588	3.56214	2.69792	4.68988	5.74459
Cyp2u1	0.0741409	0.0208333	24	6	1.47298	2.49259	7.59987	1.94486	1.10385
Camk1d	0.0741409	0.0208333	24	6	1.47102	8.06727	9.30571	6.80178	6.41052
Oma1	0.0741409	0.0208333	24	18	1.46657	9.19349	8.47023	10.6058	11.206
Frk	0.0741409	0.0208333	24	12	1.46233	22.0165	23.3952	26.9273	22.343
Tsen34	0.0741409	0.0208333	24	6	1.46184	24.4215	24.9549	23.3048	21.9369
Pdcd10	0.0741409	0.0208333	24	0	1.46042	37.5157	32.9808	31.9478	33.3247
Bccip	0.0741409	0.0208333	24	9	1.45809	15.6135	16.9882	15.6198	12.1308
Phactr4	0.0741409	0.0208333	24	21	1.457	11.0253	8.97597	10.9546	13.0263
Gtf2h1	0.0741409	0.0208333	24	9	1.45459	14.9791	16.5437	15.4871	12.9375
Noxo1	0.0741409	0.0208333	24	6	1.45187	16.3414	16.5557	14.7323	14.0583
Fam193b	0.0741409	0.0208333	24	18	1.45104	9.00854	7.49318	9.50279	11.1031
Sec24c	0.0741409	0.0208333	24	3	1.44897	46.1679	45.5933	40.9521	44.8018
Nop58	0.0741409	0.0208333	24	9	1.44825	6.51625	8.9714	7.75273	6.1116
B3galt4	0.0741409	0.0208333	24	0	1.44604	10.9585	7.79528	7.61894	8.98228
Mapkapk3	0.0741409	0.0208333	24	21	1.44603	10.2032	8.7292	9.41882	12.0348
Tnfrsf11a	0.0741409	0.0208333	24	0	1.44394	10.0083	6.15808	6.13528	7.49664
Srm	0.0741409	0.0208333	24	12	1.44336	1.51656	3.89218	4.44426	2.73744
1110008F13Rik	0.0741409	0.0208333	24	9	1.44335	14.8199	16.4034	15.7473	13.2484
Ube2e1	0.0741409	0.0208333	24	6	1.44087	14.2471	14.998	13.4081	11.7616
BC016495	0.0741409	0.0208333	24	12	1.44037	2.74699	4.10498	6.02421	3.12102
Hsph1	0.0741409	0.0208333	24	15	1.43973	2.14797	2.99905	13.2701	3.50536
Cpeb2	0.0741409	0.0208333	24	21	1.43835	5.54681	3.47894	4.05656	6.05697
B4galnt3	0.0741409	0.0208333	24	21	1.43599	5.82021	3.8705	4.65391	6.76579
Tmem82	0.0741409	0.0208333	24	6	1.43571	13.938	16.755	13.4079	12.5844
Vopp1	0.0741409	0.0208333	24	21	1.43422	14.3554	11.6251	14.0857	15.4379
R3hcc1	0.0741409	0.0208333	24	6	1.43382	6.95412	7.48593	5.40555	4.97904
Mrps15	0.0741409	0.0208333	24	12	1.43288	39.5755	41.6144	43.1497	41.1358
Polb	0.0741409	0.0208333	24	15	1.43256	10.8294	11.3283	13.8775	12.3321
Trp53	0.0741409	0.0208333	24	3	1.43256	13.9527	12.1627	9.92142	12.1421
Pcgf5	0.0741409	0.0208333	24	15	1.42921	4.71393	5.13833	7.43082	6.46385
Col6a4	0.0741409	0.0208333	24	21	1.42884	11.6768	9.56004	10.205	12.1296
Plscr2	0.0741409	0.0208333	24	9	1.42786	1.32191	3.88802	2.66424	1.19176
Ctr9	0.0741409	0.0208333	24	6	1.42785	9.81829	10.8439	8.56339	8.06024
Klf15	0.0741409	0.0208333	24	9	1.42723	1.86391	3.99863	3.11027	1.20816
Slc23a2	0.0741409	0.0208333	24	15	1.42646	5.66454	6.16492	8.30226	7.56184
Nfkbib	0.0741409	0.0208333	24	0	1.42344	30.0103	28.231	26.5143	28.7611
Ndor1	0.0741409	0.0208333	24	0	1.42266	8.62096	6.95741	5.42015	7.7805
Ttll3	0.0741409	0.0208333	24	18	1.41962	6.21917	4.84915	6.83358	8.25003
Ubtf	0.0741409	0.0208333	24	21	1.41955	17.9392	15.4946	17.2897	18.8602
Als2	0.0741409	0.0208333	24	6	1.41855	4.79598	10.8688	4.77948	3.45856
Ptk2b	0.0741409	0.0208333	24	21	1.41531	13.5015	11.2161	13.3948	15.1125
Sun1	0.0741409	0.0208333	24	12	1.41464	11.4624	13.4434	14.2889	12.2687
Dcps	0.0741409	0.0208333	24	3	1.41446	8.11897	7.51667	5.44251	6.19242
Pfkfb3	0.0741409	0.0208333	24	12	1.41428	1.61902	2.95242	6.76255	2.6698
Hiatl1	0.0741409	0.0208333	24	21	1.41379	17.8861	15.5611	16.3253	17.9991
Nck1	0.0741409	0.0208333	24	21	1.41337	10.7359	8.66009	10.6374	12.5592
Sar1a	0.0741409	0.0208333	24	6	1.41248	26.2351	26.6579	25.3236	23.5743
Tcirg1	0.0741409	0.0208333	24	21	1.41213	13.4511	11.7721	11.8469	14.162
Rad23a	0.0741409	0.0208333	24	6	1.41149	19.853	20.6484	18.4119	18.0972
Olfr856-ps1	0.0741409	0.0208333	24	18	1.40991	9.53432	7.66725	10.2876	10.9018
Alkbh3	0.0741409	0.0208333	24	9	1.4094	10.8097	12.6856	11.3559	9.24542
Mst1r	0.0741409	0.0208333	24	15	1.40896	7.53993	8.11876	10.0511	9.59273
Pop4	0.0741409	0.0208333	24	6	1.40513	16.7378	17.2484	15.6149	14.397
Twsg1	0.0741409	0.0208333	24	0	1.4039	11.1664	8.81983	8.45394	10.0782
Thnsl2	0.0741409	0.0208333	24	0	1.40332	24.796	23.0876	22.3408	24.6016
2300009A05Rik	0.0741409	0.0208333	24	9	1.40265	11.0789	12.8979	12.46	10.3117
Lxn	0.0741409	0.0208333	24	0	1.40265	35.9142	33.3012	32.4106	33.7649
Timm8a1	0.0741409	0.0208333	24	12	1.40214	7.59841	9.67048	9.85113	7.95735
2023-09-08	0.0741409	0.0208333	24	21	1.40121	8.07821	5.56494	7.0117	8.46164
Mylip	0.0741409	0.0208333	24	15	1.40072	5.98156	6.0224	8.95946	7.30217
D19Wsu162e	0.0741409	0.0208333	24	0	1.39986	22.622	19.5342	18.7627	20.0825
Plekha6	0.0741409	0.0208333	24	18	1.39855	12.3894	10.4288	12.4353	14.3386
Sf3b4	0.0741409	0.0208333	24	9	1.39777	19.2776	20.8102	19.9664	17.5455
Sowahb	0.0741409	0.0208333	24	18	1.397	21.817	20.7208	22.0784	24.4107
Tmc8	0.0741409	0.0208333	24	15	1.39511	9.25484	9.8152	11.9935	11.0225
Rev1	0.0741409	0.0208333	24	12	1.39335	1.83543	3.7746	5.57824	3.57643
Cxcl10	0.0741409	0.0208333	24	9	1.39261	3.90636	6.12757	5.2987	3.58102
Atn1	0.0741409	0.0208333	24	21	1.39127	17.8999	14.2677	17.1989	18.5106
Baz2a	0.0741409	0.0208333	24	18	1.39063	10.8668	10.1944	11.7735	13.221
Frat2	0.0741409	0.0208333	24	9	1.3884	5.0985	7.62635	5.91275	4.51362
Pim3	0.0741409	0.0208333	24	21	1.38787	20.6789	19.3704	19.399	22.7006
Gne	0.0741409	0.0208333	24	6	1.38708	10.3007	12.3966	10.0837	8.69034
Kctd21	0.0741409	0.0208333	24	18	1.38518	4.67097	3.77844	5.71882	6.64848
Jdp2	0.0741409	0.0208333	24	18	1.38275	2.53348	2.47427	3.77794	5.48943
Pigu	0.0741409	0.0208333	24	6	1.38268	13.8709	15.3744	13.2713	12.0632
Sumf1	0.0741409	0.0208333	24	0	1.37858	15.8495	13.4413	12.2048	13.6958
Nap1l4	0.0741409	0.0208333	24	6	1.37854	15.6775	17.5831	15.0532	14.3083
1110012L19Rik	0.0741409	0.0208333	24	3	1.37631	17.7612	15.7125	14.3026	15.2783
Slc39a14	0.0741409	0.0208333	24	3	1.37508	19.0295	18.1057	15.7255	17.5204
Dld	0.0741409	0.0208333	24	9	1.37462	27.753	31.3015	28.4747	27.1787
Ap1m2	0.0741409	0.0208333	24	6	1.37409	60.0399	61.0005	59.705	51.7614
Lysmd4	0.0741409	0.0208333	24	15	1.37198	9.80375	10.1522	12.2585	11.578
Sertad2	0.0741409	0.0208333	24	12	1.36942	8.57034	10.4151	11.121	9.09246
Gse1	0.0741409	0.0208333	24	12	1.36888	5.7643	9.55944	10.2543	8.96371
G6pc3	0.0741409	0.0208333	24	9	1.36776	6.7453	8.72864	7.90409	6.01881
Srp19	0.0741409	0.0208333	24	9	1.36705	18.6296	20.6108	19.0975	17.2121
Gm9855	0.0741409	0.0208333	24	9	1.3662	11.3938	13.5021	11.9691	10.2132
Mafg	0.0741409	0.0208333	24	18	1.36539	10.9581	9.94829	12.1355	12.6328
Brcc3	0.0741409	0.0208333	24	3	1.36486	15.3118	14.3811	12.4017	13.4308
Nr1i2	0.0741409	0.0208333	24	0	1.36454	53.6073	50.4395	49.7733	51.0598
Arl8b	0.0741409	0.0208333	24	3	1.36433	20.3211	19.559	17.7471	18.2741
Ptpn12	0.0741409	0.0208333	24	12	1.36378	6.76423	9.98278	10.2687	8.98292
Dus2l	0.0741409	0.0208333	24	0	1.36042	8.43351	5.62912	5.33694	6.61956
Gtf2h5	0.0741409	0.0208333	24	6	1.35563	24.0303	24.7107	23.2792	21.6275
H2afx	0.0741409	0.0208333	24	15	1.35432	10.3115	11.0848	13.4015	11.8254
1810013L24Rik	0.0741409	0.0208333	24	12	1.35308	10.451	11.7267	13.6204	10.5632
Antxr2	0.0741409	0.0208333	24	21	1.35301	17.2399	15.306	16.0406	17.9336
Galk2	0.0741409	0.0208333	24	6	1.35181	12.8301	13.3955	12.121	9.66964
Pmf1	0.0741409	0.0208333	24	9	1.35147	9.31951	11.6737	10.705	9.23666
Ilk	0.0741409	0.0208333	24	21	1.35128	46.8628	45.5888	46.2437	51.5833
Nr3c2	0.0741409	0.0208333	24	9	1.35003	3.71153	6.62975	4.4911	3.21828
Gt(ROSA)26Sor	0.0741409	0.0208333	24	6	1.34739	19.9705	20.38	18.7832	17.7563
Nat9	0.0741409	0.0208333	24	3	1.34654	17.6567	16.6023	14.3193	16.1311
Ttc38	0.0741409	0.0208333	24	6	1.34619	12.2084	12.9331	11.1521	10.1818
Pbxip1	0.0741409	0.0208333	24	0	1.34258	13.107	10.527	10.5048	11.7706
Sec62	0.0741409	0.0208333	24	15	1.33997	12.412	13.2827	15.4909	13.9938
Trnau1ap	0.0741409	0.0208333	24	6	1.33993	12.5835	12.8197	11.5564	9.17678
Uso1	0.0741409	0.0208333	24	9	1.3393	23.3394	27.3775	23.6773	22.4146
Aspg	0.0741409	0.0208333	24	9	1.33513	2.24337	4.45331	3.46792	1.90153
2700089E24Rik	0.0741409	0.0208333	24	15	1.33416	9.38504	9.40182	12.0344	10.6429
Pla2g2a	0.0741409	0.0208333	24	12	1.33341	0.19649	2.41798	2.71141	1.16146
Akap7	0.0741409	0.0208333	24	3	1.33307	10.6946	10.2207	8.00687	9.13795
Gcdh	0.0741409	0.0208333	24	6	1.32869	6.08756	7.67425	5.43779	4.56593
Btbd2	0.0741409	0.0208333	24	21	1.32756	14.3626	12.1502	13.2476	14.7901
Abhd16a	0.0741409	0.0208333	24	6	1.32646	18.0035	20.6346	17.86	16.7529
Pak1ip1	0.0741409	0.0208333	24	6	1.32614	17.3615	19.4838	16.6072	16.1112
Chst4	0.0741409	0.0208333	24	12	1.32579	8.77767	10.6135	10.9529	9.03884
Rdh5	0.0741409	0.0208333	24	21	1.32569	6.54353	4.62664	4.91644	6.74916
Capza1	0.0741409	0.0208333	24	0	1.32137	51.4916	49.4102	48.4311	50.0871
Lbh	0.0741409	0.0208333	24	18	1.32	6.94725	6.40629	8.00577	9.08128
Rgs2	0.0741409	0.0208333	24	15	1.31872	11.4167	11.9467	13.6352	13.4581
Tinagl1	0.0741409	0.0208333	24	18	1.31702	21.322	16.3059	21.4823	22.5637
Mpzl3	0.0741409	0.0208333	24	12	1.31619	4.14772	5.48282	7.34597	4.95833
Tnfsf13b	0.0741409	0.0208333	24	21	1.31492	4.11823	2.87851	3.80607	6.78822
Tmem30a	0.0741409	0.0208333	24	3	1.31193	19.2348	18.1386	16.7764	16.8863
Hmgb3	0.0741409	0.0208333	24	3	1.31085	9.09336	8.33709	6.35721	7.36561
1700003D09Rik	0.0741409	0.0208333	24	12	1.30702	2.15842	3.85191	4.69342	2.69011
Hiat1	0.0741409	0.0208333	24	15	1.30634	8.76503	8.79567	11.3903	9.99666
Fpgs	0.0741409	0.0208333	24	6	1.30545	2.86591	5.3749	2.83418	1.63512
Tfdp1	0.0741409	0.0208333	24	15	1.30535	12.446	13.2209	16.3887	13.6767
Dcaf15	0.0741409	0.0208333	24	18	1.30345	27.6982	24.749	28.1274	28.9271
Fut4	0.0741409	0.0208333	24	12	1.30308	2.66564	4.32808	5.16093	3.1377
Pak1	0.0741409	0.0208333	24	6	1.30207	34.7648	40.6018	34.0152	33.5372
Ppp3ca	0.0741409	0.0208333	24	12	1.29998	14.8723	16.2453	17.3963	15.0924
Srr	0.0741409	0.0208333	24	0	1.2998	18.4724	16.4636	15.8799	17.5475
Tmem167b	0.0741409	0.0208333	24	0	1.29899	15.2975	13.531	12.0172	13.9248
C2	0.0741409	0.0208333	24	6	1.2974	19.2646	19.2786	18.0554	15.1977
Atoh8	0.0741409	0.0208333	24	15	1.29706	1.38243	1.67394	3.69753	3.02749
Eif2s3x	0.0741409	0.0208333	24	6	1.29634	16.7326	16.8209	15.0924	14.7945
Myadm	0.0741409	0.0208333	24	21	1.29581	31.3024	23.6132	30.825	32.0467
Prnp	0.0741409	0.0208333	24	18	1.29398	3.79123	3.4706	5.15547	5.76628
Mkks	0.0741409	0.0208333	24	9	1.29305	13.1353	14.3544	13.9825	11.0075
Prss27	0.0741409	0.0208333	24	9	1.29285	1.24284	4.00714	2.34298	1.12407
Dopey2	0.0741409	0.0208333	24	21	1.29051	11.9241	10.4121	11.1205	13.2586
Echdc2	0.0741409	0.0208333	24	6	1.29008	12.4186	14.8886	11.5037	11.2023
Ilf2	0.0741409	0.0208333	24	12	1.28956	6.82695	8.40266	9.28286	7.21114
Osbpl11	0.0741409	0.0208333	24	21	1.28948	8.09261	5.74391	7.0011	8.29961
Gstt2	0.0741409	0.0208333	24	9	1.2881	17.1292	19.5405	17.1797	15.9477
Sel1l	0.0741409	0.0208333	24	12	1.28616	15.3907	17.6357	17.8249	16.4321
Mul1	0.0741409	0.0208333	24	0	1.28559	12.4179	10.1335	9.48769	10.8395
AI413582	0.0741409	0.0208333	24	18	1.28446	20.5941	20.3381	21.5491	23.7206
Acbd6	0.0741409	0.0208333	24	9	1.2833	7.04963	8.25954	7.20987	4.5306
1810044D09Rik	0.0741409	0.0208333	24	6	1.2831	6.1002	6.2875	4.69316	4.06538
Pdcd2	0.0741409	0.0208333	24	9	1.28112	10.4329	11.9467	10.6618	8.55205
1700119H24Rik	0.0741409	0.0208333	24	21	1.28052	4.6303	2.67017	3.01971	4.68143
Mical2	0.0741409	0.0208333	24	15	1.27994	5.6688	7.4983	8.98927	7.79806
Zfp410	0.0741409	0.0208333	24	21	1.27944	14.4964	12.8029	13.7319	15.6572
Mycbp	0.0741409	0.0208333	24	6	1.27856	11.9244	13.2341	11.4317	10.1105
Drg1	0.0741409	0.0208333	24	9	1.27799	21.2425	23.2044	21.7971	20.1443
Baz1b	0.0741409	0.0208333	24	15	1.27652	6.29788	6.75106	8.66908	7.99039
Lactb2	0.0741409	0.0208333	24	12	1.27452	5.49115	8.22954	8.42564	7.22401
Lsm14b	0.0741409	0.0208333	24	9	1.27449	11.3977	12.5993	12.323	9.26932
Dscr3	0.0741409	0.0208333	24	9	1.27127	22.7688	24.8491	22.901	21.3856
Brd7	0.0741409	0.0208333	24	0	1.26873	17.2193	15.1362	13.9261	15.4315
Wtap	0.0741409	0.0208333	24	0	1.2677	28.7394	26.3587	25.5179	26.7228
Pdcd6ip	0.0741409	0.0208333	24	15	1.26516	39.4937	39.8638	43.8887	40.6865
Wdr45l	0.0741409	0.0208333	24	6	1.26236	16.879	17.5781	15.4644	15.4222
Vps18	0.0741409	0.0208333	24	3	1.25682	8.59467	8.01106	5.82831	7.22261
Psmd1	0.0741409	0.0208333	24	6	1.25649	18.2517	20.0603	17.721	17.0371
Prdx4	0.0741409	0.0208333	24	9	1.25461	3.7322	5.5725	5.29486	3.5866
Dmrt3	0.0741409	0.0208333	24	21	1.25316	5.28066	0.70189	4.77389	5.95538
Fam102b	0.0741409	0.0208333	24	18	1.25197	9.45458	9.00361	10.8026	11.1967
Zc3h3	0.0741409	0.0208333	24	18	1.2519	11.9477	10.3847	12.4559	13.4174
Tsnax	0.0741409	0.0208333	24	6	1.24879	13.6602	14.1418	12.2275	12.0424
Tgfbr2	0.0741409	0.0208333	24	21	1.24853	9.02908	7.65244	7.66571	9.82045
D230037D09Rik	0.0741409	0.0208333	24	9	1.24592	8.8812	10.877	10.1511	8.62291
Chn2	0.0741409	0.0208333	24	21	1.24557	18.6325	16.568	18.1477	19.6062
Phf1	0.0741409	0.0208333	24	0	1.2427	27.6518	25.8844	24.7237	26.4712
Bag4	0.0741409	0.0208333	24	0	1.24225	7.52113	5.84464	4.09205	5.92918
Lect2	0.0741409	0.0208333	24	6	1.24057	4.88987	5.9604	4.7125	2.62892
Inpp5b	0.0741409	0.0208333	24	0	1.2398	10.8748	9.36944	8.44197	10.4433
Prosapip1	0.0741409	0.0208333	24	3	1.23952	7.58073	6.51647	5.12952	5.46178
Cd97	0.0741409	0.0208333	24	21	1.23824	9.2235	8.04872	9.17452	11.502
Zfp688	0.0741409	0.0208333	24	0	1.23753	12.3052	10.1171	9.45024	10.7624
Gpr17	0.0741409	0.0208333	24	15	1.23712	2.18177	2.41303	4.70054	3.39336
Raver1	0.0741409	0.0208333	24	6	1.23627	16.3036	17.2645	15.1712	14.9002
Pip5k1c	0.0741409	0.0208333	24	0	1.23548	6.69953	5.14248	4.55006	6.48748
1700040I03Rik	0.0741409	0.0208333	24	15	1.23528	4.72646	5.03445	7.22091	6.03389
Gcc2	0.0741409	0.0208333	24	0	1.2334	9.24408	7.86703	6.57766	8.68919
Usp37	0.0741409	0.0208333	24	6	1.23033	25.1149	26.4267	24.2938	23.7679
Hnrnpd	0.0741409	0.0208333	24	6	1.22887	6.45605	7.0134	5.44437	4.54932
Fbxo8	0.0741409	0.0208333	24	0	1.2275	13.7525	12.5952	11.0659	13.3814
Pmepa1	0.0741409	0.0208333	24	18	1.22725	4.7804	4.07892	5.75531	6.57519
Epsti1	0.0741409	0.0208333	24	0	1.22655	29.5009	28.2189	26.5239	28.7111
Tcea1	0.0741409	0.0208333	24	3	1.22634	17.2844	16.2493	14.9039	15.1612
Zfand5	0.0741409	0.0208333	24	0	1.22465	6.68681	4.89781	4.58682	6.26164
Arhgap21	0.0741409	0.0208333	24	15	1.22354	5.73665	6.16521	8.08747	7.27508
Zkscan14	0.0741409	0.0208333	24	21	1.22071	8.49531	6.54703	7.23217	8.73659
Dync1i2	0.0741409	0.0208333	24	21	1.21736	34.169	32.1956	33.9042	35.374
Wdyhv1	0.0741409	0.0208333	24	18	1.21662	8.08291	6.69611	8.6346	9.58555
Dlgap4	0.0741409	0.0208333	24	15	1.21425	8.11551	9.061	10.9191	9.69184
Mx1	0.0741409	0.0208333	24	15	1.21385	3.18395	3.39259	5.32207	4.68776
Slc26a11	0.0741409	0.0208333	24	6	1.21228	4.8646	6.3988	4.69158	3.14298
B3gnt2	0.0741409	0.0208333	24	18	1.21014	11.3771	10.231	11.7129	13.318
Tk1	0.0741409	0.0208333	24	9	1.20951	2.51128	4.66578	3.71772	2.45121
Tbc1d9b	0.0741409	0.0208333	24	21	1.20933	12.7219	11.0736	12.3068	14.079
Gas2l3	0.0741409	0.0208333	24	12	1.20909	0.916315	2.5178	3.8031	1.98477
Itgb4	0.0741409	0.0208333	24	15	1.20661	38.3717	39.3733	48.7039	39.5093
Brd1	0.0741409	0.0208333	24	18	1.2053	12.3463	11.0914	12.5938	14.253
Ptges3	0.0741409	0.0208333	24	9	1.20183	22.6653	23.7984	23.5503	17.8564
Mmp15	0.0741409	0.0208333	24	18	1.20152	12.0475	7.83872	12.7904	13.1803
Men1	0.0741409	0.0208333	24	18	1.20092	8.28923	6.85466	8.83941	9.7012
Cnot1	0.0741409	0.0208333	24	0	1.1984	16.2913	14.3263	13.7878	15.2124
1500001M20Rik	0.0741409	0.0208333	24	6	1.19527	4.85972	5.17642	3.73378	2.92163
Ap2a1	0.0741409	0.0208333	24	18	1.19448	17.0286	16.6335	18.4116	18.629
2010305A19Rik	0.0741409	0.0208333	24	6	1.19405	5.42715	5.58246	4.00924	3.6231
Fam59a	0.0741409	0.0208333	24	12	1.19114	5.11167	7.34469	8.46733	7.33129
Cbx3	0.0741409	0.0208333	24	3	1.19108	9.22386	8.91028	7.32829	7.43696
Pigq	0.0741409	0.0208333	24	3	1.19098	19.6693	18.533	17.2566	17.5771
Il34	0.0741409	0.0208333	24	15	1.1909	3.20515	4.76173	6.51509	4.82017
Nop2	0.0741409	0.0208333	24	15	1.19075	5.7752	6.96511	8.84642	7.26185
Gas5	0.0741409	0.0208333	24	9	1.19068	6.52342	8.75015	7.23031	6.08929
Sla2	0.0741409	0.0208333	24	9	1.19048	12.9016	14.024	13.2461	10.4549
Lrp5	0.0741409	0.0208333	24	18	1.18911	10.5	10.1394	11.2605	13.0331
Vps33b	0.0741409	0.0208333	24	3	1.18843	13.8278	12.5465	11.0938	11.9191
Vps11	0.0741409	0.0208333	24	9	1.18483	11.6675	13.6745	11.8259	10.4817
Tmx1	0.0741409	0.0208333	24	9	1.1837	11.0244	12.8965	11.5669	10.091
Mat2b	0.0741409	0.0208333	24	0	1.18317	35.5839	29.5876	29.3484	30.4639
Rapgef1	0.0741409	0.0208333	24	9	1.17885	5.87501	7.74202	6.9359	5.46861
Snx2	0.0741409	0.0208333	24	6	1.17871	23.3282	23.5675	22.4562	20.0047
Cops2	0.0741409	0.0208333	24	3	1.17846	13.1934	11.9229	10.1312	11.6519
Hsdl1	0.0741409	0.0208333	24	0	1.17781	9.85225	7.71604	7.44247	8.6376
Mrpl38	0.0741409	0.0208333	24	12	1.17417	8.24546	9.35248	12.2132	9.02389
Foxj3	0.0741409	0.0208333	24	12	1.17409	8.74251	10.29	10.9274	9.15406
[truncated: 21,286 more rows]

## Sheet: KO
Names	BH.Q	ADJ.P	PER	LAG	AMP	ZT2	ZT8	ZT14	ZT20
Fabp2	0.086874	0.0208333	24	9	8530.89	34595.3	48043.4	36998.7	26317.8
Reg3g	0.086874	0.0208333	24	3	5976.22	33652.7	30838.6	23297.4	24290.6
Fabp1	0.086874	0.0208333	24	6	3624.24	5520.55	6359.42	1159.72	469.363
Rbp2	0.086874	0.0208333	24	6	3547.23	7265.97	9756.71	4701.31	2288.29
Mir1982	0.086874	0.0208333	24	6	2925.45	4013.29	5383.32	1122.19	0
Crip1	0.086874	0.0208333	24	9	2395.78	15213.1	18728.1	17832.6	14571.3
Guca2b	0.086874	0.0208333	24	9	2214.98	4275.49	7401.17	7213.93	4074.69
Prap1	0.086874	0.0208333	24	6	1398.01	6375.7	6489.02	4521.01	4389.53
2210404O07Rik	0.086874	0.0208333	24	9	1097.84	3131.35	4852.45	4158.71	2774.65
Ftl1	0.086874	0.0208333	24	3	810.224	4111.75	3464.96	2567.6	2717.45
Mir762	0.086874	0.0208333	24	6	776.959	1798.98	2714.73	1509.07	807.067
Fth1	0.086874	0.0208333	24	3	736.643	4689.31	4087.05	3030.16	3662.66
Tff3	0.086874	0.0208333	24	6	736.204	11320.5	12776.5	10740.4	10626.4
2210407C18Rik	0.086874	0.0208333	24	21	526.95	1174.26	477.737	601.513	1395.43
Ada	0.086874	0.0208333	24	3	517.825	1083.84	1060.74	295.083	384.867
2200002D01Rik	0.086874	0.0208333	24	9	453.779	3025.27	3575.89	3349.77	2616.91
Slc5a1	0.086874	0.0208333	24	9	408.379	850.999	1548.41	1056.1	598.441
Upp1	0.086874	0.0208333	24	15	399.73	524.093	608.64	1196.85	1066.49
Dstn	0.086874	0.0208333	24	3	375.806	1760.94	1732.39	1087.61	1342.78
Pmp22	0.086874	0.0208333	24	12	363.11	285.079	948.801	1174.04	810.733
Tmsb10	0.086874	0.0208333	24	3	338.573	2002.11	1583.35	1264.14	1340.77
Slc13a2	0.086874	0.0208333	24	12	295.06	281.35	739.37	791.452	414.917
Atp1b1	0.086874	0.0208333	24	9	273.983	820.831	1280.83	1120.73	805.789
Fau	0.086874	0.0208333	24	6	261.842	2386.74	2508.66	2171.1	1983.7
Acsl5	0.086874	0.0208333	24	9	250.074	937.313	1268.56	1152.17	776.102
S100a10	0.086874	0.0208333	24	3	248.354	4085.95	3597.58	3363.43	3572.03
Cox6b1	0.086874	0.0208333	24	6	245.172	1736.23	1740.06	1507.17	1275.67
Tm4sf5	0.086874	0.0208333	24	6	233.967	746.654	1015.46	729.721	370.634
Lgals3	0.086874	0.0208333	24	15	215.504	685.516	700.247	1034.26	961.039
Ace	0.086874	0.0208333	24	9	213.903	311.213	644.346	416.541	144.666
Mir686	0.086874	0.0208333	24	0	199.466	337.871	21.3128	0	247.618
Prr13	0.086874	0.0208333	24	3	191.184	1092.68	955.527	664.853	842.604
Mdh1	0.086874	0.0208333	24	6	188.235	730.441	883.848	603.19	478.69
Lgals9	0.086874	0.0208333	24	0	185.279	1104.38	910.569	763.714	1093.95
Ppp1r14d	0.086874	0.0208333	24	3	183.622	1059.45	898.343	565.072	873.36
Krt18	0.086874	0.0208333	24	0	183.576	867.64	675.405	484.907	811.903
Cyp4f14	0.086874	0.0208333	24	9	178.031	884.987	1169.81	949.404	730.679
Ldha	0.086874	0.0208333	24	3	175.486	1725.48	1627.68	1278.54	1560.03
Myl6	0.086874	0.0208333	24	9	170.968	2619.27	2819.56	2663.77	2380.49
Cox5a	0.086874	0.0208333	24	6	164.298	1030.59	1075.73	868.201	773.415
Atp5g3	0.086874	0.0208333	24	6	161.716	1100.46	1303.05	1060.59	885.518
Cndp2	0.086874	0.0208333	24	9	160.907	945.597	1267.46	1069.7	917.995
Cyp3a13	0.086874	0.0208333	24	3	159.42	541.216	399.897	232.28	257.925
Ndufa4	0.086874	0.0208333	24	6	154.123	1136.19	1137.54	976.961	860.842
Ggt1	0.086874	0.0208333	24	9	153.812	700.217	951.957	838.847	655.541
Prr15	0.086874	0.0208333	24	9	152.362	295.592	518.192	392.258	183.913
Spink3	0.086874	0.0208333	24	9	150.433	1838.57	2531.35	1919.31	1777.48
Calr	0.086874	0.0208333	24	0	150.308	1202.11	889.204	770.433	912.145
Cox6a1	0.086874	0.0208333	24	6	149.564	2047.33	2103.16	1962.15	1623.67
Usmg5	0.086874	0.0208333	24	9	145.31	1322.46	1546.79	1339.55	1152.88
Ctsz	0.086874	0.0208333	24	3	143.753	578.431	536.032	341.16	366.709
Leap2	0.086874	0.0208333	24	6	143.513	319.758	371.132	227.948	57.0259
Creb3l3	0.086874	0.0208333	24	6	138.961	497.848	598.922	380.459	323.269
Chchd2	0.086874	0.0208333	24	6	138.757	559.673	594.477	388.905	372.782
Lars2	0.086874	0.0208333	24	21	137.328	1111.7	982.226	1058.64	1422.72
Dgat1	0.086874	0.0208333	24	6	137.272	590.063	721.092	540.636	382.254
Cyb5	0.086874	0.0208333	24	9	134.817	731.603	953.061	753.214	593.353
2210010C17Rik	0.086874	0.0208333	24	3	131.785	422.018	350.651	173.237	226.688
Atp5o	0.086874	0.0208333	24	6	123.719	1024.1	1194.43	981.344	887.256
Lap3	0.086874	0.0208333	24	6	123.547	376.176	605.055	332.746	259.695
Gpx4	0.086874	0.0208333	24	6	118.89	576.719	730.083	552.272	418.258
Rps27l	0.086874	0.0208333	24	0	115.123	763.636	592.211	452.628	606.819
H2-D1	0.086874	0.0208333	24	3	114.997	1701.96	1375.76	1267.34	1276.83
Cda	0.086874	0.0208333	24	6	114.531	228.419	273.208	103.912	73.7719
Sult2b1	0.086874	0.0208333	24	12	114.25	193.999	359.362	405.546	247.761
Gpd1	0.086874	0.0208333	24	6	113.955	387.876	615.79	353.083	280.438
B3gnt7	0.086874	0.0208333	24	0	112.354	246.868	74.9696	28.218	174.104
Tmbim6	0.086874	0.0208333	24	6	111.91	1452.75	1771.85	1350.61	1347.24
Slc27a4	0.086874	0.0208333	24	9	111.426	522.755	638.269	549.011	349.364
Vnn1	0.086874	0.0208333	24	3	110.707	332.178	229.432	106.983	141.499
Zg16	0.086874	0.0208333	24	15	110.181	3689.03	3772.56	5808.91	3792.91
Calm1	0.086874	0.0208333	24	9	107.644	1015.48	1353.1	1097.62	996.132
Ndufa3	0.086874	0.0208333	24	6	107.17	927.251	942.065	835.514	730.68
Dad1	0.086874	0.0208333	24	3	106.018	496.247	407.396	282.71	321.07
1810065E05Rik	0.086874	0.0208333	24	21	104.615	267.429	168.797	244.057	733.679
1600029D21Rik	0.086874	0.0208333	24	0	103.971	215.891	89.8555	41.8248	209.863
Agr2	0.086874	0.0208333	24	0	101.594	1654.61	1498.51	1457.46	1588.71
Sdhd	0.086874	0.0208333	24	6	99.4037	361.142	387.413	251.285	216.114
Me2	0.086874	0.0208333	24	12	97.487	236.061	390.267	395.856	274.327
Aprt	0.086874	0.0208333	24	6	95.9933	451.036	493.789	348.623	324.692
Clic1	0.086874	0.0208333	24	6	95.6938	412.803	465.093	311.617	295.616
Uqcrb	0.086874	0.0208333	24	6	94.9885	871.486	879.802	790.246	681.127
Mgst3	0.086874	0.0208333	24	12	91.1372	569.148	687.943	730.038	591.058
Cdkn1a	0.086874	0.0208333	24	6	89.3981	325.265	483.528	319.239	236.698
Arf1	0.086874	0.0208333	24	6	89.1602	534.372	587.833	435.088	434.934
Gm5480	0.086874	0.0208333	24	6	83.3173	557.641	621.29	532.266	411.008
Bsg	0.086874	0.0208333	24	6	80.9588	728.442	751.781	641.594	609.643
Sod1	0.086874	0.0208333	24	6	80.8884	825.131	893.284	791.288	698.34
Pnp2	0.086874	0.0208333	24	0	79.7189	277.016	130.335	105.699	184.497
Slc15a1	0.086874	0.0208333	24	9	79.3321	155.676	252.936	228.897	101.772
Cox4i1	0.086874	0.0208333	24	6	79.1146	1468.14	1528.52	1453.93	1308.73
Atp5a1	0.086874	0.0208333	24	6	77.8535	554.724	596.667	467.125	464.063
Scin	0.086874	0.0208333	24	9	77.2677	101.155	434.13	169.918	97.0693
9130017N09Rik	0.086874	0.0208333	24	0	76.9117	555.354	442.029	424.79	529.004
Slc7a7	0.086874	0.0208333	24	9	76.3764	242.518	351.365	339.34	232.162
Rrbp1	0.086874	0.0208333	24	0	75.8584	309.153	209.596	162.674	277.677
Mir196a-1	0.086874	0.0208333	24	21	74.0627	212.038	142.211	177.869	380.503
S100a11	0.086874	0.0208333	24	18	73.2248	253.753	211.164	335.951	336.077
Bst1	0.086874	0.0208333	24	6	72.9357	174.832	194.323	92.0448	70.817
Uqcrq	0.086874	0.0208333	24	9	72.1744	1203.51	1288.1	1204.18	1084.63
Pomp	0.086874	0.0208333	24	3	71.836	452.166	404.835	307.823	345.995
Elovl1	0.086874	0.0208333	24	12	71.043	115.441	207.584	246.504	137.707
Dhcr24	0.086874	0.0208333	24	15	70.7124	200.928	280.72	380.18	301.473
Xpnpep2	0.086874	0.0208333	24	15	69.3838	133.081	205.424	290.842	243.91
Slc16a5	0.086874	0.0208333	24	9	69.3355	133.751	230.683	190.296	91.1177
Enpp7	0.086874	0.0208333	24	6	69.2473	213.466	264.808	199.521	79.4839
Cib1	0.086874	0.0208333	24	3	68.7198	594.844	588.223	458.941	529.757
Atp6v0c-ps2	0.086874	0.0208333	24	9	68.4044	419.877	523.492	449.767	359.905
Neurl3	0.086874	0.0208333	24	6	67.2437	225.966	293.237	192.099	136.91
Oit1	0.086874	0.0208333	24	0	66.776	408.385	330.289	232.334	343.109
Pnrc1	0.086874	0.0208333	24	3	65.727	215.221	214.646	88.8084	153.253
Chka	0.086874	0.0208333	24	6	65.1774	164.168	170.333	83.5004	66.651
Hint1	0.086874	0.0208333	24	12	65.1164	412.978	490.073	547.951	440.869
Xpnpep1	0.086874	0.0208333	24	9	63.9875	441.749	558.375	469.214	404.856
Uqcrc1	0.086874	0.0208333	24	6	63.1768	370.847	393.171	299.176	286.151
Slc25a45	0.086874	0.0208333	24	3	63.1757	270.799	265.737	166.48	191.368
Aldob	0.086874	0.0208333	24	6	62.5259	1938.84	2758.13	1888.12	1879.89
Tm6sf2	0.086874	0.0208333	24	6	61.0919	441.484	470.633	413.035	323.918
Gsr	0.086874	0.0208333	24	3	60.5589	211.623	152.816	94.8414	98.3113
Cox6c	0.086874	0.0208333	24	6	59.8106	1026.74	1068.57	1012.18	902.375
Acox1	0.086874	0.0208333	24	6	59.0416	365.142	412.613	316.524	294.236
Cyc1	0.086874	0.0208333	24	6	58.9724	407.967	434.987	367.997	308.158
Shfm1	0.086874	0.0208333	24	3	57.5627	441.882	424.524	350.592	353.002
Idh1	0.086874	0.0208333	24	9	57.5426	112.387	199.537	178.519	102.914
Dpep1	0.086874	0.0208333	24	12	57.1293	357.125	640.749	644.213	590.351
Gstp1	0.086874	0.0208333	24	9	56.9765	400.107	492.786	458.004	389.529
Cideb	0.086874	0.0208333	24	6	56.2839	428.287	533.551	414.854	375.222
Mosc2	0.086874	0.0208333	24	6	56.0294	238.66	299.729	190.354	185.835
Gm10768	0.086874	0.0208333	24	6	55.7479	103.664	141.387	55.1262	32.246
Spint1	0.086874	0.0208333	24	6	55.4545	457.941	594.229	412.853	405.658
Nos2	0.086874	0.0208333	24	18	54.761	104.203	87.9155	150.175	196.831
Cs	0.086874	0.0208333	24	9	54.5094	581.324	742.614	598.774	547.382
Arf5	0.086874	0.0208333	24	6	54.3104	350.273	356.019	300.077	252.602
Anks4b	0.086874	0.0208333	24	9	54.1304	152.513	249.78	176.704	120.867
Ifrd1	0.086874	0.0208333	24	6	53.4897	111.359	183.369	63.2016	60.9284
Fis1	0.086874	0.0208333	24	9	52.9259	296.972	397.767	307.059	257.16
Serpinb1a	0.086874	0.0208333	24	18	52.8159	549.81	510.425	564.486	645.135
Atp5b	0.086874	0.0208333	24	6	51.983	1143.55	1342.44	1096	1094.54
Copz1	0.086874	0.0208333	24	3	51.6485	292.248	263.392	200.133	209.423
Soat2	0.086874	0.0208333	24	6	51.6124	205.836	209.741	142.318	127.277
Insig2	0.086874	0.0208333	24	3	51.0892	165.556	74.9321	26.7647	58.5404
Cgref1	0.086874	0.0208333	24	6	50.9516	384.286	447.168	369.087	318.254
Fam3b	0.086874	0.0208333	24	0	50.9255	336.069	251.427	246.366	305.763
Got1	0.086874	0.0208333	24	9	50.5965	100.576	180.211	139.523	76.0494
Pgd	0.086874	0.0208333	24	3	50.1788	279.673	225.676	171.846	191.576
Tmem120a	0.086874	0.0208333	24	6	49.5781	237.003	257.91	200.672	154.013
Uqcrfs1	0.086874	0.0208333	24	6	49.5544	264.705	275.768	206.756	193.556
Ms4a10	0.086874	0.0208333	24	9	49.3482	148.479	203.86	149.754	65.5571
Efna1	0.086874	0.0208333	24	3	48.973	188.013	187.273	96.3153	140.454
Tmed4	0.086874	0.0208333	24	6	48.5167	173.581	178.989	108.661	106.683
Eif6	0.086874	0.0208333	24	6	48.3788	311.115	356.204	265.837	264.646
Hspa5	0.086874	0.0208333	24	3	47.5335	595.689	484.673	439.858	463.714
Slc7a15	0.086874	0.0208333	24	12	47.1341	50.252	100.501	152.735	69.6685
Gdpd1	0.086874	0.0208333	24	3	46.9013	186.868	184.373	115.264	123.32
Ubd	0.086874	0.0208333	24	3	46.8356	791.235	398.341	354.184	376.223
Slc13a1	0.086874	0.0208333	24	12	46.6065	125.031	376.489	395.698	351.757
Id1	0.086874	0.0208333	24	6	46.5534	238.638	251.787	186.413	172.339
Aldh1b1	0.086874	0.0208333	24	12	46.4502	193.867	253.487	268.176	196.415
Dmbt1	0.086874	0.0208333	24	3	46.2554	415.054	258.046	214.436	226.769
Espn	0.086874	0.0208333	24	12	46.2077	130.737	209.573	216.855	164.996
Atpif1	0.086874	0.0208333	24	6	46.0889	742.007	784.71	722.62	673.738
Nr1d1	0.086874	0.0208333	24	6	46.0098	45.3539	144.14	42.4493	1.97543
Pnp	0.086874	0.0208333	24	3	45.8545	169.936	168.035	80.9333	126.704
Ptms	0.086874	0.0208333	24	15	45.6316	63.6298	94.5416	154.979	132.258
Cyb5b	0.086874	0.0208333	24	6	45.1958	203.315	250.143	163.973	160.704
Slc2a5	0.086874	0.0208333	24	9	45.004	29.0258	106.556	59.3833	9.6231
Bcl2l15	0.086874	0.0208333	24	9	44.8437	277.668	319.947	310.346	194.997
Ugt2b34	0.086874	0.0208333	24	9	44.7164	127.932	233.373	157.102	114.943
Gpt	0.086874	0.0208333	24	12	44.5449	293.119	364.52	379.03	324.439
Sgk1	0.086874	0.0208333	24	15	43.0903	42.8531	51.6039	121.029	95.3058
Fam102a	0.086874	0.0208333	24	12	42.8856	61.6731	102.106	163.04	82.1699
Guk1	0.086874	0.0208333	24	3	42.8153	194.358	174.508	114.977	132.789
Hsd17b6	0.086874	0.0208333	24	3	42.4606	144.809	76.6609	36.6287	40.8234
Banf1	0.086874	0.0208333	24	3	42.0485	219.962	205.01	143.148	162.893
Mtch2	0.086874	0.0208333	24	6	41.9339	187.012	195.033	134.225	129.213
Pdzk1	0.086874	0.0208333	24	6	40.3751	196.763	243.94	178.032	148.473
Txnip	0.086874	0.0208333	24	9	40.344	172.592	228.122	221.407	162.827
Aqp1	0.086874	0.0208333	24	12	40.1519	27.4516	93.4458	116.136	68.5634
Etfb	0.086874	0.0208333	24	6	40.0516	361.622	419.396	343.824	323.861
Pdia3	0.086874	0.0208333	24	0	39.9933	379.044	327.55	292.519	354.143
Clrn3	0.086874	0.0208333	24	9	39.948	135.51	196.637	172.456	120.593
Gal3st2	0.086874	0.0208333	24	6	39.5913	165.554	248.391	142.445	128.227
Ost4	0.086874	0.0208333	24	3	38.8021	470.215	455.265	353.609	433.632
Cox7b	0.086874	0.0208333	24	9	38.0575	469.019	507.567	472.142	403.047
Gprc5a	0.086874	0.0208333	24	3	37.5203	150.434	110.331	62.1184	92.5231
Btnl1	0.086874	0.0208333	24	6	37.4063	236.784	239.293	195.056	175.22
Slc43a2	0.086874	0.0208333	24	9	37.3614	98.6926	149.464	126.052	71.1495
Slc5a4b	0.086874	0.0208333	24	9	36.957	37.1727	99.5534	53.6494	11.4998
Max	0.086874	0.0208333	24	9	36.8343	117.473	180.121	155.032	113.497
Ugdh	0.086874	0.0208333	24	6	36.6911	126.198	152.233	93.3405	81.3123
Psmb3	0.086874	0.0208333	24	3	36.6087	257.715	240.232	189.686	204.716
Acaa1a	0.086874	0.0208333	24	9	36.4768	117.055	171.989	142.123	93.8851
Por	0.086874	0.0208333	24	6	36.392	169.365	201.759	162.089	106.103
Mcfd2	0.086874	0.0208333	24	6	35.9069	246.357	264.027	210.717	198.107
Gsto1	0.086874	0.0208333	24	9	35.8104	317.523	352.539	337.988	271.717
Nme7	0.086874	0.0208333	24	9	35.4219	92.7282	141.434	128.263	76.7805
Aspa	0.086874	0.0208333	24	9	35.3804	149.782	251.411	174.4	141.043
Cryl1	0.086874	0.0208333	24	9	35.0502	128.359	187.12	157.625	117.249
Sec13	0.086874	0.0208333	24	3	34.7062	231.347	201.463	157.05	177.596
Akr1c13	0.086874	0.0208333	24	9	34.4767	118.661	165.953	125.698	75.4753
Gp1bb	0.086874	0.0208333	24	9	34.4291	105.639	164.896	134.745	96.6218
Tmbim1	0.086874	0.0208333	24	3	34.3113	217.32	211.334	146.972	184.635
Areg	0.086874	0.0208333	24	6	34.2678	198.287	282.767	177.7	165.979
Sdhc	0.086874	0.0208333	24	6	34.2399	215.099	227.678	187.509	158.423
Slc3a2	0.086874	0.0208333	24	9	34.183	137.805	176.934	176.141	118.586
B4galnt1	0.086874	0.0208333	24	6	33.7258	159.082	193.618	145.533	111.776
Snora70	0.086874	0.0208333	24	18	33.6005	60.24	20.2011	67.3767	108.101
Mgst1	0.086874	0.0208333	24	15	33.484	213.233	228.969	274.051	262.858
Ahcyl2	0.086874	0.0208333	24	3	33.3548	114.563	102.877	53.6707	69.4277
Nedd8	0.086874	0.0208333	24	3	33.0894	265.503	223.699	190.702	204.909
Snora64	0.086874	0.0208333	24	21	32.9643	32.6815	0	27.4149	87.9705
Pck1	0.086874	0.0208333	24	12	32.7468	10.9224	41.7964	173.512	18.9592
Myeov2	0.086874	0.0208333	24	3	32.4845	210.772	185.515	151.683	152.724
Gm3336	0.086874	0.0208333	24	0	32.4658	120.205	83.499	60.7479	115.869
Ubxn1	0.086874	0.0208333	24	3	32.4615	178.297	175.679	108.116	147.692
Pvrl2	0.086874	0.0208333	24	3	32.4293	178.383	171.098	110.268	147.489
Gna11	0.086874	0.0208333	24	6	32.4141	285.461	335.23	275.72	253.29
Atp5g2	0.086874	0.0208333	24	6	32.0061	237.99	253.663	221.508	179.618
Tmem14c	0.086874	0.0208333	24	3	31.6925	184.367	158.144	123.375	129.496
Polr1d	0.086874	0.0208333	24	0	31.4922	158.927	102.386	90.6275	123.16
Prelid1	0.086874	0.0208333	24	9	31.4921	663.18	731.119	687.261	657.57
Mir719	0.086874	0.0208333	24	0	30.7638	74.2181	24.594	0	37.3892
Tsc22d3	0.086874	0.0208333	24	12	30.3124	34.9633	83.9484	107.564	70.8127
Atp5c1	0.086874	0.0208333	24	6	30.3123	386.098	420.013	365.429	354.946
Dgka	0.086874	0.0208333	24	12	30.0086	116.632	167.617	186.518	152.626
Sec61b	0.086874	0.0208333	24	3	29.9463	402.032	365.993	336.449	346.875
Abcc2	0.086874	0.0208333	24	6	29.679	68.432	85.2202	45.2095	24.4978
Khk	0.086874	0.0208333	24	9	29.6345	257.22	301.989	275.982	236.932
Dnpep	0.086874	0.0208333	24	6	29.6037	200.059	205.743	175.241	146.829
0610005C13Rik	0.086874	0.0208333	24	9	29.2878	20.393	66.6157	49.9139	13.2981
Tm4sf4	0.086874	0.0208333	24	9	29.2545	24.7743	77.8865	40.0053	10.3734
Stom	0.086874	0.0208333	24	0	29.1713	166.892	139.389	65.0706	157.807
Ccl5	0.086874	0.0208333	24	15	29.0494	169.914	261.496	288.884	267.479
Snora65	0.086874	0.0208333	24	12	29.0249	0	31.4588	78.6933	28.0573
Mme	0.086874	0.0208333	24	9	29	45.5083	93.7942	63.3916	29.6532
Slc22a5	0.086874	0.0208333	24	3	28.9703	142.302	105.798	73.5775	92.5821
Cops6	0.086874	0.0208333	24	3	28.7875	138.689	102.994	59.4486	100.811
Casp7	0.086874	0.0208333	24	3	28.6424	205.035	202.46	156.008	170.474
Acy1	0.086874	0.0208333	24	12	28.5862	103.323	143.423	146.439	105.685
Prdx2	0.086874	0.0208333	24	3	28.5448	241.175	220.531	186.784	194.185
Esd	0.086874	0.0208333	24	9	28.3483	171.654	215.057	175.471	138.693
1810055G02Rik	0.086874	0.0208333	24	9	28.3309	65.1323	98.5582	87.1883	40.4822
Tsc22d1	0.086874	0.0208333	24	15	28.2134	72.3364	95.687	139.918	107.905
Arpc3	0.086874	0.0208333	24	3	28.0375	363.338	358.841	296.208	336.904
Slc25a15	0.086874	0.0208333	24	9	27.9295	77.1505	122.377	107.228	73.458
Mapk13	0.086874	0.0208333	24	15	27.5079	342.42	356.493	401.17	375.547
Akr1c12	0.086874	0.0208333	24	9	27.4584	88.2023	131.813	110.177	76.1235
Kdelr1	0.086874	0.0208333	24	6	27.154	157.832	158.158	126.085	113.102
Irf1	0.086874	0.0208333	24	3	26.9609	337.287	312.566	275.394	298.202
Hsp90b1	0.086874	0.0208333	24	0	26.8305	356.207	300.126	279.729	305.025
Abhd12	0.086874	0.0208333	24	12	26.7088	100.968	145.852	146.618	115.958
Pdk2	0.086874	0.0208333	24	12	26.4045	58.406	95.136	105.847	67.8939
Angptl4	0.086874	0.0208333	24	12	26.377	76.4565	101.325	171.407	96.7869
Tnfrsf1a	0.086874	0.0208333	24	6	26.2149	160.947	185.708	138.858	133.65
Reep6	0.086874	0.0208333	24	12	25.8225	122.567	158.194	167.619	130.209
H2-DMa	0.086874	0.0208333	24	18	25.7393	51.252	29.2993	69.579	83.7739
Ucp2	0.086874	0.0208333	24	12	25.6676	91.43	127.816	160.363	124.15
Vasp	0.086874	0.0208333	24	6	25.4944	150.341	172.831	127.863	123.2
Atp6v1f	0.086874	0.0208333	24	3	25.3798	163.872	158.119	119.318	130.888
Bpnt1	0.086874	0.0208333	24	6	25.3428	82.839	95.1127	59.4631	46.8084
Id3	0.086874	0.0208333	24	3	25.3187	194.227	165.226	135.65	152.191
Oaz1	0.086874	0.0208333	24	6	25.2919	100.826	126.449	79.3527	76.386
Sord	0.086874	0.0208333	24	9	24.945	132.618	179.15	145.56	121.537
Ap1s1	0.086874	0.0208333	24	3	24.8956	132.055	115.051	87.0007	89.6899
Cyp4v3	0.086874	0.0208333	24	9	24.875	63.6071	100.574	91.0831	57.6929
Abhd6	0.086874	0.0208333	24	9	24.8513	141.213	186.96	157.297	132.754
Apoe	0.086874	0.0208333	24	12	24.8226	84.5503	141.609	157.59	134.187
Batf2	0.086874	0.0208333	24	0	24.7352	141.461	95.8439	87.4185	111.763
Hmgcl	0.086874	0.0208333	24	3	24.6992	117.71	90.0452	66.7586	68.1743
Snord22	0.086874	0.0208333	24	18	24.6566	44.9999	22.6356	56.6224	80.7526
Pfkfb4	0.086874	0.0208333	24	3	24.5699	93.7699	88.2432	48.5079	64.0109
Akr1c19	0.086874	0.0208333	24	9	24.5576	29.2995	58.315	56.9279	16.484
Pin4	0.086874	0.0208333	24	3	24.5465	210.587	177.418	143.065	175.512
Tlcd2	0.086874	0.0208333	24	3	24.4431	75.5451	70.3447	35.2963	41.458
Cdr2	0.086874	0.0208333	24	9	24.1439	62.7236	89.581	75.1103	33.6784
Hpgd	0.086874	0.0208333	24	15	24.1023	9.37824	19.7421	73.3946	32.1021
Ccng2	0.086874	0.0208333	24	9	23.5911	78.3845	121.693	92.3008	68.8835
Mkrn1	0.086874	0.0208333	24	6	23.5774	130.058	164.596	107.865	107.829
Psma7	0.086874	0.0208333	24	3	23.5654	170.71	154.614	123.72	134.951
Entpd8	0.086874	0.0208333	24	3	23.5569	194.122	172.153	147.018	152.628
Psma2	0.086874	0.0208333	24	3	23.5516	173.554	171.476	134.237	144.179
Tmem59	0.086874	0.0208333	24	12	23.4194	192.678	235.654	243.394	220.13
Atf4	0.086874	0.0208333	24	6	23.4045	255.776	342.493	255.685	233.71
Gss	0.086874	0.0208333	24	6	22.9074	96.2228	108.447	76.6746	63.2032
Ndufa1	0.086874	0.0208333	24	9	22.8689	207.081	250.975	218.159	196.598
Adap1	0.086874	0.0208333	24	9	22.8403	158.589	180.123	170.487	124.512
Ier5	0.086874	0.0208333	24	0	22.6955	81.9438	44.8535	36.4571	63.5593
Sec22b	0.086874	0.0208333	24	6	22.5607	80.5892	84.357	52.3801	48.7547
Ephx2	0.086874	0.0208333	24	15	22.5319	42.2837	59.6804	111.412	63.527
Cstb	0.086874	0.0208333	24	6	22.4972	120.099	130.213	101.441	85.2392
Mpst	0.086874	0.0208333	24	15	22.4241	32.8596	39.8294	76.2254	59.8884
Tomm22	0.086874	0.0208333	24	3	22.3796	164.211	144.816	110.99	134.738
Osgin1	0.086874	0.0208333	24	3	22.1858	122.576	117.391	84.0066	93.2095
Ddit3	0.086874	0.0208333	24	9	22.154	86.887	107.774	92.6596	49.9431
Psmb7	0.086874	0.0208333	24	3	22.0851	152.077	138.386	109.977	118.02
Vmp1	0.086874	0.0208333	24	3	21.9705	168.124	154.386	103.114	147.41
Tmem37	0.086874	0.0208333	24	18	21.9353	54.4342	37.9672	58.648	109.393
Pcyt2	0.086874	0.0208333	24	9	21.799	233.411	265.765	240.312	211.009
Morf4l2	0.086874	0.0208333	24	3	21.7079	127.116	116.158	84.5447	97.3302
Prepl	0.086874	0.0208333	24	12	21.5542	98.2806	137.914	145.503	124.172
Slc28a2	0.086874	0.0208333	24	3	21.5191	56.1628	46.1067	19.083	22.3214
Map2k2	0.086874	0.0208333	24	6	21.4678	176.349	188.986	163.295	141.32
Chmp1a	0.086874	0.0208333	24	6	21.3246	129.712	159.591	117.492	109.607
Tmed2	0.086874	0.0208333	24	3	21.2924	196.71	178.074	142.804	171.756
Fkbp8	0.086874	0.0208333	24	6	21.1556	305.968	339.165	305.736	279.56
Sdhb	0.086874	0.0208333	24	6	20.7805	279.371	311.426	275.156	256.865
Hdhd3	0.086874	0.0208333	24	0	20.7041	149.879	130.359	79.5798	138.509
Tagln2	0.086874	0.0208333	24	18	20.6887	97.447	94.0345	122.82	127.178
Ltbr	0.086874	0.0208333	24	3	20.6067	118.798	101.447	80.0659	81.8945
Aldh1a1	0.086874	0.0208333	24	12	20.5344	145.968	167.226	194.067	157.245
H2-Bl	0.086874	0.0208333	24	6	20.4204	74.1649	107.265	69.0381	54.6342
Car4	0.086874	0.0208333	24	3	20.3732	494.312	386.623	367.415	373.617
Btnl6	0.086874	0.0208333	24	6	20.2141	159.113	160.073	141.015	114.451
Ssr2	0.086874	0.0208333	24	3	20.1059	289.71	225.984	207.028	215.263
Lamb3	0.086874	0.0208333	24	15	20.0862	3.81313	18.5162	45.1385	34.0032
Casp1	0.086874	0.0208333	24	18	20.0199	90.812	79.8053	103.922	123.32
Cltb	0.086874	0.0208333	24	15	19.9001	77.9522	87.9388	125.106	97.0711
Abhd11	0.086874	0.0208333	24	0	19.8422	113.005	87.5925	79.4664	110.176
H3f3b	0.086874	0.0208333	24	6	19.7803	239.612	280.302	236.995	220.963
Ap2m1	0.086874	0.0208333	24	6	19.6487	294.815	362.115	283.915	276.29
Slc46a1	0.086874	0.0208333	24	6	19.6346	37.9912	56.607	20.0008	19.0625
Arf4	0.086874	0.0208333	24	3	19.499	136.686	129.151	98.5844	112.101
Pabpc1	0.086874	0.0208333	24	0	19.4835	133.385	113.328	95.5224	130.573
Vcp	0.086874	0.0208333	24	3	19.4224	142.156	121.628	95.3321	113.517
Higd2a	0.086874	0.0208333	24	15	19.4126	269.413	292.557	315.211	301.666
Reg3a	0.086874	0.0208333	24	0	19.3411	296.447	278.212	163.783	293.415
Rhod	0.086874	0.0208333	24	6	19.0942	95.15	105.712	77.9323	68.9231
Ybx1	0.086874	0.0208333	24	0	19.0675	237.598	219.621	181.774	223.862
Slc5a4a	0.086874	0.0208333	24	9	18.9072	8.02814	41.8998	24.7797	5.17362
Arl1	0.086874	0.0208333	24	0	18.7514	125.569	107.89	72.3156	121.12
Ano6	0.086874	0.0208333	24	9	18.722	39.1562	57.0495	42.6035	7.54294
Sfxn1	0.086874	0.0208333	24	12	18.6746	51.8647	74.3852	89.5496	59.2504
Tspan13	0.086874	0.0208333	24	9	18.6561	95.0539	128.256	111.11	91.5446
D17Wsu104e	0.086874	0.0208333	24	3	18.5927	147.072	119.698	101.073	113.109
Rpl22l1	0.086874	0.0208333	24	3	18.511	114.981	108.044	82.2004	88.4675
Smpdl3b	0.086874	0.0208333	24	3	18.4813	82.5864	80.1564	51.9083	58.5615
Epb4.1l3	0.086874	0.0208333	24	9	18.3889	47.4573	73.2696	67.6692	41.4697
Ogdh	0.086874	0.0208333	24	9	18.2943	168.273	199.208	170.93	150.121
Susd2	0.086874	0.0208333	24	12	18.2309	16.7091	43.3146	53.7391	28.7797
Slc25a4	0.086874	0.0208333	24	12	18.2247	15.9538	43.5643	53.3021	29.3654
Pdxdc1	0.086874	0.0208333	24	0	18.154	86.2134	66.6424	53.0156	84.7919
Ctsd	0.086874	0.0208333	24	6	18.0821	195.415	243.086	189.31	178.367
Jund	0.086874	0.0208333	24	12	18.0786	170.568	198.58	206.178	183.056
Acy3	0.086874	0.0208333	24	9	17.9601	53.5035	74.4403	66.6327	36.7707
G630016D24Rik	0.086874	0.0208333	24	6	17.8994	90.8784	108.645	81.5584	67.3379
Neat1	0.086874	0.0208333	24	12	17.8923	522.954	539.823	736.437	531.725
Rab8a	0.086874	0.0208333	24	6	17.8117	136.46	151.764	125.593	112.252
2310003F16Rik	0.086874	0.0208333	24	0	17.4638	159.944	114.816	111.491	127.956
Aldh3a2	0.086874	0.0208333	24	6	17.3943	62.2626	78.5725	47.6435	43.993
Ptgr1	0.086874	0.0208333	24	6	17.3456	37.3324	66.2472	36.0646	18.4541
Slc35b1	0.086874	0.0208333	24	6	17.2824	259.762	279.327	246.56	243.468
Psma6	0.086874	0.0208333	24	0	17.2601	219.202	200.381	175.524	205.522
Ugt1a6b	0.086874	0.0208333	24	9	17.2574	82.6376	98.908	85.2202	47.234
Trappc2l	0.086874	0.0208333	24	6	17.2301	82.5433	90.4042	70.9471	53.2664
Psmb2	0.086874	0.0208333	24	0	17.2028	196.166	178.155	158.002	188.648
Acot7	0.086874	0.0208333	24	15	17.1951	73.546	81.3112	114.165	89.7577
Ppap2c	0.086874	0.0208333	24	9	17.1116	206.306	232.19	210.281	187.766
Ormdl3	0.086874	0.0208333	24	9	17.0957	120.106	136.224	129.262	64.0277
D8Ertd738e	0.086874	0.0208333	24	0	17.0448	184.09	153.244	137.771	155.135
Dlst	0.086874	0.0208333	24	9	17.0395	162.498	191.277	169.671	150.255
Psma4	0.086874	0.0208333	24	3	16.8691	178.48	167.962	142.062	156.667
Anxa7	0.086874	0.0208333	24	12	16.8464	28.8119	52.6672	53.5409	29.7473
Tef	0.086874	0.0208333	24	12	16.8282	4.71755	28.1427	30.4573	6.28524
Epha1	0.086874	0.0208333	24	9	16.7732	42.9369	67.1337	55.1256	31.8805
Tmem184a	0.086874	0.0208333	24	3	16.66	71.6853	71.5918	43.4208	52.7347
Pdia6	0.086874	0.0208333	24	0	16.5057	133.379	95.0157	94.6413	110.203
Sec61a1	0.086874	0.0208333	24	3	16.4286	187.067	133.538	118.049	131.773
Timm17a	0.086874	0.0208333	24	3	16.2461	76.0652	63.0537	45.2171	47.9508
1700019G17Rik	0.086874	0.0208333	24	6	16.2039	59.6761	70.5679	45.5719	38.8405
Cidec	0.086874	0.0208333	24	6	16.1493	59.7602	66.298	48.7502	31.6308
Rab1b	0.086874	0.0208333	24	6	16.133	124.207	127.235	103.853	101.958
Cdx1	0.086874	0.0208333	24	21	16.0893	75.2718	53.227	58.374	81.8366
Pdcd6	0.086874	0.0208333	24	6	15.9735	213.963	264.652	208.04	198.903
Selk	0.086874	0.0208333	24	6	15.9612	111.867	131.451	108.59	89.583
Ceacam18	0.086874	0.0208333	24	6	15.9045	79.7394	102.432	69.1947	64.7445
Rbm3	0.086874	0.0208333	24	9	15.852	47.7833	70.2422	52.9446	30.5673
Lass2	0.086874	0.0208333	24	12	15.6567	71.6416	95.7639	103.783	83.6216
Mlx	0.086874	0.0208333	24	6	15.6317	124.307	137.019	115.629	101.484
Ociad2	0.086874	0.0208333	24	3	15.5758	53.0692	47.6408	25.931	30.7239
Zyx	0.086874	0.0208333	24	9	15.5725	105.262	129.959	112.246	92.8972
Psmb5	0.086874	0.0208333	24	3	15.4874	108.232	97.7856	73.8171	88.3955
Tmem150b	0.086874	0.0208333	24	6	15.449	85.7845	119.263	80.8715	71.219
Rhebl1	0.086874	0.0208333	24	6	15.3202	34.9507	55.078	26.4481	20.2485
Psme1	0.086874	0.0208333	24	9	15.3103	320.152	342.533	337.307	316.384
Tesk2	0.086874	0.0208333	24	9	15.1884	27.5361	51.1716	43.6661	24.3424
Ostc	0.086874	0.0208333	24	3	15.1749	187.972	145.614	131.307	134.084
1110038D17Rik	0.086874	0.0208333	24	6	15.1333	88.9143	101.166	81.8105	65.4663
Fam96a	0.086874	0.0208333	24	3	15.108	76.083	58.569	43.9724	47.9477
2310036O22Rik	0.086874	0.0208333	24	6	15.09	156.126	166.094	144.715	134.824
Ehd1	0.086874	0.0208333	24	12	15.0776	79.5457	101.369	106.435	85.6125
Igfbp7	0.086874	0.0208333	24	12	14.9929	48.1151	66.8281	84.2621	60.5688
Cyba	0.086874	0.0208333	24	18	14.8736	133.161	110.217	139.97	147.184
Brp44l	0.086874	0.0208333	24	12	14.8241	68.4881	84.5656	109.992	84.1407
Lpcat4	0.086874	0.0208333	24	0	14.8224	159.386	140.644	134.797	157.979
Sgpl1	0.086874	0.0208333	24	6	14.6753	65.3513	68.5251	53.152	39.2163
1110059E24Rik	0.086874	0.0208333	24	0	14.6621	65.046	49.2306	37.1643	62.8197
Cdc42ep2	0.086874	0.0208333	24	12	14.622	68.9406	92.9887	95.2605	77.9514
Nbl1	0.086874	0.0208333	24	15	14.6115	21.8749	32.8776	49.9204	46.1597
Ly6d	0.086874	0.0208333	24	3	14.5606	55.8686	31.5091	15.0538	31.1402
Usp2	0.086874	0.0208333	24	12	14.527	27.0429	46.6544	57.2401	35.7631
Dbp	0.086874	0.0208333	24	9	14.3943	1.00296	21.974	20.1921	0.449956
Idh3b	0.086874	0.0208333	24	3	14.3924	110.179	94.8917	81.3224	81.719
Ero1l	0.086874	0.0208333	24	3	14.2457	48.0425	41.0079	20.9341	27.8235
Tkt	0.086874	0.0208333	24	0	14.2266	196.319	182.906	159.182	191.985
Ube2l3	0.086874	0.0208333	24	3	14.2097	131.28	126.682	85.134	117.883
Hyal2	0.086874	0.0208333	24	3	14.2034	95.9428	90.0429	72.3582	73.4543
Rtkn	0.086874	0.0208333	24	12	14.1735	27.7568	43.9036	61.0764	37.1346
Myadm	0.086874	0.0208333	24	0	14.1556	45.5775	30.5469	20.1255	45.1331
Naca	0.086874	0.0208333	24	0	14.1068	200.715	180.471	173.433	193.089
Hkdc1	0.086874	0.0208333	24	6	14.075	114.949	149.827	113.574	101.679
Gzmb	0.086874	0.0208333	24	12	14.051	36.4727	56.3347	58.6882	38.808
Canx	0.086874	0.0208333	24	3	14.0446	123.667	112.427	86.9298	109.44
Rpn1	0.086874	0.0208333	24	3	14.017	103.568	80.5927	66.3195	78.1951
Pebp1	0.086874	0.0208333	24	9	14.0152	72.9641	99.1968	79.3281	65.9197
1810014F10Rik	0.086874	0.0208333	24	3	13.9763	131.322	125.042	108.298	108.535
Slc30a2	0.086874	0.0208333	24	12	13.9384	8.62987	21.7711	50.4751	15.9363
9130404H23Rik	0.086874	0.0208333	24	0	13.9332	72.0223	57.5299	39.197	64.1137
AU040320	0.086874	0.0208333	24	6	13.8838	67.6076	75.3768	55.7794	47.9358
Pdlim2	0.086874	0.0208333	24	6	13.8703	218.194	253.319	210.923	205.117
Timm13	0.086874	0.0208333	24	3	13.8445	74.1498	60.6656	47.6129	48.0382
Vipr1	0.086874	0.0208333	24	6	13.6921	54.8928	78.4795	47.3943	41.9838
Cpne8	0.086874	0.0208333	24	3	13.6528	80.6557	78.8624	58.9181	61.9841
Ccdc56	0.086874	0.0208333	24	3	13.638	223.057	185.845	172.987	184.023
Papss1	0.086874	0.0208333	24	12	13.6197	25.0394	42.7995	52.2954	31.5332
Clptm1l	0.086874	0.0208333	24	0	13.5594	84.0826	58.6467	52.1949	65.1109
Tmem179b	0.086874	0.0208333	24	21	13.5559	68.1532	48.0537	50.0563	68.2987
Agpat9	0.086874	0.0208333	24	6	13.5524	97.3812	98.1227	85.3454	68.9749
Qdpr	0.086874	0.0208333	24	12	13.5235	36.2509	59.3932	60.6446	45.5367
Adamdec1	0.086874	0.0208333	24	15	13.4293	30.8915	38.4077	59.186	48.0969
1200009I06Rik	0.086874	0.0208333	24	6	13.3449	140.58	152.935	132.559	123.211
Eif4a1	0.086874	0.0208333	24	0	13.3134	190.505	165.374	159.963	172.515
Ykt6	0.086874	0.0208333	24	3	13.295	73.0856	69.2396	48.7678	55.9536
Xbp1	0.086874	0.0208333	24	21	13.265	159.094	140.538	156.332	175.295
Crb3	0.086874	0.0208333	24	6	13.2349	138.785	164.035	131.851	126.307
Tns4	0.086874	0.0208333	24	9	13.1858	12.5085	59.674	22.8302	10.3985
Sar1b	0.086874	0.0208333	24	6	13.0822	219.943	265.807	215.59	207.609
Mtmr4	0.086874	0.0208333	24	6	13.0705	43.7588	54.3066	36.9328	24.1637
Rdh9	0.086874	0.0208333	24	6	13.0522	54.3939	75.7101	53.3574	39.8294
Fabp4	0.086874	0.0208333	24	12	12.9957	14.5371	31.7186	49.7282	30.1524
Mical1	0.086874	0.0208333	24	0	12.9926	57.4041	40.847	33.2355	53.4271
H2afv	0.086874	0.0208333	24	9	12.9434	34.1278	50.8944	49.8467	30.0037
Tollip	0.086874	0.0208333	24	6	12.8848	53.4992	66.5758	46.3523	37.2791
Rnase4	0.086874	0.0208333	24	0	12.7907	80.4679	59.4855	47.5304	62.7256
Ociad1	0.086874	0.0208333	24	0	12.7364	71.2538	48.97	44.1647	57.9048
Lpin3	0.086874	0.0208333	24	9	12.7152	47.3973	65.2169	52.7623	34.6178
Sgpp2	0.086874	0.0208333	24	21	12.7051	43.7211	28.2137	29.8011	50.2292
4930539E08Rik	0.086874	0.0208333	24	0	12.6932	45.4986	31.2985	10.4542	32.156
2400001E08Rik	0.086874	0.0208333	24	3	12.6474	95.6044	83.8002	66.7146	76.9177
Cd52	0.086874	0.0208333	24	12	12.587	28.782	40.6491	71.9672	38.2404
Nat6	0.086874	0.0208333	24	9	12.5656	29.2443	46.6863	42.6137	24.5149
Atp6v0b	0.086874	0.0208333	24	6	12.478	141.472	153.716	137.059	122.836
B4galt1	0.086874	0.0208333	24	0	12.4716	114.051	98.2631	89.3049	108.792
Psmd4	0.086874	0.0208333	24	3	12.4101	125.488	116.934	94.937	112.384
1810037I17Rik	0.086874	0.0208333	24	6	12.3603	110.622	126.191	101.377	98.9686
Fam82a2	0.086874	0.0208333	24	0	12.2852	81.4467	59.4774	58.5375	71.316
Abr	0.086874	0.0208333	24	3	12.2463	101.584	83.5433	70.4739	80.0156
Plcd1	0.086874	0.0208333	24	12	12.2306	27.2112	48.8771	51.2815	38.354
Ssr3	0.086874	0.0208333	24	3	12.2202	89.1933	68.607	56.3076	66.9288
Igsf5	0.086874	0.0208333	24	0	12.1701	98.7457	86.0987	67.3576	89.1328
Cyp27a1	0.086874	0.0208333	24	12	12.149	6.3313	17.7855	41.7119	13.896
Bfsp1	0.086874	0.0208333	24	6	12.1419	18.4003	27.6525	6.47893	5.23146
Mad2l1bp	0.086874	0.0208333	24	3	12.1412	77.8043	75.9507	50.9348	66.3575
Nqo1	0.086874	0.0208333	24	6	12.1112	34.3698	36.4162	22.6969	13.8335
Apol10a	0.086874	0.0208333	24	21	12.0626	82.1151	46.5722	80.3669	91.7396
Ift20	0.086874	0.0208333	24	0	12.0571	109.768	94.7728	86.3025	105.41
Lima1	0.086874	0.0208333	24	9	12.0292	58.9157	78.4111	64.9717	50.4435
Aamp	0.086874	0.0208333	24	3	12.0115	86.637	82.0331	59.7402	74.9563
D16H22S680E	0.086874	0.0208333	24	12	11.9998	50.4822	72.8676	76.4878	64.9326
Cox19	0.086874	0.0208333	24	6	11.9792	78.0993	79.1653	67.8712	55.4758
Mrpl20	0.086874	0.0208333	24	3	11.9676	122.192	104.93	93.6468	96.1533
B230312A22Rik	0.086874	0.0208333	24	9	11.8885	75.7145	88.652	80.235	59.5468
2310016M24Rik	0.086874	0.0208333	24	3	11.8557	160.551	156.566	138.675	144.909
Lsm4	0.086874	0.0208333	24	3	11.7887	78.8307	70.3322	56.4935	59.326
Gm6793	0.086874	0.0208333	24	0	11.7856	117.886	91.5953	82.199	93.3106
Entpd5	0.086874	0.0208333	24	6	11.7748	57.3615	67.1971	47.986	43.2685
Ifi35	0.086874	0.0208333	24	9	11.6931	128.238	149.821	133.631	122.141
Asah2	0.086874	0.0208333	24	6	11.6389	38.1507	39.6505	28.6772	7.01843
B4galt6	0.086874	0.0208333	24	9	11.6342	18.3967	37.0448	27.0093	12.7509
Dgkd	0.086874	0.0208333	24	6	11.6091	63.209	80.814	62.422	48.7656
Vwa1	0.086874	0.0208333	24	9	11.6004	13.6105	33.2051	24.4754	11.2591
Pex16	0.086874	0.0208333	24	6	11.581	69.5566	76.9884	62.6808	51.1083
Edn3	0.086874	0.0208333	24	9	11.5572	28.969	42.5486	40.9919	21.8828
Coq5	0.086874	0.0208333	24	0	11.5512	43.085	24.5452	18.0901	32.2219
Pnpo	0.086874	0.0208333	24	3	11.5336	106.615	100.405	69.4347	95.741
Mrpl34	0.086874	0.0208333	24	3	11.5101	91.4558	76.61	65.7582	67.8242
Mpnd	0.086874	0.0208333	24	12	11.4282	59.4753	70.4254	80.8706	59.497
Per2	0.086874	0.0208333	24	15	11.4089	2.97025	9.24278	30.4122	14.07
G6pdx	0.086874	0.0208333	24	6	11.3891	62.1318	67.3672	49.7503	47.5354
Tbrg1	0.086874	0.0208333	24	0	11.3805	93.6122	82.8826	68.5021	91.1963
Hbxip	0.086874	0.0208333	24	3	11.3736	71.525	70.7366	51.355	58.7373
1110007C09Rik	0.086874	0.0208333	24	12	11.3577	42.6895	56.3418	61.9481	43.476
Trim15	0.086874	0.0208333	24	6	11.2928	136.381	145.227	125.37	124.297
Clk1	0.086874	0.0208333	24	6	11.2822	77.8856	88.2155	69.1825	65.0076
Ceacam20	0.086874	0.0208333	24	0	11.2663	243.012	232.39	119.922	237.005
Tmem139	0.086874	0.0208333	24	3	11.2431	76.7265	67.1895	56.0243	56.0914
Sec11a	0.086874	0.0208333	24	0	11.2162	86.5706	67.9813	62.7552	75.89
Faah	0.086874	0.0208333	24	12	11.1892	18.92	34.1379	37.115	20.685
Sema3b	0.086874	0.0208333	24	9	11.1745	39.6595	54.3605	45.6109	28.7055
Scamp4	0.086874	0.0208333	24	0	11.1582	52.6223	39.2393	33.9258	52.103
Stx5a	0.086874	0.0208333	24	6	11.1364	68.4251	76.5704	57.2993	56.1978
Nek6	0.086874	0.0208333	24	9	11.1258	22.9218	34.0608	31.4572	11.1278
Ptp4a2	0.086874	0.0208333	24	3	11.1148	88.9123	87.4444	66.4412	78.4332
Ppib	0.086874	0.0208333	24	0	11.0676	162.601	146.719	142.971	158.393
Serp1	0.086874	0.0208333	24	3	10.9761	109.718	95.8141	81.947	92.5399
Pcyt1a	0.086874	0.0208333	24	6	10.971	43.51	52.6318	33.1512	31.9598
Gfpt1	0.086874	0.0208333	24	0	10.9219	103.522	93.2247	61.9452	97.6212
Aup1	0.086874	0.0208333	24	0	10.9037	121.122	104.589	99.3886	113.696
1700016C15Rik	0.086874	0.0208333	24	6	10.868	22.6783	37.2646	16.9946	12.2089
Slc39a14	0.086874	0.0208333	24	6	10.8643	44.4732	49.4823	34.9781	28.2486
Ufc1	0.086874	0.0208333	24	6	10.855	71.7769	77.982	67.7478	50.997
Rbm47	0.086874	0.0208333	24	6	10.8481	60.0642	72.8469	53.3811	48.847
Xdh	0.086874	0.0208333	24	0	10.8286	136.415	123.888	107.555	125.656
Fam96b	0.086874	0.0208333	24	12	10.8029	88.3494	105.438	107.971	94.5043
Cst3	0.086874	0.0208333	24	15	10.8003	128.507	133.904	150.583	142.376
Dcxr	0.086874	0.0208333	24	12	10.7417	29.1615	43.7161	47.4741	31.6465
Pdzd11	0.086874	0.0208333	24	3	10.6985	92.1992	90.4081	75.81	76.5374
Anapc13	0.086874	0.0208333	24	9	10.6607	171.893	181.944	175.628	153.135
Comt	0.086874	0.0208333	24	6	10.6527	76.9228	97.7491	74.9522	66.8793
Galnt6	0.086874	0.0208333	24	6	10.639	79.9655	91.4658	73.5578	67.7819
Ang	0.086874	0.0208333	24	0	10.5774	59.8695	33.2188	26.9633	36.9358
Tbca	0.086874	0.0208333	24	3	10.5164	205.072	192.387	182.472	184.994
Plk3	0.086874	0.0208333	24	9	10.5123	22.4274	41.6511	24.1294	13.6197
Mboat1	0.086874	0.0208333	24	0	10.5056	31.39	15.3271	13.1658	26.8171
Serinc3	0.086874	0.0208333	24	15	10.4295	88.6474	109.095	118.928	116.894
Trib3	0.086874	0.0208333	24	9	10.4006	7.51214	25.3107	17.0031	5.38425
Aimp1	0.086874	0.0208333	24	3	10.3602	51.145	45.7763	33.0602	34.5581
Ing4	0.086874	0.0208333	24	0	10.3439	62.6646	48.0713	36.816	51.4796
Nlrp9b	0.086874	0.0208333	24	0	10.3374	75.2291	65.4829	50.1736	73.7125
Hint2	0.086874	0.0208333	24	9	10.3016	57.1812	69.117	66.4015	49.2001
Hspa9	0.086874	0.0208333	24	3	10.2914	68.5831	47.4424	37.7396	39.6925
Gtpbp2	0.086874	0.0208333	24	6	10.2895	127.766	145.196	123.179	118.065
P2ry2	0.086874	0.0208333	24	12	10.2748	13.1187	23.2659	39.6119	20.6977
Tmem41b	0.086874	0.0208333	24	9	10.2248	38.1267	60.7372	46.0695	36.4295
Dcaf11	0.086874	0.0208333	24	6	10.1535	75.1011	81.826	66.2145	61.9941
Mertk	0.086874	0.0208333	24	15	10.1148	13.2456	22.242	40.7887	23.308
Pnkd	0.086874	0.0208333	24	0	10.0787	65.4154	48.8373	41.1307	53.0595
Hnrnpl	0.086874	0.0208333	24	0	10.0516	70.53	58.4261	52.164	68.4903
Psmb10	0.086874	0.0208333	24	3	10.0413	221.824	200.589	191.122	198.34
St14	0.086874	0.0208333	24	3	10.0317	182.984	175.256	150.898	173.526
Ppp4c	0.086874	0.0208333	24	3	9.99609	91.7233	88.3917	68.2641	82.2989
Insig1	0.086874	0.0208333	24	6	9.97402	65.7163	81.0444	61.2671	56.3127
Dap	0.086874	0.0208333	24	15	9.97233	62.3405	74.6253	84.0273	83.5852
Gucy2c	0.086874	0.0208333	24	9	9.96914	78.7751	106.373	87.7019	78.3029
Ndufc2	0.086874	0.0208333	24	6	9.96098	102.165	107.999	98.6077	79.2596
Bag1	0.086874	0.0208333	24	0	9.955	137.08	124.91	109.391	125.378
Prpsap1	0.086874	0.0208333	24	6	9.93347	102.84	106.935	97.1542	84.5247
Itfg3	0.086874	0.0208333	24	9	9.91505	128.312	137.66	128.812	90.989
Acp6	0.086874	0.0208333	24	6	9.90915	66.0906	69.896	56.6831	51.2762
Atp10b	0.086874	0.0208333	24	21	9.85993	28.9513	18.7158	19.6277	37.2803
Capg	0.086874	0.0208333	24	3	9.82882	51.6048	38.7534	27.5058	35.0523
Nfil3	0.086874	0.0208333	24	21	9.81315	14.6484	4.57345	6.58688	24.2677
Rpn2	0.086874	0.0208333	24	3	9.8051	140.285	128.97	115.651	125.871
Mlxipl	0.086874	0.0208333	24	0	9.62104	50.3687	39.2201	29.0869	45.1507
Sepx1	0.086874	0.0208333	24	9	9.53	80.6232	98.2296	85.0449	75.6964
Tha1	0.086874	0.0208333	24	6	9.50914	23.1893	35.1956	21.2208	10.2682
Slc2a7	0.086874	0.0208333	24	6	9.50276	15.4242	22.9751	10.1804	1.34103
1700011H14Rik	0.086874	0.0208333	24	15	9.4967	0.0853731	0.601215	22.2724	9.03895
Gm5801	0.086874	0.0208333	24	6	9.49086	54.8396	62.5168	47.0515	43.4607
Pfdn1	0.086874	0.0208333	24	3	9.4596	77.623	67.0028	52.7868	65.0832
Atf3	0.086874	0.0208333	24	9	9.43365	36.2802	48.2923	46.0587	31.3884
Sct	0.086874	0.0208333	24	12	9.39512	98.5756	114.554	122.318	111.723
Tor1a	0.086874	0.0208333	24	6	9.37698	68.7957	85.1719	66.3244	59.955
Trappc1	0.086874	0.0208333	24	3	9.36605	99.4601	96.3822	80.1103	89.2408
Btnl5	0.086874	0.0208333	24	9	9.35325	159.47	171.945	165.052	151.072
Bambi-ps1	0.086874	0.0208333	24	6	9.28573	24.0673	25.2758	12.2089	10.8702
Pold4	0.086874	0.0208333	24	3	9.26674	70.6921	61.4256	52.5815	53.3259
Tmem208	0.086874	0.0208333	24	3	9.23414	79.0604	65.7487	54.0968	64.5942
Ganab	0.086874	0.0208333	24	3	9.19624	75.5463	66.1585	55.3537	60.3402
Prodh	0.086874	0.0208333	24	12	9.18373	19.6233	28.2818	41.666	22.7085
Eif3k	0.086874	0.0208333	24	0	9.1185	166.497	146.09	140.274	148.871
Ube2v1	0.086874	0.0208333	24	3	9.10152	78.2042	65.4763	54.4775	63.46
Sys1	0.086874	0.0208333	24	3	9.06327	77.8686	75.0421	61.3451	65.9308
1700119H24Rik	0.086874	0.0208333	24	0	8.99362	28.3191	18.4857	9.61101	25.2154
Cab39	0.086874	0.0208333	24	6	8.98613	79.6671	92.0135	71.8622	71.1949
M6pr	0.086874	0.0208333	24	0	8.93843	68.9911	56.1067	49.1036	61.5009
Txn2	0.086874	0.0208333	24	3	8.92874	109.712	84.1417	75.7236	77.1646
Rps6ka1	0.086874	0.0208333	24	18	8.92782	94.2239	93.1314	101.733	110.874
Gns	0.086874	0.0208333	24	12	8.90707	67.2085	80.6572	84.124	72.3797
Pdcd5	0.086874	0.0208333	24	3	8.8779	88.9059	87.7364	73.7889	77.7429
Vegfa	0.086874	0.0208333	24	15	8.8551	120.867	128.281	137.805	136.389
Psmd2	0.086874	0.0208333	24	0	8.85418	75.5707	67.2229	50.2597	67.9686
Fdx1	0.086874	0.0208333	24	9	8.81486	32.0782	48.5335	39.7326	31.2557
Mrps18b	0.086874	0.0208333	24	0	8.81175	51.731	32.6486	31.9365	40.2443
Lipe	0.086874	0.0208333	24	6	8.72255	51.6224	72.135	49.1879	43.3987
Mocs1	0.086874	0.0208333	24	3	8.69504	34.0131	33.6427	18.4244	24.6381
Acbd4	0.086874	0.0208333	24	6	8.69289	72.7133	76.3283	67.397	57.0574
Tusc2	0.086874	0.0208333	24	3	8.6547	53.3275	45.8796	30.926	43.8019
Bcmo1	0.086874	0.0208333	24	18	8.64875	5.77106	5.75679	17.6037	18.3865
Ccdc12	0.086874	0.0208333	24	3	8.64084	92.225	80.2938	71.3174	76.7614
Sphk2	0.086874	0.0208333	24	9	8.58	34.1378	42.2271	38.1574	20.363
Nr1d2	0.086874	0.0208333	24	9	8.5708	5.30702	18.2494	12.8591	1.55959
Stt3a	0.086874	0.0208333	24	0	8.5689	68.5381	56.7971	50.5069	63.0024
Slc39a7	0.086874	0.0208333	24	0	8.54638	57.9835	39.0009	38.4368	46.4944
Tubal3	0.086874	0.0208333	24	9	8.54362	35.9489	49.5814	41.0566	30.5241
Flnb	0.086874	0.0208333	24	18	8.49847	33.5892	32.628	42.0006	48.2539
Tmem176b	0.086874	0.0208333	24	15	8.39078	63.8005	69.5164	93.4056	71.7114
Reep3	0.086874	0.0208333	24	3	8.36511	49.3327	37.025	26.5462	36.1514
Cfd	0.086874	0.0208333	24	12	8.35555	0	12.6663	19.4907	8.52393
Ptbp1	0.086874	0.0208333	24	0	8.35323	74.7633	66.8878	52.2378	71.3427
Ube2q1	0.086874	0.0208333	24	9	8.33792	48.3151	61.2313	52.9942	42.3272
Rnf5	0.086874	0.0208333	24	6	8.31063	103.134	106.983	98.4336	88.1774
Dera	0.086874	0.0208333	24	9	8.27018	62.3174	83.6836	69.174	61.3768
C530008M17Rik	0.086874	0.0208333	24	9	8.24388	21.9033	39.1684	28.4683	20.6959
Slc30a1	0.086874	0.0208333	24	18	8.20315	33.4549	22.9358	33.5122	46.0805
Yif1a	0.086874	0.0208333	24	3	8.20155	65.328	58.6047	49.668	51.0672
Sulf2	0.086874	0.0208333	24	9	8.20155	30.2674	37.9999	32.2605	16.3805
Plek2	0.086874	0.0208333	24	12	8.19158	19.1492	26.8723	40.7722	25.0064
Srsf5	0.086874	0.0208333	24	3	8.14587	199.831	182.595	174.915	181.372
Gnpda1	0.086874	0.0208333	24	6	8.12045	34.7766	44.6391	32.0963	24.3513
Os9	0.086874	0.0208333	24	9	8.11051	65.8276	78.7784	66.8553	56.8661
Crat	0.086874	0.0208333	24	12	8.10595	21.0903	29.4916	35.9089	21.3831
Psma1	0.086874	0.0208333	24	0	8.09814	116.996	109.361	81.5447	111.781
Ank3	0.086874	0.0208333	24	9	8.09543	8.13207	20.0667	17.9868	7.02409
1810046J19Rik	0.086874	0.0208333	24	3	8.0939	152.291	126.804	119.173	121.582
Erlin1	0.086874	0.0208333	24	6	8.08403	26.5229	41.7662	26.0271	18.9012
Mxi1	0.086874	0.0208333	24	9	8.07311	32.4269	40.0383	39.1705	20.56
Polr2f	0.086874	0.0208333	24	0	8.06197	97.1014	78.992	78.8191	86.42
Sectm1a	0.086874	0.0208333	24	0	8.0503	29.4558	18.8576	13.5265	25.698
Aqp3	0.086874	0.0208333	24	6	8.01961	16.6985	25.9672	16.438	3.54483
Cuta	0.086874	0.0208333	24	12	7.99915	106.876	115.087	125.902	111.488
Nop10	0.086874	0.0208333	24	0	7.98412	49.7018	40.035	36.1992	49.1149
Chmp6	0.086874	0.0208333	24	3	7.97372	65.3165	64.4314	53.3691	53.8257
Dynll2	0.086874	0.0208333	24	3	7.95972	84.6732	69.0135	61.509	64.1068
Vti1b	0.086874	0.0208333	24	9	7.93745	90.2019	99.7282	92.6941	79.7699
Cubn	0.086874	0.0208333	24	15	7.92737	13.4117	56.6704	64.1444	63.2382
Reep4	0.086874	0.0208333	24	21	7.9214	39.6096	31.2249	32.4276	46.448
Tufm	0.086874	0.0208333	24	0	7.90871	74.7459	54.013	48.2714	55.7278
Cdx2	0.086874	0.0208333	24	12	7.90835	82.3056	90.8863	102.854	89.0665
Psmd3	0.086874	0.0208333	24	3	7.90577	81.925	69.8797	60.713	68.7308
ORF61	0.086874	0.0208333	24	0	7.904	70.0547	60.7419	54.775	67.8181
Ubl5	0.086874	0.0208333	24	6	7.87406	83.1967	85.6503	75.0696	71.5062
Mrpl30	0.086874	0.0208333	24	3	7.87392	95.3152	78.8579	71.4343	73.2176
Chchd1	0.086874	0.0208333	24	0	7.87102	50.6794	36.5392	29.5817	37.7041
Klc4	0.086874	0.0208333	24	9	7.84995	156.069	211.438	161.413	154.012
Ihh	0.086874	0.0208333	24	6	7.84991	63.0245	67.5331	55.8497	52.505
Rnf208	0.086874	0.0208333	24	6	7.84901	19.2164	20.1378	9.70847	7.44539
Me1	0.086874	0.0208333	24	6	7.80973	20.1836	20.4134	11.9487	6.55905
Dab1	0.086874	0.0208333	24	3	7.80007	23.9726	18.1179	5.54008	14.4885
Tnfaip8l2	0.086874	0.0208333	24	6	7.77517	49.4431	59.2028	42.5274	42.1126
Sra1	0.086874	0.0208333	24	6	7.74317	126.879	127.649	119.063	113.564
Mrpl45	0.086874	0.0208333	24	3	7.73794	36.5614	22.5066	15.2112	21.2306
Ces1f	0.086874	0.0208333	24	3	7.69668	77.1191	64.2591	57.0026	62.0476
Atp8b1	0.086874	0.0208333	24	3	7.68024	56.1175	56.006	35.9539	48.8765
Mrpl10	0.086874	0.0208333	24	0	7.66995	52.1239	42.0399	37.8508	49.4607
Usp16	0.086874	0.0208333	24	3	7.65443	35.0911	31.897	20.3341	25.004
Rab19	0.086874	0.0208333	24	15	7.63877	14.7147	18.2822	36.9686	21.9166
Pdhb	0.086874	0.0208333	24	6	7.63025	55.7962	67.6172	55.6815	46.1503
Tbcb	0.086874	0.0208333	24	15	7.62533	65.8382	71.6124	85.4049	73.6134
Nfkbib	0.086874	0.0208333	24	3	7.61335	56.5935	51.431	37.1085	49.3822
G6pc	0.086874	0.0208333	24	15	7.61013	29.7626	36.335	47.1325	40.4898
Slc39a9	0.086874	0.0208333	24	0	7.60115	49.8397	36.7432	30.6785	39.0813
Slc35a2	0.086874	0.0208333	24	0	7.57845	36.1687	23.3192	21.0038	29.5894
Pbld2	0.086874	0.0208333	24	6	7.57587	44.8286	49.7898	40.418	32.7726
Htatip2	0.086874	0.0208333	24	3	7.5747	33.6257	33.1395	22.4357	22.905
Pxn	0.086874	0.0208333	24	0	7.55943	57.5517	49.2202	40.5367	53.5865
Acot8	0.086874	0.0208333	24	3	7.51867	63.9862	52.5806	45.4453	49.8555
Mpv17l2	0.086874	0.0208333	24	6	7.51294	42.9487	44.861	35.2004	31.3595
Eif4ebp3	0.086874	0.0208333	24	12	7.50194	28.6505	35.7234	50.8346	33.1072
Eif3i	0.086874	0.0208333	24	3	7.50163	66.6923	58.4105	51.2194	52.6656
Gpr107	0.086874	0.0208333	24	3	7.48922	40.7102	40.6452	26.8096	33.3631
2010308F09Rik	0.086874	0.0208333	24	3	7.45559	38.6162	26.0677	19.0385	19.5421
Cops5	0.086874	0.0208333	24	0	7.44064	51.5423	43.6237	36.0414	49.1681
Mpp5	0.086874	0.0208333	24	9	7.43222	21.2385	35.2276	24.7998	17.7674
Ctsc	0.086874	0.0208333	24	0	7.39895	56.7447	49.7689	36.4896	53.3821
Zdhhc7	0.086874	0.0208333	24	3	7.36073	58.4967	51.684	43.0435	46.3179
Drap1	0.086874	0.0208333	24	6	7.33432	76.5193	83.3762	76.4054	62.7455
Tmem205	0.086874	0.0208333	24	3	7.3228	78.5952	77.6399	66.1689	69.3542
Nfkbia	0.086874	0.0208333	24	3	7.29098	131.07	125.069	82.7871	124.196
Nkg7	0.086874	0.0208333	24	15	7.27889	12.9818	20.4064	28.1321	25.8439
Hnrnpab	0.086874	0.0208333	24	0	7.27217	86.3755	73.0433	69.4677	76.7043
Cyp4f40	0.086874	0.0208333	24	18	7.25979	32.8811	29.7714	37.9132	45.2731
Mcart1	0.086874	0.0208333	24	9	7.23519	30.7734	42.1299	38.5102	29.4025
Tom1l2	0.086874	0.0208333	24	9	7.22299	35.0766	53.8203	39.2122	32.4023
Erp44	0.086874	0.0208333	24	3	7.19976	51.701	45.0844	36.2117	40.2097
Cck	0.086874	0.0208333	24	6	7.18361	20.0146	23.7493	13.7758	9.66978
Ppt1	0.086874	0.0208333	24	3	7.16306	34.2074	29.5438	20.4233	23.0677
Ido1	0.086874	0.0208333	24	15	7.1498	41.6505	46.7341	66.4599	48.3914
Rer1	0.086874	0.0208333	24	3	7.14355	174.742	171.833	133.471	168.007
Zbp1	0.086874	0.0208333	24	0	7.09263	125	113.091	110.788	118.94
Cyp2j6	0.086874	0.0208333	24	12	7.07375	15.2909	29.1111	30.1796	23.5104
Chdh	0.086874	0.0208333	24	9	7.07093	31.9415	42.2301	34.357	24.646
Nuak2	0.086874	0.0208333	24	3	7.06028	84.598	80.1334	68.1209	76.641
Naga	0.086874	0.0208333	24	3	7.05551	65.2942	63.6094	50.6209	58.3267
Nat8	0.086874	0.0208333	24	9	7.05254	32.2158	40.4841	33.2825	21.6032
Immt	0.086874	0.0208333	24	3	7.05067	64.6777	62.6532	53.2638	54.1248
Commd4	0.086874	0.0208333	24	6	7.05014	59.5021	65.6064	53.9244	51.2433
Ttyh3	0.086874	0.0208333	24	15	7.04049	14.8438	20.8436	31.8554	23.7455
Il17rc	0.086874	0.0208333	24	9	7.03571	112.418	120.118	114.028	101.828
Pgk1	0.086874	0.0208333	24	3	7.02793	311.458	311.06	283.352	304.832
Ppm1b	0.086874	0.0208333	24	6	7.01747	34.4834	38.1574	29.71	23.0824
Gstt3	0.086874	0.0208333	24	3	6.99898	36.063	35.9339	23.772	28.4288
Atp6v1d	0.086874	0.0208333	24	6	6.99421	57.9115	62.5103	51.5511	49.0881
Pcbp1	0.086874	0.0208333	24	0	6.9888	95.1953	88.6062	73.2237	90.7966
2900064A13Rik	0.086874	0.0208333	24	3	6.9789	55.2376	46.8966	37.5935	44.8014
Gpx3	0.086874	0.0208333	24	15	6.95609	27.4044	30.3392	41.8827	35.5357
Rpph1	0.086874	0.0208333	24	21	6.9527	21.1613	10.9878	13.1702	22.6619
Unc93a	0.086874	0.0208333	24	6	6.95203	13.325	18.6524	8.29861	4.01549
Pgp	0.086874	0.0208333	24	21	6.94418	73.114	64.0607	67.5817	78.1695
Ugcg	0.086874	0.0208333	24	6	6.93629	42.246	63.2814	40.9595	35.7064
Hnrnpm	0.086874	0.0208333	24	0	6.91702	43.4066	30.6511	30.1393	36.9481
D17H6S53E	0.086874	0.0208333	24	3	6.88089	32.505	29.8219	19.5633	23.3015
Nsfl1c	0.086874	0.0208333	24	3	6.85395	62.0246	55.9287	43.8774	54.69
Tmem147	0.086874	0.0208333	24	3	6.85346	60.1298	47.6455	41.184	43.2725
Mgat1	0.086874	0.0208333	24	9	6.81538	61.8629	74.1727	65.045	58.078
Katna1	0.086874	0.0208333	24	3	6.78769	35.8075	35.4975	21.6619	29.408
Selenbp1	0.086874	0.0208333	24	15	6.78547	11.7567	16.0677	26.5162	20.5004
Ifitm3	0.086874	0.0208333	24	12	6.76945	35.4875	41.8698	60.6285	37.1759
Msra	0.086874	0.0208333	24	6	6.76871	58.3448	73.8538	57.4655	51.9632
Dbnl	0.086874	0.0208333	24	0	6.72791	74.9776	66.09	57.3811	67.5229
Cept1	0.086874	0.0208333	24	3	6.7213	40.4736	40.0427	25.8052	34.1367
Slc22a4	0.086874	0.0208333	24	6	6.71218	24.0753	33.5391	22.4731	16.1564
Inpp5a	0.086874	0.0208333	24	12	6.68018	19.0604	28.8972	30.5189	21.4613
Tmx2	0.086874	0.0208333	24	3	6.66851	47.197	40.1299	30.9624	37.5031
Thra	0.086874	0.0208333	24	6	6.66572	18.291	23.1734	11.4654	11.1455
Tspan31	0.086874	0.0208333	24	6	6.6509	70.0614	73.3846	62.3221	62.3123
Slc20a1	0.086874	0.0208333	24	9	6.63745	7.43783	16.5411	15.3953	5.72502
Gm1123	0.086874	0.0208333	24	15	6.60897	102.487	125.799	132.03	129.248
Chkb	0.086874	0.0208333	24	12	6.59713	78.296	85.2102	93.0428	81.2975
Dynll1	0.086874	0.0208333	24	18	6.57532	31.1329	27.2293	37.7145	39.2455
Ssu72	0.086874	0.0208333	24	3	6.55576	79.1951	76.6235	65.2723	72.0038
Casp3	0.086874	0.0208333	24	0	6.55371	28.654	18.2724	15.731	23.8861
Taz	0.086874	0.0208333	24	0	6.53165	37.0274	27.894	24.9517	34.2926
Synpo	0.086874	0.0208333	24	9	6.52681	45.5361	55.1882	47.1794	38.3709
Vim	0.086874	0.0208333	24	15	6.5208	13.854	15.5594	26.7928	21.0642
Atg4d	0.086874	0.0208333	24	6	6.48728	41.0546	47.2024	37.3258	32.5824
Med11	0.086874	0.0208333	24	6	6.48279	39.173	40.0136	33.4652	27.3853
Nmt1	0.086874	0.0208333	24	3	6.4666	64.9292	61.1244	50.5876	57.1757
2700097O09Rik	0.086874	0.0208333	24	0	6.43502	22.7167	15.6088	9.49531	20.5884
Sap30l	0.086874	0.0208333	24	9	6.43492	36.8285	47.3117	44.2144	36.4969
Ppapdc1b	0.086874	0.0208333	24	0	6.43358	34.5344	27.7028	19.6208	30.9861
Blcap	0.086874	0.0208333	24	6	6.40999	48.0074	48.0766	42.0332	33.7687
Mif4gd	0.086874	0.0208333	24	15	6.40752	24.6042	28.1928	36.2545	34.6657
Malat1	0.086874	0.0208333	24	18	6.3979	80.2313	77.5502	83.5822	96.9245
C2cd2l	0.086874	0.0208333	24	9	6.39479	50.6689	56.929	53.8503	42.0232
Smox	0.086874	0.0208333	24	0	6.38889	26.355	17.2756	16.0355	25.0266
Mat2a	0.086874	0.0208333	24	3	6.38401	38.002	34.4842	26.874	27.5555
U2af1	0.086874	0.0208333	24	18	6.37853	36.9953	29.916	41.1489	43.8036
Relb	0.086874	0.0208333	24	0	6.35855	83.1191	77.1242	65.6881	80.2617
Acta1	0.086874	0.0208333	24	21	6.35479	10.2285	4.23715	7.06608	30.472
Parp14	0.086874	0.0208333	24	0	6.35152	47.6434	36.9022	32.9664	40.19
Egln2	0.086874	0.0208333	24	6	6.34929	45.4702	45.7443	38.0704	35.1856
Arl6ip1	0.086874	0.0208333	24	3	6.33603	138.936	132.161	121.611	131.565
Dlg3	0.086874	0.0208333	24	9	6.33504	35.6244	44.5444	38.4175	29.4193
Tob2	0.086874	0.0208333	24	12	6.32449	9.04783	18.8145	19.7552	11.6335
Pmpcb	0.086874	0.0208333	24	3	6.3174	49.5087	48.0856	37.422	42.304
Plekhg2	0.086874	0.0208333	24	12	6.31164	17.4097	26.1709	32.3274	23.2366
Cfdp1	0.086874	0.0208333	24	0	6.29481	34.8814	22.9855	22.3715	28.3063
Hspa12a	0.086874	0.0208333	24	15	6.2626	10.6212	16.0278	23.8917	20.4706
Ahcy	0.086874	0.0208333	24	6	6.26246	36.7701	36.7797	30.7857	25.0512
Ext1	0.086874	0.0208333	24	0	6.26189	31.2582	21.167	19.9296	27.5497
Plekhg6	0.086874	0.0208333	24	12	6.25857	36.8166	44.6925	46.7045	36.8785
Fam125a	0.086874	0.0208333	24	6	6.24771	71.412	74.1569	68.2665	58.0541
Rabl5	0.086874	0.0208333	24	0	6.23859	82.0681	60.8974	58.9804	64.8622
Gml	0.086874	0.0208333	24	0	6.22236	30.6571	13.8009	12.0078	17.8743
Itgb4	0.086874	0.0208333	24	15	6.21335	29.4405	48.3336	54.1916	49.6787
Rpp21	0.086874	0.0208333	24	21	6.19121	52.0022	42.1901	45.7329	53.4322
Srsf2	0.086874	0.0208333	24	6	6.18361	72.8318	79.9805	71.8385	63.4839
Rhof	0.086874	0.0208333	24	6	6.17113	68.0379	70.9185	65.1003	46.9155
Eif3d	0.086874	0.0208333	24	21	6.16399	33.3544	26.486	28.9484	39.5144
Ttc36	0.086874	0.0208333	24	15	6.15731	1.76543	3.99616	14.0689	9.10819
Ddb1	0.086874	0.0208333	24	3	6.13949	48.3625	43.9846	33.6337	41.3483
Stk38	0.086874	0.0208333	24	0	6.12517	34.1344	25.347	22.1616	30.6988
Echs1	0.086874	0.0208333	24	3	6.08257	75.7709	74.0442	65.5418	67.0692
Tifa	0.086874	0.0208333	24	21	6.0685	14.8221	9.10066	9.29841	41.4216
Fam132a	0.086874	0.0208333	24	12	6.05828	14.3468	20.0586	28.2047	14.8531
Ap1b1	0.086874	0.0208333	24	3	6.05124	43.2449	40.509	31.6082	35.0302
Nat15	0.086874	0.0208333	24	15	6.05089	29.417	33.4237	40.8278	39.1274
Dctn3	0.086874	0.0208333	24	3	6.04891	83.4495	82.8353	74.3573	74.8186
Cnpy2	0.086874	0.0208333	24	3	6.01606	133.758	109.728	104.056	108.849
Fxyd3	0.086874	0.0208333	24	9	6.00896	34.1126	39.7779	35.986	23.8832
Hemt1	0.086874	0.0208333	24	0	6.00673	21.9993	8.16113	6.9203	12.5835
Calu	0.086874	0.0208333	24	3	5.99899	44.4041	34.7234	29.0675	30.6023
Aplp2	0.086874	0.0208333	24	3	5.97077	51.0409	44.1643	34.8319	43.4854
Rab25	0.086874	0.0208333	24	0	5.93842	81.3795	64.5681	60.6087	66.2075
Bhlhe40	0.086874	0.0208333	24	15	5.93195	18.8424	22.6451	30.4763	27.7893
Parp9	0.086874	0.0208333	24	21	5.92428	44.8313	34.6369	39.1841	45.7461
Pddc1	0.086874	0.0208333	24	3	5.91456	47.4622	40.9089	32.1921	39.4501
Psmc3	0.086874	0.0208333	24	6	5.90745	84.7192	86.0961	77.4225	76.684
Sec16b	0.086874	0.0208333	24	6	5.88811	26.0307	26.7851	20.1588	16.0029
Fkbp5	0.086874	0.0208333	24	15	5.88434	3.30568	4.57584	32.6294	8.85349
Eif3g	0.086874	0.0208333	24	21	5.88214	39.5979	31.6969	35.9316	44.6678
Psma3	0.086874	0.0208333	24	0	5.88002	85.8134	79.8729	71.7014	82.3921
Cpt2	0.086874	0.0208333	24	3	5.87075	129.933	114.208	108.673	112.739
Npepps	0.086874	0.0208333	24	0	5.86782	39.3189	33.1625	26.97	37.4103
Src	0.086874	0.0208333	24	9	5.86704	53.6329	63.8872	54.0406	47.7004
Ccdc58	0.086874	0.0208333	24	0	5.85378	27.1696	18.5499	14.2744	22.2117
Iscu	0.086874	0.0208333	24	3	5.85025	50.7372	47.0421	40.0336	41.1987
Aldh16a1	0.086874	0.0208333	24	6	5.84388	46.229	51.0851	40.6149	40.1702
Psmd7	0.086874	0.0208333	24	3	5.83384	50.9552	43.9223	36.7223	41.6546
Hes2	0.086874	0.0208333	24	12	5.83094	7.47424	12.9717	19.2254	8.07296
Cct2	0.086874	0.0208333	24	0	5.82214	56.7459	47.7378	44.5456	52.005
Eef1d	0.086874	0.0208333	24	3	5.81655	52.8522	44.0701	38.5862	40.9296
1300014I06Rik	0.086874	0.0208333	24	3	5.81153	32.8356	28.6753	21.928	23.1454
Itga6	0.086874	0.0208333	24	15	5.80213	20.8723	30.8371	36.3074	35.211
Dok4	0.086874	0.0208333	24	6	5.80107	68.8033	76.4771	65.6044	63.2681
Baiap2l2	0.086874	0.0208333	24	12	5.80022	85.6587	91.1272	104.335	85.8091
Eif2s3y	0.086874	0.0208333	24	3	5.79555	34.2744	29.4196	22.3327	24.969
Dgkq	0.086874	0.0208333	24	9	5.79488	42.8001	48.4763	47.5061	36.7919
Ypel5	0.086874	0.0208333	24	9	5.78859	23.4023	33.4254	24.2805	17.931
Cyb5r3	0.086874	0.0208333	24	9	5.78516	57.3407	62.795	59.6732	43.7479
Metrnl	0.086874	0.0208333	24	12	5.78194	42.525	49.5652	54.9833	45.6697
Psma5	0.086874	0.0208333	24	0	5.77042	99.6493	94.2089	77.2604	94.3616
Use1	0.086874	0.0208333	24	9	5.74545	85.7302	92.6375	86.0489	76.7056
Lcmt1	0.086874	0.0208333	24	3	5.73764	25.322	17.5981	12.1886	13.9232
Mrps34	0.086874	0.0208333	24	0	5.73506	45.5416	36.5098	36.014	43.2034
Gorasp2	0.086874	0.0208333	24	0	5.72117	69.4414	62.8884	56.6331	66.262
Sparcl1	0.086874	0.0208333	24	15	5.72028	3.86041	6.435	21.2736	9.25354
Fam36a	0.086874	0.0208333	24	3	5.70992	84.6236	78.2957	68.706	78.0632
Ccnl1	0.086874	0.0208333	24	6	5.70989	43.8597	47.5281	38.9205	36.3173
Mrps33	0.086874	0.0208333	24	3	5.70936	41.4523	40.6531	32.0621	33.8948
Psmd11	0.086874	0.0208333	24	3	5.70716	49.0936	42.6253	34.0649	41.5117
Aldh3b1	0.086874	0.0208333	24	3	5.68747	43.3787	42.4731	28.6452	38.0165
Npl	0.086874	0.0208333	24	6	5.6792	10.1424	17.2358	7.93313	3.38187
Cct8	0.086874	0.0208333	24	0	5.67238	41.9975	33.6042	33.4666	41.1172
Rbks	0.086874	0.0208333	24	6	5.66732	29.2554	35.4794	24.3728	23.9122
Tmem160	0.086874	0.0208333	24	6	5.66523	42.7261	49.899	39.2328	37.3686
Letm1	0.086874	0.0208333	24	6	5.65692	65.4916	69.6153	60.2319	58.8748
Mfsd2a	0.086874	0.0208333	24	3	5.65198	17.5494	13.7082	5.73282	9.53856
Cdc26	0.086874	0.0208333	24	3	5.63709	32.9462	27.808	20.2594	24.5507
Tmem135	0.086874	0.0208333	24	6	5.61139	14.9787	16.8905	8.10702	7.89078
Gmppa	0.086874	0.0208333	24	3	5.59908	72.2839	65.8534	58.5016	63.7991
0910001L09Rik	0.086874	0.0208333	24	9	5.59449	44.2777	53.0352	46.6846	39.6185
Ahcyl1	0.086874	0.0208333	24	6	5.57013	26.499	28.4466	19.7945	19.3964
Rbck1	0.086874	0.0208333	24	9	5.56917	58.7151	68.041	64.6443	58.2182
Deb1	0.086874	0.0208333	24	6	5.54623	32.2397	34.2951	25.7143	25.1334
Cblc	0.086874	0.0208333	24	0	5.52095	87.3803	82.1751	63.036	83.2228
Hdac1	0.086874	0.0208333	24	15	5.51893	33.1304	45.8582	51.0615	46.5282
Alas1	0.086874	0.0208333	24	0	5.50776	71.4233	64.3843	57.8742	66.4135
Hnrnpu	0.086874	0.0208333	24	21	5.50681	40.169	30.2429	35.9991	41.6486
Dohh	0.086874	0.0208333	24	3	5.502	26.3048	23.997	16.7856	17.9542
Sema4g	0.086874	0.0208333	24	0	5.49715	76.4084	69.8224	66.8318	75.7941
Gstt2	0.086874	0.0208333	24	6	5.47453	31.9952	32.259	25.184	23.5859
2010003K15Rik	0.086874	0.0208333	24	6	5.43864	31.0562	33.1851	26.3459	22.5126
Tmed7	0.086874	0.0208333	24	3	5.39915	37.7647	36.6455	26.6146	32.5245
Triap1	0.086874	0.0208333	24	3	5.3942	38.4472	37.7976	27.1076	33.3615
Nfu1	0.086874	0.0208333	24	3	5.37733	32.1126	25.3394	18.2649	23.9777
Rcbtb1	0.086874	0.0208333	24	3	5.37355	20.2267	18.1398	11.3673	11.8005
Tspan5	0.086874	0.0208333	24	9	5.34021	15.9794	29.4536	18.1817	13.1469
Chd3	0.086874	0.0208333	24	15	5.33664	19.1835	20.9178	28.6428	26.5528
2310011J03Rik	0.086874	0.0208333	24	3	5.33611	43.1272	42.365	34.2359	36.1635
Erp29	0.086874	0.0208333	24	0	5.33077	80.5355	74.8131	70.1456	79.5009
Trappc3	0.086874	0.0208333	24	6	5.32123	46.0975	52.4278	41.8805	41.0806
Azin1	0.086874	0.0208333	24	6	5.31751	42.9911	54.4348	42.0442	37.9777
Sult1d1	0.086874	0.0208333	24	9	5.29697	77.3583	86.9871	82.027	76.6737
2310030G06Rik	0.086874	0.0208333	24	3	5.29651	28.4285	21.8283	14.8132	20.4628
Zfand2b	0.086874	0.0208333	24	12	5.29262	31.2786	40.2653	43.7515	37.7684
Derl1	0.086874	0.0208333	24	3	5.27335	50.806	50.6632	42.5953	43.9586
Fam114a2	0.086874	0.0208333	24	0	5.24758	35.3741	25.5322	24.2328	29.2333
Cmtm6	0.086874	0.0208333	24	3	5.22768	47.5143	47.0666	35.8564	42.5856
Ly6c1	0.086874	0.0208333	24	12	5.21138	11.1971	18.1979	21.6939	13.9547
Mrps23	0.086874	0.0208333	24	3	5.20201	40.4188	30.6475	25.743	27.3337
Acaa2	0.086874	0.0208333	24	6	5.19624	41.4568	49.1043	39.3492	36.5147
Srf	0.086874	0.0208333	24	6	5.18447	24.4903	28.6487	19.889	18.5861
Rnf121	0.086874	0.0208333	24	3	5.16542	32.3116	31.9271	21.5764	27.4416
C1qc	0.086874	0.0208333	24	15	5.14403	21.9645	23.7518	32.2235	28.0423
Eif4a3	0.086874	0.0208333	24	18	5.13869	30.9969	28.1639	33.0087	40.9277
2900026A02Rik	0.086874	0.0208333	24	9	5.12437	50.8929	67.0166	52.7417	47.9104
Tubb2a	0.086874	0.0208333	24	15	5.12278	18.8787	26.6602	32.4105	27.6178
Tnfrsf21	0.086874	0.0208333	24	12	5.12241	4.91491	9.74436	23.0479	7.98087
Snx20	0.086874	0.0208333	24	6	5.11592	25.9847	34.4072	25.6637	20.2582
Pkig	0.086874	0.0208333	24	12	5.11302	52.5141	59.7267	60.2311	52.9819
Tmed3	0.086874	0.0208333	24	3	5.11051	42.6313	38.6807	32.6223	34.235
Gtf2f1	0.086874	0.0208333	24	3	5.10899	69.9924	67.3078	59.0768	63.773
Usp37	0.086874	0.0208333	24	9	5.09428	20.8072	28.9092	25.5023	19.1955
Mtus1	0.086874	0.0208333	24	12	5.08367	19.6434	25.5138	28.48	19.9716
Gyk	0.086874	0.0208333	24	9	5.0777	29.3657	48.961	30.7411	25.9538
Marveld2	0.086874	0.0208333	24	0	5.04673	20.1415	13.255	11.1913	18.5791
Sec24d	0.086874	0.0208333	24	6	5.0457	27.1966	30.6817	23.1341	20.4728
Atp13a1	0.086874	0.0208333	24	21	5.03881	28.0609	22.3127	22.6857	31.1894
Rdbp	0.086874	0.0208333	24	3	5.03761	71.9064	68.1641	55.6916	67.1569
Med10	0.086874	0.0208333	24	0	5.03283	44.6658	39.6486	32.4303	41.6481
Stoml2	0.086874	0.0208333	24	0	5.02145	32.1497	26.8094	19.3806	28.2431
Fam173a	0.086874	0.0208333	24	6	5.00388	58.396	59.0252	53.838	49.4301
Mapk14	0.086874	0.0208333	24	18	4.99532	17.6361	16.5048	22.3464	25.9234
Wars	0.086874	0.0208333	24	3	4.98358	53.938	47.5704	41.5024	45.9103
Coro1c	0.086874	0.0208333	24	0	4.98298	156.961	152.263	136.266	153.839
Rps4y2	0.086874	0.0208333	24	12	4.96771	35.5054	41.6727	45.0503	37.1668
Commd9	0.086874	0.0208333	24	3	4.95593	23.7916	21.5501	14.915	16.4092
0610009B22Rik	0.086874	0.0208333	24	0	4.94229	25.5039	18.9278	14.7303	22.1331
Arrb1	0.086874	0.0208333	24	21	4.93937	12.056	7.39912	8.02905	18.7675
Tmem20	0.086874	0.0208333	24	9	4.93801	47.0629	64.1479	49.97	45.3144
Map2k1	0.086874	0.0208333	24	15	4.92942	53.6178	54.6597	61.6625	60.5575
Nipa2	0.086874	0.0208333	24	6	4.92281	29.3852	33.1168	25.5057	23.0725
Mrps18a	0.086874	0.0208333	24	0	4.90842	50.1429	35.3869	34.3196	38.9473
Slc35e1	0.086874	0.0208333	24	3	4.90195	22.5662	21.0098	13.8193	15.8919
Atl2	0.086874	0.0208333	24	9	4.89307	35.9743	42.5522	39.8795	32.6177
Fzd5	0.086874	0.0208333	24	6	4.88363	17.6111	21.5411	12.7552	12.584
Ppp2cb	0.086874	0.0208333	24	3	4.87766	40.706	40.1922	31.5717	35.5304
Thoc7	0.086874	0.0208333	24	9	4.86779	61.1113	75.2446	65.5987	61.0093
Ralgds	0.086874	0.0208333	24	18	4.86691	27.6475	24.426	32.359	33.4802
Cct4	0.086874	0.0208333	24	21	4.86461	39.5153	31.9247	34.5547	40.7233
Polr2e	0.086874	0.0208333	24	0	4.86369	42.9725	35.7175	31.4129	37.9145
Srpr	0.086874	0.0208333	24	0	4.8621	47.5527	42.0938	34.6703	42.9635
2023-09-09	0.086874	0.0208333	24	3	4.86154	28.9371	28.7195	20.4584	23.4477
Tpm4	0.086874	0.0208333	24	15	4.86093	27.7158	28.5425	35.6076	34.3995
Pank3	0.086874	0.0208333	24	12	4.85754	18.0484	26.7404	28.3106	23.2634
Cox6b2	0.086874	0.0208333	24	12	4.85125	11.6091	21.736	23.9347	19.3609
Elovl6	0.086874	0.0208333	24	0	4.84746	26.5392	19.1304	17.8435	24.1454
As3mt	0.086874	0.0208333	24	9	4.84527	14.4925	21.0954	17.7235	10.6219
Setd8	0.086874	0.0208333	24	3	4.84163	50.1661	47.4059	38.6046	45.2732
Sparc	0.086874	0.0208333	24	12	4.82523	22.8429	30.9824	35.004	29.4957
Pgm2	0.086874	0.0208333	24	6	4.82448	32.3325	37.2185	30.3872	25.5181
Tgif1	0.086874	0.0208333	24	21	4.82349	15.2149	10.0673	10.6002	19.0955
Rnf10	0.086874	0.0208333	24	3	4.82028	79.7129	77.156	67.4354	75.1683
Cry1	0.086874	0.0208333	24	18	4.81005	7.82056	5.02007	9.76701	16.6785
Ltb4r2	0.086874	0.0208333	24	3	4.77534	12.5072	9.70468	3.57164	5.13353
Xkr9	0.086874	0.0208333	24	6	4.75515	15.7352	24.9444	15.4394	11.252
Eif1ad	0.086874	0.0208333	24	3	4.74801	32.2149	31.3883	24.6829	25.4909
D5Ertd579e	0.086874	0.0208333	24	9	4.71824	28.4346	32.883	31.1648	17.386
Eci2	0.086874	0.0208333	24	6	4.70194	37.8191	40.3092	33.1237	31.7055
AI314976	0.086874	0.0208333	24	3	4.69692	38.0644	28.4316	24.0033	27.8932
Map1lc3a	0.086874	0.0208333	24	15	4.69565	15.1589	22.2359	26.663	24.0439
Trappc4	0.086874	0.0208333	24	6	4.69462	60.9783	64.9494	57.0181	55.6312
Mrpl40	0.086874	0.0208333	24	0	4.68748	33.9228	23.9183	22.3758	26.7952
Gm11194	0.086874	0.0208333	24	12	4.68702	2.78031	8.89757	11.7418	4.60217
Nagk	0.086874	0.0208333	24	3	4.68133	34.0061	32.1049	25.3498	27.5204
Bax	0.086874	0.0208333	24	3	4.67518	61.2769	60.8991	50.6754	56.8691
Rab4b	0.086874	0.0208333	24	9	4.65527	47.9154	55.2251	52.9732	47.1158
Coq7	0.086874	0.0208333	24	9	4.64728	26.5351	30.9166	28.1602	16.7214
Smpd2	0.086874	0.0208333	24	15	4.63056	50.9409	53.4351	61.8553	55.6179
Ddx39	0.086874	0.0208333	24	3	4.62999	44.99	33.3923	29.0271	31.6051
Mknk2	0.086874	0.0208333	24	15	4.62953	20.9224	23.9319	30.5096	27.439
Tmem85	0.086874	0.0208333	24	3	4.62363	56.77	51.1005	43.9516	50.8413
Pdgfa	0.086874	0.0208333	24	6	4.61504	36.0763	38.9371	34.586	24.6625
Cnih4	0.086874	0.0208333	24	9	4.61221	23.271	29.2843	24.6201	17.5881
Cd47	0.086874	0.0208333	24	0	4.58725	76.5881	52.22	49.7454	54.0703
Trafd1	0.086874	0.0208333	24	9	4.57523	49.5358	55.5761	49.5778	42.6774
Mrpl21	0.086874	0.0208333	24	0	4.5684	24.7429	19.5355	13.9246	21.6386
Arhgef2	0.086874	0.0208333	24	6	4.56582	18.9937	22.2474	15.9787	12.3483
Cables1	0.086874	0.0208333	24	15	4.5633	3.60733	8.22578	12.5281	12.3878
Dolpp1	0.086874	0.0208333	24	6	4.55617	28.8628	35.4846	26.845	24.5672
5730437N04Rik	0.086874	0.0208333	24	6	4.55518	31.3226	33.5618	27.2648	24.7356
Slc9a3	0.086874	0.0208333	24	0	4.55229	15.1155	9.57189	6.29468	13.6269
Nudt1	0.086874	0.0208333	24	0	4.54831	18.5849	11.7137	8.17065	14.164
Galk1	0.086874	0.0208333	24	6	4.54738	16.4052	16.885	12.3325	8.09578
Sdccag3	0.086874	0.0208333	24	12	4.5473	47.5263	53.6578	55.8268	49.0966
Mcoln1	0.086874	0.0208333	24	12	4.54376	12.2379	21.132	23.2129	18.929
Fam136a	0.086874	0.0208333	24	0	4.54263	23.8451	15.3246	14.5964	18.9244
Sdf2	0.086874	0.0208333	24	3	4.53825	48.9751	48.8041	41.2773	43.6658
Psme3	0.086874	0.0208333	24	0	4.53683	29.6339	22.8381	22.3213	28.3576
Itpa	0.086874	0.0208333	24	0	4.5339	33.4031	27.3686	23.1817	29.971
6330578E17Rik	0.086874	0.0208333	24	0	4.53308	28.4153	22.6301	16.6684	23.7047
Acss1	0.086874	0.0208333	24	12	4.52467	13.7223	19.8189	21.337	14.6359
Nubp2	0.086874	0.0208333	24	0	4.52304	28.4823	21.6422	19.0015	24.9545
Tmem134	0.086874	0.0208333	24	9	4.51159	57.6164	62.6707	58.2188	50.5124
Gosr2	0.086874	0.0208333	24	6	4.48797	43.1407	45.6986	41.4337	34.7117
2310044G17Rik	0.086874	0.0208333	24	12	4.48643	2.96816	8.7708	10.1734	3.28649
Sumo3	0.086874	0.0208333	24	3	4.47779	40.554	35.3876	30.1387	33.1378
Gstm6	0.086874	0.0208333	24	9	4.47697	12.3154	18.4972	13.0954	6.61443
Gnl1	0.086874	0.0208333	24	12	4.46838	30.8556	36.8274	38.3236	31.6569
Cobra1	0.086874	0.0208333	24	18	4.46559	30.1228	28.3022	32.5124	39.8304
Cops4	0.086874	0.0208333	24	0	4.45364	35.1279	30.2226	26.4893	34.1808
Creg1	0.086874	0.0208333	24	3	4.45329	28.5475	27.2578	14.5905	24.3489
Tsen34	0.086874	0.0208333	24	6	4.44038	27.2973	29.623	23.4081	20.9529
Tmem111	0.086874	0.0208333	24	3	4.4308	37.2617	34.0014	27.5659	31.165
Hmg20b	0.086874	0.0208333	24	12	4.42744	57.3911	65.7044	66.8389	62.6295
Ndufa11	0.086874	0.0208333	24	6	4.42667	42.187	46.037	41.7772	33.9263
Ap1m1	0.086874	0.0208333	24	12	4.42645	13.8088	19.5239	20.7017	13.8969
Stk16	0.086874	0.0208333	24	3	4.42458	55.4321	49.9156	43.7007	49.1324
Cox15	0.086874	0.0208333	24	9	4.41616	23.2115	27.3751	24.8331	16.405
Apeh	0.086874	0.0208333	24	6	4.40591	53.7072	54.8617	48.3896	47.7175
Sec24c	0.086874	0.0208333	24	3	4.39145	73.0535	65.2442	61.1039	62.4463
Tprkb	0.086874	0.0208333	24	6	4.39138	19.4066	25.0895	18.06	14.0154
Edn2	0.086874	0.0208333	24	15	4.38604	9.40519	19.4009	23.5361	21.6999
Gm9992	0.086874	0.0208333	24	6	4.37968	9.10708	14.2189	6.74657	4.1918
Commd1	0.086874	0.0208333	24	6	4.37688	52.5755	56.1307	51.0785	45.248
Stard3	0.086874	0.0208333	24	3	4.37314	39.7601	36.3515	29.871	33.8715
Cd3g	0.086874	0.0208333	24	15	4.36939	15.7683	18.7936	25.0223	21.8981
Ppfia3	0.086874	0.0208333	24	12	4.3614	21.5356	29.1173	29.4445	24.6903
Lrrfip1	0.086874	0.0208333	24	6	4.36098	32.6422	36.7022	29.7943	27.2154
Gpr137	0.086874	0.0208333	24	21	4.35168	39.2652	32.0758	38.7691	43.8881
Xaf1	0.086874	0.0208333	24	9	4.34581	8.1249	13.968	12.9698	6.52109
Ifrd2	0.086874	0.0208333	24	6	4.33598	18.2148	22.3709	17.4124	10.9093
Lct	0.086874	0.0208333	24	6	4.33143	7.42835	10.5177	4.3619	1.33302
Mrpl43	0.086874	0.0208333	24	0	4.32718	54.2592	45.5705	42.8501	46.9298
Dnajc30	0.086874	0.0208333	24	3	4.31084	39.302	32.7905	27.4137	32.4859
Hectd3	0.086874	0.0208333	24	9	4.30557	37.3733	45.2474	39.3268	35.0229
Eif3b	0.086874	0.0208333	24	0	4.29928	39.1281	26.4818	26.4426	30.496
Dusp12	0.086874	0.0208333	24	9	4.29582	4.07349	12.1528	7.6	3.52891
Daam1	0.086874	0.0208333	24	12	4.26926	14.1445	21.7162	21.8845	17.3809
2023-03-06	0.086874	0.0208333	24	6	4.26088	27.3426	36.4805	24.9893	23.3254
Ltb4r1	0.086874	0.0208333	24	3	4.25993	12.4499	8.83703	4.58358	4.65445
Acox2	0.086874	0.0208333	24	12	4.25514	4.3892	11.0012	11.1983	5.77494
Tmem50a	0.086874	0.0208333	24	6	4.25183	60.0156	65.2929	57.6136	55.6689
Rai12	0.086874	0.0208333	24	0	4.22005	37.5969	28.9259	26.7905	30.7692
2210403K04Rik	0.086874	0.0208333	24	6	4.21878	33.9089	53.0965	32.2317	29.9314
Serping1	0.086874	0.0208333	24	12	4.16373	13.0596	17.1258	22.8479	15.1373
Avpi1	0.086874	0.0208333	24	9	4.16057	7.14031	13.8306	9.47619	4.3986
Cnksr1	0.086874	0.0208333	24	0	4.15743	39.6423	34.2622	31.7937	38.1726
Pycrl	0.086874	0.0208333	24	21	4.15637	40.3369	33.0972	36.2964	40.8127
P2rx4	0.086874	0.0208333	24	9	4.14877	32.86	43.4927	35.4953	31.5838
Usf1	0.086874	0.0208333	24	0	4.1451	31.8924	25.9538	24.197	29.9825
5730469M10Rik	0.086874	0.0208333	24	6	4.14475	11.3393	13.4536	7.65093	5.41886
Snx25	0.086874	0.0208333	24	9	4.1212	19.2601	27.1325	21.7582	17.8727
Commd6	0.086874	0.0208333	24	0	4.11522	36.0191	28.6336	26.1268	30.3809
Glrx3	0.086874	0.0208333	24	0	4.11013	26.5589	19.1366	18.1973	22.4002
Hes6	0.086874	0.0208333	24	9	4.10712	30.808	36.4761	32.548	26.5994
Ttyh1	0.086874	0.0208333	24	0	4.10296	11.4611	4.17032	2.62047	6.93462
Kbtbd11	0.086874	0.0208333	24	18	4.10136	20.2965	19.98	25.3811	26.4958
Car3	0.086874	0.0208333	24	15	4.09967	0.123999	4.98985	10.0896	6.61986
Gimap4	0.086874	0.0208333	24	15	4.09676	11.5638	15.5546	21.4743	17.2315
Cdk5rap3	0.086874	0.0208333	24	3	4.09249	40.295	34.6549	30.174	33.2006
Ubxn8	0.086874	0.0208333	24	3	4.09127	16.9592	14.7866	9.74763	10.4263
1810058I24Rik	0.086874	0.0208333	24	6	4.08938	33.5987	39.5213	30.4292	29.7432
Abhd16a	0.086874	0.0208333	24	9	4.08884	22.6846	29.5586	23.1829	18.4919
Snd1	0.086874	0.0208333	24	0	4.08846	33.5893	27.5723	22.2556	27.8025
Gstm5	0.086874	0.0208333	24	6	4.08637	20.8371	22.8365	17.284	14.8316
Crlf3	0.086874	0.0208333	24	9	4.08222	8.01738	15.4017	10.0881	5.92616
Slc38a10	0.086874	0.0208333	24	3	4.08008	34.6017	31.2478	26.2256	28.0837
Smpd3	0.086874	0.0208333	24	21	4.06512	17.1046	9.46341	13.9168	17.7735
Cyp4f13	0.086874	0.0208333	24	6	4.04578	83.7631	98.0844	83.4767	79.9487
Cebpa	0.086874	0.0208333	24	21	4.04129	14.5266	10.3079	10.6306	17.8424
Cdc42ep4	0.086874	0.0208333	24	3	4.04027	19.6491	18.2907	11.7586	14.7536
Bmp2	0.086874	0.0208333	24	12	4.03743	7.24507	11.3619	14.5682	7.26544
Lnx1	0.086874	0.0208333	24	9	4.03465	16.2032	29.123	19.1631	15.3592
Nenf	0.086874	0.0208333	24	15	4.02944	7.44891	7.49381	15.6975	11.2479
Pfkfb3	0.086874	0.0208333	24	18	4.02692	5.01245	4.5609	8.35752	21.5374
Rpl30	0.086874	0.0208333	24	12	4.01501	5.86439	9.64978	14.7264	5.99686
Gm9926	0.086874	0.0208333	24	0	4.01248	46.9614	43.1784	24.8926	44.13
Aim2	0.086874	0.0208333	24	0	4.00605	13.509	6.15818	4.57414	8.55414
Car13	0.086874	0.0208333	24	6	4.00484	25.9774	28.8538	25.078	18.2459
Spats2l	0.086874	0.0208333	24	18	3.99826	14.2312	13.2311	18.4947	20.2764
Rab9	0.086874	0.0208333	24	0	3.99689	47.2224	43.4541	30.6929	44.7408
Slc50a1	0.086874	0.0208333	24	6	3.9867	24.7373	29.2366	23.0285	19.6693
Nr1h2	0.086874	0.0208333	24	3	3.98501	63.0618	61.4227	49.6104	59.3047
Fibp	0.086874	0.0208333	24	9	3.98373	58.4209	77.2338	58.9464	55.1905
Osbpl7	0.086874	0.0208333	24	21	3.97238	15.8622	12.117	14.1945	28.8183
Spdef	0.086874	0.0208333	24	6	3.97118	25.2435	28.4045	23.1316	19.2842
Gnai3	0.086874	0.0208333	24	6	3.96485	84.7537	111.426	82.495	81.0156
H2-T3	0.086874	0.0208333	24	6	3.95488	87.3737	88.1515	83.4801	80.859
Ubap1	0.086874	0.0208333	24	6	3.94707	42.4331	47.3254	39.9306	38.6639
Mfsd7b	0.086874	0.0208333	24	9	3.94332	18.1267	22.0618	19.3881	12.1698
Gbp8	0.086874	0.0208333	24	21	3.93547	16.1972	9.22762	16.1518	20.3134
Snrpc	0.086874	0.0208333	24	3	3.9289	76.1659	73.3454	63.519	72.4617
Bin1	0.086874	0.0208333	24	6	3.91893	8.73375	11.2197	5.60463	3.26441
Rab22a	0.086874	0.0208333	24	9	3.91553	31.881	46.8502	33.2476	29.556
A130040M12Rik	0.086874	0.0208333	24	12	3.91203	12.852	17.6466	23.1493	16.879
Ier2	0.086874	0.0208333	24	3	3.91171	48.0559	41.0718	37.3838	40.2102
Pdzd3	0.086874	0.0208333	24	6	3.90928	50.2019	51.5072	45.9435	44.7085
Lrrc8d	0.086874	0.0208333	24	0	3.89655	25.0462	20.3003	16.7039	22.9791
Tmem97	0.086874	0.0208333	24	9	3.88587	31.1539	38.1519	33.6438	29.6509
Sema6d	0.086874	0.0208333	24	21	3.8611	7.4835	3.84322	5.5769	18.7786
Mbtps1	0.086874	0.0208333	24	0	3.85009	22.4209	16.0088	15.6589	20.1365
Antxr2	0.086874	0.0208333	24	21	3.84389	13.392	9.44723	13.0578	19.9852
Atf5	0.086874	0.0208333	24	12	3.83975	8.76186	14.8646	17.0073	12.2496
Rfc2	0.086874	0.0208333	24	6	3.83581	27.2585	28.8694	23.233	22.0456
Anp32a	0.086874	0.0208333	24	21	3.8066	27.6122	22.223	24.0015	29.379
Fhl1	0.086874	0.0208333	24	15	3.80171	4.4659	4.87697	10.1941	9.90163
Gps1	0.086874	0.0208333	24	0	3.79327	26.0823	19.9117	19.3884	23.9468
1110049F12Rik	0.086874	0.0208333	24	21	3.78684	25.2479	19.0191	22.3157	26.7977
Gadd45b	0.086874	0.0208333	24	18	3.78422	28.8678	25.7717	31.9415	33.4014
Cd81	0.086874	0.0208333	24	0	3.7768	59.8311	53.399	49.7699	54.0202
Zswim7	0.086874	0.0208333	24	6	3.75891	17.5918	17.6978	14.0001	10.6577
Slc2a9	0.086874	0.0208333	24	9	3.75869	11.6281	18.9465	13.0575	9.51377
Eif2s3x	0.086874	0.0208333	24	0	3.75739	21.1476	16.5662	12.1452	18.1913
Snrnp27	0.086874	0.0208333	24	3	3.75622	46.5115	36.4374	32.896	34.9524
Bcas1	0.086874	0.0208333	24	9	3.74975	18.6336	29.651	20.6658	17.1305
Gramd1b	0.086874	0.0208333	24	6	3.74506	14.9036	17.9668	12.2909	9.98687
Eef2k	0.086874	0.0208333	24	15	3.74133	5.81454	6.62429	11.5826	11.4383
Papola	0.086874	0.0208333	24	0	3.73671	24.4906	20.7077	17.1547	23.9408
0610007C21Rik	0.086874	0.0208333	24	6	3.7348	44.6724	49.9714	43.2176	40.8626
Eepd1	0.086874	0.0208333	24	6	3.7331	14.2266	21.1676	10.7629	10.707
Psmd1	0.086874	0.0208333	24	0	3.71054	30.0299	25.6671	19.8232	25.9554
S100a13	0.086874	0.0208333	24	12	3.70839	14.6786	18.1749	22.8674	15.4861
Taf9	0.086874	0.0208333	24	0	3.7069	33.7486	28.0369	25.0199	29.7929
Pigf	0.086874	0.0208333	24	0	3.70669	21.8402	18.3455	14.4076	21.4036
4933434E20Rik	0.086874	0.0208333	24	3	3.68792	26.5246	23.1657	17.6046	21.6547
Chac1	0.086874	0.0208333	24	15	3.66893	10.1026	14.7008	18.1599	17.4817
Per3	0.086874	0.0208333	24	12	3.65665	0.499314	3.94684	9.45407	1.07523
Cry2	0.086874	0.0208333	24	15	3.64983	2.74391	5.91215	11.7485	7.23085
Ssh3	0.086874	0.0208333	24	18	3.64379	25.0137	23.3319	26.7673	34.9349
Nedd9	0.086874	0.0208333	24	9	3.63494	9.6961	15.3995	13.6636	9.08585
Praf2	0.086874	0.0208333	24	0	3.62392	21.0845	15.104	11.6306	15.9001
Elovl7	0.086874	0.0208333	24	21	3.62375	18.5262	13.6079	15.3698	20.701
Insl3	0.086874	0.0208333	24	9	3.61505	18.1048	26.0287	18.8845	15.4762
Mob2	0.086874	0.0208333	24	0	3.60016	24.2147	20.7957	15.9638	22.7276
Thrsp	0.086874	0.0208333	24	12	3.59507	1.08485	6.05225	9.18301	3.98202
Ugt2b35	0.086874	0.0208333	24	6	3.5881	4.81262	8.74112	2.05127	1.35379
Leng8	0.086874	0.0208333	24	18	3.58132	19.5916	17.1785	23.3009	23.5987
Naa35	0.086874	0.0208333	24	3	3.57559	23.123	20.3503	15.4545	17.9055
Gtf2a2	0.086874	0.0208333	24	6	3.57135	27.2758	28.9235	23.4988	22.5992
Rmrp	0.086874	0.0208333	24	18	3.56587	13.005	10.9028	14.5457	19.4479
Zc3h15	0.086874	0.0208333	24	3	3.56339	52.6826	50.463	37.6502	49.323
Slc23a1	0.086874	0.0208333	24	9	3.55865	2.19406	8.71142	3.70552	0.15749
Rab43	0.086874	0.0208333	24	18	3.55664	24.3038	21.5547	27.9427	27.9755
Mrpl32	0.086874	0.0208333	24	0	3.53815	31.6973	28.3615	22.9134	31.4549
Rsc1a1	0.086874	0.0208333	24	3	3.53373	17.7449	16.7512	12.1945	12.3067
Osbpl3	0.086874	0.0208333	24	9	3.52191	5.99716	11.0561	9.95532	5.0528
2310001H17Rik	0.086874	0.0208333	24	0	3.51524	23.1535	17.5047	13.8441	18.1379
Agmat	0.086874	0.0208333	24	6	3.50852	8.7645	9.36842	5.62897	2.58036
Med21	0.086874	0.0208333	24	21	3.49509	26.1713	22.8761	25.9127	32.9778
Tuba4a	0.086874	0.0208333	24	12	3.4901	93.8223	97.1128	107.011	96.5327
Atp6v0d1	0.086874	0.0208333	24	6	3.48554	65.048	65.3816	61.685	58.886
Mad2l2	0.086874	0.0208333	24	12	3.48116	14.5866	20.2688	22.2412	18.0772
Fgfbp1	0.086874	0.0208333	24	21	3.47844	16.8915	13.612	15.6153	34.0234
Pex6	0.086874	0.0208333	24	0	3.47313	25.9358	21.4634	18.9765	24.3276
Arfgap1	0.086874	0.0208333	24	3	3.47175	29.6543	26.9222	22.4733	24.2836
H2afy	0.086874	0.0208333	24	21	3.45924	42.4679	37.325	38.6963	43.3376
Hspa4	0.086874	0.0208333	24	0	3.45676	26.1098	19.9051	19.1412	22.7137
Dnajc3	0.086874	0.0208333	24	0	3.44085	33.1312	28.6971	27.3368	32.6349
Zfp36l1	0.086874	0.0208333	24	18	3.43531	8.85523	8.67106	11.9099	15.6789
Atad1	0.086874	0.0208333	24	0	3.43131	20.0992	15.8852	12.7969	18.2881
Plbd1	0.086874	0.0208333	24	12	3.42583	20.1785	30.4269	31.3242	28.0943
Wbscr22	0.086874	0.0208333	24	0	3.40896	29.6169	22.9293	21.9553	25.1693
Arhgdib	0.086874	0.0208333	24	15	3.39503	10.6461	12.8339	16.8602	16.2224
Mfsd6l	0.086874	0.0208333	24	9	3.39116	10.8375	15.5755	14.657	9.80335
Zfand2a	0.086874	0.0208333	24	3	3.38727	11.041	10.8973	5.76181	6.59584
Gpd1l	0.086874	0.0208333	24	3	3.38535	15.4505	15.0118	8.64048	12.2466
Zswim4	0.086874	0.0208333	24	3	3.38316	10.0362	9.61873	4.1181	5.9678
Pnn	0.086874	0.0208333	24	18	3.37714	23.5459	21.5137	25.5484	29.0632
Sptlc1	0.086874	0.0208333	24	3	3.37626	23.9004	21.8808	16.4989	19.7328
Unc50	0.086874	0.0208333	24	0	3.37516	29.928	24.2236	20.997	24.839
Trappc6a	0.086874	0.0208333	24	12	3.37205	69.6755	74.5041	77.3173	72.6083
Akt1s1	0.086874	0.0208333	24	0	3.37149	23.9212	18.6944	17.6848	21.994
Abat	0.086874	0.0208333	24	12	3.36693	7.31275	12.8128	13.6798	9.65673
Sprr2a1	0.086874	0.0208333	24	0	3.36119	6.94545	3.38255	0.926428	6.87041
Atp6ap1	0.086874	0.0208333	24	3	3.35695	53.3905	51.4241	45.4112	49.9085
Rilpl2	0.086874	0.0208333	24	3	3.35611	27.6313	24.3525	20.6322	21.8591
Idh2	0.086874	0.0208333	24	12	3.35296	21.1628	24.324	33.6652	22.2351
BC006779	0.086874	0.0208333	24	0	3.34999	42.3366	33.0474	31.9239	35.0823
Cpne2	0.086874	0.0208333	24	15	3.33981	11.4638	18.9722	22.121	20.7824
Pisd-ps3	0.086874	0.0208333	24	0	3.33606	32.9607	27.1982	26.51	30.1833
Slc5a9	0.086874	0.0208333	24	3	3.3318	15.3562	12.8872	8.99061	9.82904
Sec31a	0.086874	0.0208333	24	6	3.32655	61.219	65.4642	59.2542	58.0201
Blnk	0.086874	0.0208333	24	21	3.32136	8.8906	5.75919	8.87672	16.6157
Mapkapk2	0.086874	0.0208333	24	6	3.31835	34.1074	36.6891	31.5246	29.8862
Clstn1	0.086874	0.0208333	24	18	3.30686	21.8887	19.7947	25.2994	25.7372
Carhsp1	0.086874	0.0208333	24	3	3.30173	32.0184	31.0254	25.5054	28.1997
BC030870	0.086874	0.0208333	24	0	3.29727	32.7335	29.6248	22.4317	29.7749
Irf2bp2	0.086874	0.0208333	24	18	3.29343	9.42405	9.36641	12.9636	15.1421
Prr5	0.086874	0.0208333	24	21	3.29335	19.8872	15.9044	16.8936	22.2258
Cyp2c65	0.086874	0.0208333	24	6	3.28851	16.6863	18.2611	13.6008	12.0453
Peli1	0.086874	0.0208333	24	9	3.28829	20.1551	25.5848	22.0674	18.1964
Pdcl3	0.086874	0.0208333	24	6	3.28826	38.7678	53.634	38.5292	35.6676
Srrm2	0.086874	0.0208333	24	18	3.2838	22.6105	19.858	23.6697	28.0868
Acp1	0.086874	0.0208333	24	0	3.27977	23.7148	18.6824	15.7913	20.0355
2310009A05Rik	0.086874	0.0208333	24	21	3.2738	15.5209	11.2771	12.7786	17.7945
Mrpl37	0.086874	0.0208333	24	3	3.27076	24.0356	16.952	13.8683	16.4883
Coro1a	0.086874	0.0208333	24	15	3.26825	13.7392	17.3221	22.9515	17.3538
Sec23a	0.086874	0.0208333	24	6	3.26355	30.5319	34.6057	28.908	26.9989
Psmc2	0.086874	0.0208333	24	3	3.26259	62.6579	60.4178	49.7231	59.5819
Col6a1	0.086874	0.0208333	24	15	3.25358	13.854	16.1474	19.9043	19.2996
Dom3z	0.086874	0.0208333	24	21	3.24576	31.4295	28.0951	28.8021	34.6481
Tomm20	0.086874	0.0208333	24	6	3.22982	12.4871	15.772	10.259	8.86479
Ddhd2	0.086874	0.0208333	24	9	3.22929	20.2507	24.8008	20.29	15.7063
Aip	0.086874	0.0208333	24	15	3.21889	28.1831	31.5355	36.2462	32.5768
Polr2k	0.086874	0.0208333	24	0	3.21253	29.7492	23.9097	22.0733	25.3202
Utp3	0.086874	0.0208333	24	21	3.20648	15.9341	10.884	13.0211	17.0403
Nampt	0.086874	0.0208333	24	12	3.20493	14.7323	18.5834	21.9913	16.7775
Bsdc1	0.086874	0.0208333	24	3	3.20012	31.992	30.8397	24.1445	28.9749
2310044H10Rik	0.086874	0.0208333	24	3	3.19814	35.9595	35.4757	29.4554	32.9341
Sec14l1	0.086874	0.0208333	24	12	3.19584	12.5006	15.6514	19.0677	13.1793
Yeats4	0.086874	0.0208333	24	6	3.19301	14.9456	17.6446	12.5371	11.0219
Trabd	0.086874	0.0208333	24	0	3.19227	68.2379	56.2743	53.8966	56.9063
Gdpd2	0.086874	0.0208333	24	15	3.18771	10.9155	11.4993	19.839	13.9209
Zfp954	0.086874	0.0208333	24	3	3.18458	12.8101	12.7071	8.19084	8.31901
Golga2	0.086874	0.0208333	24	3	3.17961	26.5018	24.8153	19.0363	23.2875
Marcksl1-ps4	0.086874	0.0208333	24	12	3.16463	2.25476	6.60781	7.23669	2.63881
Ablim1	0.086874	0.0208333	24	9	3.15041	12.5658	17.241	16.0352	11.7997
Got2	0.086874	0.0208333	24	3	3.14259	24.4217	21.3291	17.4953	19.3669
Apbb3	0.086874	0.0208333	24	12	3.13363	5.25825	8.97958	11.5647	6.42279
Spsb1	0.086874	0.0208333	24	12	3.13213	8.11927	14.1061	16.9547	14.0017
Slc25a25	0.086874	0.0208333	24	9	3.12704	11.5942	16.6047	14.8041	10.97
Irak4	0.086874	0.0208333	24	0	3.12241	16.444	12.3837	11.6133	16.3845
Hax1	0.086874	0.0208333	24	0	3.1223	42.4196	39.3229	33.6195	39.354
Lpgat1	0.086874	0.0208333	24	6	3.11336	30.3804	32.0493	29.114	17.8267
Rps19bp1	0.086874	0.0208333	24	21	3.11222	22.23	18.6587	19.1994	24.4308
Galns	0.086874	0.0208333	24	6	3.10954	20.8827	24.8632	17.9722	17.951
Hnrpdl	0.086874	0.0208333	24	6	3.10423	24.3362	28.0499	22.9561	20.6499
Hbs1l	0.086874	0.0208333	24	3	3.1036	27.2048	26.1203	20.6509	23.8959
Gjb3	0.086874	0.0208333	24	15	3.10359	1.84121	2.68884	14.9809	4.7673
Ptdss2	0.086874	0.0208333	24	3	3.10236	26.4048	23.4585	19.4553	21.6332
Abcb10	0.086874	0.0208333	24	12	3.10225	13.5587	17.986	21.3215	16.9743
Vopp1	0.086874	0.0208333	24	21	3.09879	14.4113	11.2968	11.7552	17.4054
Slc39a1	0.086874	0.0208333	24	0	3.09861	53.0856	50.1642	38.2889	50.2123
2310035K24Rik	0.086874	0.0208333	24	9	3.09578	22.2134	25.1744	23.6851	17.8899
Trim30d	0.086874	0.0208333	24	12	3.09148	9.94187	13.6483	16.2763	11.2387
Eif1a	0.086874	0.0208333	24	3	3.09108	40.9542	39.874	24.8073	38.0399
Gpr89	0.086874	0.0208333	24	12	3.08588	33.8277	37.5777	39.0121	34.0339
Dnajb4	0.086874	0.0208333	24	6	3.08554	11.3833	14.0122	10.341	6.32728
Rcan1	0.086874	0.0208333	24	9	3.07963	12.427	15.9212	15.765	10.5487
Gm11437	0.086874	0.0208333	24	0	3.06956	13.8737	9.68142	8.67806	13.1678
Gga1	0.086874	0.0208333	24	3	3.06824	36.5052	34.9459	30.3306	32.4422
Ttc1	0.086874	0.0208333	24	0	3.06449	23.6185	18.9144	18.1286	22.0922
Grpel1	0.086874	0.0208333	24	0	3.06244	22.7245	17.5412	14.5385	18.0171
Cdk16	0.086874	0.0208333	24	9	3.05834	50.2519	55.8197	51.4918	48.4093
Spr	0.086874	0.0208333	24	0	3.0581	31.529	24.8412	24.8289	27.7121
Dnm1	0.086874	0.0208333	24	0	3.05693	37.2389	30.5471	29.5847	32.4668
Rnf114	0.086874	0.0208333	24	6	3.05173	53.3656	62.099	51.8289	50.4884
Sprr2a2	0.086874	0.0208333	24	0	3.03877	6.1601	2.24681	0.823492	5.50514
Fam18b	0.086874	0.0208333	24	0	3.02656	18.3504	14.2337	13.787	18.2307
Eif2b2	0.086874	0.0208333	24	3	3.02606	23.641	20.5842	17.4153	18.2509
Tab2	0.086874	0.0208333	24	3	3.02543	24.948	24.2476	17.2117	22.0956
Etf1	0.086874	0.0208333	24	0	3.01662	22.473	17.7991	15.2542	19.1126
Gpsm2	0.086874	0.0208333	24	3	2.99898	17.5884	15.734	11.2332	13.6068
Endog	0.086874	0.0208333	24	12	2.99597	4.37095	7.19558	13.9997	6.59583
Als2	0.086874	0.0208333	24	6	2.99249	8.06114	11.0628	7.37483	3.28506
Ttc4	0.086874	0.0208333	24	3	2.9917	42.0941	33.0959	30.2753	32.7871
Ppp1r16a	0.086874	0.0208333	24	6	2.98979	52.8592	53.9287	51.0861	47.2454
Trak1	0.086874	0.0208333	24	15	2.98845	21.6234	23.4284	27.0906	26.4138
Map3k11	0.086874	0.0208333	24	0	2.98841	38.5694	35.7519	30.9008	37.7562
Plekhh3	0.086874	0.0208333	24	9	2.98162	13.2956	16.705	16.533	11.5091
Suds3	0.086874	0.0208333	24	3	2.97865	44.8919	40.028	37.2197	39.2536
1810008A18Rik	0.086874	0.0208333	24	0	2.97826	23.9151	19.1212	17.8942	21.5241
Prrc2a	0.086874	0.0208333	24	21	2.96964	23.0275	20.2277	21.023	27.0871
Id2	0.086874	0.0208333	24	12	2.96645	16.392	23.2265	23.3048	20.508
Fbxo9	0.086874	0.0208333	24	3	2.96635	24.9279	23.8238	15.1884	22.1312
E430018J23Rik	0.086874	0.0208333	24	6	2.9654	13.4936	15.1348	11.7058	8.53518
Tcirg1	0.086874	0.0208333	24	18	2.96356	24.285	19.7433	24.3061	28.1044
Crip2	0.086874	0.0208333	24	12	2.95435	6.85236	9.63775	16.3514	8.95382
Mrps35	0.086874	0.0208333	24	0	2.94485	20.2031	14.7643	13.2702	16.1607
Bnip3	0.086874	0.0208333	24	12	2.93111	7.09058	10.1677	15.1362	9.92289
Phc2	0.086874	0.0208333	24	6	2.92251	39.7947	41.76	38.4612	34.8274
Rsad1	0.086874	0.0208333	24	3	2.91731	8.02259	6.10549	2.91158	2.9651
Lgals1	0.086874	0.0208333	24	15	2.91618	15.4774	17.378	26.7779	18.2268
Smarce1	0.086874	0.0208333	24	0	2.91501	24.6423	21.6882	16.7653	22.0561
Rpl7l1	0.086874	0.0208333	24	0	2.9142	24.4984	20.4181	17.5124	21.6747
Mrpl14	0.086874	0.0208333	24	9	2.90409	101.781	104.519	102.916	91.8918
Foxo6	0.086874	0.0208333	24	15	2.90057	3.60225	5.96888	9.1245	8.65068
Txnl4a	0.086874	0.0208333	24	21	2.8996	27.5354	23.1086	24.4711	28.2456
B230206H07Rik	0.086874	0.0208333	24	15	2.89221	36.6581	41.9877	44.7145	42.2737
Capn2	0.086874	0.0208333	24	18	2.88858	7.01895	5.31672	9.12042	11.3854
Manbal	0.086874	0.0208333	24	6	2.88754	24.0407	25.1018	20.5486	20.4267
Ube2i	0.086874	0.0208333	24	3	2.88192	50.1997	44.6864	41.9693	42.4606
Kif21b	0.086874	0.0208333	24	15	2.87584	5.38094	6.07039	9.94582	9.63961
2310002J15Rik	0.086874	0.0208333	24	3	2.86012	5.99606	4.45234	1.07782	1.28095
BC021767	0.086874	0.0208333	24	6	2.85874	5.1103	6.77321	3.47026	0.327516
Rnf24	0.086874	0.0208333	24	3	2.8511	8.84292	7.60335	3.42661	4.95552
Pigh	0.086874	0.0208333	24	12	2.85021	12.1137	14.8009	22.5671	12.2405
Med6	0.086874	0.0208333	24	6	2.8396	23.7534	23.8967	21.2195	17.9914
Sema4b	0.086874	0.0208333	24	3	2.83921	38.5632	37.9797	32.7902	35.7222
Cdc123	0.086874	0.0208333	24	3	2.83292	36.6407	32.4359	29.765	30.7985
Dnajc8	0.086874	0.0208333	24	0	2.83239	35.2746	30.6861	28.6619	32.0846
Cops3	0.086874	0.0208333	24	3	2.832	29.3114	27.7286	22.5137	26.5162
Pa2g4	0.086874	0.0208333	24	0	2.8238	28.735	20.7546	20.6742	23.3365
Sf3a2	0.086874	0.0208333	24	18	2.82008	12.3477	10.23	12.8888	17.6964
Psmd12	0.086874	0.0208333	24	0	2.81952	33.4672	30.0246	26.0784	30.6106
BC021614	0.086874	0.0208333	24	3	2.81789	15.7576	15.3241	11.0152	12.0963
Mea1	0.086874	0.0208333	24	0	2.81711	121.046	118.39	103.712	119.644
Srsf9	0.086874	0.0208333	24	3	2.81517	22.8281	21.8434	17.9558	18.7532
Dpcd	0.086874	0.0208333	24	3	2.8145	18.7381	15.5413	12.7787	13.5401
Tfdp1	0.086874	0.0208333	24	21	2.81273	19.05	14.6912	16.9933	20.5901
Apoo	0.086874	0.0208333	24	3	2.8116	27.3699	21.9715	19.3207	19.6433
Slc12a8	0.086874	0.0208333	24	6	2.80771	15.789	18.2284	13.9464	12.1296
Ovol1	0.086874	0.0208333	24	6	2.80555	22.5546	28.8455	20.5541	19.9095
Tnfrsf12a	0.086874	0.0208333	24	0	2.80214	16.5442	13.3689	8.83075	13.5811
Mboat7	0.086874	0.0208333	24	0	2.80163	24.87	18.8806	17.3895	20.0309
Gpank1	0.086874	0.0208333	24	3	2.78985	26.6368	26.2425	20.5976	24.0065
Spsb3	0.086874	0.0208333	24	0	2.78939	27.1987	23.066	20.1138	23.8707
Ormdl2	0.086874	0.0208333	24	0	2.78254	53.3583	50.7349	42.2297	51.0198
Sertad3	0.086874	0.0208333	24	9	2.77808	17.6409	20.2601	19.5125	12.8868
Eif3l	0.086874	0.0208333	24	0	2.77596	35.8297	29.7854	27.5682	30.1854
Zmiz2	0.086874	0.0208333	24	18	2.77508	19.1686	19.0888	22.5914	23.5151
Necap1	0.086874	0.0208333	24	3	2.76755	25.3479	23.1619	18.275	22.407
Afg3l2	0.086874	0.0208333	24	6	2.7644	45.1396	46.3084	43.7021	37.3802
Rnf126	0.086874	0.0208333	24	21	2.75899	18.3276	14.5753	17.884	21.9353
Trpm5	0.086874	0.0208333	24	3	2.75764	8.95097	6.18102	3.21089	4.12131
Urgcp	0.086874	0.0208333	24	6	2.7568	22.3964	25.9935	22.0103	18.5822
Mrps10	0.086874	0.0208333	24	0	2.75676	24.6739	13.6067	13.1555	15.7546
Cant1	0.086874	0.0208333	24	6	2.75453	72.219	74.0377	71.143	67.3227
Plaur	0.086874	0.0208333	24	6	2.75275	7.16906	8.32186	3.93209	3.77288
Cyth1	0.086874	0.0208333	24	12	2.75121	12.0182	16.0192	16.1056	12.325
Mgea5	0.086874	0.0208333	24	21	2.74934	15.8051	12.9359	15.4754	20.3825
Rab18	0.086874	0.0208333	24	3	2.74817	28.7087	26.951	20.2252	26.1177
Iars2	0.086874	0.0208333	24	12	2.74014	15.4941	18.606	20.8575	16.2191
Ddr1	0.086874	0.0208333	24	21	2.73816	34.6341	30.8862	34.4116	38.4084
Nploc4	0.086874	0.0208333	24	3	2.72024	19.0825	16.3245	13.6863	14.0267
Tac2	0.086874	0.0208333	24	15	2.70888	0.518604	2.78258	7.39558	3.56746
Ptpmt1	0.086874	0.0208333	24	6	2.70726	47.9698	51.4417	46.5347	45.2195
Ccdc116	0.086874	0.0208333	24	6	2.7048	11.672	12.9973	9.06446	7.95451
1110021L09Rik	0.086874	0.0208333	24	0	2.69966	15.3966	11.5073	10.4317	14.1782
Mterfd3	0.086874	0.0208333	24	3	2.69578	11.0892	10.9135	7.07775	7.30012
Bin3	0.086874	0.0208333	24	0	2.69397	22.2707	18.065	16.3749	19.7889
Hsf1	0.086874	0.0208333	24	18	2.69365	4.97865	4.32566	7.74523	9.17787
Pdk3	0.086874	0.0208333	24	12	2.69093	12.5716	16.0506	19.5958	15.4637
Eif2b1	0.086874	0.0208333	24	0	2.6824	13.448	8.62237	8.54007	11.3014
Pex11c	0.086874	0.0208333	24	3	2.6711	25.7733	23.2371	19.4505	22.0049
Tm9sf4	0.086874	0.0208333	24	0	2.66431	21.3597	18.5145	14.0955	18.7861
Snx15	0.086874	0.0208333	24	21	2.66151	34.8989	32.3896	33.089	38.3696
Nacc1	0.086874	0.0208333	24	21	2.66017	26.1102	22.3224	22.725	26.4613
Capn9	0.086874	0.0208333	24	12	2.65825	3.97678	7.10814	9.13333	4.74602
Pak1ip1	0.086874	0.0208333	24	0	2.65787	21.5251	17.7613	15.6548	19.4086
Nfkbiz	0.086874	0.0208333	24	21	2.65515	19.7226	17.2193	18.1284	29.844
Zscan21	0.086874	0.0208333	24	21	2.64769	8.18022	4.32046	5.24951	8.87855
1500011K16Rik	0.086874	0.0208333	24	3	2.64444	20.7583	16.1062	13.3159	16.069
Derl2	0.086874	0.0208333	24	3	2.64423	22.0045	18.7575	16.2645	16.837
Muc4	0.086874	0.0208333	24	3	2.64224	10.2163	9.01921	3.77575	7.72517
Il33	0.086874	0.0208333	24	3	2.64062	6.73828	5.02772	1.83197	2.46523
Gata5	0.086874	0.0208333	24	6	2.63857	49.6061	50.6779	48.1217	44.6993
Per1	0.086874	0.0208333	24	12	2.63726	2.12408	6.29922	6.86383	3.57966
Eif2a	0.086874	0.0208333	24	0	2.63497	16.3779	13.0079	9.66307	13.7459
Gps2	0.086874	0.0208333	24	21	2.63475	33.8193	30.6046	32.713	36.9505
Bloc1s2	0.086874	0.0208333	24	3	2.63203	44.895	44.8072	30.0884	42.4135
Mmaa	0.086874	0.0208333	24	18	2.62126	8.64475	7.25781	11.347	11.9696
Limd1	0.086874	0.0208333	24	9	2.6176	32.7643	38.1093	34.5886	32.1207
Timm50	0.086874	0.0208333	24	3	2.61357	24.4526	19.5104	17.0463	17.6278
Plekha6	0.086874	0.0208333	24	21	2.60434	14.9666	12.5112	12.8724	19.8355
9430016H08Rik	0.086874	0.0208333	24	3	2.58642	15.4685	13.8654	10.6389	11.3795
Cog4	0.086874	0.0208333	24	0	2.58409	23.783	20.1383	17.7907	21.4549
Cpsf1	0.086874	0.0208333	24	21	2.58373	9.77806	7.19771	9.06406	13.7916
Pink1	0.086874	0.0208333	24	9	2.5825	30.4865	47.6288	31.0834	28.6486
Fa2h	0.086874	0.0208333	24	15	2.57714	0.71745	1.69617	4.87486	4.828
Rad23b	0.086874	0.0208333	24	0	2.57507	29.9773	27.5495	21.8458	27.9584
Atg5	0.086874	0.0208333	24	3	2.5739	19.1068	16.8385	12.7902	15.875
Evpl	0.086874	0.0208333	24	15	2.57302	8.80509	10.3501	14.5169	11.9159
Tex19.2	0.086874	0.0208333	24	3	2.5726	6.64114	3.72173	1.04689	2.03958
Dhrs7	0.086874	0.0208333	24	9	2.57119	9.11502	13.5295	11.9079	9.04995
Tmem11	0.086874	0.0208333	24	18	2.57079	15.8307	12.7579	16.3139	19.546
Tmem115	0.086874	0.0208333	24	0	2.56917	28.0021	23.7757	22.7566	25.7969
Plagl2	0.086874	0.0208333	24	21	2.56651	9.69487	6.77181	7.02177	11.3579
Tars	0.086874	0.0208333	24	0	2.56489	21.2262	18.808	15.3995	20.9831
Pigu	0.086874	0.0208333	24	0	2.56111	18.0274	15.5702	11.2324	16.0191
Sumf1	0.086874	0.0208333	24	3	2.55467	18.318	16.1551	11.9482	15.2992
Hscb	0.086874	0.0208333	24	18	2.55241	8.09864	5.10943	9.09647	11.3309
Tfeb	0.086874	0.0208333	24	15	2.55226	5.55444	8.46172	12.4801	8.75495
C1qb	0.086874	0.0208333	24	15	2.54718	20.9922	21.1188	31.7612	23.3937
Ptprcap	0.086874	0.0208333	24	12	2.54165	5.25809	9.67644	9.78973	7.01921
Tor2a	0.086874	0.0208333	24	6	2.54032	41.5947	43.7912	39.1602	39.0406
Scfd1	0.086874	0.0208333	24	3	2.53699	30.4983	29.5004	21.1311	28.1064
Dnajb6	0.086874	0.0208333	24	0	2.53466	42.526	40.0176	37.2295	41.8902
Mtx2	0.086874	0.0208333	24	0	2.53424	37.5876	26.5955	24.2693	26.6586
Magt1	0.086874	0.0208333	24	0	2.52989	31.8533	25.9441	23.9513	26.3365
Daglb	0.086874	0.0208333	24	21	2.51709	5.59074	3.07035	4.10075	8.69977
Blvrb	0.086874	0.0208333	24	3	2.51557	28.5206	27.4396	21.7306	26.1489
2610029I01Rik	0.086874	0.0208333	24	9	2.50977	28.3309	30.832	29.6445	25.0469
Apaf1	0.086874	0.0208333	24	3	2.50602	18.4682	17.3116	12.9133	15.7784
Ppap2b	0.086874	0.0208333	24	12	2.50492	5.964	8.84645	11.4951	7.29258
Lck	0.086874	0.0208333	24	15	2.49899	5.09171	6.66831	10.404	8.42424
H2-DMb2	0.086874	0.0208333	24	18	2.49839	3.96287	1.99338	6.29235	6.73041
Tbpl1	0.086874	0.0208333	24	0	2.49738	12.9959	8.3762	7.78323	10.2272
Rrp36	0.086874	0.0208333	24	0	2.49711	26.1641	23.7478	19.94	24.5866
Dpagt1	0.086874	0.0208333	24	0	2.49701	28.384	26.0298	22.3117	27.7631
Gdi1	0.086874	0.0208333	24	12	2.49393	34.2932	41.5346	42.547	40.1957
Pof1b	0.086874	0.0208333	24	9	2.49292	9.90424	16.0991	12.1356	9.78525
Egfl7	0.086874	0.0208333	24	12	2.49018	7.23147	9.76668	12.9795	8.47141
Lsm10	0.086874	0.0208333	24	9	2.48474	9.61121	12.832	12.4654	8.65827
BC003266	0.086874	0.0208333	24	15	2.48401	9.25136	11.1281	14.5932	12.8121
Hspb1	0.086874	0.0208333	24	15	2.48062	2.94366	3.90905	16.3961	5.28241
O3far1	0.086874	0.0208333	24	21	2.47804	4.5611	2.22478	3.36232	8.18492
Eif2b5	0.086874	0.0208333	24	0	2.47799	15.1794	11.9359	10.011	13.7763
Mrpl49	0.086874	0.0208333	24	3	2.4771	26.997	24.3839	20.8311	23.5435
Rbm6	0.086874	0.0208333	24	0	2.47494	26.7806	23.5359	20.504	24.2595
Mxd3	0.086874	0.0208333	24	9	2.47388	48.7109	51.0433	49.7386	44.1774
Gusb	0.086874	0.0208333	24	3	2.46721	13.0843	9.75325	7.06244	8.79679
Surf1	0.086874	0.0208333	24	21	2.46218	34.9442	31.2487	31.7203	34.9889
Nr1i3	0.086874	0.0208333	24	9	2.46187	3.5931	6.45604	5.41142	1.31115
Prdx3	0.086874	0.0208333	24	3	2.4601	52.236	41.0284	38.709	39.3841
Rbx1	0.086874	0.0208333	24	3	2.45999	32.9442	28.5301	26.2108	27.5785
Utp11l	0.086874	0.0208333	24	21	2.45836	16.4785	13.8149	16.3112	20.6009
Rbm38	0.086874	0.0208333	24	12	2.45232	2.56305	5.157	7.06434	2.72209
Gnb5	0.086874	0.0208333	24	15	2.45102	5.71492	6.17819	10.754	8.07165
Ppih	0.086874	0.0208333	24	3	2.4497	23.2746	16.6672	14.3576	15.9862
Pppde2	0.086874	0.0208333	24	21	2.44047	15.1571	11.2534	12.9943	15.9933
Rnaset2b	0.086874	0.0208333	24	0	2.44006	12.823	2.76411	1.45111	3.75162
Sf1	0.086874	0.0208333	24	21	2.43803	26.0638	21.4334	25.414	27.7126
Marcks	0.086874	0.0208333	24	3	2.43522	7.60181	4.89117	2.59219	3.01296
Nol7	0.086874	0.0208333	24	3	2.42912	27.3899	24.9332	21.5187	23.9338
3110002H16Rik	0.086874	0.0208333	24	18	2.42736	10.5764	8.7953	12.2706	13.9667
Bbox1	0.086874	0.0208333	24	6	2.42498	4.96053	7.71776	3.38698	2.43244
Fabp5	0.086874	0.0208333	24	12	2.42392	1.8086	4.09389	12.801	3.4484
Igf2bp2	0.086874	0.0208333	24	21	2.41583	11.2122	8.93453	9.20054	14.7019
2310004I24Rik	0.086874	0.0208333	24	6	2.41258	32.7213	46.6507	31.6753	30.4467
Ctsw	0.086874	0.0208333	24	12	2.40884	5.67718	9.25088	12.2076	8.96807
Csde1	0.086874	0.0208333	24	0	2.40823	35.5852	33.3147	28.337	33.5893
Mrpl16	0.086874	0.0208333	24	3	2.40823	18.322	14.5661	12.2956	12.9912
Mrpl2	0.086874	0.0208333	24	0	2.40791	53.7542	41.1732	40.4801	42.7503
Tmc8	0.086874	0.0208333	24	12	2.39974	11.2087	14.2185	17.8573	14.0796
2700089E24Rik	0.086874	0.0208333	24	15	2.39926	6.80401	7.31092	11.0565	9.84457
Lsp1	0.086874	0.0208333	24	12	2.39523	8.56586	10.8241	15.179	9.96622
Add3	0.086874	0.0208333	24	12	2.39038	5.71504	9.04926	10.1562	6.72941
Carkd	0.086874	0.0208333	24	3	2.38659	36.7103	34.436	30.2747	34.1213
Jarid2	0.086874	0.0208333	24	15	2.38303	7.87766	7.97038	15.2429	10.1244
Ubxn6	0.086874	0.0208333	24	9	2.38136	31.9086	34.9691	34.1252	30.4502
Rnpepl1	0.086874	0.0208333	24	18	2.37747	53.8652	51.744	55.4068	56.9269
Acsf3	0.086874	0.0208333	24	3	2.37606	18.3197	15.9151	13.6142	13.9001
Psmd6	0.086874	0.0208333	24	21	2.37153	43.5767	41.3408	41.542	47.8781
Rbm17	0.086874	0.0208333	24	21	2.36792	20.2592	17.3987	18.497	22.334
BC005624	0.086874	0.0208333	24	0	2.36605	37.0688	33.6881	30.6046	33.9161
Epb4.1l1	0.086874	0.0208333	24	21	2.3633	8.64737	5.89861	6.17545	10.1111
Eif4g1	0.086874	0.0208333	24	0	2.3623	38.4193	33.0885	33.01	35.2372
Gltpd1	0.086874	0.0208333	24	0	2.34395	24.1734	18.844	17.113	19.3229
1110067D22Rik	0.086874	0.0208333	24	15	2.34395	7.29323	8.85275	12.7775	9.99817
Cyp2s1	0.086874	0.0208333	24	9	2.34236	28.319	39.3869	30.4207	28.2123
Slc33a1	0.086874	0.0208333	24	0	2.33882	14.3773	10.9403	9.97531	13.1535
2410003K15Rik	0.086874	0.0208333	24	3	2.33526	22.117	17.5435	15.3418	17.3004
Ip6k1	0.086874	0.0208333	24	9	2.33176	30.8589	37.1049	31.9856	29.7872
Trp53i13	0.086874	0.0208333	24	12	2.33112	10.5369	12.7347	21.6523	12.6902
Tmem66	0.086874	0.0208333	24	0	2.33027	120.624	118.427	97.8939	118.705
Fryl	0.086874	0.0208333	24	21	2.32736	11.7689	9.2771	9.60983	13.7008
Tln1	0.086874	0.0208333	24	15	2.32716	9.37211	11.8771	14.5793	13.2521
Sympk	0.086874	0.0208333	24	21	2.32419	14.011	11.6725	12.7897	17.025
Slc1a5	0.086874	0.0208333	24	15	2.32412	15.7127	16.4539	22.2642	17.9039
Zmynd8	0.086874	0.0208333	24	21	2.31959	14.7246	11.2588	12.6785	15.7735
Ccdc120	0.086874	0.0208333	24	9	2.31542	13.5345	22.0692	15.0979	12.9149
Alg12	0.086874	0.0208333	24	0	2.31291	19.4113	15.0974	14.3724	16.6004
Caml	0.086874	0.0208333	24	21	2.31132	10.4188	6.91789	7.80762	10.8441
Tmem70	0.086874	0.0208333	24	0	2.30171	13.1815	8.28924	8.26703	10.4371
Nlrc4	0.086874	0.0208333	24	3	2.30096	24.9233	23.3929	19.2026	22.6055
Mrpl46	0.086874	0.0208333	24	3	2.29294	26.7202	21.5652	19.4034	19.8597
2023-03-02	0.086874	0.0208333	24	12	2.28618	22.7549	27.0286	28.4918	26.2992
Cd79a	0.086874	0.0208333	24	12	2.28182	2.70763	4.85895	12.7684	3.61131
Atp6v0a1	0.086874	0.0208333	24	12	2.27992	27.4809	30.447	32.2054	28.7229
Usp19	0.086874	0.0208333	24	21	2.27901	15.5582	12.8527	13.2363	16.9768
Man1b1	0.086874	0.0208333	24	0	2.27084	24.5566	22.0919	19.1988	23.157
Ttll3	0.086874	0.0208333	24	18	2.25811	11.2063	11.0944	14.1742	14.5134
Rragd	0.086874	0.0208333	24	3	2.25732	7.45205	7.13917	3.92119	4.28536
Mrpl3	0.086874	0.0208333	24	3	2.25455	15.2288	12.7672	9.39928	12.2199
4930455C21Rik	0.086874	0.0208333	24	0	2.25311	13.4566	9.48082	9.00842	11.4054
Rsrc2	0.086874	0.0208333	24	0	2.24796	23.9296	19.8171	17.9011	20.1468
Abhd5	0.086874	0.0208333	24	12	2.24674	8.55657	11.6925	14.4723	11.2535
Bcat2	0.086874	0.0208333	24	9	2.24328	6.15047	9.38682	7.12811	4.01952
Hoxb6	0.086874	0.0208333	24	18	2.23972	6.76268	4.73283	6.84446	14.4441
D15Ertd621e	0.086874	0.0208333	24	3	2.23661	12.8546	12.1401	7.6714	10.7459
Cnn2	0.086874	0.0208333	24	12	2.23619	11.0328	13.1411	19.2519	12.3273
Rgs2	0.086874	0.0208333	24	12	2.23431	9.30281	12.9494	14.0123	11.3393
Imp4	0.086874	0.0208333	24	3	2.23279	11.1993	7.91505	4.9835	7.81558
Gm5535	0.086874	0.0208333	24	0	2.23217	4.48246	0.536843	0.313343	2.68126
Tmem176a	0.086874	0.0208333	24	12	2.2311	27.399	29.5025	45.2284	28.4963
Ltbp4	0.086874	0.0208333	24	15	2.22527	2.51193	3.57159	7.38903	4.98849
BC029722	0.086874	0.0208333	24	9	2.2242	13.3716	16.1008	15.8081	12.2463
Ccl28	0.086874	0.0208333	24	18	2.22415	5.50034	3.66565	5.7626	10.8699
Anapc5	0.086874	0.0208333	24	9	2.22367	14.5229	16.9769	16.1713	12.3358
Wrnip1	0.086874	0.0208333	24	18	2.21928	9.08897	7.65367	10.787	12.2327
Rnf13	0.086874	0.0208333	24	12	2.21616	8.23344	11.8983	13.5958	10.9924
Mul1	0.086874	0.0208333	24	0	2.21519	17.9058	13.288	12.0162	14.1047
Kri1	0.086874	0.0208333	24	6	2.21406	15.7356	15.8994	13.3148	12.0579
Npc2	0.086874	0.0208333	24	6	2.21179	32.9224	35.8202	32.3211	30.1656
Bop1	0.086874	0.0208333	24	21	2.21067	12.68	9.15849	10.3639	13.0951
Orai1	0.086874	0.0208333	24	21	2.20656	17.93	15.4117	16.6521	20.3749
Pex11a	0.086874	0.0208333	24	18	2.20656	15.7316	14.8449	18.1068	18.7108
1300010F03Rik	0.086874	0.0208333	24	6	2.20452	12.4088	14.1292	11.1012	9.20147
Rep15	0.086874	0.0208333	24	6	2.19387	11.4207	12.447	10.3786	5.31338
Cml1	0.086874	0.0208333	24	9	2.19266	7.44116	10.1523	8.97827	5.48762
Slc47a1	0.086874	0.0208333	24	12	2.19255	4.72833	6.79549	18.3303	5.18192
Slc35b2	0.086874	0.0208333	24	0	2.19026	18.7196	16.6546	12.7119	18.3958
Ankrd54	0.086874	0.0208333	24	9	2.18772	14.7156	16.7782	15.5126	11.047
Samd9l	0.086874	0.0208333	24	15	2.1877	4.6741	4.92773	8.17745	7.61212
Agpat3	0.086874	0.0208333	24	12	2.18596	3.27173	5.33267	9.82914	3.66377
H13	0.086874	0.0208333	24	0	2.1798	28.4703	25.3673	22.8394	25.9018
Ldb1	0.086874	0.0208333	24	15	2.17966	8.04107	9.95972	13.7886	10.3772
Mpv17	0.086874	0.0208333	24	0	2.17909	9.72	6.70218	5.77168	8.91727
Tmem188	0.086874	0.0208333	24	3	2.17647	18.209	17.9128	10.7049	16.157
Galnt10	0.086874	0.0208333	24	3	2.17633	20.5387	18.9926	15.2092	18.1665
Zfp513	0.086874	0.0208333	24	3	2.17255	22.2663	20.2427	17.3753	18.9888
Fam83g	0.086874	0.0208333	24	9	2.16947	16.9351	20.1169	17.0893	14.1349
Rnf141	0.086874	0.0208333	24	18	2.16758	7.92029	7.30404	9.41227	11.9429
Vipar	0.086874	0.0208333	24	3	2.1647	19.4196	18.2138	15.5362	15.9745
Hnrnpa3	0.086874	0.0208333	24	3	2.16014	26.4038	26.0528	22.8325	23.5143
Mbnl2	0.086874	0.0208333	24	0	2.15968	17.0297	14.4196	12.5135	16.0119
Rbm5	0.086874	0.0208333	24	6	2.15767	33.2719	34.9614	31.9452	30.1853
Tex261	0.086874	0.0208333	24	3	2.15409	43.1173	34.1199	32.089	33.7922
Hip1r	0.086874	0.0208333	24	3	2.15006	33.4352	31.351	28.4415	30.2634
Dnajb2	0.086874	0.0208333	24	12	2.14614	19.8865	21.9099	34.1099	20.4194
Thumpd3	0.086874	0.0208333	24	0	2.14437	14.4569	12.1423	10.5696	14.3202
Fxc1	0.086874	0.0208333	24	3	2.14211	33.093	28.3873	26.3677	26.7142
Gas6	0.086874	0.0208333	24	15	2.13872	9.00078	11.7163	14.8989	11.8674
Pafah1b1	0.086874	0.0208333	24	6	2.13606	42.3181	59.3423	41.5307	40.3042
C330006A16Rik	0.086874	0.0208333	24	18	2.13585	13.8396	11.3708	15.5207	15.8533
Ttc39c	0.086874	0.0208333	24	12	2.13397	8.05381	11.6235	12.5964	10.1303
Usp5	0.086874	0.0208333	24	3	2.13306	18.6635	16.4707	13.9653	15.1357
1110046J04Rik	0.086874	0.0208333	24	6	2.13106	5.75059	10.5581	4.70504	3.74141
Ddi2	0.086874	0.0208333	24	0	2.12992	7.83545	4.83817	3.68767	6.7147
1110032A03Rik	0.086874	0.0208333	24	6	2.12966	14.5716	16.3348	13.4894	11.3934
Siah2	0.086874	0.0208333	24	9	2.12908	5.64185	9.32722	7.6567	5.32011
Poldip2	0.086874	0.0208333	24	3	2.12015	18.6586	18.1564	15.2576	15.5607
Pcgf5	0.086874	0.0208333	24	9	2.1186	8.1837	10.6396	9.24123	5.70483
Fermt1	0.086874	0.0208333	24	21	2.1114	9.59705	6.10987	7.43752	9.92229
Frat2	0.086874	0.0208333	24	6	2.11126	4.32956	6.97751	2.99716	2.33837
Zmpste24	0.086874	0.0208333	24	3	2.10586	12.6657	11.0277	8.10715	9.62999
Pqbp1	0.086874	0.0208333	24	15	2.10276	19.5797	22.7888	24.7932	23.5228
Snhg7	0.086874	0.0208333	24	15	2.10119	4.13549	4.77678	7.70903	7.1463
Rp9	0.086874	0.0208333	24	18	2.09738	19.2171	19.1564	21.7881	22.5177
Gimap6	0.086874	0.0208333	24	12	2.09532	6.24209	9.91844	12.0383	9.78819
Rnf4	0.086874	0.0208333	24	0	2.09417	23.3685	21.3941	16.2012	22.3149
Fam76a	0.086874	0.0208333	24	12	2.09345	8.91113	11.5501	12.9809	9.69869
Mfsd11	0.086874	0.0208333	24	6	2.08508	17.7913	17.9555	15.2565	14.5928
Pitpnb	0.086874	0.0208333	24	0	2.0842	19.8344	17.3064	16.0997	19.4667
Drg2	0.086874	0.0208333	24	0	2.08314	20.9538	15.3857	14.8835	16.8475
Scoc	0.086874	0.0208333	24	9	2.08158	6.89759	9.16782	8.82691	5.20955
Cherp	0.086874	0.0208333	24	21	2.08121	11.2246	8.30852	9.14783	12.1183
Tmem5	0.086874	0.0208333	24	21	2.07993	5.38944	3.30949	4.10995	7.91294
Ccdc28a	0.086874	0.0208333	24	3	2.07988	15.8105	13.9283	10.8969	12.9591
Csk	0.086874	0.0208333	24	3	2.07554	51.8192	50.1388	47.9219	48.1656
Urm1	0.086874	0.0208333	24	3	2.07378	11.8548	10.4781	7.92	8.54736
Chtf8	0.086874	0.0208333	24	0	2.07246	17.8444	15.1366	14.6659	17.8199
H2-T22	0.086874	0.0208333	24	21	2.07055	6.52716	3.36471	4.53304	7.22699
Rnaseh2b	0.086874	0.0208333	24	12	2.06705	2.6228	5.73897	7.26046	4.53012
Ciz1	0.086874	0.0208333	24	18	2.06528	19.1339	17.4133	19.5132	22.8755
Akr1c14	0.086874	0.0208333	24	15	2.06342	0.25638	1.84233	9.92372	2.20179
Clint1	0.086874	0.0208333	24	3	2.06129	39.6368	36.9813	35.0379	35.2184
Sel1l	0.086874	0.0208333	24	9	2.05934	22.4466	25.3139	23.071	20.1136
Socs1	0.086874	0.0208333	24	9	2.05779	12.553	19.7986	12.84	10.8999
Clca4	0.086874	0.0208333	24	18	2.05753	5.58289	3.99281	7.67959	7.71569
Vrk3	0.086874	0.0208333	24	0	2.05238	30.6109	26.9527	25.3665	27.5133
Slc9a3r2	0.086874	0.0208333	24	12	2.05222	6.70773	9.12533	12.2174	8.83044
Slc36a1	0.086874	0.0208333	24	6	2.05206	7.63591	8.43061	6.25612	4.00629
Tmcc1	0.086874	0.0208333	24	9	2.05069	9.02715	11.2809	10.3918	6.84532
Safb	0.086874	0.0208333	24	18	2.05022	22.641	22.1402	24.9767	25.6034
Tnni1	0.086874	0.0208333	24	6	2.04883	5.62147	5.75459	3.72283	1.85827
Tmem126b	0.086874	0.0208333	24	0	2.04704	12.8868	10.8247	8.39619	12.124
Gramd1a	0.086874	0.0208333	24	12	2.04667	5.16863	7.86635	10.2556	7.16445
Tpsg1	0.086874	0.0208333	24	15	2.04311	14.0385	15.3477	18.8556	16.3094
Ufm1	0.086874	0.0208333	24	3	2.0422	18.8044	17.2012	14.4461	15.7833
Eif2s1	0.086874	0.0208333	24	21	2.04184	11.7458	8.40046	9.43274	11.8626
2510039O18Rik	0.086874	0.0208333	24	6	2.0393	53.3905	54.7579	51.2704	51.11
Ola1	0.086874	0.0208333	24	21	2.03763	13.4946	11.4809	11.9642	15.7138
Trf	0.086874	0.0208333	24	12	2.03552	1.85151	5.62683	6.82737	4.84538
Arrdc4	0.086874	0.0208333	24	0	2.03159	14.5547	12.6393	8.9412	13.3974
Smarcc2	0.086874	0.0208333	24	18	2.03032	18.3433	17.0096	18.9238	22.8125
Cox18	0.086874	0.0208333	24	3	2.01848	6.13624	6.02545	2.39392	4.05864
Tor1aip1	0.086874	0.0208333	24	6	2.01756	10.6322	12.455	9.01816	8.36251
Minpp1	0.086874	0.0208333	24	9	2.01635	20.5942	23.7953	21.4376	18.9356
Isoc1	0.086874	0.0208333	24	9	2.01389	10.6462	14.2805	10.7401	8.67826
Tmem189	0.086874	0.0208333	24	15	2.01353	2.85476	5.13641	7.18417	6.50212
Xylt2	0.086874	0.0208333	24	21	2.01235	8.12828	5.28063	5.38634	8.23048
Pick1	0.086874	0.0208333	24	21	2.0114	14.3094	11.1345	12.6102	15.1244
Ccdc25	0.086874	0.0208333	24	3	2.00995	33.6798	32.9031	28.4906	31.7848
Fam78a	0.086874	0.0208333	24	15	2.00677	6.96026	7.0239	10.3215	9.33866
Fam50a	0.086874	0.0208333	24	18	2.00574	13.3118	10.5874	13.5636	16.0087
Sirt6	0.086874	0.0208333	24	21	2.00506	9.16339	6.69445	7.41746	10.6197
Myst1	0.086874	0.0208333	24	0	2.00416	10.3718	7.69853	7.16195	10.1573
Rxrb	0.086874	0.0208333	24	3	2.00228	16.7374	14.5984	12.2308	13.4417
Pde8b	0.086874	0.0208333	24	3	2.00127	7.02052	4.92259	2.80358	3.47907
Dhx38	0.086874	0.0208333	24	3	1.99959	14.5709	12.6297	9.61601	11.9289
Birc3	0.086874	0.0208333	24	9	1.99952	17.3131	20.8693	17.7182	15.6189
Gramd1c	0.086874	0.0208333	24	9	1.99907	5.9824	8.40991	7.6844	4.4577
Eif3a	0.086874	0.0208333	24	21	1.99742	12.884	9.60924	10.7248	13.0996
Gtpbp5	0.086874	0.0208333	24	0	1.99366	7.22323	4.05923	3.44153	5.91645
Syt12	0.086874	0.0208333	24	6	1.99313	10.8137	13.1621	9.47426	8.86412
Clk3	0.086874	0.0208333	24	9	1.98909	38.1708	41.646	38.3935	36.2427
Mustn1	0.086874	0.0208333	24	12	1.98751	1.26479	3.13863	7.14388	3.02623
Slc6a14	0.086874	0.0208333	24	15	1.98478	0	0.383558	3.28349	2.71388
Dact2	0.086874	0.0208333	24	18	1.98296	9.38775	8.3668	11.5481	11.8151
Dynlt1a	0.086874	0.0208333	24	6	1.98276	16.1752	16.8868	14.7206	12.7333
2023-09-02	0.086874	0.0208333	24	0	1.97771	23.2669	19.87	18.8701	21.067
Krcc1	0.086874	0.0208333	24	6	1.97753	35.0823	35.5612	33.6202	31.43
Mapk1ip1	0.086874	0.0208333	24	15	1.97552	6.21796	8.29289	11.1284	8.97006
Nfs1	0.086874	0.0208333	24	3	1.97399	16.2957	15.0538	12.7385	13.0277
Nab2	0.086874	0.0208333	24	9	1.97397	6.5069	9.8649	8.07278	5.84756
Sgms2	0.086874	0.0208333	24	9	1.97369	7.84052	11.551	9.06498	7.19301
Timm22	0.086874	0.0208333	24	6	1.97166	9.42466	10.8232	7.40184	7.26931
Fam158a	0.086874	0.0208333	24	9	1.96919	12.1962	14.0619	13.9093	10.2053
Pgcp	0.086874	0.0208333	24	15	1.96904	1.14638	2.40268	5.68972	3.42863
Anxa1	0.086874	0.0208333	24	15	1.96903	1.51781	1.9434	5.44011	3.59035
Irgm2	0.086874	0.0208333	24	12	1.96728	15.4919	18.3533	19.3164	16.6135
Samhd1	0.086874	0.0208333	24	12	1.96714	17.3547	19.4707	21.2348	17.7869
Deaf1	0.086874	0.0208333	24	12	1.96551	12.2569	14.11	17.5997	13.3691
Stx16	0.086874	0.0208333	24	21	1.95533	13.6989	10.4925	12.9722	15.2963
Cct6a	0.086874	0.0208333	24	21	1.95374	17.6125	14.6879	16.4591	19.0605
Usp12	0.086874	0.0208333	24	9	1.94716	28.016	40.3307	29.7401	27.9043
Pxmp4	0.086874	0.0208333	24	6	1.94274	13.1296	14.3204	11.3409	10.6142
[truncated: 21,734 more rows]
